# Supplementary material for: Degrasyn exhibits antibiotic activity against multi-resistantStaphylococcus aureusby modifying several essential cysteines
Source: Royal Society of Chemistry journal article supplement (doi:10.1039/c9cc09204h), 2020-01-01
Supplement: c9cc09204h2.xlsx [file c9cc09204h2.xlsx]

## Sheet: Table of Contents
Worksheet	Information
Hits	All competitive data using isoDTB-ABPP in the strain S. aureus NCTC8325 for all DGS concentrations filtered to only include cysteines that are significant hits
All cysteines	All competitive data using isoDTB-ABPP in the strain S. aureus NCTC8325 for all DGS concentrations for all cysteines
Concentration dependence	Competitive data using isoDTB-ABPP in the strain S. aureus NCTC8325 for all hit cysteines that are detected for all four DGS concentrations together with the fit parameters for a dose-recponse fit
DGS 100 µM	Competitive data using isoDTB-ABPP for 100 µM DGS in S. aureus NCTC8325
DGS 50 µM	Competitive data using isoDTB-ABPP for 50 µM DGS in S. aureus NCTC8325
DGS 20 µM	Competitive data using isoDTB-ABPP for 20 µM DGS in S. aureus NCTC8325
DGS 10 µM	Competitive data using isoDTB-ABPP for 10 µM DGS in S. aureus NCTC8325
15 25 µM	Conventional ABPP (enrichment studies) data for 25 µM 15 in S. aureus NCTC8325
15 12.5 µM	Conventional ABPP (enrichment studies) data for 12.5 µM 15 in S. aureus NCTC8325
15 6.25 µM	Conventional ABPP (enrichment studies) data for 6.25 µM 15 in S. aureus NCTC8325
DGS,15-100,12.5 µM	Conventional ABPP (competitive studies) data for pre-treatment with 100 µM DGS and treatment with 12.5 µM 15 in S. aureus NCTC8325
DGS,15-62.5,12.5 µM	Conventional ABPP (competitive studies) data for pre-treatement with 62.5 µM DGS and treatment with 12.5 µM 15 in S. aureus NCTC8325
DGS,15-12.5,12.5 µM	Conventional ABPP (competitive studies) data for pre-treatment with 12.5 µM DGS and treatment with 12.5 µM 15 in S. aureus NCTC8325
Global analysis	Global analysis of protein expression levels using ½ MIC concentration DGS in S. aureus NCTC8325
Column header	Information
Identifier	Identifier of the quantified cysteine in the format "UniProt code"_"C""residue number"
Leading razor protein	UniProt code of the leading razor protein
Sequence	Sequence of the detected peptide (If several peptides were combined for the same cysteine, the shortest sequence is given); * indicates the cysteine modified with IA-alkyne and the isoDTB tag
Gene name	Name of the corresponding gene according to UniProt (in case of more than one protein ID for the first protein ID)
Name	Name of the protein according to UniProt (in case of more than one protein ID for the first protein ID)
Essential?	Yes, if the gene is essential; No, if the gene is non-essential according to the DEG database (in case of more than one protein ID for the first protein ID)
GO class	Functional class of the corresponding protein derived from Gene Ontology terms reported in UniProt (in case of more than one protein ID for the first protein ID)
Functional site	Whether or not a residue is within five residues of an annotated functional site according to UniProt
Median log2(R)	Median of log2(R) for the respective condition (If there is a "+" in the following column, this compound is considered a hit indicating p < 0.05 and log2(R) > 2)
log2(R)	Individual values of log2(R) for the respective condition (for isoDTB-ABPP)
Median % competition	Median of the % competition calculated from the log2(R) for the respective condition
EC50 in mM	EC50 calculated from a dose-response fit of the values for the Median % competition
95% Confidence Interval EC50 in mM	95% confidence interval of the EC50 value in mM
R2	R2 calculated from a dose-response fit of the values for the Median % competition
Neg. log10(p)	Result of a one-sample t-test (-log10(p)) testing the probability that the value of log2(R) is equal to 0
T-test significant	"+", if p < 0.05
Hit?	"+", if p < 0.05 and log2(R) > 1 for the global analysis of protein expression levels or "+", if p < 0.05 and log2(R) > 2 for all other analyses
Protein IDs	UniProt code of the identified proteins
GO terms	Gene Ontology terms associated with the protein according to Uniprot (in case of more than one protein ID for the first protein ID)
log2(R)	log2(R) derived from LFQ values as the Student's T-test difference in Perseus (for all other studies)
log2(LFQ intensity)	log2-transformed LFQ (Label-free quantification) intensities calculated by MaxQuant for the respective sample

## Sheet: Hits
Identifier	Leading razor protein	Sequence	Gene name	Name	Essential?	GO class	Functional site	Median log2(R) 100 mM DGS		Median log2(R) 50 mM DGS		Median log2(R) 20 mM DGS		Median log2(R) 10 mM DGS			log2(R) 100 mM DGS 1	log2(R) 100 mM DGS 2	log2(R) 50 mM DGS 1	log2(R) 50 mM DGS 2	log2(R) 20 mM DGS 1	log2(R) 20 mM DGS 2	log2(R) 10 mM DGS 1	log2(R) 10 mM DGS 2
Q2FXI5_C317	Q2FXI5	ANIGIPTAVIGVUAR	SAOUHSC_01861	Uncharacterized protein	no	Enzyme	Functional site	4.01014	+					0.880077			3.95401	4.06626					1.0092	0.750949
Q2G112_C97	Q2G112	VFVTEVVUDSVQFLEPK	SAOUHSC_00349	Single-stranded DNA-binding protein	yes	Gene expression and Nucleic acid binding		3.71139	+	2.68718	+	1.15205		0.607907			3.82334	3.59944	2.76655	2.6078	1.18764	1.11647	0.733032	0.482783
Q2G243_C99	Q2G243	STLLLQIUASLSQK	radA	DNA repair protein RadA	no	Gene expression and Nucleic acid binding		3.43898	+	2.69035	+	1.71073		1.41028			3.5064	3.37156	2.859	2.5217	2.07902	1.34244	1.46503	1.35552
Q2FVI7_C265	Q2FVI7	SVNQIPGSGAAGGMGAALLAFUETTLTK	SAOUHSC_02723	Glycerate kinase, putative	no	Enzyme		3.43642	+	2.9724	+	2.26738	+	1.05873			3.49044	3.38239	2.84762	3.09719	2.40149	2.13327	1.08868	1.02878
Q2FYG1_C250	Q2FYG1	LGADPMTFLGLGGIGDLIVTUTSTHSR	gpsA	Glycerol-3-phosphate dehydrogenase [NAD(P)+]	no	Enzyme		3.34872	+	2.78093	+	1.4907		0.717118			3.44374	3.2537	2.82087	2.74099	1.56321	1.41819	0.76757	0.666666
Q2G1S4_C254	Q2G1S4	MIUSSGNVDSNR	SAOUHSC_00018	Replicative DNA helicase	yes	Gene expression and Nucleic acid binding		3.3164	+	2.71085	+	1.66169		0.822697			3.47625	3.15654	2.81912	2.60258	1.675	1.64837	0.846473	0.798921
Q2G115_C101	Q2G115	EVDAIUQVVR	ychF	Ribosome-binding ATPase YchF	no	Modulator/Scaffolding/Adaptor		3.28821	+	3.07882		2.44114		1.55738			3.37962	3.1968	3.44784	2.7098	2.81013	2.07214	1.59431	1.52045
Q2G1X6_C23	Q2G1X6	AIVVFSGGQDSTTULFYAK	queC	7-cyano-7-deazaguanine synthase	no	not assigned	Functional site	3.27641	+					0.912829			3.36989	3.18293					0.846072	0.979586
Q2FZR9_C165	Q2FZR9	GPNGATVTAUATGTNSIGEAFK	fabF	3-oxoacyl-[acyl-carrier-protein] synthase 2	yes	Enzyme	Functional site	3.17486	+	1.72282		0.361182		0.126171			3.26872	3.081	1.71559	1.73005	0.33754	0.384823	0.174279	0.0780633
Q2FZ17_C141	Q2FZ17	TADGEPVVYULDK	SAOUHSC_01254	Uncharacterized protein	no	Gene expression and Nucleic acid binding		3.14948	+	2.83529	+	2.03788	+	0.827367			3.28082	3.01814	2.93486	2.73572	2.04914	2.02662	0.93859	0.716143
Q2G038_C250	Q2G038	QAGQPFIDYVIUSTQTFNAQVLK	SAOUHSC_00788	Gluconeogenesis factor	yes	not assigned		3.13986	+	2.66983	+	1.74976		0.940874			3.19623	3.08349	2.60345	2.73622	1.75979	1.73972	0.995159	0.886589
Q2FXM9_C8	Q2FXM9	IVUTIGPASESEEMIEK	pyk	Pyruvate kinase	yes	Enzyme		3.13889	+	2.95271	+	1.81138		0.667164			3.20521	3.07257	2.97711	2.92831	1.82385	1.79892	0.757666	0.576663
Q2FXI5_C238	Q2FXI5	ASAEMIDPDVAFVVDUSPANDVK	SAOUHSC_01861	Uncharacterized protein	no	Enzyme	Functional site	2.98934	+					1.03307			2.93318	3.04551					1.1141	0.952035
Q2G164_C62	Q2G164	AYVLNEDYPIVUIGAANVDRK	SAOUHSC_00291	PfkB family carbohydrate kinase family, putative	no	Enzyme		2.92258	+	2.04052				0.958371			2.98932	2.85583	1.77151	2.30953			1.01935	0.897395
Q53727_C92	Q53727	LVGDQAEVIWMSTFHSMUVR	pcrA	ATP-dependent DNA helicase PcrA	yes	Gene expression and Nucleic acid binding		2.92094	+					1.23475			3.05653	2.78534					1.28795	1.18155
Q2G0R0_C480	Q2G0R0	IUGLLGGR	ftsH	ATP-dependent zinc metalloprotease FtsH	no	Enzyme		2.88521	+	2.37268	+	1.58741		0.928122			3.07605	2.69437	2.42806	2.3173	1.69746	1.47737	0.93017	0.926075
Q2G1Z4_C439	Q2G1Z4	AQSLIMGUYGIGISR	proS	Proline--tRNA ligase	yes	Gene expression and Nucleic acid binding		2.85908	+	2.80327	+	1.92197		1.12459			3.04138	2.67679	2.94613	2.6604	1.9879	1.85603	1.16137	1.0878
Q2FZC6_C72	Q2FZC6	MLVIAUNTATAVALEYLQK	murI	Glutamate racemase	yes	Enzyme	Functional site	2.8514	+			0.971538		0.727511			2.97677	2.72602			1.13086	0.812211	0.720366	0.734655
Q2FZ17_C175	Q2FZ17	EQSNHNIUYADTEIEAVNYEPR	SAOUHSC_01254	Uncharacterized protein	no	Gene expression and Nucleic acid binding		2.84926	+	2.39489	+	1.54128		0.520209			2.86726	2.83125	2.35724	2.43253	1.65883	1.42374	0.57889	0.461529
Q2FZG9_C297	Q2FZG9	HELLILUTGSQGEPMAALSR	rnj1	Ribonuclease J 1	yes	Gene expression and Nucleic acid binding		2.84641	+	2.187	+	1.58965		0.691774			2.8789	2.81392	2.23736	2.13664	1.6052	1.57411	0.706196	0.677353
Q2G0B0_C183	Q2G0B0	QLGMIUASIPTYK	SAOUHSC_00695	Uncharacterized protein	no	not assigned		2.80418	+			1.42444		0.791561			2.87468	2.73368		1.73178	1.48017	1.36871	0.991826	0.591296
Q2FXY7_C383	Q2FXY7	EFGIELIATAPSVIYQUVLR	lepA	Elongation factor 4	no	not assigned		2.80173	+	2.23115	+	1.44152		0.918108			2.87272	2.73074	2.20839	2.2539	1.45786	1.42519	0.917243	0.918974
Q2FX19_C215	Q2FX19	ALELMUR	SAOUHSC_02087	Conserved hypothetical phage protein	no	not assigned		2.79096	+			2.31471		1.58036			2.8868	2.69513			2.7801	1.84932	1.62293	1.53779
Q2G1J0_C290	Q2G1J0	SANIILDDANLDLAVEGIQLGILFNQGEVUSAGSR	aldA	Putative aldehyde dehydrogenase AldA	no	Enzyme	Functional site	2.77266	+	1.82556				1.24995			2.82316	2.72216	1.85408	1.79705			1.30153	1.19837
Q2FY04_C100	Q2FY04	ELUDDDMPVYMTNHK	SAOUHSC_01670	Cytidine deaminase	no	Enzyme		2.76784	+	1.25539		1.45157		1.05418			2.78668	2.749	1.23518	1.2756	1.42546	1.47768	1.07259	1.03576
Q2FZR9_C220	Q2FZR9	ALSTNDDIETAUR	fabF	3-oxoacyl-[acyl-carrier-protein] synthase 2	yes	Enzyme		2.74739	+	1.90738		0.684275		0.338406			2.88131	2.61346	1.91938	1.89538	0.742437	0.626112	0.374288	0.302524
Q2FZ66_C120	Q2FZ66	HDYGNSVUVTTQVGCR	rlmN	Probable dual-specificity RNA methyltransferase RlmN	no	Gene expression and Nucleic acid binding		2.73606	+			1.18822		0.757918			2.84386	2.62826			1.01528	1.36115	0.759582	0.756255
Q2FZJ0_C55	Q2FZJ0	QPNFTETGIFSVMWSEHUSYK	purL	Phosphoribosylformylglycinamidine synthase subunit PurL	no	Enzyme	Functional site	2.72984	+			1.17923		0.320044			2.83609	2.62359			1.36272	0.995738	0.413702	0.226385
Q2FXM9_C410	Q2FXM9	QUSIVWGVQPVVK	pyk	Pyruvate kinase	yes	Enzyme		2.72772	+	2.2288	+	1.15517		0.516335			2.77853	2.67691	2.33528	2.12233	1.13887	1.17147	0.592775	0.439894
Q2G1T3_C54	Q2G1T3	ATNPEQLFAAGYASUFNGAFDLILK	SAOUHSC_00831	Organic hydroperoxide resistance protein-like	no	not assigned		2.71547	+	2.46296	+	0.0431684		0.00352933			2.78432	2.64662	2.48579	2.44013	0.0657102	0.0206267	0.00518438	0.00187429
Q2FZG9_C191	Q2FZG9	MAQLGEEGVLULLSDSTNSLVPDFTLSER	rnj1	Ribonuclease J 1	yes	Gene expression and Nucleic acid binding		2.69769	+	2.06068	+	1.10968		0.609804			2.79335	2.60203	2.10507	2.01628	1.14156	1.07779	0.648465	0.571143
Q2FUW0_C139	Q2FUW0	ESPVHFEUEYVQTIR	SAOUHSC_02991	Uncharacterized protein	no	not assigned		2.69156	+	2.20616		0.886248		0.278122			2.8036	2.57952	2.45141	1.96092	0.89538	0.877116	0.314233	0.242012
Q2FY27_C252	Q2FY27	VANYIGYLUSIISVTSNPK	SAOUHSC_01646	Glucokinase, putative	no	Enzyme		2.64744	+	2.85933	+	2.02138	+	1.05317			2.78791	2.50696	2.8256	2.89305	2.0794	1.96336	1.08706	1.01927
O07325_C203	O07325	ELGAUVIDIGEDVTQVAFYER	ftsA	Cell division protein FtsA	yes	not assigned		2.62543		2.35766	+	1.72659		0.934812			2.89577	2.3551	2.48872	2.2266	1.75198	1.70119	0.904966	0.964657
Q2FYG6_C136	Q2FYG6	VHQLISESIVDVUR	SAOUHSC_01486	Heptaprenyl diphosphate syntase component II, putative	no	Enzyme		2.62007	+					0.75523			2.75726	2.48287					0.686792	0.823668
Q2FVI4_C61	Q2FVI4	NNGDLAGILGLUIPELDGK	SAOUHSC_02726	Positive transcriptional activator, putative	no	not assigned		2.60457	+	1.44213		0.992668		1.01958			2.73099	2.47814	1.23616	1.6481	1.2634	0.721941	1.05388	0.985282
Q2G1D7_C29	Q2G1D7	YILFTQGULLR	pflA	Pyruvate formate-lyase-activating enzyme	no	Enzyme	Functional site	2.60382	+	2.17801	+	0.989585		0.341424			2.69977	2.50787	2.2532	2.10283	1.04348	0.935686	0.394075	0.288772
Q2G1Z8_C1254	Q2G1Z8	ENEVPDWYLDSULK	polC	DNA polymerase III PolC-type	yes	Gene expression and Nucleic acid binding		2.59457	+					0.538705			2.44509	2.74405					0.628813	0.448597
Q2FZ31_C225	Q2FZ31	YFEGUMPFEVMAER	trmFO	Methylenetetrahydrofolate--tRNA-(uracil-5-)-methyltransferase TrmFO	no	Gene expression and Nucleic acid binding		2.59067	+	1.82387		1.07272		0.417006			2.61816	2.56319	1.81262	1.83512	1.12247	1.02297	0.502081	0.33193
Q2FY27_C237	Q2FY27	AGDQFUIFITEK	SAOUHSC_01646	Glucokinase, putative	no	Enzyme		2.57867	+	2.80829	+	1.98152		0.906901			2.70026	2.45707	2.79687	2.81971	1.979	1.98404	0.981926	0.831877
Q2FVV9_C386	Q2FVV9	QVIGTNNVDNUSR	SAOUHSC_02582	Putative formate dehydrogenase SAOUHSC_02582	no	Enzyme		2.57191	+	1.90733		0.823172		0.68803			2.64674	2.49708	1.94972	1.86493	1.14137	0.504976	0.674732	0.701327
Q2FWY9_C186	Q2FWY9	QPAAYUGVVGMK	gatA	Glutamyl-tRNA(Gln) amidotransferase subunit A	yes	Enzyme		2.57081	+	1.62428		0.975512		0.434007			2.65567	2.48594	1.77396	1.47461	1.00999	0.941031	0.573267	0.294748
Q2G1T3_C120	Q2G1T3	YLQMAHEFUPYSK	SAOUHSC_00831	Organic hydroperoxide resistance protein-like	no	not assigned		2.567	+	0.731881		0.00128896					2.56891	2.56509	0.797096	0.666666	-0.0600964	0.0626744
Q2FYV2_C207	Q2FYV2	SSAISNTMIUALAQHNYELAGK	thrB	Homoserine kinase	no	Enzyme		2.55876	+					0.407934			2.51508	2.60243					0.295723	0.520146
Q2FXA5_C343	Q2FXA5	TSDTDITAUTWTSK	SAOUHSC_01960	Protoporphyrinogen oxidase	no	Enzyme		2.55632	+					0.502213			2.4619	2.65074					0.489978	0.514447
Q2G1K9_C602	Q2G1K9	IGMPENATFIUIPTTSGTGSEVTPFAVITDSETNVK	SAOUHSC_00113	Aldehyde-alcohol dehydrogenase	no	Enzyme		2.53509	+	1.7941		1.34714		1.03043			2.59335	2.47682	1.87054	1.71765	1.42524	1.26903	1.09909	0.961771
Q2G0T6_C124	Q2G0T6	AQEYSTVVVDHUFDYFEK	SAOUHSC_00441	Uncharacterized protein	no	not assigned		2.51662	+					1.21351			2.50658	2.52667					1.25471	1.1723
Q2FVG8_C207	Q2FVG8	LADKIUIMSEGK	SAOUHSC_02744	Amino acid ABC transporter, ATP-binding protein, putative	no	not assigned		2.51357	+			0.409987		0.828225			2.49208	2.53506			1.04341	-0.223441	0.939678	0.716771
Q2FV62_C235	Q2FV62	GAVFVNUAR	SAOUHSC_02875	D-lactate dehydrogenase, putative	no	Enzyme		2.49806	+	1.54743		1.05591		0.774279			2.57311	2.42301	1.4897	1.60516	1.12473	0.987103	0.797179	0.751378
Q2FW16_C84	Q2FW16	FDENAUVIIR	rplN	50S ribosomal protein L14	yes	Modulator/Scaffolding/Adaptor		2.49023	+	2.22955	+	1.5146		0.499871			2.5553	2.42516	2.24647	2.21263	1.6291	1.4001	0.513491	0.486251
Q2G1K9_C258	Q2G1K9	TFDNGMIUASEQVVVIDK	SAOUHSC_00113	Aldehyde-alcohol dehydrogenase	no	Enzyme		2.48489	+	1.99162		0.86018		0.380611			2.58879	2.38099	1.92239	2.06084	1.03689	0.683474	0.41956	0.341663
Q2FZ17_C152	Q2FZ17	ELTUTEYQMSNGSILSAIK	SAOUHSC_01254	Uncharacterized protein	no	Gene expression and Nucleic acid binding		2.4771	+					0.455633			2.39271	2.56149					0.535754	0.375512
Q2G0I6_C324	Q2G0I6	TSGAGGGDUGITIINK	SAOUHSC_00579	Phosphomevalonate kinase	yes	Enzyme		2.47277	+	1.4886		0.566589		0.391359			2.49452	2.45101	1.57038	1.40683	0.63519	0.497988	0.361943	0.420775
Q2G1S1_C43	Q2G1S1	LUNHYDIPTPLK	rsmI	Ribosomal RNA small subunit methyltransferase I	no	Gene expression and Nucleic acid binding		2.47038	+			0.816696		0.439097			2.52897	2.41178			0.802731	0.830661	0.463518	0.414677
Q2G0I6_C304	Q2G0I6	YLUDIAEK	SAOUHSC_00579	Phosphomevalonate kinase	yes	Enzyme		2.45928	+	1.53703		0.854887		0.738681			2.52185	2.39671	1.54389	1.53017	1.10499	0.604785	0.79452	0.682843
Q2FVI7_C80	Q2FVI7	YTVIVNDPLMRPIEAUYAR	SAOUHSC_02723	Glycerate kinase, putative	no	Enzyme		2.45117	+	1.85872		1.17575		0.636441			2.54866	2.35369	1.89406	1.82338	1.18878	1.16273	0.649202	0.62368
Q2G1D8_C691	Q2G1D8	NLTSMLDGYAMQUGHHLNINVFNR	pflB	Formate acetyltransferase	no	Enzyme		2.44882	+	1.54199		0.531205		0.411872			2.5888	2.30883	1.60274	1.48125	0.58111	0.481299	0.477781	0.345964
Q2FZF5_C36	Q2FZF5	FDEIHVUVLK	coaD	Phosphopantetheine adenylyltransferase	yes	Enzyme		2.43313	+	1.24522				0.371916			2.49459	2.37167	1.09775	1.3927			0.418676	0.325156
Q2G112_C51	Q2G112	EADFINUVVFR	SAOUHSC_00349	Single-stranded DNA-binding protein	yes	Gene expression and Nucleic acid binding		2.4317	+			1.24403		0.481484			2.61037	2.25302		2.54631	1.13394	1.35411	0.670834	0.292134
Q2FZ13_C151	Q2FZ13	TESIVAGSVUAHK	SAOUHSC_01258	Uncharacterized protein	no	not assigned		2.41724	+			0.769412		0.56956			2.50791	2.32656			0.732586	0.806238	0.593258	0.545862
Q2G1Z8_C1030	Q2G1Z8	GUTGVKR	polC	DNA polymerase III PolC-type	yes	Gene expression and Nucleic acid binding		2.40775	+	1.33768		0.638749		0.253048			2.52399	2.29152	1.52552	1.14984	0.724825	0.552672	0.323658	0.182438
Q2FXX2_C98	Q2FXX2	NIDISNDEIYNLMIYQLGALQGFUR	SAOUHSC_01708	UPF0271 protein SAOUHSC_01708	no	Enzyme		2.39306	+	2.12229	+	1.49954		0.901574			2.37801	2.40811	2.15306	2.09152	1.61321	1.38588	1.01471	0.788435
Q2G1G4_C269	Q2G1G4	FVALNYHAILDUITQSK	SAOUHSC_00160	Uncharacterized protein	no	Gene expression and Nucleic acid binding		2.39186	+	0.737267		1.19489		0.904338			2.42884	2.35488	1.46404	0.0104934	1.1689	1.22089	0.877901	0.930775
Q2FVT8_C225	Q2FVT8	VNUVAPGPFWSPLQISGGQPQSK	SAOUHSC_02604	Uncharacterized protein	no	Enzyme		2.38476	+	1.92523		1.09197		0.522423			2.51311	2.25641	2.0403	1.81016	1.14698	1.03696	0.566961	0.477885
Q2G1K9_C844	Q2G1K9	MAELAFEDQUTTANPK	SAOUHSC_00113	Aldehyde-alcohol dehydrogenase	no	Enzyme		2.38005	+	1.48239		0.661641		0.374845			2.45694	2.30317	1.48918	1.4756	0.715893	0.60739	0.422233	0.327457
P0A0Q0_C222	P0A0Q0	VGKEDFTSFUQLNELTAVVMDYEDEEKVETIK	lacR	Lactose phosphotransferase system repressor	no	Gene expression and Nucleic acid binding		2.37451	+			1.11579		1.00208			2.55238	2.19664			1.22002	1.01157	0.853916	1.15023
Q2FZU1_C116	Q2FZU1	TNSVGIAHGUTGK	argG	Argininosuccinate synthase	no	Enzyme	Functional site	2.36125	+	1.42022		0.550633		0.35643			2.45623	2.26626	1.48176	1.35868	0.620586	0.480679	0.361526	0.351335
Q2FVV9_C390	Q2FVV9	YUQAPATK	SAOUHSC_02582	Putative formate dehydrogenase SAOUHSC_02582	no	Enzyme		2.36066	+	1.55719		0.838868		0.460336			2.42164	2.29968	1.58866	1.52572	0.854395	0.823342	0.48419	0.436482
Q2FZ59_C30	Q2FZ59	AVEUYGIVGMASR	SAOUHSC_01192	Uncharacterized protein	no	not assigned		2.35865	+	1.88041		1.13504		0.832889			2.49805	2.21925	1.75826	2.00256	1.2372	1.03288	0.882447	0.783331
Q2G1Z3_C191	Q2G1Z3	LNQEQGUTIVMVLHDINQAIR	SAOUHSC_00652	Iron compound ABC transporter, ATP-binding protein	no	not assigned		2.34615	+	1.31932				0.68403			2.37796	2.31435	2.2781	0.360533			0.823179	0.544881
Q2FUW3_C371	Q2FUW3	EUITSVNEEYQAK	asp1	Accessory Sec system protein Asp1	no	not assigned		2.34314	+					1.00785			2.48179	2.20449					0.915865	1.09983
Q2G1J4_C258	Q2G1J4	VNIHQPGPGVGGHULAVDPYFIIAK	SAOUHSC_00128	Cap5O protein/UDP-N-acetyl-D-mannosaminuronic acid dehydrogenase	no	Enzyme		2.3376	+	1.3868		0.269464		0.173268			2.3981	2.27709	1.38272	1.39088	0.26292	0.276008	0.285106	0.0614306
Q2G0S3_C100	Q2G0S3	EGTTIVVUGDTPLITK	glmU	Bifunctional protein GlmU	yes	Enzyme	Functional site	2.3352	+	1.62699		0.913703		0.59797			2.44287	2.22753	1.64598	1.608	1.1236	0.70381	0.624288	0.571652
Q2G0Y9_C176	Q2G0Y9	LEEAGLTVSSLUK	xpt	Xanthine phosphoribosyltransferase	no	Enzyme		2.32853	+	1.61978		0.901782		0.522605			2.39078	2.26628	1.6769	1.56267	0.893906	0.909658	0.519341	0.525868
Q2G1E1_C135	Q2G1E1	SLASUHDAFQPLLK	SAOUHSC_00184	Uncharacterized response regulatory protein SAOUHSC_00184	no	Gene expression and Nucleic acid binding		2.3234	+					0.369044			2.40722	2.23958					0.421479	0.316609
Q2FY71_C35	Q2FY71	AEQIIDUAVENGITYFDTADMYDK	SAOUHSC_01594	Uncharacterized protein	no	not assigned		2.31147	+	1.65005		0.869617		0.676568			2.32792	2.29502	1.8004	1.49971	0.800058	0.939176	0.712821	0.640315
Q2FZ04_C50	Q2FZ04	AAANIGLEPEEVAIITGIGUSGR	SAOUHSC_01267	Uncharacterized protein	no	Enzyme		2.30728	+	1.59458		0.908126		0.425871			2.27522	2.33934	1.69131	1.49784	0.917928	0.898324	0.569005	0.282736
Q2G1D0_C379	Q2G1D0	YGMVTMUIGVGMGAAAIFEYVR	SAOUHSC_00195	Acetyl-CoA acetyltransferase, putative	no	Enzyme	Functional site	2.29997	+					0.233759			2.28724	2.31269					0.327917	0.1396
Q2FXZ5_C82	Q2FXZ5	QNINTELPVDVTIUSGLIK	SAOUHSC_01680	Ribosomal RNA small subunit methyltransferase E	no	Gene expression and Nucleic acid binding		2.29449	+					0.648076			2.37662	2.21235					0.776609	0.519542
Q2FY27_C185	Q2FY27	SGUIETVASATGVVNLVNFYYPK	SAOUHSC_01646	Glucokinase, putative	no	Enzyme		2.29274	+	1.46404		0.771729		0.668951			2.2998	2.28567	1.57046	1.35761	0.851119	0.692338	0.704518	0.633385
Q2FVQ5_C63	Q2FVQ5	LAQPGEESSNVWNNAGTGHSALUELNYTK	mqo	Probable malate:quinone oxidoreductase	no	Enzyme		2.29061	+	1.43987		0.399877		0.0742862			2.37601	2.2052	1.54592	1.33382	0.496411	0.303342	0.109294	0.0392788
Q2G1K9_C431	Q2G1K9	VLVNTPSAVGGIGDMYNELIPSLTLGUGSYGR	SAOUHSC_00113	Aldehyde-alcohol dehydrogenase	no	Enzyme		2.28669	+	1.50105		0.518722		0.192833			2.2584	2.31499	1.55341	1.44869	0.557386	0.480058	0.244887	0.140779
Q2G084_C36	Q2G084	NINQGIGEVTTALSSIUK	SAOUHSC_00736	Putative lipid kinase SAOUHSC_00736	no	Enzyme		2.27654	+	2.08596	+	1.5675		0.936635			2.20914	2.34395	2.19739	1.97453	1.60587	1.52912	1.02921	0.844064
Q2FUZ6_C38	Q2FUZ6	VILVVNTATEUIYSEQLK	SAOUHSC_02949	Glutathione peroxidase	no	Enzyme	Functional site	2.26845	+	1.27926				0.0646001			2.44186	2.09505	1.32458	1.23395			0.137897	-0.00869676
Q2G099_C193	Q2G099	VGDYUENRI	SAOUHSC_00722	Para-aminobenzoate synthase, glutamine amidotransferase, component II, putative	no	Enzyme		2.26415	+	1.40472		0.9133		0.182311			2.38565	2.14264	1.23646	1.57299	0.91173	0.914871	0.182819	0.181802
Q2FXB7_C50	Q2FXB7	IIUGILQQDSGEIK	SAOUHSC_01948	ABC transporter domain protein	no	not assigned		2.24007		2.12606	+	1.50991		0.601519			2.4448	2.03534	2.06912	2.18301	1.44964	1.57017	0.657366	0.545672
Q2G2N4_C17	Q2G2N4	TLNNNVVVUTNNDQEVILIGK	glcT	Protein GlcT	no	Gene expression and Nucleic acid binding		2.23072	+					0.785635			2.25761	2.20383					0.686164	0.885106
Q2FYQ9_C23	Q2FYQ9	GFNYYQSEUVINLK	SAOUHSC_01376	Uncharacterized protein	no	not assigned		2.23064		2.29227	+	1.06518		0.543824			2.45512	2.00615	2.28682	2.29772	0.886511	1.24385	0.557778	0.529871
Q2G0L9_C109	Q2G0L9	GGUSGSLMNLLQQSNFNHR	tadA	tRNA-specific adenosine deaminase	no	Gene expression and Nucleic acid binding		2.22652	+	1.18581		0.796097		0.645084			2.39724	2.0558	1.12108	1.25054	0.838589	0.753605	0.793623	0.496546
Q2FY52_C175	Q2FY52	LPFVUVIINNK	SAOUHSC_01613	2-oxoisovalerate dehydrogenase, E1 component, alpha subunit, putative	no	Enzyme		2.22083	+	2.08927	+	1.39709		0.500488			2.3257	2.11597	1.9549	2.22364	1.34761	1.44657	0.53057	0.470407
Q2G1K9_C493	Q2G1K9	VMIVUDPGMVEFGYTK	SAOUHSC_00113	Aldehyde-alcohol dehydrogenase	no	Enzyme		2.22018	+	1.65955		1.0533		0.555496			2.35935	2.081	1.71778	1.60132	1.13685	0.969749	0.603881	0.50711
Q2G012_C232	Q2G012	INHFUVVPQINSFK	emp	Extracellular matrix protein-binding protein emp	no	not assigned		2.2156	+					0.592733			2.33036	2.10084					0.681404	0.504061
Q2G1Z3_C260	Q2G1Z3	TGKPLLVTYDLUR	SAOUHSC_00652	Iron compound ABC transporter, ATP-binding protein	no	not assigned		2.21307	+	1.30159		0.718799		0.340966			2.36718	2.05897	1.34317	1.26002	0.794336	0.643263	0.289834	0.392098
Q2FXW5_C341	Q2FXW5	SPFDFUGLVLDYNEDTK	SAOUHSC_01716	Uncharacterized protein	no	Enzyme		2.20767	+	1.79424		1.09016		0.411763			2.34869	2.06664	1.81828	1.77019	1.04886	1.13146	0.474089	0.349437
Q2FWJ6_C25	Q2FWJ6	HUAYFNKR	SAOUHSC_02296	Protein SprT-like	no	not assigned		2.20152	+					0.247251			2.31368	2.08936					0.274172	0.22033
Q2FV10_C380	Q2FV10	DGLFFEPTVITNUDTSMR	SAOUHSC_02933	Betaine aldehyde dehydrogenase	no	Enzyme		2.19542	+	1.2264		0.75008		0.368775			2.29524	2.09561	1.17332	1.27947	0.695281	0.80488	0.461439	0.27611
Q2G0T5_C493	Q2G0T5	SSIESVVUNIVNK	dnaX	DNA polymerase III subunit gamma/tau	yes	Gene expression and Nucleic acid binding		2.19437	+	2.37127		1.00064		0.365898			2.33525	2.05349	2.89297	1.84956	1.29137	0.709908	0.197236	0.53456
Q2G0M8_C113	Q2G0M8	GTEAAIAYQSGFNUNMAAISAVMNK	SAOUHSC_00532	Uncharacterized protein	no	not assigned		2.19087	+	0.782301		0.444643		0.604847			2.27178	2.10995	0.799884	0.764718	0.442129	0.447157	0.645537	0.564158
Q2FX00_C94	Q2FX00	EAIEDGMPGLTIUGGYQFLGK	SAOUHSC_02106	Uncharacterized protein	yes	Enzyme		2.19019	+	1.59267		0.614521		0.187318			2.18777	2.1926	1.53192	1.65343	0.651408	0.577634	0.182946	0.191689
Q2FX96_C289	Q2FX96	ALQEUINNVKK	SAOUHSC_01981	Sensor histidine kinase, putative	no	Modulator/Scaffolding/Adaptor		2.1856	+					1.23184			2.15124	2.21996					1.38891	1.07478
Q9RQQ0_C55	Q9RQQ0	CUFDYLNNIIMMNQNK	icaR	Biofilm operon icaADBC HTH-type negative transcriptional regulator IcaR	no	Gene expression and Nucleic acid binding		2.18186	+					0.576499			2.22212	2.1416					0.562181	0.590818
Q2FXX2_C221	Q2FXX2	EVTLQADTIUVHGDGEHALLFVSK	SAOUHSC_01708	UPF0271 protein SAOUHSC_01708	no	Enzyme		2.18033	+	2.11604	+	0.857617		0.515236			2.21733	2.14332	2.1379	2.09417	1.36938	0.345851	0.602843	0.427629
Q2FYP0_C224	Q2FYP0	VTATUAR	asd	Aspartate-semialdehyde dehydrogenase	no	Enzyme	Functional site	2.17917	+	1.30174		0.957827		0.899144			2.19997	2.15837	1.44578	1.15769	0.995665	0.919988	0.958731	0.839557
Q2G1Z8_C661	Q2G1Z8	SLLDEYREGLLVGTAUDEGELFTAVMQK	polC	DNA polymerase III PolC-type	yes	Gene expression and Nucleic acid binding		2.17648	+					0.298415			2.07204	2.28093					0.548733	0.0480967
Q2FY43_C372	Q2FY43	IESAUYTNYTIPPYYDSMVAK	SAOUHSC_01623	Acetyl-CoA carboxylase, biotin carboxylase	yes	Enzyme		2.16983	+	1.34937		0.39498		0.244321			2.17092	2.16874	1.28309	1.41565	0.492827	0.297133	0.251568	0.237074
Q2G1B9_C38	Q2G1B9	PLYMSIUAADQR	tarJ	Ribulose-5-phosphate reductase 1	yes	Enzyme	Functional site	2.16952	+	1.70663		0.558012		0.227604			2.29388	2.04515	1.68616	1.72709	0.622274	0.49375	0.213028	0.24218
Q2FZJ0_C724	Q2FZJ0	QIWEGAIAQULTTQD	purL	Phosphoribosylformylglycinamidine synthase subunit PurL	no	Enzyme		2.16599	+	1.42578		1.13705		-0.490827			2.24565	2.08634	1.60497	1.24659	1.22614	1.04796	-1.10783	0.12618
Q2G1X7_C40	Q2G1X7	CSWUDSAFTWDGSAK	queE	7-carboxy-7-deazaguanine synthase	no	Enzyme	Functional site	2.16348	+	1.91874		1.25369		0.332353			2.24775	2.07922	1.56769	2.26978	1.33067	1.17671	0.406972	0.257735
Q2G115_C306	Q2G115	QGMTAPQUAGIIHTDFER	ychF	Ribosome-binding ATPase YchF	no	Modulator/Scaffolding/Adaptor		2.15798	+	1.80402		1.13356		0.779978			2.15462	2.16134	1.86881	1.73924	1.29355	0.973575	0.80892	0.751035
Q2FZW9_C181	Q2FZW9	DAEADFNATYVSFETLLAESDFIIUTAPLTK	SAOUHSC_00866	D-isomer specific 2-hydroxyacid dehydrogenase, NAD binding domain protein	no	Enzyme		2.15014	+			1.43122		0.8701			2.2241	2.07618			1.42873	1.43371	0.848237	0.891963
Q7X2S2_C190	Q7X2S2	NIVIAUGGGGIPVIK	arcC2	Carbamate kinase 2	no	Enzyme		2.14192	+	1.21165		0.290775		0.0757034			2.24516	2.03868	1.27691	1.14639	0.359858	0.221692	0.137766	0.0136409
Q2G1C4_C315	Q2G1C4	GHEINVUTMQDIVQAFEMDLSTSWGK	tarJ'	Ribulose-5-phosphate reductase 2	no	Enzyme		2.1402	+	0.807488		0.786816		0.625697			2.18593	2.09447	0.923263	0.691713	0.796349	0.777283	0.636543	0.614851
Q2FZU5_C111	Q2FZU5	GGIVUDPR	SAOUHSC_00895	Glutamate dehydrogenase	no	Enzyme		2.13538	+	1.52874		0.873735		0.653388			2.20923	2.06153	1.55611	1.50136	1.06095	0.686523	0.725087	0.581689
Q53727_C456	Q53727	VTQEULNFYELIQSLIK	pcrA	ATP-dependent DNA helicase PcrA	yes	Gene expression and Nucleic acid binding		2.11707	+	1.70806		1.53836		1.09564			2.12347	2.11066	1.6059	1.81022	1.44194	1.63478	1.22552	0.965766
Q2FWG1_C215	Q2FWG1	HTHGTGUTFSAVITAELAK	SAOUHSC_02330	Phosphomethylpyrimidine kinase	no	Enzyme		2.11696	+	-0.24895		0.276172		0.871104			2.22129	2.01264	0.176323	-0.674222	0.445727	0.106616	1.01721	0.724999
Q2FZR5_C173	Q2FZR5	IVIATALAUEPK	SAOUHSC_00925	Uncharacterized protein	no	not assigned		2.10086	+					0.680657			2.2087	1.99302					0.850959	0.510354
Q2G1S1_C33	Q2G1S1	VDMIAUEDTR	rsmI	Ribosomal RNA small subunit methyltransferase I	no	Gene expression and Nucleic acid binding		2.09683	+	1.72256		0.356463		0.321869			2.25699	1.93667	1.70186	1.74326	1.2246	-0.51167	0.437775	0.205962
Q2G1D7_C36	Q2G1D7	CLYUHNPDTWK	pflA	Pyruvate formate-lyase-activating enzyme	no	Enzyme	Functional site	2.09626	+	1.95749		1.30915		0.242931			2.18123	2.01128	2.08957	1.82542	1.50208	1.11623	0.404794	0.0810669
Q2FY55_C52	Q2FY55	QDGTTLVMINSVUGCAGGIAR	SAOUHSC_01610	UPF0403 protein SAOUHSC_01610	no	not assigned		2.0893	+	1.537		0.155164		0.153122			2.18755	1.99106	1.54577	1.52822	0.254715	0.0556122	0.190678	0.115566
Q2FVL8_C325	Q2FVL8	VSGUDLYSAGQIVENAEIK	SAOUHSC_02684	Assimilatory nitrite reductase [NAD(P)H], large subunit, putative	no	Enzyme		2.0875	+	1.34835		0.535529		0.305693			2.16244	2.01257	1.40681	1.28989	0.622368	0.44869	0.379954	0.231432
Q2G0D6_C190	Q2G0D6	DIYESMEEIADKUQIVANNFETIIMK	SAOUHSC_00669	Uncharacterized protein	no	not assigned		2.08446	+	1.81594		1.40431		0.984661			2.18756	1.98135	1.92293	1.70896	1.23953	1.5691	1.09135	0.877973
Q2G255_C7	Q2G255	IGITUYPSMGGSGIIATELGIK	SAOUHSC_01475	Uncharacterized protein	no	Enzyme		2.07308	+	2.14667	+	1.36608		0.825671			2.1832	1.96296	2.20877	2.08457	1.47015	1.26201	0.888695	0.762646
Q2FZP4_C112	Q2FZP4	TLMAVDSAVMVIDUAK	prfC	Peptide chain release factor 3	no	Gene expression and Nucleic acid binding		2.06983	+	1.89919		0.813543		0.37101			2.03872	2.10094	1.84683	1.95155	0.925848	0.701239	0.506907	0.235114
Q2FZ72_C525	Q2FZ72	MVDTUAAEFESSTPYYYGTYETENESIVTDKEK	carB	Carbamoyl-phosphate synthase large chain	no	Enzyme		2.06865	+	1.75834		1.02234		-0.0139249			1.93263	2.20467	1.66129	1.85539	0.978342	1.06633	-0.0523114	0.0244615
Q2G1E6_C34	Q2G1E6	VENVEMIAFUDVDISK	SAOUHSC_00179	Uncharacterized protein	no	Enzyme		2.067	+					0.751319			2.1148	2.0192					0.664938	0.837701
Q2G0D6_C152	Q2G0D6	EFETNUDGILR	SAOUHSC_00669	Uncharacterized protein	no	not assigned		2.05937	+	1.34704		0.89946		0.702427			2.11772	2.00102	1.34726	1.34683	0.943423	0.855496	0.754118	0.650736
Q2FXW9_C234	Q2FXW9	IATVUKFDLPK	SAOUHSC_01711	Uncharacterized protein	no	not assigned		2.05108	+	1.30562		0.664281		0.332003			2.18412	1.91804	1.34443	1.26682	0.637564	0.690998	0.314755	0.349252
Q2FV10_C289	Q2FV10	NPNIIFDDADFELAVDQALNGGYFHAGQVUSAGSR	SAOUHSC_02933	Betaine aldehyde dehydrogenase	no	Enzyme		2.05037	+	1.04785		0.509216		0.517344			2.02233	2.0784	1.02326	1.07245	0.818932	0.1995	0.407081	0.627607
Q2FVP8_C265	Q2FVP8	LDMHDDUR	SAOUHSC_02654	Ferredoxin--NADP reductase	no	Enzyme		2.04866	+	0.617822				0.0441952			2.09653	2.00079	0.766383	0.469261			0.0754642	0.0129262
Q2FZF5_C79	Q2FZF5	VHQFSGLLVDYUEQVGAK	coaD	Phosphopantetheine adenylyltransferase	yes	Enzyme	Functional site	2.04853	+	1.16995		1.0112		0.638735			2.17482	1.92224	1.21816	1.12174	0.974309	1.0481	0.704872	0.572599
Q2G0S2_C173	Q2G0S2	DDPNINPEEUVVVSPDHGGVTR	prs	Ribose-phosphate pyrophosphokinase	yes	Enzyme		2.04748	+	0.945303		0.371813		0.294118			2.08512	2.00984	1.00774	0.882869	0.31973	0.423896	0.342478	0.245759
Q2G078_C403	Q2G078	MSNLUTEIFQLQETSIINDYGIEDEIK	SAOUHSC_00742	Ribonucleoside-diphosphate reductase	yes	Enzyme		2.04195	+	1.14775		0.402782		0.359976			2.06829	2.0156	1.25005	1.04544	0.414677	0.390888	0.410775	0.309176
Q2G2W9_C105	Q2G2W9	LVNUEYTLDK	SAOUHSC_00455	Uncharacterized protein	no	not assigned		2.0417	+			0.586073		0.230358			2.14542	1.93798			0.540622	0.631523	0.306262	0.154454
Q2FV16_C62	Q2FV16	NNAGTGHAALUELNYTVLQPDGSIDIEK	mqo	Probable malate:quinone oxidoreductase	no	Enzyme		2.04045	+	1.24395		0.384869		0.0284238			2.13534	1.94557	1.30731	1.18059	0.425137	0.344601	0.0750534	-0.0182058
Q2FXW5_C118	Q2FXW5	TGATGIIVADPLIIETUK	SAOUHSC_01716	Uncharacterized protein	no	Enzyme		2.03271	+	1.59112		0.975525		0.339037			2.12446	1.94096	1.73391	1.44834	1.02033	0.930725	0.33788	0.340194
Q2FZJ0_C522	Q2FZJ0	GMAEAUDILK	purL	Phosphoribosylformylglycinamidine synthase subunit PurL	no	Enzyme		2.02626	+	1.67619		0.635176		0.163187			2.1176	1.93493	1.68594	1.66644	0.949348	0.321004	0.235114	0.0912598
Q2G2S8_C955	Q2G2S8	SLSEHYQVLYFTUVK	SAOUHSC_01974	Uncharacterized protein	no	not assigned		2.02246	+					1.05335			2.05099	1.99393					1.23628	0.870424
Q2G039_C262	Q2G039	SQLVIAIGUTGGQHR	SAOUHSC_00787	Nucleotide-binding protein SAOUHSC_00787	no	not assigned		2.0137	+	1.05816		0.640205		0.510295			2.13668	1.89072	0.848718	1.2676	0.75745	0.52296	0.581978	0.438612
Q2G243_C378	Q2G243	AVDGLDUYIGEVGLTGEVR	radA	DNA repair protein RadA	no	Gene expression and Nucleic acid binding		2.01341	+	1.14955		0.527534		0.488744			2.04191	1.98492	1.23352	1.06557	0.679334	0.375735	0.551491	0.425996
Q2FY55_C54	Q2FY55	QDGTTLVMINSVCGUAGGIAR	SAOUHSC_01610	UPF0403 protein SAOUHSC_01610	no	not assigned		2.01224	+	1.25419		0.115894		0.0323818			2.06844	1.95604	1.43797	1.07042	0.0418359	0.189952	0.0994985	-0.0347349
Q2FZ13_C226	Q2FZ13	VVEHPDLFVETSTUTMEDFDYIIELR	SAOUHSC_01258	Uncharacterized protein	no	not assigned		2.00902	+	1.0908		0.546373		0.443446			2.04373	1.97431	1.1961	0.9855	0.595313	0.497434	0.400538	0.486354
Q2G1C4_C229	Q2G1C4	IDHAFEUVGGK	tarJ'	Ribulose-5-phosphate reductase 2	no	Enzyme		2.00475	+	1.03642		0.685469		0.117149			1.92163	2.08787	1.24926	0.823586	0.79427	0.576667	0.141956	0.0923428
Q2FYZ5_C384	Q2FYZ5	ATLESLUYQTR	glpK	Glycerol kinase	no	Enzyme		1.73301		2.7322	+			0.523868			1.81594	1.65008	2.75262	2.71178			0.55768	0.490057
Q2FYG9_C148	Q2FYG9	VAVGALUK	aroC	Chorismate synthase	no	Enzyme		1.3859		2.03005	+	1.56242		0.425795			1.36042	1.41137	2.03044	2.02966	1.52552	1.59932	0.519542	0.332049
Q2FYZ9_C21	Q2FYZ9	IKSEYQDULLFFR	mutS	DNA mismatch repair protein MutS	no	Gene expression and Nucleic acid binding				2.45025	+	1.58541		0.585083					2.50358	2.39693	1.65581	1.51501	0.607105	0.56306
Q2G1Z3_C173	Q2G1Z3	TDIIFLDEPTTYLDIUHQLEILELVQK	SAOUHSC_00652	Iron compound ABC transporter, ATP-binding protein	no	not assigned				2.23095	+	1.32146		0.787652					2.26703	2.19488	1.31846	1.32447	0.811553	0.763751
Q2FVG3_C347	Q2FVG3	QQSLAITHUYFK	SAOUHSC_02751	Carboxylic ester hydrolase	no	not assigned				2.42918	+	2.01385							2.46116	2.3972	2.27435	1.75335
Q2G098_C322	Q2G098	GIYUGAIGLLLPTEDDKMIFNIPIR	SAOUHSC_00723	Uncharacterized protein	no	Enzyme				2.67696	+	1.3237							2.6602	2.69372	1.6415	1.0059
Q2G1C4_C38	Q2G1C4	QFDVTYNNVDIYGNHVIVRPLYLSIUAADQR	tarJ'	Ribulose-5-phosphate reductase 2	no	Enzyme	Functional site			2.14243	+	0.794452							2.16806	2.1168	0.840443	0.748461
Q2G0W4_C177	Q2G0W4	SIADLLIDQVEFUDVLIINK	SAOUHSC_00410	Uncharacterized protein	no	not assigned				3.31484	+								3.39684	3.23283
Q2G0P6_C270	Q2G0P6	SLGILQNUR	mcsB	Protein-arginine kinase	no	Enzyme				2.37645	+								2.52316	2.22974

## Sheet: All cysteines
Identifier	Leading razor protein	Sequence	Gene name	Name	Essential?	GO class	Functional site	Median log2(R) 100 mM DGS		Median log2(R) 50 mM DGS		Median log2(R) 20 mM DGS		Median log2(R) 10 mM DGS			log2(R) 100 mM DGS 1	log2(R) 100 mM DGS 2	log2(R) 50 mM DGS 1	log2(R) 50 mM DGS 2	log2(R) 20 mM DGS 1	log2(R) 20 mM DGS 2	log2(R) 10 mM DGS 1	log2(R) 10 mM DGS 2
Q2FVI7_C265	Q2FVI7	SVNQIPGSGAAGGMGAALLAFUETTLTK	SAOUHSC_02723	Glycerate kinase, putative	no	Enzyme		3.43642	+	2.9724	+	2.26738	+	1.05873			3.49044	3.38239	2.84762	3.09719	2.40149	2.13327	1.08868	1.02878
Q2FZ17_C141	Q2FZ17	TADGEPVVYULDK	SAOUHSC_01254	Uncharacterized protein	no	Gene expression and Nucleic acid binding		3.14948	+	2.83529	+	2.03788	+	0.827367			3.28082	3.01814	2.93486	2.73572	2.04914	2.02662	0.93859	0.716143
Q2FY27_C252	Q2FY27	VANYIGYLUSIISVTSNPK	SAOUHSC_01646	Glucokinase, putative	no	Enzyme		2.64744	+	2.85933	+	2.02138	+	1.05317			2.78791	2.50696	2.8256	2.89305	2.0794	1.96336	1.08706	1.01927
Q2G243_C99	Q2G243	STLLLQIUASLSQK	radA	DNA repair protein RadA	no	Gene expression and Nucleic acid binding		3.43898	+	2.69035	+	1.71073		1.41028			3.5064	3.37156	2.859	2.5217	2.07902	1.34244	1.46503	1.35552
Q2G1Z4_C439	Q2G1Z4	AQSLIMGUYGIGISR	proS	Proline--tRNA ligase	yes	Gene expression and Nucleic acid binding		2.85908	+	2.80327	+	1.92197		1.12459			3.04138	2.67679	2.94613	2.6604	1.9879	1.85603	1.16137	1.0878
Q2FXM9_C8	Q2FXM9	IVUTIGPASESEEMIEK	pyk	Pyruvate kinase	yes	Enzyme		3.13889	+	2.95271	+	1.81138		0.667164			3.20521	3.07257	2.97711	2.92831	1.82385	1.79892	0.757666	0.576663
Q2G1S4_C254	Q2G1S4	MIUSSGNVDSNR	SAOUHSC_00018	Replicative DNA helicase	yes	Gene expression and Nucleic acid binding		3.3164	+	2.71085	+	1.66169		0.822697			3.47625	3.15654	2.81912	2.60258	1.675	1.64837	0.846473	0.798921
Q2G038_C250	Q2G038	QAGQPFIDYVIUSTQTFNAQVLK	SAOUHSC_00788	Gluconeogenesis factor	yes	not assigned		3.13986	+	2.66983	+	1.74976		0.940874			3.19623	3.08349	2.60345	2.73622	1.75979	1.73972	0.995159	0.886589
Q2FYG1_C250	Q2FYG1	LGADPMTFLGLGGIGDLIVTUTSTHSR	gpsA	Glycerol-3-phosphate dehydrogenase [NAD(P)+]	no	Enzyme		3.34872	+	2.78093	+	1.4907		0.717118			3.44374	3.2537	2.82087	2.74099	1.56321	1.41819	0.76757	0.666666
Q2FY27_C237	Q2FY27	AGDQFUIFITEK	SAOUHSC_01646	Glucokinase, putative	no	Enzyme		2.57867	+	2.80829	+	1.98152		0.906901			2.70026	2.45707	2.79687	2.81971	1.979	1.98404	0.981926	0.831877
Q2G112_C97	Q2G112	VFVTEVVUDSVQFLEPK	SAOUHSC_00349	Single-stranded DNA-binding protein	yes	Gene expression and Nucleic acid binding		3.71139	+	2.68718	+	1.15205		0.607907			3.82334	3.59944	2.76655	2.6078	1.18764	1.11647	0.733032	0.482783
Q2G0R0_C480	Q2G0R0	IUGLLGGR	ftsH	ATP-dependent zinc metalloprotease FtsH	no	Enzyme		2.88521	+	2.37268	+	1.58741		0.928122			3.07605	2.69437	2.42806	2.3173	1.69746	1.47737	0.93017	0.926075
Q2FXY7_C383	Q2FXY7	EFGIELIATAPSVIYQUVLR	lepA	Elongation factor 4	no	not assigned		2.80173	+	2.23115	+	1.44152		0.918108			2.87272	2.73074	2.20839	2.2539	1.45786	1.42519	0.917243	0.918974
Q2FZG9_C297	Q2FZG9	HELLILUTGSQGEPMAALSR	rnj1	Ribonuclease J 1	yes	Gene expression and Nucleic acid binding		2.84641	+	2.187	+	1.58965		0.691774			2.8789	2.81392	2.23736	2.13664	1.6052	1.57411	0.706196	0.677353
Q2FZ17_C175	Q2FZ17	EQSNHNIUYADTEIEAVNYEPR	SAOUHSC_01254	Uncharacterized protein	no	Gene expression and Nucleic acid binding		2.84926	+	2.39489	+	1.54128		0.520209			2.86726	2.83125	2.35724	2.43253	1.65883	1.42374	0.57889	0.461529
Q2FXX2_C98	Q2FXX2	NIDISNDEIYNLMIYQLGALQGFUR	SAOUHSC_01708	UPF0271 protein SAOUHSC_01708	no	Enzyme		2.39306	+	2.12229	+	1.49954		0.901574			2.37801	2.40811	2.15306	2.09152	1.61321	1.38588	1.01471	0.788435
Q2G084_C36	Q2G084	NINQGIGEVTTALSSIUK	SAOUHSC_00736	Putative lipid kinase SAOUHSC_00736	no	Enzyme		2.27654	+	2.08596	+	1.5675		0.936635			2.20914	2.34395	2.19739	1.97453	1.60587	1.52912	1.02921	0.844064
Q2FW16_C84	Q2FW16	FDENAUVIIR	rplN	50S ribosomal protein L14	yes	Modulator/Scaffolding/Adaptor		2.49023	+	2.22955	+	1.5146		0.499871			2.5553	2.42516	2.24647	2.21263	1.6291	1.4001	0.513491	0.486251
Q2FXM9_C410	Q2FXM9	QUSIVWGVQPVVK	pyk	Pyruvate kinase	yes	Enzyme		2.72772	+	2.2288	+	1.15517		0.516335			2.77853	2.67691	2.33528	2.12233	1.13887	1.17147	0.592775	0.439894
Q2FZG9_C191	Q2FZG9	MAQLGEEGVLULLSDSTNSLVPDFTLSER	rnj1	Ribonuclease J 1	yes	Gene expression and Nucleic acid binding		2.69769	+	2.06068	+	1.10968		0.609804			2.79335	2.60203	2.10507	2.01628	1.14156	1.07779	0.648465	0.571143
Q2G255_C7	Q2G255	IGITUYPSMGGSGIIATELGIK	SAOUHSC_01475	Uncharacterized protein	no	Enzyme		2.07308	+	2.14667	+	1.36608		0.825671			2.1832	1.96296	2.20877	2.08457	1.47015	1.26201	0.888695	0.762646
Q2FY52_C175	Q2FY52	LPFVUVIINNK	SAOUHSC_01613	2-oxoisovalerate dehydrogenase, E1 component, alpha subunit, putative	no	Enzyme		2.22083	+	2.08927	+	1.39709		0.500488			2.3257	2.11597	1.9549	2.22364	1.34761	1.44657	0.53057	0.470407
Q2G1D7_C29	Q2G1D7	YILFTQGULLR	pflA	Pyruvate formate-lyase-activating enzyme	no	Enzyme	Functional site	2.60382	+	2.17801	+	0.989585		0.341424			2.69977	2.50787	2.2532	2.10283	1.04348	0.935686	0.394075	0.288772
Q2FXX2_C221	Q2FXX2	EVTLQADTIUVHGDGEHALLFVSK	SAOUHSC_01708	UPF0271 protein SAOUHSC_01708	no	Enzyme		2.18033	+	2.11604	+	0.857617		0.515236			2.21733	2.14332	2.1379	2.09417	1.36938	0.345851	0.602843	0.427629
Q2G1T3_C54	Q2G1T3	ATNPEQLFAAGYASUFNGAFDLILK	SAOUHSC_00831	Organic hydroperoxide resistance protein-like	no	not assigned		2.71547	+	2.46296	+	0.0431684		0.00352933			2.78432	2.64662	2.48579	2.44013	0.0657102	0.0206267	0.00518438	0.00187429
Q2G115_C101	Q2G115	EVDAIUQVVR	ychF	Ribosome-binding ATPase YchF	no	Modulator/Scaffolding/Adaptor		3.28821	+	3.07882		2.44114		1.55738			3.37962	3.1968	3.44784	2.7098	2.81013	2.07214	1.59431	1.52045
O07325_C203	O07325	ELGAUVIDIGEDVTQVAFYER	ftsA	Cell division protein FtsA	yes	not assigned		2.62543		2.35766	+	1.72659		0.934812			2.89577	2.3551	2.48872	2.2266	1.75198	1.70119	0.904966	0.964657
Q2G1K9_C602	Q2G1K9	IGMPENATFIUIPTTSGTGSEVTPFAVITDSETNVK	SAOUHSC_00113	Aldehyde-alcohol dehydrogenase	no	Enzyme		2.53509	+	1.7941		1.34714		1.03043			2.59335	2.47682	1.87054	1.71765	1.42524	1.26903	1.09909	0.961771
Q2FX19_C215	Q2FX19	ALELMUR	SAOUHSC_02087	Conserved hypothetical phage protein	no	not assigned		2.79096	+			2.31471		1.58036			2.8868	2.69513			2.7801	1.84932	1.62293	1.53779
Q2FY04_C100	Q2FY04	ELUDDDMPVYMTNHK	SAOUHSC_01670	Cytidine deaminase	no	Enzyme		2.76784	+	1.25539		1.45157		1.05418			2.78668	2.749	1.23518	1.2756	1.42546	1.47768	1.07259	1.03576
Q2FXB7_C50	Q2FXB7	IIUGILQQDSGEIK	SAOUHSC_01948	ABC transporter domain protein	no	not assigned		2.24007		2.12606	+	1.50991		0.601519			2.4448	2.03534	2.06912	2.18301	1.44964	1.57017	0.657366	0.545672
Q53727_C456	Q53727	VTQEULNFYELIQSLIK	pcrA	ATP-dependent DNA helicase PcrA	yes	Gene expression and Nucleic acid binding		2.11707	+	1.70806		1.53836		1.09564			2.12347	2.11066	1.6059	1.81022	1.44194	1.63478	1.22552	0.965766
Q2G0D6_C190	Q2G0D6	DIYESMEEIADKUQIVANNFETIIMK	SAOUHSC_00669	Uncharacterized protein	no	not assigned		2.08446	+	1.81594		1.40431		0.984661			2.18756	1.98135	1.92293	1.70896	1.23953	1.5691	1.09135	0.877973
Q2FZ59_C30	Q2FZ59	AVEUYGIVGMASR	SAOUHSC_01192	Uncharacterized protein	no	not assigned		2.35865	+	1.88041		1.13504		0.832889			2.49805	2.21925	1.75826	2.00256	1.2372	1.03288	0.882447	0.783331
Q2FYQ9_C23	Q2FYQ9	GFNYYQSEUVINLK	SAOUHSC_01376	Uncharacterized protein	no	not assigned		2.23064		2.29227	+	1.06518		0.543824			2.45512	2.00615	2.28682	2.29772	0.886511	1.24385	0.557778	0.529871
Q2FVI7_C80	Q2FVI7	YTVIVNDPLMRPIEAUYAR	SAOUHSC_02723	Glycerate kinase, putative	no	Enzyme		2.45117	+	1.85872		1.17575		0.636441			2.54866	2.35369	1.89406	1.82338	1.18878	1.16273	0.649202	0.62368
Q2FUW0_C139	Q2FUW0	ESPVHFEUEYVQTIR	SAOUHSC_02991	Uncharacterized protein	no	not assigned		2.69156	+	2.20616		0.886248		0.278122			2.8036	2.57952	2.45141	1.96092	0.89538	0.877116	0.314233	0.242012
Q2FVI4_C61	Q2FVI4	NNGDLAGILGLUIPELDGK	SAOUHSC_02726	Positive transcriptional activator, putative	no	not assigned		2.60457	+	1.44213		0.992668		1.01958			2.73099	2.47814	1.23616	1.6481	1.2634	0.721941	1.05388	0.985282
Q2FVV9_C386	Q2FVV9	QVIGTNNVDNUSR	SAOUHSC_02582	Putative formate dehydrogenase SAOUHSC_02582	no	Enzyme		2.57191	+	1.90733		0.823172		0.68803			2.64674	2.49708	1.94972	1.86493	1.14137	0.504976	0.674732	0.701327
Q2G0T5_C493	Q2G0T5	SSIESVVUNIVNK	dnaX	DNA polymerase III subunit gamma/tau	yes	Gene expression and Nucleic acid binding		2.19437	+	2.37127		1.00064		0.365898			2.33525	2.05349	2.89297	1.84956	1.29137	0.709908	0.197236	0.53456
Q2FVT8_C225	Q2FVT8	VNUVAPGPFWSPLQISGGQPQSK	SAOUHSC_02604	Uncharacterized protein	no	Enzyme		2.38476	+	1.92523		1.09197		0.522423			2.51311	2.25641	2.0403	1.81016	1.14698	1.03696	0.566961	0.477885
Q2G164_C62	Q2G164	AYVLNEDYPIVUIGAANVDRK	SAOUHSC_00291	PfkB family carbohydrate kinase family, putative	no	Enzyme		2.92258	+	2.04052				0.958371			2.98932	2.85583	1.77151	2.30953			1.01935	0.897395
Q2FZ31_C225	Q2FZ31	YFEGUMPFEVMAER	trmFO	Methylenetetrahydrofolate--tRNA-(uracil-5-)-methyltransferase TrmFO	no	Gene expression and Nucleic acid binding		2.59067	+	1.82387		1.07272		0.417006			2.61816	2.56319	1.81262	1.83512	1.12247	1.02297	0.502081	0.33193
Q2FV62_C235	Q2FV62	GAVFVNUAR	SAOUHSC_02875	D-lactate dehydrogenase, putative	no	Enzyme		2.49806	+	1.54743		1.05591		0.774279			2.57311	2.42301	1.4897	1.60516	1.12473	0.987103	0.797179	0.751378
Q2G115_C306	Q2G115	QGMTAPQUAGIIHTDFER	ychF	Ribosome-binding ATPase YchF	no	Modulator/Scaffolding/Adaptor		2.15798	+	1.80402		1.13356		0.779978			2.15462	2.16134	1.86881	1.73924	1.29355	0.973575	0.80892	0.751035
Q2G1J0_C290	Q2G1J0	SANIILDDANLDLAVEGIQLGILFNQGEVUSAGSR	aldA	Putative aldehyde dehydrogenase AldA	no	Enzyme	Functional site	2.77266	+	1.82556				1.24995			2.82316	2.72216	1.85408	1.79705			1.30153	1.19837
Q2G1K9_C258	Q2G1K9	TFDNGMIUASEQVVVIDK	SAOUHSC_00113	Aldehyde-alcohol dehydrogenase	no	Enzyme		2.48489	+	1.99162		0.86018		0.380611			2.58879	2.38099	1.92239	2.06084	1.03689	0.683474	0.41956	0.341663
Q2FZR9_C220	Q2FZR9	ALSTNDDIETAUR	fabF	3-oxoacyl-[acyl-carrier-protein] synthase 2	yes	Enzyme		2.74739	+	1.90738		0.684275		0.338406			2.88131	2.61346	1.91938	1.89538	0.742437	0.626112	0.374288	0.302524
Q2G1X7_C40	Q2G1X7	CSWUDSAFTWDGSAK	queE	7-carboxy-7-deazaguanine synthase	no	Enzyme	Functional site	2.16348	+	1.91874		1.25369		0.332353			2.24775	2.07922	1.56769	2.26978	1.33067	1.17671	0.406972	0.257735
Q2G1D7_C36	Q2G1D7	CLYUHNPDTWK	pflA	Pyruvate formate-lyase-activating enzyme	no	Enzyme	Functional site	2.09626	+	1.95749		1.30915		0.242931			2.18123	2.01128	2.08957	1.82542	1.50208	1.11623	0.404794	0.0810669
Q2FWY9_C186	Q2FWY9	QPAAYUGVVGMK	gatA	Glutamyl-tRNA(Gln) amidotransferase subunit A	yes	Enzyme		2.57081	+	1.62428		0.975512		0.434007			2.65567	2.48594	1.77396	1.47461	1.00999	0.941031	0.573267	0.294748
Q2G0I6_C304	Q2G0I6	YLUDIAEK	SAOUHSC_00579	Phosphomevalonate kinase	yes	Enzyme		2.45928	+	1.53703		0.854887		0.738681			2.52185	2.39671	1.54389	1.53017	1.10499	0.604785	0.79452	0.682843
Q2FY71_C35	Q2FY71	AEQIIDUAVENGITYFDTADMYDK	SAOUHSC_01594	Uncharacterized protein	no	not assigned		2.31147	+	1.65005		0.869617		0.676568			2.32792	2.29502	1.8004	1.49971	0.800058	0.939176	0.712821	0.640315
Q2FXW5_C341	Q2FXW5	SPFDFUGLVLDYNEDTK	SAOUHSC_01716	Uncharacterized protein	no	Enzyme		2.20767	+	1.79424		1.09016		0.411763			2.34869	2.06664	1.81828	1.77019	1.04886	1.13146	0.474089	0.349437
Q2G1K9_C493	Q2G1K9	VMIVUDPGMVEFGYTK	SAOUHSC_00113	Aldehyde-alcohol dehydrogenase	no	Enzyme		2.22018	+	1.65955		1.0533		0.555496			2.35935	2.081	1.71778	1.60132	1.13685	0.969749	0.603881	0.50711
Q2G0S3_C100	Q2G0S3	EGTTIVVUGDTPLITK	glmU	Bifunctional protein GlmU	yes	Enzyme	Functional site	2.3352	+	1.62699		0.913703		0.59797			2.44287	2.22753	1.64598	1.608	1.1236	0.70381	0.624288	0.571652
Q2FYG9_C148	Q2FYG9	VAVGALUK	aroC	Chorismate synthase	no	Enzyme		1.3859		2.03005	+	1.56242		0.425795			1.36042	1.41137	2.03044	2.02966	1.52552	1.59932	0.519542	0.332049
Q2FZR9_C165	Q2FZR9	GPNGATVTAUATGTNSIGEAFK	fabF	3-oxoacyl-[acyl-carrier-protein] synthase 2	yes	Enzyme	Functional site	3.17486	+	1.72282		0.361182		0.126171			3.26872	3.081	1.71559	1.73005	0.33754	0.384823	0.174279	0.0780633
Q2G0Y9_C176	Q2G0Y9	LEEAGLTVSSLUK	xpt	Xanthine phosphoribosyltransferase	no	Enzyme		2.32853	+	1.61978		0.901782		0.522605			2.39078	2.26628	1.6769	1.56267	0.893906	0.909658	0.519341	0.525868
Q2FYP0_C224	Q2FYP0	VTATUAR	asd	Aspartate-semialdehyde dehydrogenase	no	Enzyme	Functional site	2.17917	+	1.30174		0.957827		0.899144			2.19997	2.15837	1.44578	1.15769	0.995665	0.919988	0.958731	0.839557
Q2FZ04_C50	Q2FZ04	AAANIGLEPEEVAIITGIGUSGR	SAOUHSC_01267	Uncharacterized protein	no	Enzyme		2.30728	+	1.59458		0.908126		0.425871			2.27522	2.33934	1.69131	1.49784	0.917928	0.898324	0.569005	0.282736
Q2G1G4_C269	Q2G1G4	FVALNYHAILDUITQSK	SAOUHSC_00160	Uncharacterized protein	no	Gene expression and Nucleic acid binding		2.39186	+	0.737267		1.19489		0.904338			2.42884	2.35488	1.46404	0.0104934	1.1689	1.22089	0.877901	0.930775
Q2FVV9_C390	Q2FVV9	YUQAPATK	SAOUHSC_02582	Putative formate dehydrogenase SAOUHSC_02582	no	Enzyme		2.36066	+	1.55719		0.838868		0.460336			2.42164	2.29968	1.58866	1.52572	0.854395	0.823342	0.48419	0.436482
Q2FY27_C185	Q2FY27	SGUIETVASATGVVNLVNFYYPK	SAOUHSC_01646	Glucokinase, putative	no	Enzyme		2.29274	+	1.46404		0.771729		0.668951			2.2998	2.28567	1.57046	1.35761	0.851119	0.692338	0.704518	0.633385
Q2FZU5_C111	Q2FZU5	GGIVUDPR	SAOUHSC_00895	Glutamate dehydrogenase	no	Enzyme		2.13538	+	1.52874		0.873735		0.653388			2.20923	2.06153	1.55611	1.50136	1.06095	0.686523	0.725087	0.581689
Q2FZP4_C112	Q2FZP4	TLMAVDSAVMVIDUAK	prfC	Peptide chain release factor 3	no	Gene expression and Nucleic acid binding		2.06983	+	1.89919		0.813543		0.37101			2.03872	2.10094	1.84683	1.95155	0.925848	0.701239	0.506907	0.235114
Q2G0B0_C183	Q2G0B0	QLGMIUASIPTYK	SAOUHSC_00695	Uncharacterized protein	no	not assigned		2.80418	+			1.42444		0.791561			2.87468	2.73368		1.73178	1.48017	1.36871	0.991826	0.591296
Q2G0D6_C152	Q2G0D6	EFETNUDGILR	SAOUHSC_00669	Uncharacterized protein	no	not assigned		2.05937	+	1.34704		0.89946		0.702427			2.11772	2.00102	1.34726	1.34683	0.943423	0.855496	0.754118	0.650736
Q2FYZ5_C384	Q2FYZ5	ATLESLUYQTR	glpK	Glycerol kinase	no	Enzyme		1.73301		2.7322	+			0.523868			1.81594	1.65008	2.75262	2.71178			0.55768	0.490057
Q2FXW5_C118	Q2FXW5	TGATGIIVADPLIIETUK	SAOUHSC_01716	Uncharacterized protein	no	Enzyme		2.03271	+	1.59112		0.975525		0.339037			2.12446	1.94096	1.73391	1.44834	1.02033	0.930725	0.33788	0.340194
Q2G1D8_C691	Q2G1D8	NLTSMLDGYAMQUGHHLNINVFNR	pflB	Formate acetyltransferase	no	Enzyme		2.44882	+	1.54199		0.531205		0.411872			2.5888	2.30883	1.60274	1.48125	0.58111	0.481299	0.477781	0.345964
Q2G0I6_C324	Q2G0I6	TSGAGGGDUGITIINK	SAOUHSC_00579	Phosphomevalonate kinase	yes	Enzyme		2.47277	+	1.4886		0.566589		0.391359			2.49452	2.45101	1.57038	1.40683	0.63519	0.497988	0.361943	0.420775
Q2G1K9_C844	Q2G1K9	MAELAFEDQUTTANPK	SAOUHSC_00113	Aldehyde-alcohol dehydrogenase	no	Enzyme		2.38005	+	1.48239		0.661641		0.374845			2.45694	2.30317	1.48918	1.4756	0.715893	0.60739	0.422233	0.327457
Q2FXI5_C317	Q2FXI5	ANIGIPTAVIGVUAR	SAOUHSC_01861	Uncharacterized protein	no	Enzyme	Functional site	4.01014	+					0.880077			3.95401	4.06626					1.0092	0.750949
Q2FZF5_C79	Q2FZF5	VHQFSGLLVDYUEQVGAK	coaD	Phosphopantetheine adenylyltransferase	yes	Enzyme	Functional site	2.04853	+	1.16995		1.0112		0.638735			2.17482	1.92224	1.21816	1.12174	0.974309	1.0481	0.704872	0.572599
Q2G0L9_C109	Q2G0L9	GGUSGSLMNLLQQSNFNHR	tadA	tRNA-specific adenosine deaminase	no	Gene expression and Nucleic acid binding		2.22652	+	1.18581		0.796097		0.645084			2.39724	2.0558	1.12108	1.25054	0.838589	0.753605	0.793623	0.496546
Q2FZ72_C525	Q2FZ72	MVDTUAAEFESSTPYYYGTYETENESIVTDKEK	carB	Carbamoyl-phosphate synthase large chain	no	Enzyme		2.06865	+	1.75834		1.02234		-0.0139249			1.93263	2.20467	1.66129	1.85539	0.978342	1.06633	-0.0523114	0.0244615
Q2G099_C193	Q2G099	VGDYUENRI	SAOUHSC_00722	Para-aminobenzoate synthase, glutamine amidotransferase, component II, putative	no	Enzyme		2.26415	+	1.40472		0.9133		0.182311			2.38565	2.14264	1.23646	1.57299	0.91173	0.914871	0.182819	0.181802
Q2FZU1_C116	Q2FZU1	TNSVGIAHGUTGK	argG	Argininosuccinate synthase	no	Enzyme	Functional site	2.36125	+	1.42022		0.550633		0.35643			2.45623	2.26626	1.48176	1.35868	0.620586	0.480679	0.361526	0.351335
Q2FZ66_C120	Q2FZ66	HDYGNSVUVTTQVGCR	rlmN	Probable dual-specificity RNA methyltransferase RlmN	no	Gene expression and Nucleic acid binding		2.73606	+			1.18822		0.757918			2.84386	2.62826			1.01528	1.36115	0.759582	0.756255
Q2G1B9_C38	Q2G1B9	PLYMSIUAADQR	tarJ	Ribulose-5-phosphate reductase 1	yes	Enzyme	Functional site	2.16952	+	1.70663		0.558012		0.227604			2.29388	2.04515	1.68616	1.72709	0.622274	0.49375	0.213028	0.24218
Q2G1Z8_C1030	Q2G1Z8	GUTGVKR	polC	DNA polymerase III PolC-type	yes	Gene expression and Nucleic acid binding		2.40775	+	1.33768		0.638749		0.253048			2.52399	2.29152	1.52552	1.14984	0.724825	0.552672	0.323658	0.182438
Q2FYZ9_C21	Q2FYZ9	IKSEYQDULLFFR	mutS	DNA mismatch repair protein MutS	no	Gene expression and Nucleic acid binding				2.45025	+	1.58541		0.585083					2.50358	2.39693	1.65581	1.51501	0.607105	0.56306
Q2FX00_C94	Q2FX00	EAIEDGMPGLTIUGGYQFLGK	SAOUHSC_02106	Uncharacterized protein	yes	Enzyme		2.19019	+	1.59267		0.614521		0.187318			2.18777	2.1926	1.53192	1.65343	0.651408	0.577634	0.182946	0.191689
Q2G1Z3_C260	Q2G1Z3	TGKPLLVTYDLUR	SAOUHSC_00652	Iron compound ABC transporter, ATP-binding protein	no	not assigned		2.21307	+	1.30159		0.718799		0.340966			2.36718	2.05897	1.34317	1.26002	0.794336	0.643263	0.289834	0.392098
Q2FZC6_C72	Q2FZC6	MLVIAUNTATAVALEYLQK	murI	Glutamate racemase	yes	Enzyme	Functional site	2.8514	+			0.971538		0.727511			2.97677	2.72602			1.13086	0.812211	0.720366	0.734655
Q2FV10_C380	Q2FV10	DGLFFEPTVITNUDTSMR	SAOUHSC_02933	Betaine aldehyde dehydrogenase	no	Enzyme		2.19542	+	1.2264		0.75008		0.368775			2.29524	2.09561	1.17332	1.27947	0.695281	0.80488	0.461439	0.27611
Q2FZJ0_C522	Q2FZJ0	GMAEAUDILK	purL	Phosphoribosylformylglycinamidine synthase subunit PurL	no	Enzyme		2.02626	+	1.67619		0.635176		0.163187			2.1176	1.93493	1.68594	1.66644	0.949348	0.321004	0.235114	0.0912598
Q2G1K9_C431	Q2G1K9	VLVNTPSAVGGIGDMYNELIPSLTLGUGSYGR	SAOUHSC_00113	Aldehyde-alcohol dehydrogenase	no	Enzyme		2.28669	+	1.50105		0.518722		0.192833			2.2584	2.31499	1.55341	1.44869	0.557386	0.480058	0.244887	0.140779
Q2G1S1_C33	Q2G1S1	VDMIAUEDTR	rsmI	Ribosomal RNA small subunit methyltransferase I	no	Gene expression and Nucleic acid binding		2.09683	+	1.72256		0.356463		0.321869			2.25699	1.93667	1.70186	1.74326	1.2246	-0.51167	0.437775	0.205962
P0A0Q0_C222	P0A0Q0	VGKEDFTSFUQLNELTAVVMDYEDEEKVETIK	lacR	Lactose phosphotransferase system repressor	no	Gene expression and Nucleic acid binding		2.37451	+			1.11579		1.00208			2.55238	2.19664			1.22002	1.01157	0.853916	1.15023
Q2FZW9_C181	Q2FZW9	DAEADFNATYVSFETLLAESDFIIUTAPLTK	SAOUHSC_00866	D-isomer specific 2-hydroxyacid dehydrogenase, NAD binding domain protein	no	Enzyme		2.15014	+			1.43122		0.8701			2.2241	2.07618			1.42873	1.43371	0.848237	0.891963
Q2FVG3_C347	Q2FVG3	QQSLAITHUYFK	SAOUHSC_02751	Carboxylic ester hydrolase	no	not assigned				2.42918	+	2.01385							2.46116	2.3972	2.27435	1.75335
Q2G1C4_C315	Q2G1C4	GHEINVUTMQDIVQAFEMDLSTSWGK	tarJ'	Ribulose-5-phosphate reductase 2	no	Enzyme		2.1402	+	0.807488		0.786816		0.625697			2.18593	2.09447	0.923263	0.691713	0.796349	0.777283	0.636543	0.614851
Q2FXW9_C234	Q2FXW9	IATVUKFDLPK	SAOUHSC_01711	Uncharacterized protein	no	not assigned		2.05108	+	1.30562		0.664281		0.332003			2.18412	1.91804	1.34443	1.26682	0.637564	0.690998	0.314755	0.349252
Q2G1Z3_C191	Q2G1Z3	LNQEQGUTIVMVLHDINQAIR	SAOUHSC_00652	Iron compound ABC transporter, ATP-binding protein	no	not assigned		2.34615	+	1.31932				0.68403			2.37796	2.31435	2.2781	0.360533			0.823179	0.544881
Q2G1Z3_C173	Q2G1Z3	TDIIFLDEPTTYLDIUHQLEILELVQK	SAOUHSC_00652	Iron compound ABC transporter, ATP-binding protein	no	not assigned				2.23095	+	1.32146		0.787652					2.26703	2.19488	1.31846	1.32447	0.811553	0.763751
Q2FVL8_C325	Q2FVL8	VSGUDLYSAGQIVENAEIK	SAOUHSC_02684	Assimilatory nitrite reductase [NAD(P)H], large subunit, putative	no	Enzyme		2.0875	+	1.34835		0.535529		0.305693			2.16244	2.01257	1.40681	1.28989	0.622368	0.44869	0.379954	0.231432
Q2FZJ0_C724	Q2FZJ0	QIWEGAIAQULTTQD	purL	Phosphoribosylformylglycinamidine synthase subunit PurL	no	Enzyme		2.16599	+	1.42578		1.13705		-0.490827			2.24565	2.08634	1.60497	1.24659	1.22614	1.04796	-1.10783	0.12618
Q2FZJ0_C55	Q2FZJ0	QPNFTETGIFSVMWSEHUSYK	purL	Phosphoribosylformylglycinamidine synthase subunit PurL	no	Enzyme	Functional site	2.72984	+			1.17923		0.320044			2.83609	2.62359			1.36272	0.995738	0.413702	0.226385
Q2G039_C262	Q2G039	SQLVIAIGUTGGQHR	SAOUHSC_00787	Nucleotide-binding protein SAOUHSC_00787	no	not assigned		2.0137	+	1.05816		0.640205		0.510295			2.13668	1.89072	0.848718	1.2676	0.75745	0.52296	0.581978	0.438612
Q2FVQ5_C63	Q2FVQ5	LAQPGEESSNVWNNAGTGHSALUELNYTK	mqo	Probable malate:quinone oxidoreductase	no	Enzyme		2.29061	+	1.43987		0.399877		0.0742862			2.37601	2.2052	1.54592	1.33382	0.496411	0.303342	0.109294	0.0392788
Q2G1X6_C23	Q2G1X6	AIVVFSGGQDSTTULFYAK	queC	7-cyano-7-deazaguanine synthase	no	not assigned	Functional site	3.27641	+					0.912829			3.36989	3.18293					0.846072	0.979586
Q2G243_C378	Q2G243	AVDGLDUYIGEVGLTGEVR	radA	DNA repair protein RadA	no	Gene expression and Nucleic acid binding		2.01341	+	1.14955		0.527534		0.488744			2.04191	1.98492	1.23352	1.06557	0.679334	0.375735	0.551491	0.425996
Q2G1J4_C258	Q2G1J4	VNIHQPGPGVGGHULAVDPYFIIAK	SAOUHSC_00128	Cap5O protein/UDP-N-acetyl-D-mannosaminuronic acid dehydrogenase	no	Enzyme		2.3376	+	1.3868		0.269464		0.173268			2.3981	2.27709	1.38272	1.39088	0.26292	0.276008	0.285106	0.0614306
Q2FY43_C372	Q2FY43	IESAUYTNYTIPPYYDSMVAK	SAOUHSC_01623	Acetyl-CoA carboxylase, biotin carboxylase	yes	Enzyme		2.16983	+	1.34937		0.39498		0.244321			2.17092	2.16874	1.28309	1.41565	0.492827	0.297133	0.251568	0.237074
Q2G112_C51	Q2G112	EADFINUVVFR	SAOUHSC_00349	Single-stranded DNA-binding protein	yes	Gene expression and Nucleic acid binding		2.4317	+			1.24403		0.481484			2.61037	2.25302		2.54631	1.13394	1.35411	0.670834	0.292134
Q53727_C92	Q53727	LVGDQAEVIWMSTFHSMUVR	pcrA	ATP-dependent DNA helicase PcrA	yes	Gene expression and Nucleic acid binding		2.92094	+					1.23475			3.05653	2.78534					1.28795	1.18155
Q2FV10_C289	Q2FV10	NPNIIFDDADFELAVDQALNGGYFHAGQVUSAGSR	SAOUHSC_02933	Betaine aldehyde dehydrogenase	no	Enzyme		2.05037	+	1.04785		0.509216		0.517344			2.02233	2.0784	1.02326	1.07245	0.818932	0.1995	0.407081	0.627607
Q2FZ13_C226	Q2FZ13	VVEHPDLFVETSTUTMEDFDYIIELR	SAOUHSC_01258	Uncharacterized protein	no	not assigned		2.00902	+	1.0908		0.546373		0.443446			2.04373	1.97431	1.1961	0.9855	0.595313	0.497434	0.400538	0.486354
Q2FZF5_C36	Q2FZF5	FDEIHVUVLK	coaD	Phosphopantetheine adenylyltransferase	yes	Enzyme		2.43313	+	1.24522				0.371916			2.49459	2.37167	1.09775	1.3927			0.418676	0.325156
Q2G0M8_C113	Q2G0M8	GTEAAIAYQSGFNUNMAAISAVMNK	SAOUHSC_00532	Uncharacterized protein	no	not assigned		2.19087	+	0.782301		0.444643		0.604847			2.27178	2.10995	0.799884	0.764718	0.442129	0.447157	0.645537	0.564158
Q2FXI5_C238	Q2FXI5	ASAEMIDPDVAFVVDUSPANDVK	SAOUHSC_01861	Uncharacterized protein	no	Enzyme	Functional site	2.98934	+					1.03307			2.93318	3.04551					1.1141	0.952035
Q2G098_C322	Q2G098	GIYUGAIGLLLPTEDDKMIFNIPIR	SAOUHSC_00723	Uncharacterized protein	no	Enzyme				2.67696	+	1.3237							2.6602	2.69372	1.6415	1.0059
Q2G078_C403	Q2G078	MSNLUTEIFQLQETSIINDYGIEDEIK	SAOUHSC_00742	Ribonucleoside-diphosphate reductase	yes	Enzyme		2.04195	+	1.14775		0.402782		0.359976			2.06829	2.0156	1.25005	1.04544	0.414677	0.390888	0.410775	0.309176
Q2FY55_C52	Q2FY55	QDGTTLVMINSVUGCAGGIAR	SAOUHSC_01610	UPF0403 protein SAOUHSC_01610	no	not assigned		2.0893	+	1.537		0.155164		0.153122			2.18755	1.99106	1.54577	1.52822	0.254715	0.0556122	0.190678	0.115566
Q2G1C4_C229	Q2G1C4	IDHAFEUVGGK	tarJ'	Ribulose-5-phosphate reductase 2	no	Enzyme		2.00475	+	1.03642		0.685469		0.117149			1.92163	2.08787	1.24926	0.823586	0.79427	0.576667	0.141956	0.0923428
Q2FZ13_C151	Q2FZ13	TESIVAGSVUAHK	SAOUHSC_01258	Uncharacterized protein	no	not assigned		2.41724	+			0.769412		0.56956			2.50791	2.32656			0.732586	0.806238	0.593258	0.545862
Q2FVG8_C207	Q2FVG8	LADKIUIMSEGK	SAOUHSC_02744	Amino acid ABC transporter, ATP-binding protein, putative	no	not assigned		2.51357	+			0.409987		0.828225			2.49208	2.53506			1.04341	-0.223441	0.939678	0.716771
Q2G0T6_C124	Q2G0T6	AQEYSTVVVDHUFDYFEK	SAOUHSC_00441	Uncharacterized protein	no	not assigned		2.51662	+					1.21351			2.50658	2.52667					1.25471	1.1723
Q2G1S1_C43	Q2G1S1	LUNHYDIPTPLK	rsmI	Ribosomal RNA small subunit methyltransferase I	no	Gene expression and Nucleic acid binding		2.47038	+			0.816696		0.439097			2.52897	2.41178			0.802731	0.830661	0.463518	0.414677
Q7X2S2_C190	Q7X2S2	NIVIAUGGGGIPVIK	arcC2	Carbamate kinase 2	no	Enzyme		2.14192	+	1.21165		0.290775		0.0757034			2.24516	2.03868	1.27691	1.14639	0.359858	0.221692	0.137766	0.0136409
Q2FV16_C62	Q2FV16	NNAGTGHAALUELNYTVLQPDGSIDIEK	mqo	Probable malate:quinone oxidoreductase	no	Enzyme		2.04045	+	1.24395		0.384869		0.0284238			2.13534	1.94557	1.30731	1.18059	0.425137	0.344601	0.0750534	-0.0182058
Q2G0S2_C173	Q2G0S2	DDPNINPEEUVVVSPDHGGVTR	prs	Ribose-phosphate pyrophosphokinase	yes	Enzyme		2.04748	+	0.945303		0.371813		0.294118			2.08512	2.00984	1.00774	0.882869	0.31973	0.423896	0.342478	0.245759
Q2FUZ6_C38	Q2FUZ6	VILVVNTATEUIYSEQLK	SAOUHSC_02949	Glutathione peroxidase	no	Enzyme	Functional site	2.26845	+	1.27926				0.0646001			2.44186	2.09505	1.32458	1.23395			0.137897	-0.00869676
Q2FX96_C289	Q2FX96	ALQEUINNVKK	SAOUHSC_01981	Sensor histidine kinase, putative	no	Modulator/Scaffolding/Adaptor		2.1856	+					1.23184			2.15124	2.21996					1.38891	1.07478
Q2FY55_C54	Q2FY55	QDGTTLVMINSVCGUAGGIAR	SAOUHSC_01610	UPF0403 protein SAOUHSC_01610	no	not assigned		2.01224	+	1.25419		0.115894		0.0323818			2.06844	1.95604	1.43797	1.07042	0.0418359	0.189952	0.0994985	-0.0347349
Q2FYG6_C136	Q2FYG6	VHQLISESIVDVUR	SAOUHSC_01486	Heptaprenyl diphosphate syntase component II, putative	no	Enzyme		2.62007	+					0.75523			2.75726	2.48287					0.686792	0.823668
Q2FUW3_C371	Q2FUW3	EUITSVNEEYQAK	asp1	Accessory Sec system protein Asp1	no	not assigned		2.34314	+					1.00785			2.48179	2.20449					0.915865	1.09983
Q2G0W4_C177	Q2G0W4	SIADLLIDQVEFUDVLIINK	SAOUHSC_00410	Uncharacterized protein	no	not assigned				3.31484	+								3.39684	3.23283
Q2G1T3_C120	Q2G1T3	YLQMAHEFUPYSK	SAOUHSC_00831	Organic hydroperoxide resistance protein-like	no	not assigned		2.567	+	0.731881		0.00128896					2.56891	2.56509	0.797096	0.666666	-0.0600964	0.0626744
Q2G1Z8_C1254	Q2G1Z8	ENEVPDWYLDSULK	polC	DNA polymerase III PolC-type	yes	Gene expression and Nucleic acid binding		2.59457	+					0.538705			2.44509	2.74405					0.628813	0.448597
Q2G2S8_C955	Q2G2S8	SLSEHYQVLYFTUVK	SAOUHSC_01974	Uncharacterized protein	no	not assigned		2.02246	+					1.05335			2.05099	1.99393					1.23628	0.870424
Q2FXA5_C343	Q2FXA5	TSDTDITAUTWTSK	SAOUHSC_01960	Protoporphyrinogen oxidase	no	Enzyme		2.55632	+					0.502213			2.4619	2.65074					0.489978	0.514447
Q2G2N4_C17	Q2G2N4	TLNNNVVVUTNNDQEVILIGK	glcT	Protein GlcT	no	Gene expression and Nucleic acid binding		2.23072	+					0.785635			2.25761	2.20383					0.686164	0.885106
Q2FWG1_C215	Q2FWG1	HTHGTGUTFSAVITAELAK	SAOUHSC_02330	Phosphomethylpyrimidine kinase	no	Enzyme		2.11696	+	-0.24895		0.276172		0.871104			2.22129	2.01264	0.176323	-0.674222	0.445727	0.106616	1.01721	0.724999
Q2FYV2_C207	Q2FYV2	SSAISNTMIUALAQHNYELAGK	thrB	Homoserine kinase	no	Enzyme		2.55876	+					0.407934			2.51508	2.60243					0.295723	0.520146
Q2FXZ5_C82	Q2FXZ5	QNINTELPVDVTIUSGLIK	SAOUHSC_01680	Ribosomal RNA small subunit methyltransferase E	no	Gene expression and Nucleic acid binding		2.29449	+					0.648076			2.37662	2.21235					0.776609	0.519542
Q2G1C4_C38	Q2G1C4	QFDVTYNNVDIYGNHVIVRPLYLSIUAADQR	tarJ'	Ribulose-5-phosphate reductase 2	no	Enzyme	Functional site			2.14243	+	0.794452							2.16806	2.1168	0.840443	0.748461
Q2FZ17_C152	Q2FZ17	ELTUTEYQMSNGSILSAIK	SAOUHSC_01254	Uncharacterized protein	no	Gene expression and Nucleic acid binding		2.4771	+					0.455633			2.39271	2.56149					0.535754	0.375512
Q2G2W9_C105	Q2G2W9	LVNUEYTLDK	SAOUHSC_00455	Uncharacterized protein	no	not assigned		2.0417	+			0.586073		0.230358			2.14542	1.93798			0.540622	0.631523	0.306262	0.154454
Q2G1E6_C34	Q2G1E6	VENVEMIAFUDVDISK	SAOUHSC_00179	Uncharacterized protein	no	Enzyme		2.067	+					0.751319			2.1148	2.0192					0.664938	0.837701
Q2G012_C232	Q2G012	INHFUVVPQINSFK	emp	Extracellular matrix protein-binding protein emp	no	not assigned		2.2156	+					0.592733			2.33036	2.10084					0.681404	0.504061
Q2FZR5_C173	Q2FZR5	IVIATALAUEPK	SAOUHSC_00925	Uncharacterized protein	no	not assigned		2.10086	+					0.680657			2.2087	1.99302					0.850959	0.510354
Q9RQQ0_C55	Q9RQQ0	CUFDYLNNIIMMNQNK	icaR	Biofilm operon icaADBC HTH-type negative transcriptional regulator IcaR	no	Gene expression and Nucleic acid binding		2.18186	+					0.576499			2.22212	2.1416					0.562181	0.590818
Q2FVP8_C265	Q2FVP8	LDMHDDUR	SAOUHSC_02654	Ferredoxin--NADP reductase	no	Enzyme		2.04866	+	0.617822				0.0441952			2.09653	2.00079	0.766383	0.469261			0.0754642	0.0129262
Q2G1E1_C135	Q2G1E1	SLASUHDAFQPLLK	SAOUHSC_00184	Uncharacterized response regulatory protein SAOUHSC_00184	no	Gene expression and Nucleic acid binding		2.3234	+					0.369044			2.40722	2.23958					0.421479	0.316609
Q2G1D0_C379	Q2G1D0	YGMVTMUIGVGMGAAAIFEYVR	SAOUHSC_00195	Acetyl-CoA acetyltransferase, putative	no	Enzyme	Functional site	2.29997	+					0.233759			2.28724	2.31269					0.327917	0.1396
Q2G1Z8_C661	Q2G1Z8	SLLDEYREGLLVGTAUDEGELFTAVMQK	polC	DNA polymerase III PolC-type	yes	Gene expression and Nucleic acid binding		2.17648	+					0.298415			2.07204	2.28093					0.548733	0.0480967
Q2FWJ6_C25	Q2FWJ6	HUAYFNKR	SAOUHSC_02296	Protein SprT-like	no	not assigned		2.20152	+					0.247251			2.31368	2.08936					0.274172	0.22033
Q2G0P6_C270	Q2G0P6	SLGILQNUR	mcsB	Protein-arginine kinase	no	Enzyme				2.37645	+								2.52316	2.22974
Q2G1R8_C60	Q2G1R8	LMGIIISENLIEUVK	SAOUHSC_00034	Uncharacterized protein	no	Gene expression and Nucleic acid binding		2.91811		1.9633		1.19873		0.935268			3.34724	2.48898	1.96735	1.95925	1.26075	1.13672	0.938399	0.932137
Q2G1G6_C245	Q2G1G6	IIQEIUAITYDEAMALYQVSEHDVK	murQ	N-acetylmuramic acid 6-phosphate etherase	no	Enzyme		1.87928		1.62929		1.67142		0.972798			1.99077	1.76778	1.75707	1.50152	1.45244	1.89041	1.05527	0.89033
Q2FVI7_C196	Q2FVI7	VAUDVSNPLLGENGATYIYGPQK	SAOUHSC_02723	Glycerate kinase, putative	no	Enzyme		2.86826		2.16402				0.607878			2.61798	3.11854	2.50477	1.82326			0.479541	0.736215
Q2FYS0_C275	Q2FYS0	SHLVNLUK	SAOUHSC_01365	Uncharacterized protein	no	Enzyme		2.09222		1.79217		1.43214		0.259205			2.26039	1.92406	1.66607	1.91827	1.18428	1.68001	0.343237	0.175173
Q2G1H9_C1906	Q2G1H9	TITHIDUMPLTTNDKVDTTR	SAOUHSC_00144	Uncharacterized protein	no	Enzyme		3.2201				1.55845		0.695842			2.9589	3.4813			1.86896	1.24793	0.657549	0.734135
Q2G1G6_C272	Q2G1G6	VATVMGMUGISK	murQ	N-acetylmuramic acid 6-phosphate etherase	no	Enzyme		1.9875		1.65769		1.08365		0.737834			2.19696	1.77803	1.70003	1.61536	1.15666	1.01064	0.797854	0.677813
Q2G069_C224	Q2G069	QPLEYPSUGSVFQRPPGHFAGK	murB	UDP-N-acetylenolpyruvoylglucosamine reductase	yes	Enzyme	Functional site	1.95962		1.29446		1.25109		0.926022			2.08689	1.83235	1.37707	1.21184	1.36087	1.14131	1.0226	0.829447
Q2FZG9_C406	Q2FZG9	AHGETGVEUGVEEDNVFIFDIGDVLALTHDSAR	rnj1	Ribonuclease J 1	yes	Gene expression and Nucleic acid binding		2.08183		1.72624		1.0287		0.593815			1.73157	2.43208	1.78455	1.66794	1.21876	0.838648	0.675455	0.512176
Q2G146_C76	Q2G146	LMFVEADLSQDEHWDEAMKDUK	SAOUHSC_00309	Uncharacterized protein	no	Enzyme		1.97667		1.7509		0.939841		0.745591			2.0995	1.85384	1.71931	1.78249	0.982364	0.897318	0.7554	0.735782
Q2G0M6_C394	Q2G0M6	SVLSDSNLTGUIFGLTLQTK	araB	Ribulokinase	no	Enzyme		1.97737		1.57953		1.00246		0.495922			1.86148	2.09326	1.65974	1.49932	1.02226	0.982656	0.518837	0.473008
Q2FZW9_C276	Q2FZW9	DNMIQLUINNIEAVMTNQVPHTPVN	SAOUHSC_00866	D-isomer specific 2-hydroxyacid dehydrogenase, NAD binding domain protein	no	Enzyme		1.79313		1.28164		1.04776		0.772919			1.94759	1.63868	1.33794	1.22534	1.08997	1.00554	0.830823	0.715015
Q2G1K2_C101	Q2G1K2	EQPDALLILGDTNSULAAVSAK	SAOUHSC_00120	UDP-N-acetylglucosamine 2-epimerase	no	Enzyme		1.57363		1.85733		0.987684		0.378981			1.65398	1.49329	1.90319	1.81147	1.04565	0.929715	0.399116	0.358846
Q2FVL8_C725	Q2FVL8	LUGALMQYYR	SAOUHSC_02684	Assimilatory nitrite reductase [NAD(P)H], large subunit, putative	no	Enzyme		1.75015		1.53668		1.06314		0.434211			1.89894	1.60136	1.86465	1.2087	1.30334	0.822934	0.546642	0.321781
Q2FVV9_C536	Q2FVV9	FAEEUAK	SAOUHSC_02582	Putative formate dehydrogenase SAOUHSC_02582	no	Enzyme		1.65261		1.53266		1.07378		0.500233			1.73669	1.56852	1.5709	1.49442	1.13829	1.00928	0.504976	0.495491
Q2FVN3_C13	Q2FVN3	QLUFLFYVSSK	sarZ	HTH-type transcriptional regulator SarZ	no	Gene expression and Nucleic acid binding		1.95473		1.14937		0.933986		0.695172			2.06998	1.83948	1.12862	1.17012	0.722816	1.14516	0.687509	0.702835
Q2G1G4_C124	Q2G1G4	FVATNIMDAQIDAIUDVLK	SAOUHSC_00160	Uncharacterized protein	no	Gene expression and Nucleic acid binding		1.80071		1.33428		0.678696		0.881963			1.99592	1.60549	1.3471	1.32147	1.1475	0.20989	0.941482	0.822445
Q2FXY7_C431	Q2FXY7	ATMMVPNDYVGAVMELUQR	lepA	Elongation factor 4	no	not assigned		1.68572		1.26032		0.870143		0.847275			1.7899	1.58154	1.28528	1.23536	0.945683	0.794603	0.847756	0.846794
Q2FXW5_C307	Q2FXW5	INPEWLIELDKUANR	SAOUHSC_01716	Uncharacterized protein	no	Enzyme		1.97242		1.39357		0.798074		0.416298			2.13993	1.80492	1.43087	1.35626	0.836651	0.759497	0.500088	0.332507
Q2FY71_C19	Q2FY71	SGISLSELGLGUMSLGTDLK	SAOUHSC_01594	Uncharacterized protein	no	not assigned		1.86224		1.48198		0.802063		0.424965			1.95369	1.77079	1.54431	1.41965	0.899115	0.705011	0.426841	0.423089
Q2FWF5_C94	Q2FWF5	IALFAGIDKUR	fabZ	3-hydroxyacyl-[acyl-carrier-protein] dehydratase FabZ	yes	Enzyme		2.06354		1.47328		0.824187		0.210066			2.29487	1.8322	1.39665	1.54992	0.945982	0.702392	0.204516	0.215616
Q2FY32_C53	Q2FY32	LTIPEIFUK	aroK	Shikimate kinase	no	Enzyme		1.91321		1.42861		0.847784		0.379783			1.93824	1.88817	1.82863	1.0286	1.03244	0.663129	0.421897	0.337668
Q2G1X7_C148	Q2G1X7	KLDEVITQUVPSSLNLK	queE	7-carboxy-7-deazaguanine synthase	no	Enzyme		1.53292		1.54066		0.955283		0.538			1.67496	1.39089	1.608	1.47332	0.924556	0.98601	0.506703	0.569297
Q2G1C8_C317	Q2G1C8	LAMMQGNLAQAMATUAQLANMQAHGEYDEVATSTAK	SAOUHSC_00197	Uncharacterized protein	no	Enzyme		1.34911		1.85696		1.19824		0.154074			1.29555	1.40267	1.90508	1.80884	1.3467	1.04977	0.247685	0.0604625
Q2FXY7_C306	Q2FXY7	MNPMVYUGLFPIDNK	lepA	Elongation factor 4	no	not assigned		0.947993		1.64		1.1486		0.813115			0.741143	1.15484	1.81492	1.46509	1.16639	1.1308	0.977924	0.648306
Q2G2J8_C226	Q2G2J8	ALLDLUDLITVMPVER	SAOUHSC_01413	Uncharacterized protein SAOUHSC_01413	no	not assigned		1.68569		1.79071		0.750254		0.309474			1.80822	1.56316	1.89844	1.68298	0.7554	0.745108	0.40806	0.210888
Q2FZ25_C191	Q2FZ25	LNIPIVGIVDTNUDPDEIDYVIPANDDAIR	rpsB	30S ribosomal protein S2	yes	Modulator/Scaffolding/Adaptor		1.94415		1.31998		0.756161		0.464029			2.02422	1.86408	1.36222	1.27775	0.761115	0.751207	0.532864	0.395194
Q2FUY1_C233	Q2FUY1	HLFNDVUV	arcR	HTH-type transcriptional regulator ArcR	no	Gene expression and Nucleic acid binding		2.15174		1.34783		0.509952		0.422545			2.35521	1.94826	1.43787	1.2578	0.610322	0.409581	0.462366	0.382723
Q2G050_C213	Q2G050	VRGDVVEIFPASKEELUIR	SAOUHSC_00776	Excinuclease ABC, B subunit	no	Gene expression and Nucleic acid binding		1.91059		0.959951		0.92554		0.58313			1.99088	1.8303	0.91242	1.00748	0.756169	1.09491	0.654894	0.511367
Q2G1C8_C143	Q2G1C8	TUFALTEPEHGSDVAGGLETVAER	SAOUHSC_00197	Uncharacterized protein	no	Enzyme		1.98777		1.42415		0.731964		0.217665			2.10926	1.86627	1.48166	1.36664	0.730053	0.733875	0.216982	0.218347
Q2FWF6_C119	Q2FWF6	TTMSIVFEUHIYTLR	SAOUHSC_02335	Uncharacterized protein	no	not assigned		1.58517		1.24015		0.81579		0.709134			1.56608	1.60426	1.12168	1.35862	0.925999	0.70558	0.717561	0.700706
Q2FY44_C75	Q2FY44	EDGIYIDVYUALK	SAOUHSC_01622	Uncharacterized protein	no	not assigned		1.84102		1.37206		0.679548		0.445783			1.91892	1.76311	1.44969	1.29443	0.728225	0.630871	0.433814	0.457752
Q2FZV6_C284	Q2FZV6	FDMUGAANVVGIIEAASR	SAOUHSC_00879	Probable cytosol aminopeptidase	no	Enzyme		2.15284		1.74929				0.41458			1.92227	2.38341	1.38885	2.10973			0.46874	0.36042
Q2FWG0_C137	Q2FWG0	ENAIYTIAAMAPUPYIYAELAK	tenA	Aminopyrimidine aminohydrolase	no	Enzyme	Functional site	1.98846		1.31568				0.985584			1.84254	2.13439	1.2509	1.38045			0.882213	1.08896
Q2FUX5_C58	Q2FUX5	VPIDUETWIYK	argR	Arginine repressor	no	Gene expression and Nucleic acid binding		1.81		1.62192		0.605659		0.234287			1.44154	2.17846	1.62316	1.62068	0.708335	0.502983	0.311271	0.157302
Q2FZV7_C238	Q2FZV7	IATPIVAUNEK	SAOUHSC_00878	NADH dehydrogenase-like protein SAOUHSC_00878	no	Enzyme		1.77831		1.78842		0.779549		-0.0881427			1.88487	1.67175	1.84856	1.72829	0.802094	0.757003	0.026021	-0.202306
Q2G203_C37	Q2G203	IEIYSFFDPFSSDUFK	SAOUHSC_00938	UPF0413 protein SAOUHSC_00938	no	not assigned		1.7673		0.956259		0.887876		0.601394			1.67622	1.85838	1.06853	0.843984	0.731357	1.04439	0.645794	0.556993
Q2G1Z8_C1138	Q2G1Z8	TIPVDDKEVMQIFSTPESLGVTEDEILUK	polC	DNA polymerase III PolC-type	yes	Gene expression and Nucleic acid binding		2.43155		1.22657		0.547564					2.80108	2.06202	1.41219	1.04096	0.444455	0.650673
Q2FZC7_C55	Q2FZC7	ENLNVIAULMEIR	SAOUHSC_01105	Iron-sulphur subunit of succinate dehydrogenase, putative	no	not assigned		1.73432		1.3595		0.59655		0.490089			1.81187	1.65676	1.3794	1.33959	0.376523	0.816577	0.434626	0.545551
Q2G292_C238	Q2G292	GEDIGYGHTVNVPLEPYTEDASFLEUFK	SAOUHSC_01849	Uncharacterized protein	no	not assigned		1.93211		1.3069		0.44438		0.473125			2.16925	1.69497	1.42508	1.18872	0.750864	0.137897	0.548338	0.397912
Q2FW16_C41	Q2FW16	TANIGDVIVUTVK	rplN	50S ribosomal protein L14	yes	Modulator/Scaffolding/Adaptor		1.71081		1.50645		0.846198		0.0905527			1.79821	1.62341	1.52011	1.49278	0.899867	0.792529	0.109159	0.0719463
Q2G0M6_C293	Q2G0M6	DKEMTMVMGTSTUHLMLNEK	araB	Ribulokinase	no	Enzyme		3.01206						1.1298			3.25117	2.77294					1.2939	0.965692
Q2FXK3_C127	Q2FXK3	LITIADNNUMISNAVR	SAOUHSC_01831	Uncharacterized protein	no	not assigned		1.98804		1.32606		0.615682		0.195816			2.12684	1.84924	1.35693	1.29519	0.649386	0.581978	0.2806	0.111031
Q2FZ50_C95	Q2FZ50	ATIVUEPSLVIFANK	rnc	Ribonuclease 3	no	Gene expression and Nucleic acid binding		1.9306		0.813319		0.440811		0.940812			2.08797	1.77324	1.04775	0.57889	0.598175	0.283448	0.926683	0.954941
Q2FWL2_C302	Q2FWL2	LUTDNAAMIGVAGHYLYQQGR	tsaD	tRNA N6-adenosine threonylcarbamoyltransferase	yes	Enzyme	Functional site	1.83886		1.35633		0.634668		0.253245			1.88569	1.79202	1.40076	1.31191	0.648281	0.621056	0.299596	0.206893
Q2G1K9_C120	Q2G1K9	GLTYVAEPIGVIUGVTPTTNPTSTTIFK	SAOUHSC_00113	Aldehyde-alcohol dehydrogenase	no	Enzyme		1.71984		1.42473		0.643011		0.293932			1.8502	1.58948	1.48718	1.36227	0.702214	0.583808	0.371503	0.216362
Q2FWC6_C17	Q2FWC6	DILINEUIYFASK	SAOUHSC_02372	Uncharacterized protein	no	not assigned		1.54049		1.33459		0.668537		0.531919			1.5727	1.50828	1.2916	1.37757	0.921208	0.415867	0.543793	0.520045
Q2FV20_C206	Q2FV20	QLLLDGUR	SAOUHSC_02920	2-dehydropantoate 2-reductase	no	Enzyme		1.53345		1.18339		0.786821		0.538316			1.60706	1.45985	1.46011	0.90666	0.926834	0.646808	0.573181	0.503451
Q2G0Q0_C145	Q2G0Q0	VGQGVDILUK	pdxT	Pyridoxal 5'-phosphate synthase subunit PdxT	no	Enzyme		1.28073		1.24758		0.967883		0.542894			1.39435	1.1671	1.25484	1.24031	1.04886	0.886901	0.555718	0.530071
Q2FYR0_C129	Q2FYR0	LASUIDVANIDTPIK	SAOUHSC_01375	Uncharacterized protein	no	not assigned		1.76451		1.22525		0.609508		0.438381			2.05547	1.47356	1.10914	1.34136	0.578118	0.640899	0.559018	0.317744
Q2FV41_C158	Q2FV41	VNSLAYUSSK	SAOUHSC_02898	Uncharacterized protein	no	Enzyme		1.66824		1.49442		0.528441		0.338884			1.63817	1.69831	1.60208	1.38676	0.554245	0.502636	0.37829	0.299479
Q2FZJ0_C496	Q2FZJ0	NLIAVGATPLAMTDULNYGSPEK	purL	Phosphoribosylformylglycinamidine synthase subunit PurL	no	Enzyme	Functional site	1.78328		1.33381		0.769887		0.138938			1.90079	1.66578	1.29026	1.37736	0.866855	0.672919	0.161136	0.11674
Q2G2J2_C171	Q2G2J2	NLYTSGQUTYYVFDR	ssaA2	Staphylococcal secretory antigen ssaA2	yes	not assigned		1.85455		1.53509		0.322912		0.289523			2.01164	1.69746	1.68796	1.38222	0.410341	0.235482	0.337083	0.241962
Q2FUS7_C252	Q2FUS7	DWFDGKPUER	SAOUHSC_03024	UPF0176 protein SAOUHSC_03024	no	not assigned		2.07073		1.31835		0.616294		-0.0498798			2.35428	1.78718	1.54449	1.09221	0.666211	0.566377	-0.148833	0.0490731
Q2FVT8_C35	Q2FVT8	QEQEVPGLQSEMTPAPDUGETSYQGHQR	SAOUHSC_02604	Uncharacterized protein	no	Enzyme		1.85209		1.10606		0.632693		0.342302			1.97558	1.72859	1.14536	1.06675	0.670999	0.594387	0.46426	0.220343
Q2FVV7_C247	Q2FVV7	AUHETVLK	SAOUHSC_02584	Uncharacterized protein	no	Enzyme		2.08825		0.565041		0.948314		0.322752			2.31649	1.86001	0.54666	0.583423	0.897783	0.998845	0.452174	0.19333
Q2FVL8_C452	Q2FVL8	AGNSUGK	SAOUHSC_02684	Assimilatory nitrite reductase [NAD(P)H], large subunit, putative	no	Enzyme		1.79658		1.42886		0.563878		0.122078			1.92923	1.66394	1.51838	1.33933	0.493442	0.634314	0.216851	0.0273054
Q2FZV7_C199	Q2FZV7	ITUVEAAPK	SAOUHSC_00878	NADH dehydrogenase-like protein SAOUHSC_00878	no	Enzyme		1.70239		1.55848		0.747974		-0.099866			1.75272	1.65205	1.59074	1.52623	0.786669	0.709278	-0.0542244	-0.145508
Q2FVM0_C204	Q2FVM0	IITQIQQYTDIDYPIAIVFQASUFNEFVVK	SAOUHSC_02682	Uroporphyrin-III C-methyltransferase, putative	no	Enzyme		2.30244		0.893277				0.626299			2.48648	2.11839	1.05929	0.727267			0.830904	0.421695
Q2FYR0_C12	Q2FYR0	FVFDIDGTLUFDGR	SAOUHSC_01375	Uncharacterized protein	no	not assigned		1.75501		1.79901				0.261669			1.82489	1.68513	1.92551	1.67252			0.3122	0.211137
Q2G0M6_C439	Q2G0M6	VFAUGGIPK	araB	Ribulokinase	no	Enzyme		1.36168		0.977758		0.863318		0.597082			1.44811	1.27525	1.0321	0.923415	0.910733	0.815903	0.735782	0.458382
Q2FXR3_C242	Q2FXR3	ELESDLKEGUDMMIVKPALSYLDIVR	hemB	Delta-aminolevulinic acid dehydratase	no	Enzyme		1.69605		0.928352		0.582716		0.565152			1.77053	1.62157	1.00375	0.852958	0.605305	0.560128	0.869556	0.260748
Q2FVV7_C185	Q2FVV7	LVGAUGLDSMR	SAOUHSC_02584	Uncharacterized protein	no	Enzyme	Functional site	2.12408		0.282671		0.821628		0.4972			2.34798	1.90018	0.10675	0.458592	0.244522	1.39873	0.572599	0.421802
Q2G0G2_C106	Q2G0G2	NEQGPYYAGLTAUYLLVNK	SAOUHSC_00607	Uncharacterized protein	no	not assigned		1.35236		1.30689		0.493031		0.557193			1.42841	1.27632	1.30141	1.31237	0.494672	0.491391	0.352081	0.762306
Q2G078_C191	Q2G078	GELVSUFLLEVDDSLNSINFIDSTAK	SAOUHSC_00742	Ribonucleoside-diphosphate reductase	yes	Enzyme		1.88243		1.09509		0.373157		0.330359			1.90585	1.85902	1.22389	0.966286	0.405012	0.341303	0.387142	0.273576
Q2FV75_C78	Q2FV75	GDNPEITIPLKPTGSHFQQUVWNELR	SAOUHSC_02861	Methylated-DNA--protein-cysteine methyltransferase	no	Gene expression and Nucleic acid binding		1.93811		1.11358		0.387414		0.2153			1.97537	1.90084	1.24318	0.983969	0.361993	0.412836	0.253384	0.177216
Q2FXF5_C89	Q2FXF5	NSNLVVTLCSDADVNUPSLPTNVK	arsC	Arsenate reductase	no	Enzyme	Functional site	2.10345		1.04232		0.31551		0.186459			2.29323	1.91367	0.944184	1.14045	0.0985543	0.532467	0.225803	0.147116
Q2FWM4_C93	Q2FWM4	IIDULETAHTR	SAOUHSC_02265	Accessory gene regulator protein A	no	Gene expression and Nucleic acid binding		1.6166		1.0926		0.520893		0.415947			1.63631	1.59689	1.15127	1.03393	0.574925	0.466862	0.499272	0.332622
Q2G0R0_C259	Q2G0R0	NAPUIIFIDEIDAVGR	ftsH	ATP-dependent zinc metalloprotease FtsH	no	Enzyme		1.49517		1.06812		0.616981		0.454091			1.64464	1.3457	1.06516	1.07108	0.653081	0.58088	0.614205	0.293978
Q2FZU5_C286	Q2FZU5	ELFELDUDILVPAAISNQITEDNAHDIK	SAOUHSC_00895	Glutamate dehydrogenase	no	Enzyme		1.47705		0.951002		0.762695		0.43667			1.47944	1.47467	0.908582	0.993421	0.832607	0.692784	0.421695	0.451646
Q2FV86_C161	Q2FV86	GVAVVIUPNDLLTEK	SAOUHSC_02849	Pyruvate oxidase, putative	no	Enzyme		1.38009		1.07279		1.03295		0.130531			1.37557	1.3846	1.24031	0.905274	0.900799	1.16511	0.219958	0.0411028
Q2G0S8_C139	Q2G0S8	IGTDIPFUIYNK	SAOUHSC_00466	Putative 4-diphosphocytidyl-2-C-methyl-D-erythritol kinase	no	Enzyme	Functional site	1.81059		1.31133		0.460501		0.00307144			1.92661	1.69457	1.33874	1.28392	0.539829	0.381173	0.137504	-0.131361
Q2FV77_C366	Q2FV77	ASLELLNVESAQELGHVVAAVGLAQNFAAUR	SAOUHSC_02859	3-hydroxy-3-methylglutaryl coenzyme A reductase	yes	Enzyme		1.48352		0.927612		0.618802		0.538736			1.55297	1.41408	0.954271	0.900954	0.619272	0.618333	0.580242	0.497229
Q2FXA3_C55	Q2FXA3	YSLFDITHQPELUAYVTHLPVDNYHTDAAILYK	hemE	Uroporphyrinogen decarboxylase	no	Enzyme		1.55313		1.0934		0.604614		0.316955			1.63534	1.47093	1.11676	1.07005	0.656359	0.552869	0.377624	0.256286
Q2FZL5_C175	Q2FZL5	EIWYLUR	menB	1,4-dihydroxy-2-naphthoyl-CoA synthase	no	Enzyme		1.08656		1.22628		0.549366		0.695993			1.19292	0.980207	1.40548	1.04707	0.581589	0.517144	0.902763	0.489222
Q2G0M5_C153	Q2G0M5	VAGELLUQYYFK	SAOUHSC_00535	Uncharacterized epimerase/dehydratase SAOUHSC_00535	no	Enzyme		1.67163		1.43335		0.392381		0.0532754			1.74982	1.59343	1.47457	1.39213	0.462208	0.322554	0.0832888	0.023262
Q2G0S2_C256	Q2G0S2	EVYACUTHPVLSGPAK	prs	Ribose-phosphate pyrophosphokinase	yes	Enzyme		1.04331		1.51008		0.88992		0.0866263			1.04411	1.0425	1.55277	1.46738	0.917012	0.862828	-0.0772379	0.25049
Q2FV74_C569	Q2FV74	NTIIIUTSNAGFGNGNDAEEKDIMHEMK	clpL	ATP-dependent Clp protease ATP-binding subunit ClpL	no	not assigned		2.40749						1.11922			2.61413	2.20084					1.12505	1.11339
Q2FWD9_C12	Q2FWD9	MYETYHSGWIEUITGSMFSGK	tdk	Thymidine kinase	no	Enzyme	Functional site	1.3492		1.55128		0.732161		-0.106857			1.45339	1.24501	1.56203	1.54052	0.694212	0.77011	-0.0192873	-0.194427
Q2FZW9_C233	Q2FZW9	EILAUGLDVLANEPIDHTHPLMGR	SAOUHSC_00866	D-isomer specific 2-hydroxyacid dehydrogenase, NAD binding domain protein	no	Enzyme		1.49378		0.953169		0.48642		0.591351			1.45107	1.5365	0.840765	1.06557	0.794603	0.178237	0.459537	0.723165
Q93T05_C646	Q93T05	EAEDPFTUPHGRPIIINFSK	mutL	DNA mismatch repair protein MutL	no	Gene expression and Nucleic acid binding		1.63789		1.18312		0.556276		0.142111			1.7467	1.52907	1.3501	1.01614	0.70558	0.406972	0.159629	0.124593
Q2G1S4_C357	Q2G1S4	ELKUPVIALSQLSR	SAOUHSC_00018	Replicative DNA helicase	yes	Gene expression and Nucleic acid binding		1.79893		1.02206		0.471183		0.224027			1.90196	1.6959	1.01414	1.02998	0.501414	0.440952	0.196607	0.251446
Q2FWY9_C91	Q2FWY9	DNIITNGLETTUASK	gatA	Glutamyl-tRNA(Gln) amidotransferase subunit A	yes	Enzyme		1.82521		1.05507		0.420143		0.213962			1.85619	1.79423	1.11501	0.995122	0.484424	0.355861	0.263395	0.164529
Q2FXY0_C277	Q2FXY0	RPLVUFFSNDLNIHR	SAOUHSC_01700	Uncharacterized protein	yes	not assigned		1.78984		0.765954		0.532125		0.418228			2.00771	1.57197	0.85989	0.672018	0.593115	0.471135	0.352887	0.483568
Q2G1K9_C370	Q2G1K9	QAFQIUEDTLHFGGLGHTAVIHTEDETLQK	SAOUHSC_00113	Aldehyde-alcohol dehydrogenase	no	Enzyme		1.61135		1.2706		0.429501		0.191333			1.657	1.56569	1.29045	1.25075	0.445172	0.41383	0.340973	0.0416922
Q2FY27_C15	Q2FY27	IILAADVGGTTUK	SAOUHSC_01646	Glucokinase, putative	no	Enzyme		1.31851		1.21428		0.684009		0.27735			1.49644	1.14057	1.0482	1.38036	0.757791	0.610228	0.271158	0.283542
Q2G0G1_C34	Q2G0G1	PGEALVQTEYUGVCHTDLHVK	adh	Alcohol dehydrogenase	no	Enzyme	Functional site	1.02172		0.988696		1.34505		0.136013			0.890797	1.15264	0.8746	1.10279	1.38383	1.30626	0.227002	0.0450235
Q2G2G2_C17	Q2G2G2	THLLIVDDEQDIVDIUQTYFEYEGYK	saeR	Response regulator SaeR	no	Gene expression and Nucleic acid binding		1.68225		1.14837				0.656613			1.79851	1.56599	1.03773	1.259			0.704606	0.60862
Q2FYU7_C468	Q2FYU7	HUYKADPEYGK	katA	Catalase	no	Enzyme		1.51533		1.07043		0.5367		0.354746			1.57923	1.45144	1.10729	1.03358	0.618802	0.454597	0.419539	0.289952
Q2FWE2_C304	Q2FWE2	VAFIPSEAQFIQLUQDDNDVK	SAOUHSC_02357	Threonylcarbamoyl-AMP synthase	yes	Enzyme		1.53638		1.37312		0.587038		-0.0285789			1.56438	1.50838	1.33394	1.41229	0.621993	0.552082	-0.0387768	-0.0183811
Q2FY43_C49	Q2FY43	DLGIQTVAIYSEGDKDALHTQIADEAYUVGPTLSK	SAOUHSC_01623	Acetyl-CoA carboxylase, biotin carboxylase	yes	Enzyme		1.66472		1.23404		0.352991		0.21452			1.76897	1.56047	1.2027	1.26538	0.438506	0.267476	0.292193	0.136848
Q2FZ03_C70	Q2FZ03	MVELEUPSIISQVK	SAOUHSC_01268	Uncharacterized protein	no	not assigned		1.29299		1.31388		0.55068		0.308479			1.41489	1.17108	1.34579	1.28197	0.6072	0.49416	0.356933	0.260026
Q2G2M3_C210	Q2G2M3	LVSDKUDFYIK	SAOUHSC_00513	Uncharacterized protein	no	Gene expression and Nucleic acid binding		1.62478		1.41148				0.427472			1.72199	1.52757	1.38504	1.43792			0.467801	0.387142
Q2FZV7_C354	Q2FZV7	GTVUSLGSHDGVGMVFGK	SAOUHSC_00878	NADH dehydrogenase-like protein SAOUHSC_00878	no	Enzyme		1.84405		1.12163		0.480181		0.00582012			1.88096	1.80715	1.14854	1.09471	0.509138	0.451224	0.0532504	-0.0416102
Q2FVT8_C265	Q2FVT8	AGQPVELUGTYVLLASEESSYTTGQVFGVSGGVQID	SAOUHSC_02604	Uncharacterized protein	no	Enzyme		2.85328						0.594992			3.25984	2.44671					0.652142	0.537843
Q2FUQ2_C88	Q2FUQ2	TFTREDIIEINUHGGILTINR	mnmE	tRNA modification GTPase MnmE	yes	not assigned	Functional site	1.95082				1.1323		0.358816			1.9498	1.95185			1.23469	1.02991	0.824564	-0.106933
Q2G0A6_C82	Q2G0A6	LTPYVMSYDDIISFUK	SAOUHSC_00699	Deoxyribodipyrimidine photolyase, putative	no	Gene expression and Nucleic acid binding		1.5086		1.32198				0.608651			1.60957	1.40762	1.59565	1.04831			0.512075	0.705226
Q2FYZ7_C53	Q2FYZ7	QNHIEUFIHIDLIK	SAOUHSC_01274	Glycerol uptake operon antiterminator regulatory protein	no	Gene expression and Nucleic acid binding		1.37519		0.809062		0.796627		0.420288			1.43071	1.31968	1.09727	0.52085	0.819341	0.773912	0.533264	0.307312
Q2FZS8_C397	Q2FZS8	AIDLVDQAUATIR	clpB	Chaperone protein ClpB	no	Enzyme		1.7082		0.915274		0.440538		0.336088			1.82206	1.59433	0.979898	0.85065	0.495759	0.385317	0.363257	0.308918
Q2G1W4_C308	Q2G1W4	NIVAAGLADQUEVQLAYAIGVAEPVSIAIDTFGTGK	metK	S-adenosylmethionine synthase	yes	Enzyme		1.58811		0.922904		0.475753		0.408497			1.68934	1.48687	0.939302	0.906506	0.518334	0.433173	0.480369	0.336626
Q2FZS8_C309	Q2FZS8	GELHUIGATTLNEYR	clpB	Chaperone protein ClpB	no	Enzyme		1.70531		0.853434		0.473984		0.327034			1.79057	1.62005	0.841045	0.865823	0.390778	0.557189	0.366329	0.287739
Q2FXZ6_C11	Q2FXZ6	STVAFHTLGUK	SAOUHSC_01679	Uncharacterized protein	no	Enzyme		1.13938		1.31498		0.649574		0.222295			0.829119	1.44964	1.33411	1.29584	0.60985	0.689299	0.207393	0.237197
Q2FZC6_C143	Q2FZC6	INPHVEVHGVAUPGFVPLVEQMR	murI	Glutamate racemase	yes	Enzyme		1.40138		0.842665		0.866273		0.162043			1.59156	1.21121	0.680504	1.00482	1.37979	0.352759	0.206286	0.1178
Q2G296_C207	Q2G296	EDGFNITVASEIMAILULSR	fhs	Formate--tetrahydrofolate ligase	no	Enzyme		1.69867		0.559873		0.319265		0.687519			1.60445	1.7929	0.562086	0.557659	0.180148	0.458382	0.6469	0.728138
Q2FZ03_C54	Q2FZ03	VGPLETTVQGNMNEULILIQSLNER	SAOUHSC_01268	Uncharacterized protein	no	not assigned		1.26177		1.19915		0.593731		0.197504			1.36715	1.1564	1.26796	1.13034	0.715806	0.471656	0.234992	0.160017
Q2G163_C115	Q2G163	CVGATTVATTMIUAAMAGIQFFVTGGIGGVHK	psuG	Pseudouridine-5'-phosphate glycosidase	no	Enzyme		1.61501		0.864123		0.53825		0.215905			1.62994	1.60008	1.00281	0.725436	0.65104	0.425459	0.208018	0.223793
Q2G097_C201	Q2G097	EVADVHLUL	SAOUHSC_00724	Chorismate binding enzyme, putative	no	Enzyme		1.45925		0.760885		0.502836		0.50043			1.64159	1.27691	0.955685	0.566084	0.732573	0.273098	0.475292	0.525568
Q2FYR0_C248	Q2FYR0	HINNNAQAIUK	SAOUHSC_01375	Uncharacterized protein	no	not assigned		1.32002		1.43625		0.63434		-0.177267			1.51433	1.12571	1.47028	1.40222	1.20614	0.0625362	-0.157621	-0.196914
Q2FY88_C137	Q2FY88	LENLUSLYDIDKEK	SAOUHSC_01576	Exonuclease family	no	Gene expression and Nucleic acid binding		1.49034		0.98439		0.431397		0.2997			1.60507	1.37562	1.11982	0.848958	0.379843	0.482952	0.229606	0.369793
Q2FW19_C43	Q2FW19	IUFRELAYK	rpsZ	30S ribosomal protein S14 type Z	yes	Modulator/Scaffolding/Adaptor	Functional site	1.51332		1.23904		0.344402		0.106434			1.71731	1.30933	1.11537	1.36272	0.314492	0.374312	0.106865	0.106003
Q2G1N2_C259	Q2G1N2	VVVDDWSQUNR	SAOUHSC_00076	Ornithine cyclodeaminase, putative	no	Enzyme		1.90989		0.800993		0.318434		0.162543			1.88082	1.93897	0.801241	0.800745	0.353775	0.283092	0.224781	0.100305
Q2FXM3_C218	Q2FXM3	MLPFQGYVLQHFELMDDGFUQVK	SAOUHSC_01812	Uncharacterized protein	no	Gene expression and Nucleic acid binding		1.3623		1.56339		0.465621		-0.205807			1.37551	1.34908	1.59851	1.52827	0.530217	0.401026	-0.127999	-0.283615
Q2FZ31_C52	Q2FZ31	FAELVUSNSLR	trmFO	Methylenetetrahydrofolate--tRNA-(uracil-5-)-methyltransferase TrmFO	no	Gene expression and Nucleic acid binding		1.84448		0.919733		0.37368		0.0251735			1.92556	1.76339	0.90941	0.930057	0.313117	0.434243	0.0834495	-0.0331025
Q2FV86_C413	Q2FV86	FIISSWLGTMGUGLPGAIASK	SAOUHSC_02849	Pyruvate oxidase, putative	no	Enzyme		1.31205		1.19398		0.453438		0.197013			1.49508	1.12902	1.11929	1.26867	0.451857	0.455018	0.242816	0.151209
Q2FZB0_C273	Q2FZB0	TGNPNVIFEHULPSFHNADTK	argF	Ornithine carbamoyltransferase	no	Enzyme		1.87031		0.58589		0.456725		0.216811			1.9536	1.78701	0.65526	0.516519	0.521352	0.392098	0.339251	0.0943712
Q2G1R8_C31	Q2G1R8	MMEEGKDUK	SAOUHSC_00034	Uncharacterized protein	no	Gene expression and Nucleic acid binding		0.942802		1.02183		0.654825		0.499185			1.06234	0.823266	1.13322	0.910439	0.702923	0.606726	0.511407	0.486963
Q2FYZ5_C254	Q2FYZ5	TIDYHFYGQEVPIAGVAGDQQAALFGQAUFER	glpK	Glycerol kinase	no	Enzyme		0.958208		1.43388		0.796061		-0.07861			1.07773	0.838688	1.59388	1.27387	0.862115	0.730007	-0.0536154	-0.103605
Q2G0C6_C216	Q2G0C6	EWYNDNLEQDYHATITVDQVATUK	SAOUHSC_00679	Uncharacterized protein	no	Gene expression and Nucleic acid binding		2.50667						0.597541			2.7233	2.29004					0.759241	0.435842
Q2G0G5_C123	Q2G0G5	VILVGGDUPK	SAOUHSC_00604	Uncharacterized protein	no	Enzyme		1.76665		1.04368				0.289089			1.78806	1.74524	1.1107	0.976657			0.374288	0.20389
Q2FYZ7_C29	Q2FYZ7	MUVLLDMHIGHIK	SAOUHSC_01274	Glycerol uptake operon antiterminator regulatory protein	no	Gene expression and Nucleic acid binding		1.38286		1.04688		0.654514					1.45038	1.31533	0.793521	1.30024	0.871055	0.437973
Q2G2V4_C24	Q2G2V4	FISPLTPPTUR	SAOUHSC_01914	Putative membrane protein insertion efficiency factor	no	not assigned		1.7535				0.857532		0.443948			1.95806	1.54893			0.78785	0.927214	0.572793	0.315102
Q2FUY1_C124	Q2FUY1	ELMAFLUK	arcR	HTH-type transcriptional regulator ArcR	no	Gene expression and Nucleic acid binding	Functional site			1.86278		1.19138							1.92387	1.8017	1.2976	1.08515
Q2G0P8_C37	Q2G0P8	FDUVPSQLNYVIK	ctsR	Transcriptional regulator CtsR	no	Gene expression and Nucleic acid binding		1.52958		0.800881		0.487481		0.232549			1.21493	1.84422	1.03851	0.563256	0.47467	0.500292	0.248019	0.21708
Q2G0I6_C95	Q2G0I6	SUDIAMK	SAOUHSC_00579	Phosphomevalonate kinase	yes	Enzyme		1.21844				1.28444		0.533744			1.46728	0.969602			1.39243	1.17645	0.621337	0.44615
Q7X2S2_C78	Q7X2S2	SNSDTTPAMPLDTUGAMSQGMIGYWLETEINR	arcC2	Carbamate kinase 2	no	Enzyme		1.81986		0.729351		0.29982		0.17251			1.90312	1.7366	1.08263	0.376068	0.341303	0.258338	0.229588	0.115433
Q2FZD2_C29	Q2FZD2	VESGVQLVDFWATWUGPCK	trxA	Thioredoxin	yes	Enzyme		1.06674		1.06632		0.675938		0.203234			1.11618	1.0173	1.29374	0.838902	0.789196	0.56268	0.108151	0.298317
Q2FV11_C126	Q2FV11	GNPMDYEGWAEPEGMETWDFAHULPYFK	betA	Oxygen-dependent choline dehydrogenase	no	Enzyme		1.25548				1.21811		0.521205			1.30469	1.20627			1.6906	0.745625	0.470198	0.572211
Q2FXX1_C255	Q2FXX1	QQIUNDAVK	SAOUHSC_01709	Acetyl-CoA carboxylase, biotin carboxylase, putative	no	Enzyme		1.87248		1.3429				-0.220756			1.91683	1.82812	1.30923	1.37657			-0.123094	-0.318419
Q2G025_C115	Q2G025	GIVTMUAPMGGK	SAOUHSC_00802	Carboxylesterase, putative	no	Enzyme		1.11747		1.04384		0.571696		0.233545			1.12651	1.10842	1.16684	0.920827	0.580821	0.562572	0.32435	0.14274
Q2FZJ6_C140	Q2FZJ6	LYIDEQTFVPUTPLGIMEILK	folD	Bifunctional protein FolD	no	Enzyme		1.6211		0.828651		0.320105		0.195275			1.70221	1.53998	0.876487	0.780814	0.336283	0.303927	0.260146	0.130404
Q2FXM2_C426	Q2FXM2	VASALVIUQMFDEV	SAOUHSC_01813	Uncharacterized protein	no	not assigned		1.42411				1.1371		0.39647			0.643579	2.20464			1.26255	1.01164	0.713784	0.0791562
Q2G293_C182	Q2G293	LMATGGLEIFATDDPEITSHPANULMAR	SAOUHSC_01847	Uncharacterized protein	no	Enzyme		1.55109		0.895781		0.31444		0.19571			1.58294	1.51924	0.859652	0.93191	0.351967	0.276913	0.236707	0.154713
Q2FWG7_C56	Q2FWG7	SIAENEGVNDTLVIELAULLHDTVDEK	SAOUHSC_02324	Uncharacterized protein	no	not assigned				1.72297		1.22677							1.82713	1.6188	0.959325	1.49421
Q2FYZ9_C87	Q2FYZ9	VAIUEQMEDPK	mutS	DNA mismatch repair protein MutS	no	Gene expression and Nucleic acid binding		1.72062		0.815807		0.640629		-0.229151			1.90858	1.53267	1.08396	0.547653	0.517931	0.763327	-0.246097	-0.212206
Q2FWD2_C29	Q2FWD2	QSLEIQMAAQULIQAIGGEGYVYVK	SAOUHSC_02367	Uncharacterized protein	no	not assigned		1.13894		0.918343		0.563975		0.323696			1.23769	1.04019	0.953377	0.883308	0.577344	0.550605	0.426318	0.221073
Q2FZ37_C102	Q2FZ37	LYIEEGUAIQK	sucC	Succinate--CoA ligase [ADP-forming] subunit beta	yes	Enzyme	Functional site	1.4182		0.639395		0.526116		0.356159			1.51551	1.32089	0.691713	0.587077	0.538439	0.513794	0.386701	0.325617
Q2FZW9_C24	Q2FZW9	DADAUFITLSEQIDAEILAQSPNLK	SAOUHSC_00866	D-isomer specific 2-hydroxyacid dehydrogenase, NAD binding domain protein	no	Enzyme		1.07734		0.826321		0.586772		0.433048			1.20301	0.951662	0.805503	0.847139	0.670851	0.502692	0.478402	0.387693
Q2FVC3_C403	Q2FVC3	LQAALESDILUPFHYFGVTDYVHQGIKEDDVTK	SAOUHSC_02790	Uncharacterized protein	no	Gene expression and Nucleic acid binding		1.32918		0.779207		0.583384		0.23051			1.54399	1.11437	0.886667	0.671746	0.487795	0.678973	0.207393	0.253626
Q2FV16_C373	Q2FV16	EGUMNHLR	mqo	Probable malate:quinone oxidoreductase	no	Enzyme		1.43889		1.10483		0.508432		-0.135863			1.55493	1.32285	1.15704	1.05262	0.550211	0.466653	-0.064314	-0.207411
Q2G1D7_C110	Q2G1D7	ENGVHTCLDTSAGUANDTK	pflA	Pyruvate formate-lyase-activating enzyme	no	Enzyme		1.52348		0.920573				0.465517			1.6185	1.42846	1.03668	0.804467			0.4336	0.497434
Q2G0I1_C78	Q2G0I1	QAUDNFVSR	SAOUHSC_00584	Uncharacterized protein	no	not assigned		1.38294		0.827326				0.691824			1.40332	1.36255	0.89243	0.762221			0.699907	0.683741
Q2G000_C29	Q2G000	FEAGWUPDCR	SAOUHSC_00834	Thioredoxin, putative	no	Enzyme		1.54726		0.811681		0.319049		0.216584			1.59037	1.50414	0.749234	0.874128	0.287827	0.350271	0.282616	0.150553
Q2FZ58_C153	Q2FZ58	ANNTEDUIELMEYIIVK	SAOUHSC_01193	Uncharacterized protein SAOUHSC_01193	no	Enzyme		1.2558		0.64046		0.400218		0.595645			1.33885	1.17274	0.691445	0.589476	0.430606	0.369829	0.655535	0.535754
Q2FVB2_C248	Q2FVB2	VULANLLR	fbp	Fructose-1,6-bisphosphatase class 3	no	Enzyme		1.35789				1.16771		0.360919			1.4104	1.30539			1.35146	0.983969	0.356257	0.365581
Q2FW62_C189	Q2FW62	QETTEWUEK	SAOUHSC_02445	Zinc-type alcohol dehydrogenase-like protein	no	Enzyme		1.38863		0.746697		0.577767		0.172999			1.40632	1.37095	0.735176	0.758218	0.379177	0.776357	0.172359	0.173639
Q2FVS1_C142	Q2FVS1	AIDGATLNDUR	SAOUHSC_02621	Putative 3-methyladenine DNA glycosylase	no	Gene expression and Nucleic acid binding		1.60681		0.999027		0.0359193		0.243089			2.0545	1.15911	0.955759	1.04229	0.133169	-0.0613303	0.15562	0.330558
Q2FY89_C128	Q2FY89	TPVNVNGUVSAGVGER	SAOUHSC_01575	Helix-turn-helix domain protein	no	Gene expression and Nucleic acid binding		1.75589		0.70595				0.42284			1.76672	1.74507	0.790939	0.620962			0.533364	0.312317
Q2FXU2_C27	Q2FXU2	GYULLVGIGQNSTEQDADVIAKK	dtd	D-aminoacyl-tRNA deacylase	yes	Gene expression and Nucleic acid binding		1.17781		0.927815		0.53525		0.241048			1.35675	0.99886	1.05823	0.7974	0.728399	0.3421	0.319559	0.162538
Q2G1W2_C273	Q2G1W2	NGVFNIEGGUYAK	pckA	Phosphoenolpyruvate carboxykinase (ATP)	no	Enzyme		1.52869		0.633933		0.485676		0.22383			1.61023	1.44716	0.688494	0.579373	0.245131	0.726221	0.409364	0.0382957
Q2G2H4_C177	Q2G2H4	PVLTGVNWLIQENELIUTATDSHR	SAOUHSC_00002	Beta sliding clamp	yes	Gene expression and Nucleic acid binding		1.35037		1.17987				0.338965			1.56915	1.13159	1.27745	1.08229			0.271067	0.406863
Q2FV86_C123	Q2FV86	LUEDVAVYNHQIEK	SAOUHSC_02849	Pyruvate oxidase, putative	no	Enzyme		1.24813		0.909622		0.54871		0.155116			1.36654	1.12971	0.965249	0.853996	0.595599	0.501821	0.15362	0.156612
Q2FY19_C106	Q2FY19	VIDYUPIDQIK	fur	Ferric uptake regulation protein	no	Gene expression and Nucleic acid binding	Functional site	1.27726		0.983204		0.461993		0.132311			1.36961	1.18492	1.01564	0.950767	0.556503	0.367483	0.205267	0.0593553
Q2FZT4_C200	Q2FZT4	SLTGGUPMGPYIVTK	SAOUHSC_00906	Uncharacterized protein SAOUHSC_00906	no	Enzyme		1.31366		0.821559		0.428892		0.285365			1.39598	1.23134	0.896689	0.74643	0.51638	0.341403	0.383984	0.186746
Q2FZI6_C260	Q2FZI6	HMNPUGVGIGDTIEQAFQHAYEADSQSIFGGIVALNR	purH	Bifunctional purine biosynthesis protein PurH	no	Enzyme		0.965713		1.03125		0.669239		0.175809			0.984845	0.946581	1.08658	0.975924	0.656084	0.682394	0.354001	-0.00238241
Q2FWK4_C199	Q2FWK4	AGVIETTFKEETETDLFGEQAVLUGGVSK	ilvC	Ketol-acid reductoisomerase (NADP(+))	no	Enzyme	Functional site	1.75733		0.987271				0.0905425			1.85431	1.66034	1.2353	0.739243			0.166587	0.0144981
Q2FWN8_C257	Q2FWN8	EISEEDANYASGLTAVUSIINGGK	SAOUHSC_02244	Uncharacterized protein	no	Enzyme		2.13629				0.698808					1.77425	2.49833			0.730314	0.667302
Q2FZ66_C131	Q2FZ66	IGUTFCASTLGGLK	rlmN	Probable dual-specificity RNA methyltransferase RlmN	no	Gene expression and Nucleic acid binding	Functional site			1.67043		1.11106		0.0304293				0.626879	1.70195	1.63891	1.1105	1.11163	0.121492	-0.0606337
Q2FUX7_C358	Q2FUX7	EQWNDGSNTLUIR	arcA	Arginine deiminase	no	Enzyme		1.95891		0.713324		0.137521		-0.00934965			2.07201	1.84582	0.590185	0.836464	0.0699014	0.20514	0.00302045	-0.0217198
Q2G0J0_C310	Q2G0J0	GUSIEDVYNLSIITAAQALQ	SAOUHSC_00574	Phosphate acetyltransferase	yes	Enzyme		1.32505		0.498161		0.555827		0.419124			1.318	1.33211	0.544782	0.451541	0.566377	0.545277	0.568616	0.269632
Q2FUQ4_C158	Q2FUQ4	LSVLSELULPLVK	rsmG	Ribosomal RNA small subunit methyltransferase G	no	Gene expression and Nucleic acid binding		1.43693		0.603646				0.74833			1.45723	1.41662	0.623773	0.583519			0.880019	0.61664
Q2FXU0_C64	Q2FXU0	GFIIGUPVAYSMGIGFAPVR	apt	Adenine phosphoribosyltransferase	no	Enzyme		1.28892		0.991638		0.365072		0.123311			1.35137	1.22647	1.02502	0.95826	0.363391	0.366753	0.18504	0.061582
Q2G163_C158	Q2G163	TNVTVIUAGAK	psuG	Pseudouridine-5'-phosphate glycosidase	no	Enzyme	Functional site	1.02745		0.661909		0.540923		0.535705			1.08522	0.969675	0.776862	0.546956	0.60065	0.481196	0.729879	0.34153
Q2FXB7_C98	Q2FXB7	IVULNESVDFSEINSVLSLVNLNVDKK	SAOUHSC_01948	ABC transporter domain protein	no	not assigned				1.70509		0.935465		0.124266					1.66207	1.74812	0.955982	0.914947	0.25181	-0.00327864
Q2G0L9_C137	Q2G0L9	EAUSTLLTTFFK	tadA	tRNA-specific adenosine deaminase	no	Gene expression and Nucleic acid binding		1.18463		0.677896		0.282031		0.60579			1.36121	1.00806	0.992116	0.363676	0.0833836	0.480679	0.595599	0.615981
Q2FY04_C54	Q2FY04	TFYGTNVENASYPLSIUAER	SAOUHSC_01670	Cytidine deaminase	no	Enzyme		1.15772		0.805027		0.514739		0.269367			1.26267	1.05276	0.763582	0.846473	0.59684	0.432639	0.362666	0.176067
Q2G0T5_C190	Q2G0T5	FVADAQQIEUEDEALAFIAK	dnaX	DNA polymerase III subunit gamma/tau	yes	Gene expression and Nucleic acid binding		1.49133		0.2365		0.544266		0.439433			1.62561	1.35705	0.789187	-0.316187	0.365804	0.722728	0.593001	0.285864
Q2G030_C40	Q2G030	EVESVIUAPAIQLDALTTAVK	tpiA	Triosephosphate isomerase	yes	Enzyme		1.37568		0.565934		0.367408		0.362866			1.56847	1.18288	0.495695	0.636172	0.417164	0.317651	0.411209	0.314523
Q2G157_C10	Q2G157	MLPHGLIVSUQALPDEPLHSSFIMSK	nanE	Putative N-acetylmannosamine-6-phosphate 2-epimerase	no	Enzyme		1.13086		1.04556		0.363304		0.118432			1.37217	0.889551	1.00971	1.08141	0.422448	0.304161	0.0877344	0.149129
Q2FXI9_C974	Q2FXI9	SVUINSILMSLLYK	SAOUHSC_01857	Uncharacterized protein	no	Gene expression and Nucleic acid binding	Functional site	1.36157		0.529172		0.515332		0.250951			1.49226	1.23088	0.4755	0.582845	0.449746	0.580917	0.401194	0.100709
Q2FZ72_C759	Q2FZ72	EIEVDAIUDGETVIIPGIMEHIER	carB	Carbamoyl-phosphate synthase large chain	no	Enzyme	Functional site	1.35611		0.915165		0.214741		0.164583			1.63524	1.07697	0.903115	0.927214	0.523562	-0.0940792	0.140386	0.188781
Q2G1W4_C44	Q2G1W4	VAUETTVTTGMALIAGEISTTTYVDIPK	metK	S-adenosylmethionine synthase	yes	Enzyme	Functional site	1.70769		0.458313		0.202592		0.279208			1.72831	1.68706	0.584578	0.332049	0.244522	0.160662	0.346531	0.211884
Q2FZ55_C55	Q2FZ55	HUSEKIEMEDEPVR	plsX	Phosphate acyltransferase	yes	Enzyme		1.51279		0.71849		0.284308		0.109483			1.65682	1.36877	0.858379	0.578601	0.30871	0.259905	0.134221	0.0847446
Q2FUV5_C95	Q2FUV5	TGLYSUVDDHLIEAR	SAOUHSC_02996	Peptide methionine sulfoxide reductase, putative	no	Enzyme		1.54449		0.730849		0.211878		0.132457			1.65714	1.43184	0.805705	0.655993	0.153287	0.270469	0.181802	0.0831112
Q2FY32_C105	Q2FY32	NIIWLDUNIDIIYSR	aroK	Shikimate kinase	no	Enzyme				2.61246									2.34238	2.88255
Q2FXY9_C13	Q2FXY9	TVQSAYIHIPFUVR	SAOUHSC_01686	Oxygen-independent coproporphyrinogen-III oxidase-like protein	no	Enzyme		1.75144				0.503208		0.356445			1.84213	1.66075			0.519341	0.487075	0.501006	0.211884
Q2FVL8_C677	Q2FVL8	SUVESGVK	SAOUHSC_02684	Assimilatory nitrite reductase [NAD(P)H], large subunit, putative	no	Enzyme		1.49268		1.00505		-0.104149		0.216055			1.5148	1.47056	1.29131	0.718789	-0.146803	-0.0614959	0.331132	0.100978
Q2FVY1_C156	Q2FVY1	IKNDUDTQLT	SAOUHSC_02541	Molybdopterin-guanine dinucleotide biosynthesis protein MobB	no	not assigned		1.43171		0.677409		0.29957		0.199937			1.4677	1.39572	0.71642	0.638398	0.308361	0.290778	0.29125	0.108625
Q2G032_C151	Q2G032	TIVFNTNHQELDGSETVVSGASUTTNSLAPVAK	SAOUHSC_00795	Glyceraldehyde-3-phosphate dehydrogenase	yes	Enzyme	Functional site	1.39912		0.956257		0.204633		0.0407124			1.48749	1.31075	0.883308	1.02921	0.199751	0.209516	0.0635029	0.0179219
Q2FZ43_C110	Q2FZ43	ADHIVFIUGHYEGYDER	trmD	tRNA (guanine-N(1)-)-methyltransferase	yes	Gene expression and Nucleic acid binding	Functional site	1.37741		0.592989		0.402934		0.21843			1.7853	0.969528	0.627513	0.558464	0.398679	0.40719	0.260026	0.176833
Q2G2P2_C345	Q2G2P2	QGYIGAEELQVFLANKPEIYIUGGTK	SAOUHSC_00204	Globin domain protein	no	Enzyme		1.3226		0.455879		0.430034		0.376605			1.34976	1.29544	0.484831	0.426927	0.435125	0.424943	0.450753	0.302457
Q2FW81_C278	Q2FW81	LVNVDUKDTVLEYSELDPEVANQFNNANIGIHAFK	SAOUHSC_02423	Probable uridylyltransferase SAOUHSC_02423	no	Enzyme		1.27406		0.625167		0.335322		0.350454			1.41213	1.13599	0.856149	0.394185	0.258459	0.412185	0.314871	0.386038
O06446_C775	O06446	DYQNEGHELFDIMMQNIEEDTUK	secA1	Protein translocase subunit SecA 1	yes	Receptor/Transporter/Channel		1.22286		0.770178		0.371966		0.211135			1.29425	1.15147	0.798092	0.742265	0.44291	0.301022	0.231453	0.190817
Q2FZY3_C302	Q2FZY3	YPNUVLLGEGAK	SAOUHSC_00851	UPF0051 protein SAOUHSC_00851	yes	not assigned		1.51153		0.706797		0.281733		0.0756395			1.5713	1.45176	0.76579	0.647805	0.380004	0.183463	0.159159	-0.00787969
Q2FUY1_C38	Q2FUY1	ALADYINIPYSILQPYQSEUFVR	arcR	HTH-type transcriptional regulator ArcR	no	Gene expression and Nucleic acid binding	Functional site	1.48328		0.815371		0.33953		-0.0636242			1.72509	1.24147	0.896001	0.734742	0.302992	0.376068	0.00547185	-0.13272
Q2G0S9_C14	Q2G0S9	NSIDUHVGNR	SAOUHSC_00465	Uncharacterized protein	no	not assigned		1.37606		0.711762		0.329492		0.154298			1.48356	1.26857	0.697039	0.726484	0.433704	0.225281	0.285687	0.0229096
Q2FVL8_C673	Q2FVL8	MGVSGUPR	SAOUHSC_02684	Assimilatory nitrite reductase [NAD(P)H], large subunit, putative	no	Enzyme		1.51831		0.936714		0.146718		-0.0315557			1.59053	1.4461	0.922959	0.950468	0.180403	0.113034	0.0122111	-0.0753224
Q2FYP0_C126	Q2FYP0	GIIANPNUSTIQSVVPLK	asd	Aspartate-semialdehyde dehydrogenase	no	Enzyme	Functional site	1.59408		0.863553		0.166034		-0.0569458			1.73583	1.45233	0.898557	0.82855	0.240131	0.0919367	-0.0363483	-0.0775433
Q2G1C0_C196	Q2G1C0	SILSDAUK	tarI	Ribitol-5-phosphate cytidylyltransferase 1	yes	Enzyme		1.32825		0.689655		0.382272		0.164701			1.46085	1.19566	0.761541	0.617769	0.455018	0.309525	0.180403	0.148999
Q2G0M1_C181	Q2G0M1	YDDWINSFNAUPVVR	SAOUHSC_00539	Uncharacterized protein	no	Enzyme		1.23604		0.479453		0.449913		0.394876			1.43829	1.03378	0.527233	0.431673	0.485433	0.414394	0.387599	0.402152
Q2FVQ5_C78	Q2FVQ5	DGTVDUSK	mqo	Probable malate:quinone oxidoreductase	no	Enzyme		1.71536		0.874101				-0.0351503			1.81935	1.61136	0.929069	0.819132			-0.0266576	-0.0436429
Q2G1W4_C275	Q2G1W4	HGGGUFSGK	metK	S-adenosylmethionine synthase	yes	Enzyme	Functional site	1.57773		0.672987		0.18054		0.107326			1.65997	1.49549	0.706464	0.63951	0.192952	0.168129	0.158208	0.0564448
Q2FWH6_C207	Q2FWH6	LSQUHEDAK	SAOUHSC_02315	DNA-binding response regulator, putative	no	Gene expression and Nucleic acid binding	Functional site	1.96457						0.568929			1.95561	1.97354					0.62882	0.509037
Q53727_C243	Q53727	NLUVVGDSDQSIYGWR	pcrA	ATP-dependent DNA helicase PcrA	yes	Gene expression and Nucleic acid binding		2.00487						0.527242			2.16861	1.84113					0.462286	0.592199
Q2G2R0_C7	Q2G2R0	IALGUDHIVTDTK	lacB	Galactose-6-phosphate isomerase subunit LacB	no	Enzyme		1.1352		1.00431		0.354132		0.0328486			1.2441	1.0263	1.04278	0.96584	0.395831	0.312433	-0.076495	0.142192
Q2FXU7_C235	Q2FXU7	GQMPPSSNAFVPSVVGLIUASYVVNDVLK	SAOUHSC_01735	Uncharacterized protein	no	Enzyme		1.07866		0.731099		0.506428		0.207745			1.17068	0.98664	0.799977	0.662222	0.436676	0.57618	0.366874	0.0486155
Q2FZ19_C233	Q2FZ19	LIVSUYASNFIR	rnj2	Ribonuclease J 2	yes	Gene expression and Nucleic acid binding		1.19807		0.620655		0.25617		0.43961			1.2532	1.14294	0.661841	0.57947	0.313594	0.198746	0.518383	0.360837
Q2FZ48_C274	Q2FZ48	GVDILIUDTAGR	ftsY	Signal recognition particle receptor FtsY	yes	not assigned	Functional site	1.63206		0.583848				0.293853			1.68925	1.57487	0.781989	0.385707			0.37389	0.213817
Q2FY53_C111	Q2FY53	SNNDWQUPLTIR	SAOUHSC_01612	2-oxoisovalerate dehydrogenase, E1 component, beta subunit, putative	no	Enzyme		1.4735		0.699936		0.156785		0.176107			1.48464	1.46236	0.754631	0.645241	0.156397	0.157173	0.2074	0.144815
Q2G0Q0_C75	Q2G0Q0	EALQNSTLPMFGTUAGLIVLAQDIVGEEGYLNK	pdxT	Pyridoxal 5'-phosphate synthase subunit PdxT	no	Enzyme	Functional site	1.17596		0.953586		0.296286		0.0781691			1.22879	1.12314	0.972693	0.934479	0.380064	0.212507	0.0398403	0.116498
Q2G097_C26	Q2G097	IKUSSER	SAOUHSC_00724	Chorismate binding enzyme, putative	no	Enzyme		1.1558		0.758669		0.423185		0.165442			1.37395	0.937646	0.735349	0.781989	0.404249	0.442121	0.244644	0.0862403
Q2FZ74_C178	Q2FZ74	AIVAHUEDNSLIYGGAMHEGKR	pyrC	Dihydroorotase	no	Enzyme	Functional site	1.28443		0.866086		0.451646		-0.0997038			1.39797	1.17089	0.905736	0.826437	0.464041	0.439251	-0.132451	-0.0669562
Q2FWK9_C68	Q2FWK9	LHHMDUYR	SAOUHSC_02280	Uncharacterized protein	yes	not assigned		1.50196		0.579614		0.102359		0.303642			1.39501	1.6089	0.473423	0.685806	0.254473	-0.0497556	0.342327	0.264957
Q2FXV8_C236	Q2FXV8	AALLYTLEEEUIK	recD2	ATP-dependent RecD-like DNA helicase	no	Gene expression and Nucleic acid binding		1.79254						0.690735			1.97207	1.61301					0.767655	0.613815
Q2FY72_C48	Q2FY72	ELVYHNGAVAVUAVTPK	SAOUHSC_01593	NUDIX domain protein	no	not assigned		1.3948		0.791794		0.171502		0.11525			1.45675	1.33285	0.832039	0.751549	0.210888	0.132116	0.173639	0.0568609
Q2G1C8_C202	Q2G1C8	ETGKPHUFVVRPEQDGVDIEVIDNK	SAOUHSC_00197	Uncharacterized protein	no	Enzyme		1.13463		1.29777		0.49123		-0.477289			1.23603	1.03323	1.37762	1.21791	0.45249	0.529971	-0.330157	-0.624421
Q2G159_C129	Q2G159	IFUMTLGTGIGGAYK	SAOUHSC_00296	ROK family protein	no	not assigned		1.08857		1.32202				0.0225677			1.20151	0.97563	1.2893	1.35473			-0.0532841	0.0984196
Q2FZ22_C47	Q2FZ22	MDUEIAVIVGGGNIWR	pyrH	Uridylate kinase	yes	Enzyme		1.14743		0.588631		0.334164		0.362602			1.33878	0.956081	0.611501	0.565761	0.38405	0.284277	0.507565	0.217639
Q2G2L3_C103	Q2G2L3	IPGIELMDEULK	tarA	N-acetylglucosaminyldiphosphoundecaprenol N-acetyl-beta-D-mannosaminyltransferase	yes	Enzyme		1.68171				0.155013		0.573023			1.64704	1.71638			0.346758	-0.036733	0.594357	0.551688
Q2FYJ0_C1074	Q2FYJ0	DIHESIUQSTLGLLQPQMGLLR	SAOUHSC_01455	Uncharacterized protein	no	not assigned		1.91246						0.494728			2.0377	1.78722					0.540027	0.449429
Q2FXG9_C181	Q2FXG9	NHAPFIUAIEK	SAOUHSC_01878	Uncharacterized protein	no	not assigned		1.23471		0.548733		0.514026		0.105428			1.23744	1.23199	0.0619835	1.03548	0.278817	0.749234	0.128425	0.0824301
Q2FZ48_C311	Q2FZ48	AVPDAPHEALLULDATTGQNALSQAR	ftsY	Signal recognition particle receptor FtsY	yes	not assigned		1.36217		0.417448		0.459494		0.158452			1.4305	1.29384	0.393306	0.44159	0.527771	0.391218	0.234747	0.0821576
Q2FZW0_C217	Q2FZW0	IYNUDEPKDIDLVVWTAGIQPVEVVR	SAOUHSC_00875	Uncharacterized protein	no	Enzyme		1.37422		0.6602		0.198311		0.155033			1.4694	1.27905	0.671475	0.648926	0.266876	0.129745	0.257662	0.052404
Q2FZF6_C123	Q2FZF6	ENGIIVUEFSNHEEIDYQPFNMIK	SAOUHSC_01074	Uncharacterized protein	no	Gene expression and Nucleic acid binding		1.2159		0.704327		0.300834		0.163111			1.42046	1.01135	0.510253	0.898402	0.557484	0.0441843	0.161049	0.165172
Q2FVV9_C592	Q2FVV9	GHNNVQGUSDMGSMPDK	SAOUHSC_02582	Putative formate dehydrogenase SAOUHSC_02582	no	Enzyme		1.14718		0.687193		0.372279		0.176859			1.37955	0.914804	0.689389	0.684998	0.445197	0.299362	0.335206	0.0185117
Q2FY10_C245	Q2FY10	IQEELNYFEEIVSEIGUPVIDVSQK	SAOUHSC_01664	Putative pyruvate, phosphate dikinase regulatory protein	no	Enzyme		1.70818		0.814369		-0.00453459		-0.137775			1.69831	1.71804	0.880019	0.748719	0.0506062	-0.0596754	-0.0612099	-0.214341
Q2FZJ1_C13	Q2FZJ1	FAVLVFPGSNUDR	purQ	Phosphoribosylformylglycinamidine synthase subunit PurQ	no	Enzyme		1.55874		0.834774		0.251988		-0.269604			1.56769	1.54979	0.753209	0.916339	0.253533	0.250443	-0.222341	-0.316868
Q2G222_C513	Q2G222	EVSDSMPYPHGQUTWYVYNR	SAOUHSC_02979	N-acetylmuramoyl-L-alanine amidase domain-containing protein SAOUHSC_02979	no	Enzyme		1.48097		0.448876		0.131727		0.308846			1.60654	1.35541	0.38416	0.513592	0.220949	0.0425043	0.420078	0.197614
Q2FVX2_C11	Q2FVX2	ASISMSDIYUNGTIFENDDEQLIYLTPSFPQR	SAOUHSC_02551	Uncharacterized protein	no	not assigned		1.71737						0.639117			1.97962	1.45512					0.750263	0.527971
Q2G1J4_C225	Q2G1J4	IUNNLNINVLDVIEMANK	SAOUHSC_00128	Cap5O protein/UDP-N-acetyl-D-mannosaminuronic acid dehydrogenase	no	Enzyme		1.7275						0.627			1.49124	1.96377					0.626486	0.627513
Q2G0I8_C234	Q2G0I8	ASDVIEHHNFEALADIFNEUHADLK	SAOUHSC_00577	Mevalonate kinase, putative	yes	Enzyme		1.24557		1.23199		0.217826		-0.344525			1.42315	1.06798	1.18492	1.27906	0.392867	0.0427844	-0.461104	-0.227945
Q2FUY1_C166	Q2FUY1	LIUHLCQTVGYDQDEFYEIK	arcR	HTH-type transcriptional regulator ArcR	no	Gene expression and Nucleic acid binding						1.4632		0.882102							1.45985	1.46655	0.781402	0.982802
Q2FXK3_C85	Q2FXK3	FTDISIEQQSIGTAULNNGK	SAOUHSC_01831	Uncharacterized protein	no	not assigned		1.97497						0.362435			2.13967	1.81028					0.343919	0.380951
Q2G0G6_C194	Q2G0G6	ENEAVLQYUVDHQITFIPYFPLASGILAGK	SAOUHSC_00603	Uncharacterized protein	no	Enzyme		1.23618		0.418393		0.308011		0.368242			1.3344	1.13796	0.462052	0.374733	0.321004	0.295018	0.456596	0.279887
Q2FWZ3_C411	Q2FWZ3	RIVYISUNPATQQR	SAOUHSC_02113	RNA methyltransferase, TrmA family, putative	no	Gene expression and Nucleic acid binding	Functional site	0.869264		0.680452		0.482423		0.29735			0.80488	0.933648	0.781821	0.579084	0.512884	0.451963	0.379954	0.214747
Q2G1G7_C269	Q2G1G7	QIUPHSIQPQFTTQR	SAOUHSC_00156	Uncharacterized protein	no	Enzyme		1.33943		0.757368		0.139598		0.0862941			1.4864	1.19246	0.732747	0.781989	0.0765591	0.202637	0.154636	0.0179517
Q2FWB9_C37	Q2FWB9	SVUVNPTHVK	deoC	Deoxyribose-phosphate aldolase	no	Enzyme		0.873349		0.946297		0.447051		0.0534786			0.935309	0.811389	0.980639	0.911956	0.471665	0.422437	0.0720372	0.03492
Q2FV14_C446	Q2FV14	EUAVVAK	SAOUHSC_02929	Acetyl-CoA synthetase, putative	no	Enzyme		1.10552		0.905913		0.206861		0.0980259			1.19263	1.01841	0.948601	0.863225	0.252416	0.161307	0.133665	0.0623864
Q2G2V5_C124	Q2G2V5	NDYLETAGPVLFNUINDIELAQR	SAOUHSC_01913	Uncharacterized protein	no	not assigned		2.30787						0.00324218			2.60402	2.01171					-0.0144267	0.0209111
Q2FZ19_C372	Q2FZ19	IHASSHGUMEELK	rnj2	Ribonuclease J 2	yes	Gene expression and Nucleic acid binding		1.32756		0.640593		0.118644		0.223101			1.43256	1.22255	0.674784	0.606402	0.214864	0.0224243	0.245382	0.200821
Q2FZW0_C271	Q2FZW0	NVYVVGDUADLPHAPSAQLAEVQGDQIADVLK	SAOUHSC_00875	Uncharacterized protein	no	Enzyme		1.41468		0.626744		0.145888		0.119103			1.46783	1.36153	0.711546	0.541942	0.194923	0.0968542	0.178936	0.0592706
Q2G2G7_C134	Q2G2G7	VULDHMKPDKPFIK	SAOUHSC_01054	UPF0637 protein SAOUHSC_01054	no	not assigned		1.28121		0.438658		0.114907		0.466488			1.36166	1.20076	0.393746	0.483571	0.217603	0.0122111	0.997184	-0.0642084
Q2G167_C193	Q2G167	AUIIVTHDER	SAOUHSC_00287	ABC transporter, ATP-binding protein, putative	no	not assigned		1.99526						0.301514			1.85571	2.13481					0.46999	0.133037
Q2G1Z9_C154	Q2G1Z9	FRGDGLUVSTPSGSTAYNK	nadK	NAD kinase	yes	Enzyme	Functional site	0.958239		1.26124				0.0658302			0.969823	0.946656	1.18187	1.34062			0.0586628	0.0729976
Q2FX19_C194	Q2FX19	YTQLLETVNDKDFETHIVEAYDUFMSEK	SAOUHSC_02087	Conserved hypothetical phage protein	no	not assigned		1.57577						0.699163			1.64312	1.50843					0.590147	0.808179
Q2FVW3_C186	Q2FVW3	GLIDDIDLKHPDUAK	SAOUHSC_02579	Uncharacterized protein	no	not assigned		1.17051		0.602339		0.305548		0.194627			1.21272	1.1283	0.680414	0.524264	0.374511	0.236584	0.249656	0.139598
Q2FZC8_C44	Q2FZC8	SHSVUAQGGINGAVNTK	SAOUHSC_01104	Succinate dehydrogenase, flavoprotein chain TC0881, putative	no	Enzyme		1.45654		0.631113				0.181902			1.47954	1.43355	0.754203	0.508023			0.172999	0.190804
O34090_C204	O34090	DTLLPAIGQGALGIEUR	hemC	Porphobilinogen deaminase	no	Enzyme		1.27231		0.616409		0.297363		0.0817984			1.33729	1.20733	0.710046	0.522772	0.301119	0.293606	0.178776	-0.0151795
Q2FV28_C200	Q2FV28	SIEMUNDYNIFR	queH	Epoxyqueuosine reductase QueH	no	Enzyme		1.24847		0.653717		0.283502		0.0813588			1.32953	1.16742	0.663208	0.644225	0.365245	0.201759	0.1149	0.0478175
Q2FWW9_C187	Q2FWW9	LEDIELIUDR	SAOUHSC_02152	ABC transporter, ATP-binding protein, putative	yes	not assigned		1.78195						0.481362			1.75145	1.81246					0.498864	0.46386
Q2FXM8_C232	Q2FXM8	HSIVLVAEGCMTAQDUQK	pfkA	ATP-dependent 6-phosphofructokinase	yes	Enzyme		1.36121		0.811204		0.0634803		0.0196739			1.27142	1.45101	0.83943	0.782978	0.0630168	0.0639439	0.0794293	-0.0400815
Q2G2R0_C117	Q2G2R0	IIGELLMUDIIDAFINAEYKPTEENK	lacB	Galactose-6-phosphate isomerase subunit LacB	no	Enzyme				1.40065		0.84695							1.39928	1.40201	0.949049	0.74485
Q2FXV9_C667	Q2FXV9	VVNMAPFSIELUGGIHVR	alaS	Alanine--tRNA ligase	yes	Gene expression and Nucleic acid binding	Functional site	1.81542						0.416826			1.94437	1.68648					0.43082	0.402831
Q2G0U6_C60	Q2G0U6	QUVAFFTLHR	SAOUHSC_00430	Uncharacterized protein	no	Enzyme		1.45402						0.777982			1.57318	1.33485					0.827738	0.728225
Q2FZ23_C240	Q2FZ23	YLQEIUAVDQDFVK	tsf	Elongation factor Ts	yes	Gene expression and Nucleic acid binding		1.02138		0.477245		0.395616		0.33476			1.06647	0.97629	0.508023	0.446468	0.417056	0.374177	0.408551	0.260969
Q2FVW3_C171	Q2FVW3	VLYQGYTUFR	SAOUHSC_02579	Uncharacterized protein	no	not assigned		1.31077		0.324457		0.454943		0.138757			1.51278	1.10876	0.135929	0.512985	0.488515	0.421371	0.151599	0.125916
Q2FZH7_C172	Q2FZH7	DHIQKUENVIK	SAOUHSC_01027	Uncharacterized protein	no	not assigned		1.54842		0.417988		0.0288138		0.232567			1.42486	1.67197	0.310107	0.525868	0.100709	-0.043081	0.2652	0.199934
Q2FXT6_C269	Q2FXT6	GMDMFDUVLPTR	tgt	Queuine tRNA-ribosyltransferase	no	Gene expression and Nucleic acid binding	Functional site	1.33197		0.58056		0.197315		0.117657			1.46326	1.20069	0.63385	0.527271	0.260146	0.134484	0.128161	0.107152
Q2FWH3_C286	Q2FWH3	ATDUSGLVR	ddl	D-alanine--D-alanine ligase	yes	Enzyme		1.39587		0.689639		0.00956896		0.131944			1.31297	1.47876	0.732747	0.646531	-0.024938	0.0440759	0.189793	0.0740944
Q2FXJ0_C152	Q2FXJ0	TSFLIGDGTGMGLPESDYFAFEAUEYR	murC	UDP-N-acetylmuramate--L-alanine ligase	yes	Enzyme		1.40721		0.499539		0.179109		0.131638			1.48128	1.33313	0.499372	0.499705	0.14751	0.210708	0.179146	0.0841308
Q2G0M7_C214	Q2G0M7	SPLEGYSVUVFPDSLDEGANIEIGYLPGR	hchA	Protein/nucleic acid deglycase HchA	no	Enzyme		1.31081				0.531504		0.374674			1.40004	1.22158			0.764791	0.298217	0.336745	0.412602
Q2FV27_C67	Q2FV27	VLUSDSFGR	SAOUHSC_02912	Uncharacterized protein	no	not assigned		0.91304		0.683002		0.440125		0.180517			1.00985	0.816231	0.69073	0.675274	0.333195	0.547055	0.223793	0.137241
Q2FZF1_C44	Q2FZF1	LSHRVUK	rpmF	50S ribosomal protein L32	yes	Modulator/Scaffolding/Adaptor		1.01405		0.748		0.314457		0.138424			1.14809	0.880019	0.804467	0.691534	0.309758	0.319155	0.233643	0.0432045
Q2FZ39_C277	Q2FZ39	IGNYUFDIFK	SAOUHSC_01214	Ribosome biogenesis GTPase A	yes	not assigned		1.21183		0.406555		0.296865		0.293727			1.21257	1.21108	0.4336	0.37951	0.394734	0.198997	0.316774	0.27068
Q2G238_C275	Q2G238	AFQQAVAUGTATAFDEDLATR	SAOUHSC_00707	Tagatose-6-phosphate kinase	no	Enzyme		1.19089		0.587957		0.309039		0.11974			1.25375	1.12803	0.650948	0.524966	0.328951	0.289126	0.144569	0.0949116
Q2G0B7_C8	Q2G0B7	IAVYUGASK	SAOUHSC_00688	Cytokinin riboside 5'-monophosphate phosphoribohydrolase	no	not assigned		1.33586		0.424216		0.162458		0.284673			1.46978	1.20195	0.419647	0.428786	0.275007	0.0499095	0.311852	0.257493
Q2G292_C147	Q2G292	ASGFUIYNDIAITAQYLAK	SAOUHSC_01849	Uncharacterized protein	no	not assigned		1.90539						0.298122			1.89736	1.91342					0.426318	0.169925
Q2FWB5_C68	Q2FWB5	VGDQVIFYQVQTDTGLLGUGEIISVETGAQNK	SAOUHSC_02383	Uncharacterized protein	no	not assigned		1.18022		0.557708				0.462518			1.26939	1.09106	0.576183	0.539233			0.418028	0.507008
Q2FYG6_C262	Q2FYG6	EFEEUIQIIR	SAOUHSC_01486	Heptaprenyl diphosphate syntase component II, putative	no	Enzyme		1.63583						0.562748			1.81287	1.4588					0.424099	0.701396
Q2G0G1_C145	Q2G0G1	LDPAAASSITUAGVTTYK	adh	Alcohol dehydrogenase	no	Enzyme	Functional site	0.730993		0.668705		0.532543		0.26523			0.83463	0.627355	0.691926	0.645483	0.554077	0.511009	0.320484	0.209977
Q2FZ74_C299	Q2FZ74	EALLEGLLDGTIDUIATDHAPHAR	pyrC	Dihydroorotase	no	Enzyme	Functional site	1.45335		0.318256		0.0405314		0.381651			1.36435	1.54236	0.358171	0.278342	0.0350608	0.046002	0.358509	0.404794
Q2G2Q2_C93	Q2G2Q2	ISQHDIDYUIVVNFSSR	SAOUHSC_01249	Riboflavin biosynthesis protein	yes	Enzyme		1.50862						0.684269			1.54008	1.47716					0.637007	0.731531
Q2FZT1_C7	Q2FZT1	MQPHLIULDLDGTLLNDNKEISSYTK	SAOUHSC_00909	Uncharacterized protein	no	not assigned		1.02381		0.59737		0.255558		0.315667			1.04264	1.00497	0.46634	0.728399	0.0123541	0.498761	0.367818	0.263515
Q2FZD3_C378	Q2FZD3	NVYUDIGDEQSIEQSLSTFSSHMTNIVEILK	mutS2	Endonuclease MutS2	no	Gene expression and Nucleic acid binding		1.66451						0.521302			1.79019	1.53884					0.673556	0.369048
Q2FVZ4_C70	Q2FVZ4	LPYTLUYISR	femX	Lipid II:glycine glycyltransferase	yes	Enzyme		1.70532						0.477892			1.58991	1.82073					0.501923	0.45386
Q2G164_C205	Q2G164	EALNFLUAYTTK	SAOUHSC_00291	PfkB family carbohydrate kinase family, putative	no	Enzyme		1.6803						0.50138			1.99099	1.36961					0.521151	0.481609
Q53700_C72	Q53700	DYLEDDPEGFINFUHK	cobB	NAD-dependent protein deacetylase	no	Enzyme		1.5779						0.592014			1.64039	1.51541					0.593402	0.590626
Q2FXW5_C207	Q2FXW5	GGCUQSCR	SAOUHSC_01716	Uncharacterized protein	no	Enzyme		1.17691		0.664285				0.327799			1.26303	1.09079	0.712023	0.616546			0.364348	0.29125
Q2G2S0_C199	Q2G2S0	MSGAVGTFANIPPEIESYVUK	purB	Adenylosuccinate lyase	no	Enzyme		1.00728		1.29917		0.155078		-0.293804			0.898866	1.1157	1.12035	1.47799	0.284277	0.0258793	-0.218833	-0.368775
Q2G045_C77	Q2G045	KLURPETPAIIVTR	hprK	HPr kinase/phosphorylase	yes	Enzyme		1.33586		0.536957				0.292636			1.39083	1.2809	0.557091	0.516822			0.383386	0.201885
Q2G0M8_C142	Q2G0M8	NDAILSDELNHASIIDGUR	SAOUHSC_00532	Uncharacterized protein	no	not assigned		1.03382		0.536933		0.344899		0.242419			1.13573	0.93191	0.60065	0.473215	0.369718	0.32008	0.283329	0.201508
Q2FZY4_C128	Q2FZY4	IKUATLAWK	SAOUHSC_00850	Uncharacterized protein	yes	Enzyme		1.13757		0.443902		0.365858		0.209432			1.19163	1.08352	0.396927	0.490878	0.347666	0.38405	0.268434	0.15043
P47768_C624	P47768	QVVSAATAUIPFLENDDSNR	rpoB	DNA-directed RNA polymerase subunit beta	yes	Gene expression and Nucleic acid binding		1.41685		0.467794		0.138566		0.133206			1.60056	1.23315	0.420078	0.515511	0.176961	0.10017	0.218595	0.0478175
Q2FXF5_C15	Q2FXF5	TIYFICTGNSUR	arsC	Arsenate reductase	no	Enzyme	Functional site	1.17533		0.725284				0.254454			1.36334	0.987321	0.827169	0.623399			0.361993	0.146916
Q2G227_C177	Q2G227	TGDLIVYTSADPVLQIAAHEDIIPLEELYDIUEK	deoB	Phosphopentomutase	no	Enzyme		0.825456		0.49167		0.560228		0.273154			0.821955	0.828956	0.551984	0.431356	0.678973	0.441483	0.334797	0.211511
Q2FZ22_C98	Q2FZ22	GTADYMGMLATVMNALALQDSLEQLDUDTR	pyrH	Uridylate kinase	yes	Enzyme		1.29724		0.425237		0.24996		0.17643			1.36692	1.22756	0.447315	0.403159	0.259544	0.240375	0.298776	0.0540844
Q2FWL2_C14	Q2FWL2	DILILAVETSUDETSVSVIK	tsaD	tRNA N6-adenosine threonylcarbamoyltransferase	yes	Enzyme		1.88408						0.263967			1.94465	1.8235					0.271954	0.255981
Q2FZZ3_C61	Q2FZZ3	IDLNFYPQFUK	SAOUHSC_00841	Uncharacterized protein	no	Enzyme		1.11358		0.889515				0.135556			1.13685	1.09031	0.706376	1.07265			0.21661	0.0545012
Q2FZD8_C120	Q2FZD8	SEGMIUSLQEIGISSNYIPK	pheT	Phenylalanine--tRNA ligase beta subunit	yes	Gene expression and Nucleic acid binding		0.929124		0.652701		0.376063		0.17859			1.04439	0.813853	0.633385	0.672018	0.333882	0.418244	0.235237	0.121944
Q2FXK4_C171	Q2FXK4	LNTLGSIYELGVLUSK	SAOUHSC_01830	Uncharacterized protein	no	Enzyme		1.70495						0.430175			1.57783	1.83208					0.297485	0.562865
Q2FYG1_C43	Q2FYG1	NQDAVDELNTUHTNK	gpsA	Glycerol-3-phosphate dehydrogenase [NAD(P)+]	no	Enzyme		1.34025		0.512485		0.158771		0.121233			1.34156	1.33894	0.583096	0.441874	0.128947	0.188595	0.191028	0.0514382
Q2G0T6_C46	Q2G0T6	KSPUYNFELEVIAK	SAOUHSC_00441	Uncharacterized protein	no	not assigned		0.691026		0.735881		0.599227		0.105668			0.759497	0.622556	0.760178	0.711583	0.660016	0.538439	0.111031	0.100305
Q2G039_C38	Q2G039	SLVIQCLEDMGYFUVDNLPPVLLPK	SAOUHSC_00787	Nucleotide-binding protein SAOUHSC_00787	no	not assigned		0.972831		0.694038		0.265526		0.197809			1.08093	0.864731	0.742006	0.64607	0.362666	0.168385	0.244278	0.151339
Q2FZ31_C191	Q2FZ31	YDKGEAAYLNUPMTEDEFNR	trmFO	Methylenetetrahydrofolate--tRNA-(uracil-5-)-methyltransferase TrmFO	no	Gene expression and Nucleic acid binding		1.1441		1.11138		0.244923		-0.379428			1.18218	1.10601	1.06728	1.15547	0.25806	0.231785	-0.406235	-0.352621
Q2FWX5_C231	Q2FWX5	YDNIUTNHFEILTHENR	SAOUHSC_02146	Uncharacterized protein	no	not assigned		1.87758						0.233137			1.95977	1.79539					0.32458	0.141694
Q2G0N5_C355	Q2G0N5	MYQUGLPK	rpoC	DNA-directed RNA polymerase subunit beta'	yes	Gene expression and Nucleic acid binding		1.78263						0.322515			1.91533	1.64994					0.347779	0.29725
Q2G1M1_C155	Q2G1M1	IINATSQAGVEGNPGLSLYUSTK	SAOUHSC_00086	3-ketoacyl-acyl carrier protein reductase, putative	no	Enzyme		1.02547		0.632609		0.335876		0.0940324			1.10856	0.942383	0.642101	0.623118	0.372506	0.299245	0.0799754	0.108089
Q2FVM0_C324	Q2FVM0	ADANTVLUH	SAOUHSC_02682	Uroporphyrin-III C-methyltransferase, putative	no	Enzyme				0.840309		0.774828		0.46709					1.02648	0.65414	0.679784	0.869871	0.366199	0.56798
Q2G2W9_C198	Q2G2W9	ISGAUGR	SAOUHSC_00455	Uncharacterized protein	no	not assigned		1.16931		0.682337				0.224289			1.33021	1.00842	0.742869	0.621806			0.328492	0.120086
Q2FZJ4_C180	Q2FZJ4	LIETSEUVAEK	purK	N5-carboxyaminoimidazole ribonucleotide synthase	no	Enzyme	Functional site	1.18695		0.809634		0.185003		-0.106699			1.2345	1.1394	0.92372	0.695548	0.264596	0.10541	-0.0910642	-0.122334
Q2G1J3_C358	Q2G1J3	IUEAIEYYFGLR	SAOUHSC_00129	UDP-N-acetylglucosamine 2-epimerase	no	Enzyme		1.04163		0.557103		0.462501		0.0133005			1.3715	0.711759	0.627233	0.486972	0.52687	0.398131	0.0617071	-0.0351061
O05154_C69	O05154	HISLIQLQNASIATUINK	tagX	Putative glycosyltransferase TagX	no	Enzyme		1.66402						0.405945			1.79352	1.53451					0.384713	0.427177
Q2FVX8_C34	Q2FVX8	DFDTDKGGQUVR	SAOUHSC_02544	Molybdenum cofactor biosynthesis protein B	no	not assigned		1.27591		0.618904				0.167306			1.46668	1.08515	0.784956	0.452853			0.239015	0.0955968
Q2FXA5_C451	Q2FXA5	VTGASFEAVGLPDUITQGK	SAOUHSC_01960	Protoporphyrinogen oxidase	no	Enzyme		1.51143		0.509687		0.0965051		-0.0567431			1.69185	1.33102	0.496616	0.522759	-0.0122571	0.205267	-0.00939361	-0.104093
Q2FVV9_C157	Q2FVV9	CVEAUQDIEVNETIR	SAOUHSC_02582	Putative formate dehydrogenase SAOUHSC_02582	no	Enzyme	Functional site	0.836871		0.851173				0.372603			0.964805	0.708938	0.70726	0.995086			0.290188	0.455018
Q2FZ72_C281	Q2FZ72	ALGIEGGUNVQLALDPHSFDYYIIEVNPR	carB	Carbamoyl-phosphate synthase large chain	no	Enzyme	Functional site	1.47655				0.795602		-0.215531			1.54701	1.4061			0.863066	0.728138	-0.205513	-0.225548
Q2G1E1_C7	Q2G1E1	VVIUDDER	SAOUHSC_00184	Uncharacterized response regulatory protein SAOUHSC_00184	no	Gene expression and Nucleic acid binding		1.68868						0.365108			1.83115	1.54622					0.460585	0.269632
Q2FV14_C267	Q2FV14	YQINVLCUTPTEYR	SAOUHSC_02929	Acetyl-CoA synthetase, putative	no	Enzyme		1.02069		0.548023		0.30528		0.17912			1.21437	0.827006	0.533962	0.562084	0.374956	0.235605	0.23842	0.119821
Q2G2A7_C260	Q2G2A7	DYVVNIYGQDFEUVDMGIPENK	potA	Spermidine/putrescine import ATP-binding protein PotA	no	Receptor/Transporter/Channel		1.86783						0.184693			1.98754	1.74812					0.281787	0.0875986
Q2G0Q8_C85	Q2G0Q8	IKPGDTIVEPTSGNTGIGLAFVUAAK	SAOUHSC_00488	Cysteine synthase	no	Enzyme		1.06663		0.460238		0.409495		0.115484			1.0719	1.06136	0.593019	0.327457	0.418999	0.399991	0.147176	0.083792
Q2G078_C430	Q2G078	DISUNLGSLNIVNVMESGK	SAOUHSC_00742	Ribonucleoside-diphosphate reductase	yes	Enzyme		1.42429		0.66607		-0.0365269		-0.00221948			1.51086	1.33771	0.712023	0.620117	-0.00381375	-0.06924	0.0732718	-0.0777108
Q2G242_C260	Q2G242	VUHVHGIK	SAOUHSC_00508	Uncharacterized protein	no	not assigned		1.15804		0.588721		0.327616		-0.0272949			1.32585	0.990229	0.461109	0.716332	0.189413	0.465818	-0.0157242	-0.0388657
Q2FVF9_C185	Q2FVF9	YGUALAIEVLK	SAOUHSC_02755	Uncharacterized protein	no	Enzyme	Functional site	1.70904						0.331062			1.86769	1.55039					0.498761	0.163363
Q2G248_C126	Q2G248	SFVFGPUSVESFEQVEAVAK	SAOUHSC_01852	Uncharacterized protein	no	Enzyme		1.07903		0.555338		0.190364		0.209061			1.16813	0.989938	0.602552	0.508124	0.220454	0.160275	0.273814	0.144307
Q2G037_C225	Q2G037	LVNUETANLNK	whiA	Putative sporulation transcription regulator WhiA	no	Gene expression and Nucleic acid binding		1.30314		0.420563		0.107502		0.202587			1.3653	1.24099	0.307662	0.533464	-0.0181473	0.233152	0.149129	0.256044
Q2G0T0_C121	Q2G0T0	EAVENHLQDUEK	rsmA	Ribosomal RNA small subunit methyltransferase A	no	Gene expression and Nucleic acid binding		1.07332		0.547482				0.411252			1.11168	1.03496	0.561302	0.533663			0.447402	0.375101
Q2FWD1_C175	Q2FWD1	ENVMYVHUTLLPYIK	pyrG	CTP synthase	yes	Enzyme		1.04684		0.291935				0.692132			1.14264	0.951053	0.459012	0.124857			0.744991	0.639273
Q2FWE4_C141	Q2FWE4	HVUVPVR	SAOUHSC_02355	UPF0340 protein SAOUHSC_02355	no	not assigned		1.00994		0.524992				0.488905			1.0285	0.99139	0.591392	0.458592			0.43957	0.53824
Q2FZB0_C187	Q2FZB0	NNVANALMQGAAIMGMNFHLVUPK	argF	Ornithine carbamoyltransferase	no	Enzyme		1.39028		0.521045		0.0521994		0.0590143			1.48949	1.29107	0.428464	0.613626	0.249749	-0.14535	0.107822	0.0102069
Q2FYH5_C106	Q2FYH5	AFKDUNIQYRPK	dinG	Probable ATP-dependent helicase DinG homolog	no	Gene expression and Nucleic acid binding		1.48769						0.5288			1.60886	1.36653					0.770364	0.287236
Q2FW29_C27	Q2FW29	VMVIUENPK	rpmJ	50S ribosomal protein L36	yes	Modulator/Scaffolding/Adaptor		1.21151		0.11338		0.0927087		0.588594			1.30287	1.12015	0.139865	0.0868947	0.0698146	0.115603	0.655535	0.521654
Q2FYG1_C320	Q2FYG1	VLFENISVKEUVK	gpsA	Glycerol-3-phosphate dehydrogenase [NAD(P)+]	no	Enzyme		1.26436		0.460095		0.125106		0.150002			1.39259	1.13613	0.429107	0.491083	0.188781	0.0614306	0.269033	0.0309716
Q2FV60_C274	Q2FV60	ILUTADFPSVAESLMPDFAPIK	crtN	Dehydrosqualene desaturase	no	Enzyme		1.85253						0.143984			2.06426	1.64081					0.353097	-0.0651288
Q2FWE6_C159	Q2FWE6	FMULIAAPEGVEK	upp	Uracil phosphoribosyltransferase	no	Enzyme		0.958697		0.588479		0.287708		0.160051			1.04271	0.874679	0.598937	0.578021	0.347552	0.227864	0.247928	0.0721744
Q2FXI5_C345	Q2FXI5	SLLSEAIUNLDNNQIETLQYK	SAOUHSC_01861	Uncharacterized protein	no	Enzyme		1.08318		0.552106		0.303407		0.0508204			1.17977	0.986593	0.759156	0.345056	0.405557	0.201257	0.00187429	0.0997665
Q2G0S2_C255	Q2G0S2	EVYAUCTHPVLSGPAK	prs	Ribose-phosphate pyrophosphokinase	yes	Enzyme		1.46281		0.255397		0.100089		0.167058			1.54649	1.37913	0.330595	0.180199	0.0315364	0.168642	0.251741	0.0823748
O05154_C173	O05154	FAELQUDETLANTYNHAILVK	tagX	Putative glycosyltransferase TagX	no	Enzyme		1.45965		0.445422		-0.0355687		0.11254			1.39764	1.52165	0.352307	0.538538	-0.149201	0.0780633	0.257011	-0.0319314
Q2FY59_C60	Q2FY59	LGANNLVUTMNSTIEEGEVPK	SAOUHSC_01606	Peptidase T, putative	no	Enzyme		1.7533						0.224948			1.61692	1.88967					0.347439	0.102457
Q2FZ66_C127	Q2FZ66	HDYGNSVCVTTQVGUR	rlmN	Probable dual-specificity RNA methyltransferase RlmN	no	Gene expression and Nucleic acid binding	Functional site	1.20711		0.609045		0.178537		-0.0180598			1.29813	1.1161	0.597317	0.620774	0.277509	0.0795658	0.0257376	-0.0618573
Q2G0A0_C105	Q2G0A0	GGUSPVGMK	SAOUHSC_00705	Cys-tRNA(Pro)/Cys-tRNA(Cys) deacylase	no	Gene expression and Nucleic acid binding		0.938521		0.698982		0.250284		0.0867411			1.01771	0.859334	0.734482	0.663481	0.244644	0.255924	0.119954	0.0535284
Q2FZA2_C201	Q2FZA2	QHSIIVGDSLTSDILGGINAGIATUWFNFR	SAOUHSC_01137	Uncharacterized protein	no	not assigned		1.17964		0.79403							0.843421	1.51586	0.753348	0.834711
Q2FY10_C33	Q2FY10	QUKNELLR	SAOUHSC_01664	Putative pyruvate, phosphate dikinase regulatory protein	no	Enzyme		1.51237		0.625876		0.000510556		-0.166027			1.60041	1.42433	0.673828	0.577924	0.0554733	-0.0544522	-0.104294	-0.22776
Q2FUR8_C69	Q2FUR8	GGFUYELNTFFK	SAOUHSC_03034	Uncharacterized protein	no	Enzyme		0.836075		0.621094		0.553203		-0.038988			0.870661	0.80149	0.778461	0.463727	0.566279	0.540126	-0.0778174	-0.000158705
Q2G0I3_C25	Q2G0I3	FNSSSLAELTULNPVQLR	SAOUHSC_00582	Uncharacterized protein	no	Gene expression and Nucleic acid binding		1.00932		0.789346		0.13404		0.0363639			1.10239	0.916247	0.749491	0.8292	0.185105	0.082975	0.134615	-0.0618874
Q2G268_C154	Q2G268	TQQNINILKEDGYHFIEPGSGFLAUGYVAK	SAOUHSC_01178	Coenzyme A biosynthesis bifunctional protein CoaBC	yes	Enzyme		0.785547		0.397661		0.499093		0.2817			0.952855	0.618239	0.330444	0.464877	0.3122	0.685985	0.336398	0.227002
Q2FWG3_C13	Q2FWG3	MFNQSYLNVYFIUGTSDVPSHR	thiE	Thiamine-phosphate synthase	no	Enzyme		1.41779						0.545548			1.53007	1.3055					0.573568	0.517528
Q2G1W2_C221	Q2G1W2	GIFSVMNYLLPMQDIMSMHUSANVGEK	pckA	Phosphoenolpyruvate carboxykinase (ATP)	no	Enzyme	Functional site			1.06802		0.895238							1.25108	0.88495	1.00447	0.786011
Q2G1Q4_C505	Q2G1Q4	NUESFSK	SAOUHSC_00049	Uncharacterized protein	no	not assigned		1.18819		0.658594				0.112264			1.19397	1.18242	0.681944	0.635244			0.272557	-0.0480293
Q2G0N5_C48	Q2G0N5	DGLFUER	rpoC	DNA-directed RNA polymerase subunit beta'	yes	Gene expression and Nucleic acid binding		1.1869		0.603076		0.0750604		0.0868454			1.27488	1.09893	0.54428	0.661872	0.0505179	0.0996028	0.106561	0.0671294
Q05615_C51	Q05615	AIMLASLAEGVSTIYKPLLGEDUR	aroA	3-phosphoshikimate 1-carboxyvinyltransferase	no	Enzyme		0.775288		0.863993		0.474262		-0.165215			0.703621	0.846954	0.891065	0.836921	0.495163	0.453361	-0.0606456	-0.269785
Q2G2D7_C242	Q2G2D7	VPVUGAISSYNHPEADIGPR	SAOUHSC_02447	Uncharacterized protein	no	Enzyme		1.16638		0.43684		0.146699		0.195306			1.2716	1.06115	0.482022	0.391658	0.162468	0.130931	0.255078	0.135535
Q2FWD6_C279	Q2FWD6	VVNNTGQVUTAGTR	SAOUHSC_02363	Putative aldehyde dehydrogenase SAOUHSC_02363	no	Enzyme	Functional site	1.3112		0.533474				0.099832			1.36418	1.25822	0.578021	0.488926			0.15562	0.0440443
Q2FV26_C128	Q2FV26	LYDLIMUHLQR	SAOUHSC_02913	Uncharacterized protein	no	Gene expression and Nucleic acid binding		1.63378						0.309273			1.76086	1.5067					0.423955	0.194591
Q2FWD4_C376	Q2FWD4	AGAULIIAGLIAEGVTTIYNVK	murA	UDP-N-acetylglucosamine 1-carboxyvinyltransferase	no	Enzyme		1.16619				0.743266		0.0299317			1.24154	1.09085			0.788936	0.697596	0.1149	-0.0550366
Q2G2C1_C675	Q2G2C1	ISEGTIUYTGDILNPER	SAOUHSC_01064	Pyruvate carboxylase	no	Enzyme		0.990723		0.30886		0.350781		0.285037			0.918081	1.06336	0.427928	0.189793	0.372841	0.328722	0.409798	0.160275
Q2FZX4_C272	Q2FZX4	HUQAGPLVR	lipA	Lipoyl synthase	no	Enzyme		1.25463		0.508561		0.0910958		0.0783888			1.37366	1.1356	0.554442	0.462681	0.0820213	0.10017	0.113298	0.0434797
Q2FZ55_C92	Q2FZ55	SGEADGUVSAGNTGALMSAGLFIVGR	plsX	Phosphate acyltransferase	yes	Enzyme		1.32562		0.573955		0.117015		-0.0879277			1.40964	1.2416	0.500088	0.647821	0.217107	0.0169241	-0.0173294	-0.158526
Q2FXJ0_C368	Q2FXJ0	VFLUEIFGSIR	murC	UDP-N-acetylmuramate--L-alanine ligase	yes	Enzyme		0.976183		0.365436		0.320244		0.25845			1.10125	0.851119	0.44276	0.288113	0.282843	0.357646	0.363396	0.153504
Q2FYM2_C303	Q2FYM2	DUDKKNFAEIEAEIANLAVK	odhB	Dihydrolipoyllysine-residue succinyltransferase component of 2-oxoglutarate dehydrogenase complex	no	Enzyme		1.1319		0.670928		0.324757		-0.21027			0.81295	1.45085	0.701048	0.640808	0.63988	0.00963382	-0.087168	-0.333372
Q2G2W9_C161	Q2G2W9	LLGGIGPUGR	SAOUHSC_00455	Uncharacterized protein	no	not assigned		0.97067		0.67686		0.147086		0.121259			1.11303	0.828307	0.730227	0.623492	0.213378	0.0807941	0.186627	0.0558898
Q2G255_C322	Q2G255	HGETGFVVDVGDUDSASDYAIR	SAOUHSC_01475	Uncharacterized protein	no	Enzyme		1.08298		0.415688		0.295541		0.119479			1.17044	0.995521	0.511873	0.319502	0.399773	0.19131	0.147697	0.0912598
Q2G0Y6_C248	Q2G0Y6	AIGDQLTUIFVDHGLLR	guaA	GMP synthase [glutamine-hydrolyzing]	yes	Enzyme		0.98327		0.281706		0.30829		0.329499			1.06798	0.898557	0.350158	0.213254	0.31429	0.30229	0.381726	0.277271
Q2FWE4_C69	Q2FWE4	ETGVTFAFQGUEHINR	SAOUHSC_02355	UPF0340 protein SAOUHSC_02355	no	not assigned		1.2481		0.431281		0.0908112		0.132327			1.37134	1.12486	0.439038	0.423524	0.108625	0.0729976	0.177599	0.0870554
Q2FXT9_C251	Q2FXT9	VLNDQUPTSVK	SAOUHSC_01744	Uncharacterized protein	no	Gene expression and Nucleic acid binding		1.10517		0.341682				0.451665			1.11962	1.09072	0.314986	0.368377			0.582556	0.320773
Q2FWE8_C193	Q2FWE8	DQGTIUIYVAIGQK	atpA	ATP synthase subunit alpha	no	Receptor/Transporter/Channel		1.42537						0.47011			1.46289	1.38786					0.426426	0.513794
Q2G0Q7_C94	Q2G0Q7	SEVAEAULK	SAOUHSC_00489	Dihydropteroate synthase	yes	Enzyme		1.05602		0.55249				0.281726			1.08311	1.02892	0.814673	0.290306			0.393526	0.169925
Q2G002_C216	Q2G002	TAQGVFGGALTYGUIGVPQAPGQIDVTDLK	aroD	3-dehydroquinate dehydratase	no	Enzyme		0.907509		0.419482		0.362896		0.192462			0.955685	0.859334	0.422556	0.416407	0.306146	0.419647	0.210389	0.174534
Q2FX22_C207	Q2FX22	VDIUEDYINLVSLNPK	SAOUHSC_02084	Phage repressor protein, putative	no	Gene expression and Nucleic acid binding		1.03004		0.197753		0.215118		0.439009			1.13045	0.929636	0.262599	0.132907	0.220857	0.20938	0.440036	0.437982
Q2G046_C122	Q2G046	VGKPYUPNHNIEIESQTVQQMVDR	uvrA	UvrABC system protein A	no	Gene expression and Nucleic acid binding		1.21076		0.583512				0.0861819			1.35485	1.06667	0.701416	0.465609			0.105276	0.067088
Q2FZH5_C365	Q2FZH5	LULAQQDIFR	SAOUHSC_01029	Phosphoenolpyruvate-protein phosphotransferase	no	Enzyme		1.14915		0.465817		0.163553		0.100083			1.27814	1.02016	0.568519	0.363115	0.187768	0.139339	0.197278	0.00288909
Q2FVY1_C130	Q2FVY1	NEEELQVLQQLSNVUYSINVR	SAOUHSC_02541	Molybdopterin-guanine dinucleotide biosynthesis protein MobB	no	not assigned		1.02468		0.192726		0.513653		0.142256			1.18574	0.863621	0.167229	0.218223	0.668573	0.358734	0.37128	-0.0867678
Q2G1Z8_C97	Q2G1Z8	YFGHUIDQTALSPK	polC	DNA polymerase III PolC-type	yes	Gene expression and Nucleic acid binding		1.64555						0.222651			1.63932	1.65178					0.320311	0.12499
Q2FXV6_C102	Q2FXV6	TPNPDVMUNK	mnmA	tRNA-specific 2-thiouridylase MnmA	yes	Enzyme	Functional site	1.61959		0.651491		-0.0730969		-0.33452			1.71879	1.5204	0.744867	0.558114	-0.0569231	-0.0892707	-0.304002	-0.365038
Q2G059_C138	Q2G059	EAVPUIVTLNYDQTGKFEYELASTHFMLR	SAOUHSC_00763	Uncharacterized protein	no	not assigned		1.80248		-0.0041121		0.0567877					1.97302	1.63194	-0.0772389	0.0690147	0.115033	-0.00145786
Q2FZI8_C88	Q2FZI8	HDSIGIDAVAMUVNDILTTGAEPLYFLDYIATNK	purM	Phosphoribosylformylglycinamidine cyclo-ligase	no	Enzyme						1.85452									1.5212	2.18783
Q2FY68_C244	Q2FY68	GGTTQAGLDTLSQYDLVSIFEDULNAAVDR	proC	Pyrroline-5-carboxylate reductase	no	Enzyme		1.07461		0.248024		0.173974		0.355092			1.23008	0.919149	0.310689	0.185359	0.20364	0.144307	0.382612	0.327572
Q2FWC6_C175	Q2FWC6	VRDEDFEEUDLITIEGSVFGEWLDELRDDHK	SAOUHSC_02372	Uncharacterized protein	no	not assigned				1.31371		0.535295							1.30451	1.32291	0.541019	0.529571
Q2FXR4_C143	Q2FXR4	FEGUYHGHSDSLLIK	hemL1	Glutamate-1-semialdehyde 2,1-aminomutase 1	no	Enzyme		0.918381		0.495102		0.260656		0.174824			0.981794	0.854967	0.559931	0.430274	0.288758	0.232554	0.218637	0.131011
Q2FXP7_C181	Q2FXP7	LELIDAIPEDENVTLYSQGDFTDLUR	thrS	Threonine--tRNA ligase	yes	Gene expression and Nucleic acid binding		1.63699						0.211742			1.69577	1.57821					0.256769	0.166715
Q2G0J0_C167	Q2G0J0	GDEQYIFGDUAINPELDSQGLAEIAVESAK	SAOUHSC_00574	Phosphate acetyltransferase	yes	Enzyme		1.45812						0.390281			1.54636	1.36989					0.388024	0.392537
Q2FV75_C130	Q2FV75	MSAQAVGGAVGSNPLSIIVPUHR	SAOUHSC_02861	Methylated-DNA--protein-cysteine methyltransferase	no	Gene expression and Nucleic acid binding	Functional site	1.05818		0.544779		0.13776		0.10482			1.16053	0.955834	0.547746	0.541812	0.152119	0.123401	0.148348	0.0612923
Q2G2C4_C196	Q2G2C4	EILSDAUK	tarI'	Ribitol-5-phosphate cytidylyltransferase 2	no	Enzyme		0.873057		0.590035		0.236769		0.141608			0.981925	0.76419	0.692368	0.487702	0.351737	0.121802	0.182772	0.100445
Q2G2P8_C147	Q2G2P8	LKPQLPTUR	nnrD	ADP-dependent (S)-NAD(P)H-hydrate dehydratase	no	Enzyme				0.953317		0.884386							1.18504	0.721591	0.544485	1.22429
Q2FZV7_C185	Q2FZV7	IPELUSK	SAOUHSC_00878	NADH dehydrogenase-like protein SAOUHSC_00878	no	Enzyme		0.847478		0.861992		0.341816		-0.217926			0.914375	0.780581	0.70255	1.02143	0.396159	0.287472	-0.12417	-0.311682
Q2FYY6_C291	Q2FYY6	GFTAVUNPLVNSYK	SAOUHSC_01287	Glutamine synthetase	yes	Enzyme		1.55169						0.278302			1.74951	1.35386					0.266031	0.290572
P0A0K3_C105	P0A0K3	NDVPTFAIUHGPQILIDTDDLK	SAOUHSC_02013	Uncharacterized protein SAOUHSC_02013	no	not assigned		1.20037		0.405588		0.209194		0.0129306			1.37606	1.02467	0.429458	0.381718	0.242348	0.176041	0.0740944	-0.0482332
Q2G234_C131	Q2G234	YAGYDNUGDPAEK	SAOUHSC_02134	Nitric oxide synthase oxygenase	no	Enzyme		1.07345		0.288006		0.313166		0.153307			1.09712	1.04978	0.332366	0.243646	0.274484	0.351848	0.178984	0.127629
Q2FV95_C112	Q2FV95	GAIATNEVNAAMGIIUATPTAGSSGTIPGALFK	SAOUHSC_02839	L-serine dehydratase, iron-sulfur-dependent, alpha subunit	no	Enzyme		1.01794		0.300843		0.276372		0.227146			1.09146	0.944409	0.417596	0.18409	0.412619	0.140124	0.198368	0.255924
Q2G0S8_C147	Q2G0S8	TALUTGR	SAOUHSC_00466	Putative 4-diphosphocytidyl-2-C-methyl-D-erythritol kinase	no	Enzyme		1.20086		0.675193				-0.0546573			1.25358	1.14814	0.843582	0.506805			-0.0485598	-0.0607547
Q2FVM3_C27	Q2FVM3	YQESFGYMAQQLUFPEK	SAOUHSC_02679	Respiratory nitrate reductase, delta subunit, putative	no	Modulator/Scaffolding/Adaptor				0.889475		0.475203		0.452238					0.9911	0.78785	0.485633	0.464773	0.534759	0.369718
Q2G2R5_C49	Q2G2R5	ADALIEEGNNUIAEAHR	SAOUHSC_02451	PTS system lactose-specific IIA component, putative	no	not assigned		1.08852		0.283876		0.207315		0.234978			1.12267	1.05436	0.186247	0.381505	0.436375	-0.0217458	0.228603	0.241352
Q2FUX7_C210	Q2FUX7	DUPFNIEGGDELVLSK	arcA	Arginine deiminase	no	Enzyme		1.59579		0.40051		-0.0745284		-0.108134			1.68324	1.50834	0.455965	0.345056	-0.0512896	-0.0977672	-0.0378577	-0.17841
Q2FVT6_C215	Q2FVT6	QYADFADIFUETGVFTIEQSQHYMQK	hutI	Imidazolonepropionase	no	Enzyme		1.18471		0.290652		0.101679		0.230873			1.27822	1.09119	0.389236	0.192068	0.139993	0.0633649	0.285935	0.175812
Q2G1R6_C408	Q2G1R6	IYVHUQSGVR	SAOUHSC_00036	Uncharacterized protein	no	not assigned		1.68183						0.122101			1.85563	1.50802					0.086512	0.157691
Q2G1V2_C150	Q2G1V2	AHEELQIUAQNLQISKPTYAR	SAOUHSC_02685	Uncharacterized protein	no	Enzyme		1.12819				0.475164		0.1987			1.19868	1.05769			0.650029	0.300299	0.347212	0.0501882
Q2G1E1_C248	Q2G1E1	YLQMSPSDYUK	SAOUHSC_00184	Uncharacterized response regulatory protein SAOUHSC_00184	no	Gene expression and Nucleic acid binding		1.61723						0.184409			1.63347	1.60098					0.243971	0.124847
Q2FXI5_C187	Q2FXI5	YGUVLAIEILELLK	SAOUHSC_01861	Uncharacterized protein	no	Enzyme	Functional site			1.79944									2.46472	1.13416
Q2G296_C484	Q2G296	ENGWDNYPVUMAK	fhs	Formate--tetrahydrofolate ligase	no	Enzyme		0.905813		0.403545		0.213913		0.274958			0.966019	0.845607	0.410676	0.396414	0.389089	0.0387366	0.314659	0.235257
Q2G0R8_C645	Q2G0R8	LLUGDVGYGK	mfd	Transcription-repair-coupling factor	no	Gene expression and Nucleic acid binding	Functional site	1.67485						0.121188			2.02478	1.32493					0.259401	-0.0170255
Q2G1D8_C383	Q2G1D8	TYUAKMSIK	pflB	Formate acetyltransferase	no	Enzyme		1.26453		0.259899		0.0786486		0.192627			1.38455	1.1445	0.337996	0.181802	0.0618453	0.0954519	0.212383	0.172872
Q2FWG2_C190	Q2FWG2	VTGAGULLGGVIAGFLFR	thiM	Hydroxyethylthiazole kinase	no	Enzyme	Functional site	1.11869		0.330766		0.135695		0.206301			1.22188	1.0155	0.35061	0.310922	0.161694	0.109695	0.27274	0.139862
Q2FXN3_C230	Q2FXN3	GLIPNVDFYSASVYHUMEIPHDLFTPIFAVSR	SAOUHSC_01802	Uncharacterized protein	no	Enzyme		0.990811		0.300822		0.252113		0.244367			1.22076	0.76086	0.359071	0.242572	0.25181	0.252416	0.393416	0.0953168
Q2FXI6_C27	Q2FXI6	QGATVFEFTAGWUPDCR	SAOUHSC_01860	Uncharacterized protein	no	Enzyme		1.69805						0.0892763			1.89902	1.49708					0.152248	0.0263043
Q2G144_C7	Q2G144	ILVVUGHGLGSSFMVEMNAQEALR	SAOUHSC_00311	Uncharacterized protein	no	Receptor/Transporter/Channel		0.968497		0.064823		0.232808		0.518133			1.62793	0.30906	0.183709	-0.0540627	0.160404	0.305212	0.107688	0.928579
Q2FZU6_C216	Q2FZU6	ELUDEHNVLFIADEIQAGLGR	rocD	Ornithine aminotransferase	no	Enzyme		1.05013		0.284186		0.204866		0.241204			1.10988	0.990371	0.354069	0.214303	0.206303	0.203429	0.276707	0.205701
Q2G255_C262	Q2G255	QDUVSEFYQLSDLVLLLSEK	SAOUHSC_01475	Uncharacterized protein	no	Enzyme				0.889398		0.550429		0.336893					0.766298	1.0125	0.677441	0.423417	0.34426	0.329525
Q2G0E0_C63	Q2G0E0	YDGFYWUR	graR	Response regulator protein GraR	no	Gene expression and Nucleic acid binding		1.32184		0.216139				0.237631			1.30334	1.34033	0.261711	0.170566			0.283448	0.191815
Q2G0U9_C235	Q2G0U9	GYNTPVFSHQNLYTWGQUTYHVFNR	sle1	N-acetylmuramoyl-L-alanine amidase sle1	no	Enzyme		0.809437		0.547693		0.177045		0.240662			0.872618	0.746257	0.844787	0.250598	0.388294	-0.0342046	0.332428	0.148897
Q2G2L2_C97	Q2G2L2	AHIDLDFPISVEQVILSGUYK	SAOUHSC_00637	Uncharacterized protein	no	not assigned		1.35221						0.421285			1.52492	1.17951					0.630312	0.212258
Q2FZ02_C227	Q2FZ02	FUTYCIVPFTR	miaB	tRNA-2-methylthio-N(6)-dimethylallyladenosine synthase	no	not assigned	Functional site	1.43253						0.339521			1.29519	1.56986					0.417812	0.26123
Q2G0T3_C83	Q2G0T3	SVIUVVEDDKDVIAMEK	recR	Recombination protein RecR	no	Gene expression and Nucleic acid binding		1.42287						0.346146			1.61013	1.2356					0.415975	0.276318
Q2FXJ7_C38	Q2FXJ7	YVVTUTHESYNEVIMLGMALYPNQIHYMAK	SAOUHSC_01837	1-acyl-sn-glycerol-3-phosphate acyltransferases domain protein	yes	Enzyme		1.76794									1.16356	2.37231
Q2FXG2_C92	Q2FXG2	GATSHYDYVUNEVAK	ribH	6,7-dimethyl-8-ribityllumazine synthase	no	Enzyme	Functional site	1.02045		0.391628		0.265943		0.0896758			1.09822	0.942683	0.509442	0.273814	0.131458	0.400429	0.180275	-0.00092362
Q2FX49_C69	Q2FX49	TEMAVTNYLUSIR	SAOUHSC_02051	Int gene activator RinA	no	not assigned		1.74543						0.0212733			1.83564	1.65521					-0.0374288	0.0799754
Q2FZ73_C248	Q2FZ73	IPFFGIULGHQLFALSQGASSFK	carA	Carbamoyl-phosphate synthase small chain	no	Enzyme	Functional site	1.16202		0.56423		0.0786989		-0.0392368			1.2667	1.05735	0.566474	0.561986	0.126709	0.0306892	-0.0840891	0.00561557
Q2G1T1_C150	Q2G1T1	YULKLDEALK	SAOUHSC_00827	Uncharacterized protein	no	not assigned		1.11189		0.652834							0.995231	1.22854	0.594262	0.711407
Q2FWW3_C407	Q2FWW3	IAFSUVEK	SAOUHSC_02158	Uncharacterized protein	no	Enzyme		1.17343		0.496036		0.0566739		0.0355467			1.22663	1.12022	0.514602	0.47747	0.125387	-0.0120389	0.0399806	0.0311128
Q2FXY0_C37	Q2FXY0	NKPGFVPEHNMFRDDVIUR	SAOUHSC_01700	Uncharacterized protein	yes	not assigned		1.13581				0.624975					1.36126	0.910349			0.500802	0.749148
Q2FYK3_C289	Q2FYK3	TAGDUISDLGYPEALPEMVLLLDDPQK	cvfC	Conserved virulence factor C	no	not assigned		1.24049		0.501165		-0.11202		0.128347			1.38764	1.09335	0.53057	0.47176	-0.146771	-0.0772693	0.206523	0.0501702
Q2G2P2_C86	Q2G2P2	HUALQVYAEHYPIVGK	SAOUHSC_00204	Globin domain protein	no	Enzyme		0.914839		0.192686		0.341059		0.306708			1.03267	0.797013	0.198871	0.186501	0.347779	0.334339	0.352307	0.26111
Q2G2E9_C191	Q2G2E9	TMTUGTSISLR	SAOUHSC_00030	Uncharacterized protein	no	not assigned		1.35322						0.399682			1.45191	1.25453					0.481712	0.317651
Q2G2A4_C346	Q2G2A4	GATUTISNIGSAGGQWFTPVINHPEVAILGIGR	SAOUHSC_01042	Dihydrolipoamide acetyltransferase component of pyruvate dehydrogenase complex	no	Enzyme		1.08907		0.338766		0.152874		0.169546			1.18428	0.993855	0.32964	0.347892	0.202888	0.10286	0.222063	0.11703
Q2FY47_C46	Q2FY47	LSAAUDTTLK	xseB	Exodeoxyribonuclease 7 small subunit	no	Gene expression and Nucleic acid binding		1.07017		0.373744		0.185572		0.119632			1.17995	0.960392	0.394843	0.352646	0.211386	0.159758	0.118713	0.12055
Q2G099_C141	Q2G099	YHSLIADGATFPNULK	SAOUHSC_00722	Para-aminobenzoate synthase, glutamine amidotransferase, component II, putative	no	Enzyme		1.44794						0.300431			1.56682	1.32907					0.511772	0.0890913
Q2FZZ9_C10	Q2FZZ9	NUTTCKK	SAOUHSC_00835	Uncharacterized protein	no	not assigned		1.23846		-0.297279		0.598954		0.207775			1.28599	1.19093	-0.135855	-0.458703	0.766553	0.431356	0.288181	0.127369
Q2G2S7_C90	Q2G2S7	LQNEQIFVYVUHGNHDPLSSK	SAOUHSC_01975	Uncharacterized protein	no	not assigned		1.02388				0.277694		0.446141			1.25423	0.793521			0.426962	0.128425	0.506907	0.385376
Q2G1N2_C147	Q2G1N2	DLTIIGUGLIGDK	SAOUHSC_00076	Ornithine cyclodeaminase, putative	no	Enzyme		1.58151						0.164584			1.56638	1.59665					0.257131	0.0720372
Q2G0S8_C209	Q2G0S8	DYQQLUQSLSNR	SAOUHSC_00466	Putative 4-diphosphocytidyl-2-C-methyl-D-erythritol kinase	no	Enzyme		1.50004						0.245271			1.40458	1.5955					0.211627	0.278916
Q2FV02_C585	Q2FV02	TUGYLGNPVQRPVIK	SAOUHSC_02942	Anaerobic ribonucleoside-triphosphate reductase, putative	no	Enzyme		1.73729									1.74214	1.73244
Q2G2C7_C39	Q2G2C7	VHYAGIUGTDIHTYEGHYK	SAOUHSC_00217	Sorbitol dehydrogenase, putative	no	Enzyme		0.961479		0.581623		0.176335		0.0163185			1.05004	0.872918	0.455523	0.707724	0.343986	0.00868353	0.175283	-0.142646
Q2FYV1_C101	Q2FYV1	QDFDEIVDYURDR	SAOUHSC_01323	Uncharacterized protein	no	not assigned		1.03041		0.25607		0.151878		0.297109			1.09861	0.962215	0.430392	0.0817487	0.0635029	0.240253	0.351402	0.242816
Q2FZ61_C7	Q2FZ61	MHINLLUSDR	SAOUHSC_01190	Uncharacterized protein	yes	Enzyme		1.2365		0.14428		0.113425		0.235254			1.37479	1.09822	0.0528332	0.235727	0.0931545	0.133695	0.246591	0.223917
Q2G0P5_C311	Q2G0P5	GELQUIGATTLDEYR	clpC	ATP-dependent Clp protease ATP-binding subunit ClpC	no	not assigned		1.10532		0.40857		0.1135		0.101652			1.21399	0.996652	0.277509	0.53963	0.161565	0.0654344	0.162425	0.0408783
Q2FV63_C13	Q2FV63	SQEILNVEGMSUGHCK	copZ	Copper chaperone CopZ	no	not assigned	Functional site	1.52132						0.206385			1.67924	1.3634					0.251204	0.161565
Q2FXN6_C65	Q2FXN6	DGIDVUK	SAOUHSC_01800	Two-component response regulator, putative	no	Gene expression and Nucleic acid binding		1.00936		0.298554		0.313866		0.103722			1.0376	0.981114	0.365918	0.23119	0.200679	0.427052	0.108603	0.0988409
Q2G0K8_C239	Q2G0K8	HPNVEIYLDDEAUPK	nagB	Glucosamine-6-phosphate deaminase	no	Enzyme		1.02698		0.381739		0.157215		0.157586			1.09687	0.957097	0.463413	0.300065	0.18574	0.128689	0.241352	0.0738202
Q2FXL5_C206	Q2FXL5	IISUHIGNGASIAAIDGGK	ackA	Acetate kinase	no	Enzyme	Functional site	0.91668		0.416488		0.167859		0.220126			0.999134	0.834226	0.480782	0.352194	0.280244	0.0554733	0.288654	0.151599
Q2G0N0_C82	Q2G0N0	HYAHVDUPGHADYVK	tuf	Elongation factor Tu	yes	Gene expression and Nucleic acid binding	Functional site	1.0781		0.365457		0.174975		0.0965813			1.18144	0.97476	0.413671	0.317244	0.222054	0.127896	0.141883	0.0512791
Q2FY27_C108	Q2FY27	EIFEQFVDUPVYVDNDANIAALGEK	SAOUHSC_01646	Glucokinase, putative	no	Enzyme		0.676243		0.593434		0.328924		0.11621			0.751549	0.600936	0.627327	0.559541	0.376179	0.281669	0.181675	0.0507455
Q2G066_C30	Q2G066	HSETUPISANAYDQFNK	SAOUHSC_00755	Uncharacterized protein	no	not assigned		1.0413		0.295301		0.164084		0.21057			1.30422	0.778377	0.327687	0.262914	0.266876	0.0612923	0.277747	0.143393
Q2FUX8_C277	Q2FUX8	DSTIFLHULPAFHDTNTLYGQEIYEK	argF	Ornithine carbamoyltransferase	no	Enzyme		0.786106		0.231535		0.638436		0.0501888			0.762221	0.809991	0.325041	0.138028	0.667211	0.60966	0.106348	-0.00597067
Q2FXR2_C79	Q2FXR2	TAQYUESLGIR	SAOUHSC_01773	Uroporphyrinogen-III synthase, putative	no	Enzyme		1.26105						0.445053			1.16247	1.35963					0.489132	0.400975
Q2FY51_C43	Q2FY51	QLLGGTULHK	SAOUHSC_01614	Dihydrolipoyl dehydrogenase	no	Enzyme		0.435723		0.451694		0.932041		-0.114205			0.349592	0.521855	0.370722	0.532666	0.437441	1.42664	-0.0472937	-0.181117
Q2G1G7_C248	Q2G1G7	HFTLCIEEVFDTTVTYLFDMUHK	SAOUHSC_00156	Uncharacterized protein	no	Enzyme				1.70522									2.12552	1.28493
Q2G1J4_C176	Q2G1J4	IIGGVTEAUIEAGKR	SAOUHSC_00128	Cap5O protein/UDP-N-acetyl-D-mannosaminuronic acid dehydrogenase	no	Enzyme		0.729935		0.932269				0.0413565			0.795933	0.663937	0.939603	0.924936			0.168899	-0.0861857
Q93T05_C615	Q93T05	LREDVAIMMSUK	mutL	DNA mismatch repair protein MutL	no	Gene expression and Nucleic acid binding		1.58013						0.120293			1.68415	1.47612					0.157504	0.0830824
Q2FV74_C295	Q2FV74	AUVDLSIQYIPQR	clpL	ATP-dependent Clp protease ATP-binding subunit ClpL	no	not assigned		0.881075		0.37543		0.265093		0.168692			1.0018	0.760349	0.420186	0.330673	0.318924	0.211261	0.228357	0.109026
Q2G067_C133	Q2G067	FIGLUNQSIK	SAOUHSC_00754	Uncharacterized protein	no	not assigned		1.30915						0.380089			1.45012	1.16819					0.501719	0.258459
Q2G2W9_C89	Q2G2W9	DAENALILUK	SAOUHSC_00455	Uncharacterized protein	no	not assigned		1.57586						0.109049			1.6196	1.53212					0.25084	-0.0327428
Q2G059_C95	Q2G059	KLDVHNAUVVVTR	SAOUHSC_00763	Uncharacterized protein	no	not assigned		0.855093		0.218333		0.322637		0.284861			0.98083	0.729357	0.212009	0.224658	0.305795	0.339479	0.314523	0.255199
Q2FVM3_C185	Q2FVM3	LULTSPK	SAOUHSC_02679	Respiratory nitrate reductase, delta subunit, putative	no	Modulator/Scaffolding/Adaptor		1.07469						0.605589			1.38427	0.76511					0.604925	0.606253
Q2FXZ4_C304	Q2FXZ4	IISEQHDNGWVULVGQK	prmA	Ribosomal protein L11 methyltransferase	no	Enzyme		1.35963						0.318603			1.56837	1.15088					0.261471	0.375735
Q2FV14_C96	Q2FV14	LGVAIIPUSEMLR	SAOUHSC_02929	Acetyl-CoA synthetase, putative	no	Enzyme		1.01474		0.333923		0.16254		0.166778			1.13914	0.89033	0.373063	0.294782	0.220206	0.104873	0.265917	0.0676387
Q2FWA0_C2	Q2FWA0	UGIVGYIGYDNAK	glmS	Glutamine--fructose-6-phosphate aminotransferase [isomerizing]	yes	Enzyme	Functional site	1.09422		0.677309		-0.154563		0.057572			1.08194	1.10649	0.554781	0.799837	-0.152677	-0.15645	0.0755582	0.0395858
Q2FVV9_C934	Q2FVV9	TSURLEVITK	SAOUHSC_02582	Putative formate dehydrogenase SAOUHSC_02582	no	Enzyme		1.46257						0.211504			1.55631	1.36882					0.287472	0.135535
Q2FXJ9_C125	Q2FXJ9	LQNISTNLADUFNLNEQLPLQFLDNVK	SAOUHSC_01835	Uncharacterized protein	no	not assigned		0.982113		0.311395		0.20978		0.170587			1.08821	0.876016	0.28948	0.333309	0.249506	0.170053	0.229342	0.111833
Q2FYZ5_C111	Q2FYZ5	QTQSIUSELK	glpK	Glycerol kinase	no	Enzyme		0.541382		1.02791		0.549084		-0.447722			0.612163	0.470601	1.0916	0.964214	0.588123	0.510045	-0.40442	-0.491024
Q2FYJ3_C244	Q2FYJ3	VDSTIADGUDVK	tdcB	L-threonine dehydratase catabolic TdcB	no	Enzyme		1.15118		0.235192		0.109293		0.173187			1.21406	1.0883	0.267253	0.203132	0.0883954	0.130191	0.25114	0.0952338
Q2G2Q7_C100	Q2G2Q7	NLFKEEGLEPWTSUEFDFTR	SAOUHSC_00276	Uncharacterized protein	no	not assigned		1.31228						0.352734			1.1635	1.46106					0.322966	0.382501
Q2FYY6_C309	Q2FYY6	LVPGYEAPUYIAWSGK	SAOUHSC_01287	Glutamine synthetase	yes	Enzyme		0.934111		0.402057		0.162072		0.165472			0.987078	0.881143	0.430443	0.373672	0.167229	0.156914	0.236031	0.0949128
Q2FXZ2_C15	Q2FXZ2	IIGIDLGTTNSUVTVLEGDEPK	dnaK	Chaperone protein DnaK	yes	Modulator/Scaffolding/Adaptor		1.1321		0.283539		0.118285		0.125529			1.27431	0.989895	0.343822	0.223256	0.10243	0.134139	0.239744	0.0113146
Q2G0N1_C473	Q2G0N1	EFNVEUNVGAPMVSYR	fusA	Elongation factor G	yes	Gene expression and Nucleic acid binding		0.934278		0.441552		0.184227		0.0988262			1.00216	0.866394	0.532267	0.350837	0.214	0.154454	0.147046	0.0506062
Q2FY60_C330	Q2FY60	IUSYAQGFAQMR	SAOUHSC_01605	6-phosphogluconate dehydrogenase, decarboxylating	yes	Enzyme		0.893111		0.281038		0.228279		0.248976			1.05235	0.733875	0.394075	0.168	0.146916	0.309642	0.346872	0.151079
Q2G2U1_C226	Q2G2U1	TLEVNFUNEIDAFYQYR	saeS	Histidine protein kinase SaeS	no	Receptor/Transporter/Channel		1.40376						0.24659			1.49149	1.31603					0.246834	0.246347
Q2FZ72_C1033	Q2FZ72	TTVENGIPULTSLDTANALTNVIESMTFTMR	carB	Carbamoyl-phosphate synthase large chain	no	Enzyme		0.959013		0.504619		0.211818		-0.0362481			1.25834	0.659685	0.502534	0.506703	0.247441	0.176195	0.288087	-0.360583
Q2FWC9_C6	Q2FWC9	ELUFEGITLK	SAOUHSC_02370	Uncharacterized protein	no	not assigned		1.03774		0.320393		0.132281		0.137648			1.1392	0.936288	0.345396	0.29539	0.159558	0.105003	0.251845	0.0234509
Q2FXZ6_C47	Q2FXZ6	VDFEANADVFVINTUTVTNTGDKK	SAOUHSC_01679	Uncharacterized protein	no	Enzyme		0.991648		0.46256				0.172994			1.28374	0.699552	0.440208	0.484911			0.316146	0.0298416
Q2FWD4_C118	Q2FWD4	CVIGLPGGUPLGPR	murA	UDP-N-acetylglucosamine 1-carboxyvinyltransferase	no	Enzyme	Functional site	1.01043		0.387142		0.219033		0.00891264			1.13606	0.884793	0.446489	0.327795	0.274053	0.164014	0.00532812	0.0124972
Q2FZL8_C369	Q2FZL8	AQATLFAGUGIVK	SAOUHSC_00982	Uncharacterized protein	no	Enzyme		1.00073		0.545133		0.107406		-0.0319328			1.02254	0.978909	0.522884	0.567383	0.135929	0.078883	0.0825685	-0.146434
Q2FZJ0_C32	Q2FZJ0	VUDILGR	purL	Phosphoribosylformylglycinamidine synthase subunit PurL	no	Enzyme		1.48485						0.127473			1.53408	1.43562					0.138957	0.115988
Q2FVM1_C78	Q2FVM1	NGVITWENQQTDYPSUGPDMPEYEPR	SAOUHSC_02681	Nitrate reductase, alpha subunit	no	Enzyme		1.50354						0.107632			1.66521	1.34187					0.0949116	0.120352
Q2FZP7_C362	Q2FZP7	YATQTIUR	ugtP	Processive diacylglycerol beta-glucosyltransferase	no	Enzyme		1.31129						0.298556			1.36575	1.25683					0.377401	0.219711
P95689_C102	P95689	MTGILUR	serS	Serine--tRNA ligase	yes	Gene expression and Nucleic acid binding		1.17285		0.334628				0.102267			1.25906	1.08665	0.445833	0.223423			0.161049	0.0434845
Q2FXU8_C317	Q2FXU8	IPLSQAVIELULSPK	SAOUHSC_01734	Uncharacterized protein	no	Gene expression and Nucleic acid binding				1.60887									1.52286	1.69488
P0A0M9_C108	P0A0M9	DEGFYVATMNAQUHAIPFYESLNFK	SAOUHSC_00995	Putative acetyltransferase SAOUHSC_00995	no	Enzyme		1.60798									2.06554	1.15043
Q2G178_C100	Q2G178	DLFKEEDLEPWTSUEFDFTR	SAOUHSC_00269	Uncharacterized protein	no	not assigned		1.24405						0.355097			1.17875	1.30935					0.379177	0.331017
Q2FXE1_C70	Q2FXE1	ASEGLYUHHISEDKFQNLSDLR	SAOUHSC_01922	Uncharacterized protein	no	not assigned		1.35067						0.248216			1.47643	1.2249					0.051024	0.445409
Q2G0T1_C24	Q2G0T1	AVEUDTIETNGSAINEQTLEVIR	rnmV	Ribonuclease M5	no	Gene expression and Nucleic acid binding		1.21329						0.383153			1.43563	0.990955					0.554049	0.212258
Q2FXV6_C199	Q2FXV6	DSTGIUFIGEK	mnmA	tRNA-specific 2-thiouridylase MnmA	yes	Enzyme	Functional site	1.43427		0.703353		-0.157261		-0.385664			1.48641	1.38213	0.72261	0.684096	0.00265528	-0.317178	-0.34129	-0.430038
Q2FX94_C209	Q2FX94	YMLDRUETMLSESK	fumC	Fumarate hydratase class II	no	Enzyme		1.20343		0.107735		0.119634		0.16237			1.39457	1.01228	0.137226	0.078245	0.159325	0.079944	0.333863	-0.00912196
Q2FX89_C23	Q2FX89	TUAGTNTHLHLIKPLGFR	SAOUHSC_01988	Putative tRNA (cytidine(34)-2'-O)-methyltransferase	no	Gene expression and Nucleic acid binding		1.03721		0.304155		0.106478		0.143285			1.1447	0.929715	0.381062	0.227248	0.137766	0.0751903	0.181293	0.105276
Q2FV60_C69	Q2FV60	DGFTFDMGPTIVMMPDVYKDVFTAUGK	crtN	Dehydrosqualene desaturase	no	Enzyme		0.976125				0.294525		0.31996			1.11503	0.837217			0.452595	0.136454	0.225892	0.414027
Q2FZU6_C363	Q2FZU6	PYCEALKEEGLLUK	rocD	Ornithine aminotransferase	no	Enzyme		0.985094		0.261007		0.213457		0.130505			1.13297	0.837217	0.181166	0.340847	0.422018	0.00489684	0.259423	0.00158609
Q2G0W0_C56	Q2G0W0	VUSTNEGLLNIK	SAOUHSC_00414	Uncharacterized protein	no	not assigned		1.42236		0.13426		-0.0864398		0.119851			1.54427	1.30045	0.0654434	0.203078	-0.0984624	-0.0744173	0.177795	0.0619073
Q2G1U0_C182	Q2G1U0	IQUIVEAEHLK	gmk	Guanylate kinase	yes	Enzyme		1.02958		0.19114		0.170779		0.197792			1.14934	0.909819	0.261833	0.120447	0.283394	0.0581639	0.212383	0.183201
Q2G007_C47	Q2G007	ENYFUDRDYQDFLTNCQILIQNK	SAOUHSC_00821	Uncharacterized protein	no	not assigned		1.2994						0.289667			1.28434	1.31446					0.383608	0.195726
Q2G248_C259	Q2G248	GLSATIEEFVYAAEYIASQGNQNIILUER	SAOUHSC_01852	Uncharacterized protein	no	Enzyme				0.989169		0.599812							0.890875	1.08746	0.53087	0.668755
Q2FYF5_C38	Q2FYF5	GQUVILDNEDVTDFLR	SAOUHSC_01496	Cytidylate kinase	yes	Enzyme		0.976162		0.300877		0.0301622		0.277682			0.956949	0.995376	0.335598	0.266157	0.196481	-0.136157	0.293811	0.261552
Q2FVV9_C147	Q2FVV9	YDPNQUILCGR	SAOUHSC_02582	Putative formate dehydrogenase SAOUHSC_02582	no	Enzyme	Functional site	0.769697		0.460348		0.171653		0.173538			0.90666	0.632734	0.4755	0.445197	0.174279	0.169027	0.151729	0.195348
Q2FWB9_C58	Q2FWB9	LADSEVLVUTVIGFPLGASTTATK	deoC	Deoxyribose-phosphate aldolase	no	Enzyme		0.557468		0.698771		0.290657		0.0251116			0.602457	0.51248	0.712992	0.684549	0.293841	0.287472	0.0381552	0.012068
Q93T05_C114	Q93T05	TUTDNANGNEIYVENGEILNHKPAK	mutL	DNA mismatch repair protein MutL	no	Gene expression and Nucleic acid binding		0.905212		0.54999				0.116182			0.932288	0.878137	0.763582	0.336398			0.149389	0.082975
Q2FYI6_C107	Q2FYI6	STLHSVPDUQAITK	SAOUHSC_01460	Uncharacterized protein	no	Gene expression and Nucleic acid binding		0.88043		0.274201		0.183333		0.227564			0.986375	0.774486	0.361488	0.186913	0.257477	0.109188	0.30342	0.151708
Q2FXL3_C93	Q2FXL3	WUASAGLDNVITLSDHR	tpx	Thiol peroxidase	no	Enzyme		0.830148		0.492491				0.240517			0.800248	0.860049	0.528071	0.456911			0.272143	0.208892
Q2G0Q1_C128	Q2G0Q1	DQFTVPFVUGCR	pdxS	Pyridoxal 5'-phosphate synthase subunit PdxS	no	Enzyme		0.614692		0.128436		0.48451		0.334194			0.713168	0.516217	0.14104	0.115832	0.42503	0.543991	0.462995	0.205393
P47768_C514	P47768	MUPIETPEGPNIGLINSLSSYAR	rpoB	DNA-directed RNA polymerase subunit beta	yes	Gene expression and Nucleic acid binding		1.26208		0.360152		-0.0396952		-0.0303741			1.36648	1.15769	0.415326	0.304978	0.193709	-0.273099	0.0163537	-0.0771019
Q2G2V3_C99	Q2G2V3	SIDVQLIFUTLPLELR	menE	2-succinylbenzoate--CoA ligase	no	Enzyme				1.01743		0.533609							0.948825	1.08604	0.631803	0.435415
Q2FYY6_C170	Q2FYY6	GEPTLELNDDGGYFDLAPTDLGENURR	SAOUHSC_01287	Glutamine synthetase	yes	Enzyme		0.962656		0.505467				0.0821808			0.974723	0.95059	0.61664	0.394295			0.0574471	0.106915
Q2FW45_C11	Q2FW45	MEIHVYTGPLUGFNEYINSEVK	SAOUHSC_02472	Uncharacterized protein	no	not assigned		1.2273		0.320109							1.00755	1.44705	0.243182	0.397036
Q2FYG4_C48	Q2FYG4	VAULTIDTSMR	SAOUHSC_01488	Uncharacterized protein	no	not assigned		0.948475		0.142126		0.0618649		0.392031			1.04271	0.854235	0.184217	0.100036	0.139862	-0.0161326	0.583808	0.200253
Q2FW19_C24	Q2FW19	EYTRUER	rpsZ	30S ribosomal protein S14 type Z	yes	Modulator/Scaffolding/Adaptor	Functional site	0.791939		0.576764		0.306633		-0.133249			0.816477	0.767401	0.588517	0.565012	0.44668	0.166587	-0.0809422	-0.185556
Q2FYK5_C201	Q2FYK5	HIVSAWNPTEIDTMALPPUHTMFQFYVQDGK	thyA	Thymidylate synthase	yes	Enzyme	Functional site	0.753229		0.346361		0.166714		0.267034			0.782686	0.723773	0.347212	0.34551	0.271306	0.0621217	0.307312	0.226755
Q2FYZ9_C630	Q2FYZ9	QVAIISIMAQMGAYVPUK	mutS	DNA mismatch repair protein MutS	no	Gene expression and Nucleic acid binding		1.03654		0.557464		0.194585		-0.266624			1.0588	1.01428	0.587557	0.527371	0.275603	0.113567	-0.0917712	-0.441478
Q2FYH0_C346	Q2FYH0	QFGDIVVQHVDQLTLQHAUEQLK	aroB	3-dehydroquinate synthase	no	Enzyme				1.07953		0.440358							1.07888	1.08018	0.435202	0.445515
Q2FZP0_C133	Q2FZP0	FPWLSANIEYNVTKEPYFSTPYUIK	SAOUHSC_00960	Uncharacterized protein	no	not assigned		1.14881		0.394083		0.225487		-0.250992			1.30819	0.98943	0.708055	0.0801119	0.253989	0.196985	0.0524159	-0.5544
Q2FYV3_C82	Q2FYV3	IVIUASTGNTSASAAAYAAR	SAOUHSC_01321	Threonine synthase	no	Enzyme	Functional site							1.51339									1.49062	1.53615
Q2FYG5_C110	Q2FYG5	VLKPGGMVVULETSQPTLPVFK	SAOUHSC_01487	Menaquinone biosynthesis methyltransferase, putative	no	not assigned		1.08133						0.428772			1.19409	0.96857					0.474047	0.383497
Q2FY55_C142	Q2FY55	HQIEGHDVMNVINQLQTLFNKYUEER	SAOUHSC_01610	UPF0403 protein SAOUHSC_01610	no	not assigned		0.302852		0.413869		0.503129		0.289372			0.452806	0.152897	0.503043	0.324695	0.637657	0.368601	0.328147	0.250598
Q2FZC8_C377	Q2FZC8	GLFAAGEUDFSQHGGNR	SAOUHSC_01104	Succinate dehydrogenase, flavoprotein chain TC0881, putative	no	Enzyme		0.80583		0.232995		0.287519		0.182872			0.941181	0.670478	0.294782	0.171207	0.310922	0.264116	0.258459	0.107286
Q2FYZ9_C63	Q2FYZ9	KENPIPMUGVPYHSADSYIDTLVNNGYK	mutS	DNA mismatch repair protein MutS	no	Gene expression and Nucleic acid binding		1.60338						-0.100308			1.4741	1.73266					0.245374	-0.445991
Q2FUZ8_C448	Q2FUZ8	GVUSVHFAER	SAOUHSC_02947	Sulfite reductase [NADPH] flavoprotein alpha-component	no	Enzyme	Functional site	1.13332		0.0370706		0.235835		0.0948309			1.23039	1.03626	0.0765018	-0.00236061	0.380951	0.090718	0.266277	-0.076615
Q2G0J8_C110	Q2G0J8	AGEVYEASNAQYFVVDPVMVUK	SAOUHSC_00562	Phosphomethylpyrimidine kinase	no	Enzyme		0.912025		0.331563		0.0975521		0.156997			1.25261	0.571442	0.413377	0.249749	0.0701145	0.12499	0.145351	0.168642
Q2FW32_C265	Q2FW32	SYNULKR	rpoA	DNA-directed RNA polymerase subunit alpha	yes	Modulator/Scaffolding/Adaptor		0.886841		0.302418		0.175343		0.132733			1.00281	0.770871	0.340961	0.263876	0.212134	0.138552	0.188907	0.0765591
Q2FZX4_C41	Q2FZX4	NLNTVUEEAK	lipA	Lipoyl synthase	no	Enzyme	Functional site	0.950249		0.515473		0.0299467		0.00156768			1.01126	0.889233	0.548467	0.482479	0.122411	-0.0625173	0.0323589	-0.0292235
Q2FXT6_C150	Q2FXT6	SMQIQNDLGSDIMMAFDEUPPMPAEYDYVK	tgt	Queuine tRNA-ribosyltransferase	no	Gene expression and Nucleic acid binding	Functional site	0.989922				0.259967		0.245828			1.08204	0.897804			0.266852	0.253082	0.264354	0.227301
Q2FYH6_C342	Q2FYH6	IKPFYMQPNPENEETVLUADLIAPEGYGEIIGGSER	asnS	Asparagine--tRNA ligase	no	Gene expression and Nucleic acid binding		0.938068		0.615536				-0.0580556			1.02878	0.847356	0.685895	0.545178			-0.0550216	-0.0610895
Q2G0Y6_C223	Q2G0Y6	VLUAMSGGVDSSVVAVLLHK	guaA	GMP synthase [glutamine-hydrolyzing]	yes	Enzyme	Functional site	1.05755		0.121863		0.192108		0.118479			0.963464	1.15164	0.19131	0.0524159	0.228726	0.15549	0.233643	0.00331439
Q2FVT5_C14	Q2FVT5	GLSIEUK	hutU	Urocanate hydratase	no	not assigned		0.78377		0.462013		0.231491		0.00937894			0.834317	0.733222	0.462907	0.461119	0.289598	0.173383	0.0596666	-0.0409087
Q2FVM1_C51	Q2FVM1	TTHGVNUTGSCSWK	SAOUHSC_02681	Nitrate reductase, alpha subunit	no	Enzyme		1.0851		0.493132				-0.10037			1.09734	1.07286	0.742351	0.243913			-0.0723311	-0.128409
Q2FV45_C125	Q2FV45	DLDGHHFNFLVU	SAOUHSC_02894	Uncharacterized protein	no	not assigned		1.47765									2.04994	0.905351
Q2G1N7_C61	Q2G1N7	IVSDLUYK	sarS	HTH-type transcriptional regulator SarS	no	Gene expression and Nucleic acid binding	Functional site	0.95217				0.258336		0.266335			1.00935	0.894992			0.765535	-0.248862	0.264236	0.268434
Q2FUX1_C239	Q2FUX1	LISQSUIK	SAOUHSC_02974	Uncharacterized protein	no	Receptor/Transporter/Channel		1.36408						0.110327			1.41684	1.31133					-0.0227714	0.243425
Q2G0N1_C258	Q2G0N1	QATTNVEFYPVLUGTAFK	fusA	Elongation factor G	yes	Gene expression and Nucleic acid binding		1.00097		0.145925		0.184572		0.142441			1.13192	0.870029	0.201132	0.090718	0.209516	0.159629	0.223175	0.0617071
P60393_C27	P60393	ENGVYIDUTLGGAGHALYLLNQLNDDGR	rsmH	Ribosomal RNA small subunit methyltransferase H	no	Gene expression and Nucleic acid binding		1.21225						0.256918			1.15685	1.26766					0.36042	0.153416
Q93T05_C283	Q93T05	FPIUYINIEMDPILVDVNVHPTK	mutL	DNA mismatch repair protein MutL	no	Gene expression and Nucleic acid binding				1.46563									1.86307	1.06819
Q2G1P3_C39	Q2G1P3	SAYLIGSGLASLAAAUFLIR	SAOUHSC_00061	Uncharacterized protein	no	Enzyme		0.870886		0.138066		0.122016		0.33442			1.214	0.527771	0.147046	0.129085	0.18053	0.0635029	0.35061	0.31823
Q2G204_C79	Q2G204	MMUQFVEDIDVVVNILR	SAOUHSC_00942	GTP pyrophosphokinase, putative	no	Enzyme		1.19784						0.267232			0.883855	1.51182					0.428786	0.105678
Q2FXW4_C166	Q2FXW4	ENSNVEIEVQVQGMTUMFQSK	SAOUHSC_01717	Uncharacterized protein	no	Enzyme								1.46475									1.47711	1.45238
Q2G273_C69	Q2G273	IIGVETGGUPHTAIR	ureG	Urease accessory protein UreG	no	not assigned		0.921331		0.160367		0.131841		0.24781			1.15493	0.687735	0.254473	0.0662614	0.227495	0.0361868	0.361622	0.133997
Q2FWD1_C382	Q2FWD1	ENNVPFFGIULGMQLATVEFSR	pyrG	CTP synthase	yes	Enzyme	Functional site	0.866751		0.330413		0.1217		0.140054			1.20583	0.527671	0.357833	0.302992	0.170951	0.0724489	0.125783	0.154324
Q2FZW0_C104	Q2FZW0	IDYDELIIGLGUEDKYHNVPGAEEYTHSIQTLSK	SAOUHSC_00875	Uncharacterized protein	no	Enzyme		0.827371		0.538786		0.226316		-0.13476			0.908429	0.746313	0.500904	0.576667	0.064607	0.388024	-0.348813	0.0792928
Q2FWE2_C209	Q2FWE2	IDGIVQAEQSEEGLESTVLDUTSFPYK	SAOUHSC_02357	Threonylcarbamoyl-AMP synthase	yes	Enzyme	Functional site	1.00564		0.582238				-0.143115			1.12009	0.891186	0.654527	0.509949			-0.0772693	-0.208961
Q2G2D1_C11	Q2G2D1	KUILSNEMHPK	SAOUHSC_01244	Uncharacterized protein	yes	not assigned		0.829631		0.0922138		0.308473		0.208826			0.776188	0.883073	0.172359	0.012068	0.221444	0.395502	0.527571	-0.109919
Q2FZM1_C69	Q2FZM1	VAGUIISYSGENELK	SAOUHSC_00979	Uncharacterized protein	no	not assigned		0.752152		0.133353		0.308671		0.244815			0.81567	0.688635	0.118227	0.148479	0.189413	0.427928	0.351066	0.138565
Q2FWX1_C63	Q2FWX1	VLVITEDWUGDAMMNLPILK	SAOUHSC_02150	Uncharacterized protein	no	not assigned		0.602541		0.273768		0.503597		0.0524407			0.672018	0.533065	0.29125	0.256286	0.499476	0.507719	-0.0160013	0.120883
Q2G295_C242	Q2G295	GNLPDAILUISDEEAIGIMHSAMDAGIK	SAOUHSC_01850	Catabolite control protein A	no	Gene expression and Nucleic acid binding		0.826269		0.300846		0.106352		0.196683			1.08693	0.565607	0.290397	0.311294	0.169359	0.0433442	0.261119	0.132247
Q2FVV9_C150	Q2FVV9	YDPNQCILUGR	SAOUHSC_02582	Putative formate dehydrogenase SAOUHSC_02582	no	Enzyme	Functional site	0.688171		0.539942		-0.00883703		0.207997			0.708496	0.667847	0.133827	0.946057	-0.0452528	0.0275787	0.215741	0.200253
Q2FWB5_C12	Q2FWB5	TAETNYFWLNUGYNR	SAOUHSC_02383	Uncharacterized protein	no	not assigned		0.83588		0.304598		0.0462997		0.233969			0.960882	0.710878	0.288654	0.320542	0.162339	-0.0697395	0.275365	0.192573
Q2FYZ9_C541	Q2FYZ9	IISELDULQSFAEIAQK	mutS	DNA mismatch repair protein MutS	no	Gene expression and Nucleic acid binding		1.40742						0.00688389			1.62681	1.18802					0.067501	-0.0537333
Q2FZK7_C230	Q2FZK7	YKPQVNSSINDYIUK	atl	Bifunctional autolysin	no	Enzyme		1.08001		0.461176		-0.0858267		-0.0422341			1.19906	0.960956	0.738898	0.183455	-0.147122	-0.0245312	-0.0429621	-0.0415062
Q2G0I3_C91	Q2G0I3	LFTGDEGSHUQIAR	SAOUHSC_00582	Uncharacterized protein	no	Gene expression and Nucleic acid binding		0.90743		0.543955		-0.0298432		-0.00894201			0.986229	0.828632	0.417704	0.670206	0.100709	-0.160395	-0.029809	0.0119249
Q2FVV6_C175	Q2FVV6	AENVIFIGLLUK	SAOUHSC_02585	Uncharacterized protein	no	Gene expression and Nucleic acid binding		0.828002		0.387356		0.08726		0.104364			0.907198	0.748805	0.445032	0.32968	0.0542177	0.120302	0.155509	0.0532179
Q2FXI6_C61	Q2FXI6	FMDIUIENGIMGIPSFLVYK	SAOUHSC_01860	Uncharacterized protein	no	Enzyme		0.502178		0.354387		0.138639		0.411076			0.502942	0.501414	0.497638	0.211137	0.212258	0.0650208	0.548338	0.273814
Q2FXA4_C259	Q2FXA4	NFIYTPVGFVUEHLEVLYDNDYECK	hemH	Ferrochelatase	no	Enzyme	Functional site	0.561602		0.599247		0.182227		0.059401			0.613154	0.51005	0.617769	0.580724	0.255561	0.108892	0.102591	0.016211
Q2G218_C72	Q2G218	AGEYSDUHDADLVVICAGAAQKPGETR	ldh1	L-lactate dehydrogenase 1	no	Enzyme	Functional site	0.870431		0.256347		0.142414		0.130775			0.974829	0.766033	0.336626	0.176067	0.232203	0.0526245	0.181166	0.0803848
Q2FUZ8_C187	Q2FUZ8	YSVLALGDQTYEFFUQAGK	SAOUHSC_02947	Sulfite reductase [NADPH] flavoprotein alpha-component	no	Enzyme	Functional site			1.28236				0.110594					1.15069	1.41403			0.225768	-0.00458061
Q2FYR1_C102	Q2FYR1	YLQQHQULYVK	femB	Aminoacyltransferase FemB	yes	Enzyme		0.807385		0.166926		0.178142		0.238766			0.928981	0.685789	0.192182	0.141671	0.247928	0.108357	0.31429	0.163241
Q2FVM2_C221	Q2FVM2	IEAGMPTVUSETCTGR	SAOUHSC_02680	Nitrate reductase, beta subunit	no	Enzyme		0.891076						0.498132			0.986884	0.795268					0.679424	0.316841
Q2FVV6_C107	Q2FVV6	QULSLPQTR	SAOUHSC_02585	Uncharacterized protein	no	Gene expression and Nucleic acid binding		0.744241		0.387166		0.112359		0.143757			0.815739	0.672742	0.47415	0.300182	0.11703	0.107688	0.235237	0.0522768
P0A088_C59	P0A088	FHSEUGWPSFSK	msrB	Peptide methionine sulfoxide reductase MsrB	no	Enzyme		0.910765		0.305011		0.17758		-0.00591801			0.988803	0.832727	0.513895	0.0961269	0.256441	0.098719	0.0698841	-0.0817201
Q2G2U6_C65	Q2G2U6	DGMEVUR	walR	Transcriptional regulatory protein WalR	yes	Gene expression and Nucleic acid binding		0.969853		0.539232		-0.0231359		-0.0985653			1.08188	0.857822	0.551393	0.52707	0.0388576	-0.0851294	-0.111695	-0.0854355
Q2FVV7_C14	Q2FVV7	LIUSWLK	SAOUHSC_02584	Uncharacterized protein	no	Enzyme						0.864631		0.522391							0.738379	0.990882	0.396769	0.648014
Q2G2V4_C30	Q2G2V4	FYPTUSEYTR	SAOUHSC_01914	Putative membrane protein insertion efficiency factor	no	not assigned		1.19266						0.192384			1.18884	1.19648					0.273337	0.111432
Q2FZ82_C124	Q2FZ82	EKUKEFALEQIELQK	ileS	Isoleucine--tRNA ligase	yes	Gene expression and Nucleic acid binding		0.705506		-0.0633123		0.549558		0.191709			0.663401	0.747612	-0.0615973	-0.0650273	0.278223	0.820894	0.0391612	0.344256
Q2G0Y7_C326	Q2G0Y7	VVAGVGVPQITAIYDUATEAR	guaB	Inosine-5'-monophosphate dehydrogenase	no	Enzyme		0.876576		0.310056		0.115693		0.0793424			0.885731	0.867422	0.292311	0.327802	-0.0158117	0.247198	0.0951818	0.0635029
Q2G274_C429	Q2G274	SPEEUEIFLVEGDSAGGSTK	gyrB	DNA gyrase subunit B	yes	Gene expression and Nucleic acid binding		1.12539		0.452902		-0.129972		-0.0690838			1.25743	0.993348	0.544485	0.361319	-0.0834164	-0.176528	-0.100902	-0.0372659
Q2FZJ4_C90	Q2FZJ4	LLUEKYNIPQGYQAIQLLQDR	purK	N5-carboxyaminoimidazole ribonucleotide synthase	no	Enzyme		1.19452						0.175145			1.22651	1.16253					0.338795	0.0114956
Q2FY46_C123	Q2FY46	LTEEGUFDK	xseA	Exodeoxyribonuclease 7 large subunit	no	Gene expression and Nucleic acid binding		1.0915						0.274364			1.22361	0.959399					0.414244	0.134484
Q2FZH4_C12	Q2FZH4	SEIIVYTQNDUPPCTFVK	SAOUHSC_01030	Uncharacterized protein	no	Enzyme		1.05706						0.304684			1.11477	0.999351					0.339137	0.27023
Q2FWG7_C213	Q2FWG7	QFFTEWNUHD	SAOUHSC_02324	Uncharacterized protein	no	not assigned				1.01993		0.341742							1.03274	1.00712	0.398022	0.285461
Q2FZ70_C35	Q2FZ70	SPIYUDNR	pyrE	Orotate phosphoribosyltransferase	no	Enzyme		0.869997		0.245024		0.0108564		0.233181			1.01543	0.724563	0.281906	0.208143	0.10675	-0.0850375	0.448726	0.0176346
Q2FWA0_C541	Q2FWA0	GAHPUIISMEGLEK	glmS	Glutamine--fructose-6-phosphate aminotransferase [isomerizing]	yes	Enzyme		1.11115		0.256452		-0.121039		0.111693			1.1671	1.0552	0.280244	0.232661	-0.0776956	-0.164383	0.175429	0.0479571
Q2FVM6_C58	Q2FVM6	IIAMNDAAKDILSEEDNYSAVANAIUHR	nreB	Oxygen sensor histidine kinase NreB	no	Modulator/Scaffolding/Adaptor	Functional site			1.35747									1.46817	1.24677
Q2G1Y6_C400	Q2G1Y6	EIDGVMUEPFER	SAOUHSC_01058	GTP-binding protein TypA, putative	no	not assigned		1.18827						0.165116			1.30807	1.06846					0.195222	0.135009
Q2G037_C87	Q2G037	NNIYIUR	whiA	Putative sporulation transcription regulator WhiA	no	Gene expression and Nucleic acid binding		1.34789									1.2976	1.39819
Q2G2D3_C52	Q2G2D3	EGGVDLNDUTLASEK	rimP	Ribosome maturation factor RimP	no	not assigned		0.904781		0.0738682		0.124831		0.241548			1.05262	0.756938	0.0578315	0.0899049	-0.00517412	0.254836	0.406537	0.0765591
Q2FXL6_C137	Q2FXL6	HAPUDVLVVR	SAOUHSC_01819	Putative universal stress protein SAOUHSC_01819	no	not assigned		0.908856		0.264179		0.114802		0.0490522			0.944637	0.873075	0.293772	0.234586	0.171079	0.0585243	0.0458709	0.0522336
Q2FZV4_C50	Q2FZV4	QPFGYLHGGASIALGETAUSLGSANLIDTTK	SAOUHSC_00881	Uncharacterized protein	yes	not assigned		0.829611		0.507084		-0.0481514		0.0482116			0.931114	0.728107	0.510684	0.503485	0.0616821	-0.157985	0.100955	-0.00453175
Q2G0M5_C287	Q2G0M5	QGIANSWPDSIDTSUSR	SAOUHSC_00535	Uncharacterized epimerase/dehydratase SAOUHSC_00535	no	Enzyme		0.908412		0.465258		-0.0418013		0.0048307			1.05399	0.762837	0.451479	0.479036	0.0171359	-0.100738	0.0588307	-0.0491693
Q2G2F3_C69	Q2G2F3	EIGEFSEHHFYUAIFIPSTEDHAYQLEK	traP	Signal transduction protein TRAP	no	not assigned		0.826567						0.508602			0.701771	0.951364					0.451119	0.566084
Q2G2C9_C56	Q2G2C9	LITDKUK	SAOUHSC_01245	Uncharacterized protein	yes	not assigned		0.911578		0.288332		0.0719463		0.0621068			0.929715	0.89344	0.417164	0.1595	-0.0450146	0.188907	0.113434	0.0107798
Q2FZ74_C207	Q2FZ74	ELGIPGIPNIUESVQIAR	pyrC	Dihydroorotase	no	Enzyme		1.07231		0.144561		0.00784883		0.106478			1.14522	0.999401	0.190115	0.0990079	0.0478213	-0.0321237	0.282166	-0.0692091
Q2G2D2_C251	Q2G2D2	ISVFSENNDIDAVGAUVGAK	nusA	Transcription termination/antitermination protein NusA	yes	Gene expression and Nucleic acid binding		1.00387		0.236069		0.11204		-0.0217008			1.01984	0.987903	0.260628	0.211511	0.148479	0.0756011	0.0752769	-0.118678
Q2FXM6_C152	Q2FXM6	IIDYUTENRLPFILFSASGGAR	accD	Acetyl-coenzyme A carboxylase carboxyl transferase subunit beta	yes	Enzyme		0.686312		0.117524		0.200868		0.323583			0.728399	0.644225	0.128029	0.107018	0.173255	0.22848	0.384492	0.262674
Q2G2R8_C238	Q2G2R8	ETQGNNGWUAGYTMSELLNATYNTNK	sspP	Staphopain A	no	Enzyme	Functional site	1.3268									1.69724	0.956354
Q2FXM5_C44	Q2FXM5	VTNKEELSLAYSPGVAEPUKDIYEDK	SAOUHSC_01810	NADP-dependent malic enzyme, putative	no	Enzyme		0.883773		0.185089		0.173615		0.0826679			1.00159	0.765959	0.213005	0.157173	0.226878	0.120352	0.154842	0.0104934
Q2FYP2_C29	Q2FYP2	FTEGNUYGLIGANGAGK	SAOUHSC_01392	ABC transporter, ATP-binding protein, putative	no	not assigned	Functional site	1.32439									1.31783	1.33096
Q2FXZ6_C74	Q2FXZ6	QNPDAVIUVTGCYAQTSSAEIMEIPGVDVVVGTQDR	SAOUHSC_01679	Uncharacterized protein	no	Enzyme		1.13446						0.189158			1.21089	1.05804					0.186754	0.191563
Q2FVM2_C179	Q2FVM2	RDEDGIVLVDQDAUR	SAOUHSC_02680	Nitrate reductase, beta subunit	no	Enzyme		1.04476						0.272424			1.18333	0.906198					0.265317	0.279531
Q2FWM4_C198	Q2FWM4	EHUYASVR	SAOUHSC_02265	Accessory gene regulator protein A	no	Gene expression and Nucleic acid binding		1.51339		0.515041		-0.404421		-0.307278			1.5252	1.50158	0.549817	0.480265	-0.345729	-0.463112	-0.289731	-0.324826
Q2FY53_C281	Q2FY53	VLLVTEDNLEGSIMSEVSAIIAEHULFDLDAPIMR	SAOUHSC_01612	2-oxoisovalerate dehydrogenase, E1 component, beta subunit, putative	no	Enzyme				1.3147									1.57289	1.05651
Q2FVM0_C76	Q2FVM0	INDUIVEAAR	SAOUHSC_02682	Uroporphyrin-III C-methyltransferase, putative	no	Enzyme				1.31175									1.4691	1.15439
Q2G065_C307	Q2G065	IAELUHK	SAOUHSC_00756	Uncharacterized protein	no	Enzyme		0.852617		0.247908				0.210009			0.906298	0.798935	0.288074	0.207743			0.287601	0.132417
Q2FZ72_C34	Q2FZ72	TILVIGSGPIIIGQAAEFDYAGTQAULALKEEGYR	carB	Carbamoyl-phosphate synthase large chain	no	Enzyme				1.30811									1.42637	1.18986
Q2G0N1_C390	Q2G0N1	DTGTGDTLUGEK	fusA	Elongation factor G	yes	Gene expression and Nucleic acid binding		0.987269		0.0831705		0.0743387		0.16244			1.14999	0.824548	0.123141	0.0432	0.17229	-0.0236124	0.210514	0.114367
Q2G0K2_C86	Q2G0K2	QUGSGLESVQYACR	SAOUHSC_00558	Acetyl-CoA acetyltransferase, putative	no	Enzyme		1.30119									1.3122	1.29019
Q2G235_C217	Q2G235	NUVFLVDTFHTLK	SAOUHSC_02133	Nicotinate phosphoribosyltransferase	yes	Enzyme		0.793975		0.142644		0.0166352		0.345043			0.954398	0.633552	0.275103	0.0101846	0.0945025	-0.0612322	0.426211	0.263876
Q2G0M6_C198	Q2G0M6	SNUGLGFK	araB	Ribulokinase	no	Enzyme		0.59289		0.580241		0.170511		-0.0454154			0.796764	0.389016	0.755144	0.405339	0.0890913	0.251931	0.129481	-0.220312
Q2FXY5_C299	Q2FXY5	HYQLDELLNIIDAUAETDYK	SAOUHSC_01690	Uncharacterized protein	yes	Gene expression and Nucleic acid binding		1.29422									1.32587	1.26256
Q2G0T9_C320	Q2G0T9	GIYDGGGWNAIFWUNHDQPR	SAOUHSC_00438	Alpha amylase family protein, putative	no	Enzyme		0.751642		0.209414		0.218893		0.113886			0.865998	0.637286	0.246469	0.172359	0.263635	0.174151	0.215989	0.0117819
Q2FZ69_C16	Q2FZ69	HUNEFINHSNDSNLSSSHDVDESSTK	SAOUHSC_01173	Uncharacterized protein	no	not assigned		0.812709		0.417036		0.0556941		0.00816537			1.18006	0.445356	0.444313	0.389759	0.0858538	0.0255343	0.0318447	-0.0155139
Q2FVV9_C271	Q2FVV9	TVCTYCGVGUSFEVWTK	SAOUHSC_02582	Putative formate dehydrogenase SAOUHSC_02582	no	Enzyme	Functional site	1.04496						0.237507			1.09072	0.999206					0.250355	0.224658
Q2G2T1_C174	Q2G2T1	SIUDIYPLLNK	SAOUHSC_01973	Uncharacterized protein	no	Gene expression and Nucleic acid binding		0.892135						0.383548			0.683023	1.10125					0.6107	0.156397
Q2FZ58_C193	Q2FZ58	GLLUVYEGFLK	SAOUHSC_01193	Uncharacterized protein SAOUHSC_01193	no	Enzyme		1.18546		0.428737		0.00195449		-0.345538			1.28108	1.08984	0.537048	0.320427	-0.415846	0.419755	-0.289175	-0.401902
P47768_C593	P47768	FMDDEVVUR	rpoB	DNA-directed RNA polymerase subunit beta	yes	Gene expression and Nucleic acid binding		1.08706		0.346731		-0.0888576		-0.0763942			1.17817	0.995955	0.337768	0.355693	-0.177441	-0.000274138	0.0398403	-0.192629
Q2G2W4_C31	Q2G2W4	MIUAYCNINR	SAOUHSC_02631	Uncharacterized protein	no	Gene expression and Nucleic acid binding	Functional site	1.24312						0.0246922			1.58135	0.904889					-0.078777	0.128161
Q2G182_C31	Q2G182	DIEAUQK	esxB	ESAT-6 secretion system extracellular protein B	no	not assigned		1.18242						0.0778186			1.31139	1.05346					0.184725	-0.0290875
Q2FW70_C138	Q2FW70	VHHPNEILEUILIEAPDLK	SAOUHSC_02436	Uncharacterized protein	no	not assigned		1.36498				-0.108426					1.64025	1.0897			-0.170199	-0.0466528
Q2G0L0_C39	Q2G0L0	GIPVTYAULTLGQMGR	SAOUHSC_00550	Uncharacterized protein	no	not assigned		0.899249		0.214206		0.0542186		0.0885056			0.938926	0.859572	0.291957	0.136454	0.0790196	0.0294175	0.118626	0.0583858
P0A0B7_C39	P0A0B7	GSWSVVUFYPADFSFVCPTELEDLQNQYEELQK	ahpC	Alkyl hydroperoxide reductase C	no	Enzyme				0.634024		0.614757							0.654894	0.613154	0.717035	0.51248
Q2G295_C216	Q2G295	NGLQLGDTLNUSGAESYK	SAOUHSC_01850	Catabolite control protein A	no	Gene expression and Nucleic acid binding		0.939187		0.168811		0.049484		0.0905297			1.01629	0.862084	0.203674	0.133948	0.0576153	0.0413526	0.158592	0.0224672
Q2G0K8_C18	Q2G0K8	QASFYVAUELYK	nagB	Glucosamine-6-phosphate deaminase	no	Enzyme		0.724889		0.330013		0.15191		0.0398529			0.763024	0.686754	0.218967	0.441058	0.420294	-0.116473	0.191208	-0.111502
Q2FXM5_C362	Q2FXM5	AAVEAIADLIDSSELNEDYUIPGPFDK	SAOUHSC_01810	NADP-dependent malic enzyme, putative	no	Enzyme		0.957266		0.0780342		0.0393922		0.169543			1.06622	0.848316	0.078128	0.0779405	0.0436986	0.0350857	0.253186	0.0858992
Q2FZF1_C47	Q2FZF1	NUGSYNGEEVAAK	rpmF	50S ribosomal protein L32	yes	Modulator/Scaffolding/Adaptor		0.654843		0.465031		0.173569		-0.0494285			0.736215	0.573471	0.503959	0.426104	0.209765	0.137372	-0.000274138	-0.0985828
Q2FY43_C228	Q2FY43	HIEIQIVGDSYGNVIHLGERDUTIQR	SAOUHSC_01623	Acetyl-CoA carboxylase, biotin carboxylase	yes	Enzyme		0.737681		0.383296				0.117611			0.881195	0.594166	0.24987	0.516721			0.0174944	0.217727
Q2FXN4_C117	Q2FXN4	QELDLFTULR	SAOUHSC_01801	Isocitrate dehydrogenase [NADP]	no	Enzyme		0.718435		0.311667		0.0740609		0.124166			0.809985	0.626885	0.429307	0.194026	0.103395	0.0447269	0.1289	0.119431
Q2FZ04_C199	Q2FZ04	LIEDAINHDGFSFVNVFSPUVTYNK	SAOUHSC_01267	Uncharacterized protein	no	Enzyme		0.795978		0.470185				-0.0435665			0.88143	0.710525	0.495491	0.444879			0.0549179	-0.142051
Q2FV76_C111	Q2FV76	EAUYAATPAIQLAK	SAOUHSC_02860	HMG-CoA synthase, putative	yes	Enzyme		1.021		0.0951639		0.0667048		0.0381541			1.10534	0.936666	0.144046	0.0462815	0.0843364	0.0490731	0.0858325	-0.0095243
Q2FVN7_C115	Q2FVN7	EDPELUVLR	SAOUHSC_02665	Uncharacterized protein	no	not assigned		1.00833		0.119392		-0.0779429		0.167464			1.0452	0.97147	0.042956	0.195828	-0.112096	-0.0437896	0.199455	0.135474
Q2G1B9_C229	Q2G1B9	IPEGLTFDHAFEUVGGR	tarJ	Ribulose-5-phosphate reductase 1	yes	Enzyme		0.851189		0.33791		-0.0569143		0.0830164			0.990882	0.711495	0.508275	0.167546	-0.0439894	-0.0698392	0.115566	0.0504669
Q2FYH6_C396	Q2FYH6	YGSVPHUGFGLGLER	asnS	Asparagine--tRNA ligase	no	Gene expression and Nucleic acid binding		0.879902		0.70993		-0.0496957		-0.325505			0.928496	0.831309	0.697944	0.721917	0.0141383	-0.11353	-0.326956	-0.324053
Q2FWH3_C7	Q2FWH3	ENIUIVFGGK	ddl	D-alanine--D-alanine ligase	yes	Enzyme		0.789913		0.20473		0.0610979		0.153176			0.834902	0.744925	0.301236	0.108223	0.0216219	0.100574	0.154238	0.152113
Q2G0A0_C122	Q2G0A0	SUENYSHISVSGGLR	SAOUHSC_00705	Cys-tRNA(Pro)/Cys-tRNA(Cys) deacylase	no	Gene expression and Nucleic acid binding		0.943634						0.263878			1.01314	0.874128					0.311271	0.216486
Q2G147_C90	Q2G147	GAVNMUCILEQDTSIYGDFQR	SAOUHSC_00308	Lipoate--protein ligase	no	not assigned		1.08212						0.123671			1.19125	0.972987					0.247198	0.000144262
Q2FX95_C210	Q2FX95	EAVUQLEIK	SAOUHSC_01982	Ribosomal large subunit pseudouridine synthase, RluD subfamily, putative	no	Gene expression and Nucleic acid binding		0.758453		0.244866				0.20022			0.864822	0.652083	0.235192	0.254539			0.348836	0.0516043
Q2G2W8_C82	Q2G2W8	DNLAILYGEGFHIUK	SAOUHSC_00456	Initiation-control protein YabA	no	not assigned		0.494624		0.722358				-0.014023			0.598676	0.390572	0.504061	0.940655			0.0579786	-0.0860246
Q2FZ75_C94	Q2FZ75	TLESIGUDLLVIR	pyrB	Aspartate carbamoyltransferase	no	Enzyme		0.859066		0.281161		0.0219684		0.0324988			1.09221	0.625925	0.223299	0.339023	-0.0529997	0.0969365	0.138421	-0.0734236
Q2FZ05_C106	Q2FZ05	AKPVKPEGUHAQLIELPFTATAK	SAOUHSC_01266	Uncharacterized protein	no	Enzyme		1.25137						-0.0605022			1.35941	1.14333					0.0976108	-0.218615
Q2FY60_C168	Q2FY60	DGASUVTYIGPNGAGHYVK	SAOUHSC_01605	6-phosphogluconate dehydrogenase, decarboxylating	yes	Enzyme		0.780077		0.166588		-0.0119684		0.252332			0.923796	0.636358	0.21451	0.118666	0.153823	-0.17776	0.197236	0.307429
Q2FZT0_C28	Q2FZT0	VNVDDEGVUTVDMTLTSMGCPMGPQIIDQVK	SAOUHSC_00910	Uncharacterized protein	no	not assigned		0.713044						0.473173			0.839395	0.586693					0.694657	0.251689
Q2FW56_C67	Q2FW56	NAGVSIESLIEFUR	SAOUHSC_02461	Transcriptional regulator, merR family, putative	no	Gene expression and Nucleic acid binding		0.88159		0.203159		-0.0053974		0.104204			0.863463	0.899717	-0.0237537	0.430071	0.384602	-0.395397	0.0846086	0.123799
Q2G001_C77	Q2G001	FAFPNELDKQQUHYDAVTK	SAOUHSC_00833	Uncharacterized protein	no	Enzyme		0.598751		0.266756		0.205241		0.110576			0.659559	0.537942	0.267356	0.266157	0.262914	0.147567	0.144046	0.0771062
Q2FZ02_C453	Q2FZ02	YEGQTVTVLUEGSSK	miaB	tRNA-2-methylthio-N(6)-dimethylallyladenosine synthase	no	not assigned		0.50515		0.370487		0.231556		0.0714873			0.56988	0.440421	0.550802	0.190172	0.159887	0.303225	0.0399806	0.102994
Q2FXT6_C259	Q2FXT6	YLMGVGSPDALIEUSIR	tgt	Queuine tRNA-ribosyltransferase	no	Gene expression and Nucleic acid binding		0.894952		0.260958		0.0677827		-0.0500109			1.11003	0.679874	0.320658	0.201257	0.189793	-0.0542275	-0.039429	-0.0605929
Q2FVL8_C517	Q2FVL8	NKGGUPK	SAOUHSC_02684	Assimilatory nitrite reductase [NAD(P)H], large subunit, putative	no	Enzyme		0.682812		0.442046		0.0394415		0.00724664			0.770026	0.595599	0.46801	0.416083	0.078883	0	0.0568609	-0.0423677
Q2FVA2_C105	Q2FVA2	QSIDQLVIUGLK	SAOUHSC_02831	Uncharacterized protein	no	not assigned		0.928053				0.166627		0.0736865			1.03203	0.824075			0.195096	0.138159	0.110764	0.0366088
Q2G2L0_C124	Q2G2L0	LDSLLNFPETUPHGGVIPR	SAOUHSC_00638	Uncharacterized protein	no	Modulator/Scaffolding/Adaptor		1.18816						-0.0261516			0.920827	1.45549					-0.065944	0.0136409
Q2FZC7_C100	Q2FZC7	QSUSAIVDQLEQPIR	SAOUHSC_01105	Iron-sulphur subunit of succinate dehydrogenase, putative	no	not assigned		0.868548		0.0422619		0.128203		0.121525			0.93461	0.802485	0.313351	-0.228827	0.136585	0.119821	0.171091	0.07196
Q2G294_C48	Q2G294	MNMAYEUIDR	SAOUHSC_01846	Acetyl-CoA synthetase, putative	no	Enzyme		0.671419		0.327951		0.0436088		0.113034			0.75901	0.583827	0.288101	0.367801	0.0496321	0.0375856	0.159569	0.0664988
Q2G1L5_C345	Q2G1L5	SDADVAUTALFDSASGFK	SAOUHSC_00107	Uncharacterized protein	no	Enzyme		0.910251						0.243958			1.12941	0.691087					0.284277	0.20364
Q2FWD1_C439	Q2FWD1	LGLYSUSIK	pyrG	CTP synthase	yes	Enzyme		0.531303		0.0849626		0.0945213		0.443028			0.619742	0.442864	0.159571	0.0103538	0.164014	0.0250288	0.532167	0.353888
Q2FZY4_C41	Q2FZY4	GVLDNGSMTVDMNNPTUGDR	SAOUHSC_00850	Uncharacterized protein	yes	Enzyme		0.807683				0.0255656		0.320034			0.914102	0.701263			0.0426443	0.00848689	0.269049	0.371019
Q2FXP2_C153	Q2FXP2	GVNDNQLDIEAFDIFSNASUTTNCIGPVAK	SAOUHSC_01794	Glyceraldehyde-3-phosphate dehydrogenase	no	Enzyme	Functional site	0.61848		0.198151		0.260577		0.0756095			0.675364	0.561595	0.0900404	0.306262	0.339479	0.181675	0.170053	-0.0188342
Q2FYN4_C349	Q2FYN4	LUESGDIIIK	lysA	Diaminopimelate decarboxylase	no	Enzyme	Functional site	0.927529		0.192922		-0.00675243		0.0361653			0.998034	0.857025	0.321505	0.0643386	0.0483488	-0.0618536	0.108208	-0.0358775
Q2FY34_C330	Q2FY34	ATSNIUSNQALNALASSIAMSALGK	gcvPA	Probable glycine dehydrogenase (decarboxylating) subunit 1	no	Enzyme		0.837134		0.217849		0.0569018		0.0373375			0.912727	0.761541	0.215368	0.22033	0.160435	-0.046631	0.100439	-0.0257644
Q2FZ92_C221	Q2FZ92	NQTEEDYLIUNYHQR	murD	UDP-N-acetylmuramoylalanine--D-glutamate ligase	yes	Enzyme		0.947434						0.201765			1.07128	0.823586					0.266157	0.137372
Q2G2Q3_C165	Q2G2Q3	ENEUHFK	truB	tRNA pseudouridine synthase B	no	Gene expression and Nucleic acid binding		0.848781		-0.012926		0.181293		0.131215			0.981122	0.71644	0.0450235	-0.0708756	0.182184	0.180403	0.140024	0.122406
O52582_C16	O52582	IVVVGAVAGGATUASQIR	cdr	Coenzyme A disulfide reductase	no	Enzyme	Functional site	0.855306		0.141826		0.0196392		0.131373			0.859413	0.851199	0.324119	-0.0404672	0.00619029	0.0330882	0.124063	0.138683
Q2G2W9_C166	Q2G2W9	SLUCSTFLGDFEPVSIK	SAOUHSC_00455	Uncharacterized protein	no	not assigned		0.786838				0.0474108		0.309438			0.865444	0.708231			0.38659	-0.291769	0.422018	0.196859
Q2FYN4_C199	Q2FYN4	GVHUHIGSQIEGTEAFIETAK	lysA	Diaminopimelate decarboxylase	no	Enzyme		1.19058		-0.062403							1.2299	1.15127	-0.461204	0.336398
Q2FYI6_C197	Q2FYI6	GDTPLIDPFUGSGTIAIEACLIAQNIAPGFNR	SAOUHSC_01460	Uncharacterized protein	no	Gene expression and Nucleic acid binding		0.590901		0.0564663		0.0718973		0.405708			0.6918	0.490003	0.0673871	0.0455456	0.170749	-0.0269547	0.433784	0.377633
Q2G039_C30	Q2G039	SLVIQULEDMGYFCVDNLPPVLLPK	SAOUHSC_00787	Nucleotide-binding protein SAOUHSC_00787	no	not assigned	Functional site	1.15113				-0.0295284					1.08093	1.22132			0.0941009	-0.153158
Q2FYF3_C14	Q2FYF3	VESIIIGGGPUGLSAAIEQK	SAOUHSC_01499	Uncharacterized protein	no	Enzyme		0.84025		0.130508		0.0716817		0.0763519			0.901031	0.77947	0.151557	0.109459	0.0657102	0.0776532	0.155071	-0.00236767
Q2FZL5_C129	Q2FZL5	GYAVGGGNVLNVVUDLTIAADNAIFGQTGPK	menB	1,4-dihydroxy-2-naphthoyl-CoA synthase	no	Enzyme		0.350176		0.46732		0.0891813		0.210099			0.438399	0.261952	0.497944	0.436695	0.134878	0.0434845	0.263155	0.157044
O34090_C95	O34090	DVPSVIPEGLTLGUIPDR	hemC	Porphobilinogen deaminase	no	Enzyme		0.902298		0.101139		0.0899722		0.0175521			1.05339	0.751207	0.105033	0.0972448	0.0911243	0.08882	0.0756011	-0.0404969
Q2FXR7_C4	Q2FXR7	MNEUAFGTKDPVYLDYHDHVWGQPLYDSK	SAOUHSC_01768	Uncharacterized protein	no	Gene expression and Nucleic acid binding		0.764541						0.346151			0.892352	0.636729					0.0806577	0.611645
Q2FXP5_C148	Q2FXP5	LDVAMAADDIUTAITNGEQVK	SAOUHSC_01791	Uncharacterized protein	yes	Gene expression and Nucleic acid binding		1.00806						0.102325			1.02212	0.994					0.136323	0.0683269
Q2FZY4_C66	Q2FZY4	FEGEGUSISMASASMMTQAVK	SAOUHSC_00850	Uncharacterized protein	yes	Enzyme		0.582539		0.262784		0.178978		0.0850071			0.737687	0.427392	0.257493	0.268075	0.235482	0.122474	0.185359	-0.015345
Q2FVC1_C536	Q2FVC1	LYVSLKUPNFDDVAQK	pgcA	Phosphoglucomutase	no	Enzyme		0.529129		0.515861				0.06127			0.633013	0.425244	0.304978	0.726744			0.0532504	0.0692897
Q2G0N1_C596	Q2G0N1	KUDPVILEPMMK	fusA	Elongation factor G	yes	Gene expression and Nucleic acid binding		0.848903		0.0901523		0.0695958		0.095716			1.00475	0.693052	0.132906	0.0473988	0.0471195	0.0920721	0.135404	0.0560285
Q2FZJ3_C196	Q2FZJ3	TETGQILLADEISPDTUR	purC	Phosphoribosylaminoimidazole-succinocarboxamide synthase	no	Enzyme		0.932166		0.260697				-0.0894317			1.29186	0.572467	0.316377	0.205017			-0.128537	-0.0503266
Q2FXP2_C157	Q2FXP2	GVNDNQLDIEAFDIFSNASCTTNUIGPVAK	SAOUHSC_01794	Glyceraldehyde-3-phosphate dehydrogenase	no	Enzyme	Functional site	0.645705		0.389317		-0.0362161		0.101209			0.88096	0.41045	0.47892	0.299714	0.218471	-0.290904	0.15056	0.0518593
Q2G0W6_C69	Q2G0W6	VLIEQMAQHUEAFK	SAOUHSC_00408	Uncharacterized protein	no	not assigned		0.843843		0.176464		-0.0321235		0.111389			0.860844	0.826843	0.236829	0.116099	-0.0847315	0.0204844	0.081476	0.141302
Q2FZT0_C39	Q2FZT0	VNVDDEGVCTVDMTLTSMGUPMGPQIIDQVK	SAOUHSC_00910	Uncharacterized protein	no	not assigned		0.731		0.21477		0.115902		0.0366166			0.875308	0.586693	0.231801	0.19774	0.135272	0.0965317	0.0500489	0.0231844
Q2FZC5_C117	Q2FZC5	AQFVUVISMSGPDMETK	SAOUHSC_01107	dITP/XTP pyrophosphatase	no	Enzyme		0.793645		0.136835		0.161441		0.00590991			0.865523	0.721766	0.197111	0.0765591	0.311387	0.0114956	0.0938306	-0.0820108
Q2FXX1_C228	Q2FXX1	HVEVQVMGDGQDNYVHLGERDUSVQR	SAOUHSC_01709	Acetyl-CoA carboxylase, biotin carboxylase, putative	no	Enzyme		1.31073						-0.214032			1.37896	1.24251					0.0143553	-0.442418
Q2FV94_C112	Q2FV94	IDIIEEEGDSIGQHPNUAYIK	SAOUHSC_02840	L-serine dehydratase, iron-sulfur-dependent, beta subunit	no	Enzyme		0.828758		0.325666		-0.0588542					0.72334	0.934177	0.372395	0.278936	-0.0409718	-0.0767367
Q2G031_C337	Q2G031	LFADELEGAHTVVWNGPMGVFEFSNFAQGTIGVUK	pgk	Phosphoglycerate kinase	yes	Enzyme		0.807739		0.050686				0.232258			0.898092	0.717386	0.00619029	0.0951818			0.330558	0.133958
Q2G297_C180	Q2G297	TIDULNYYNYSDER	SAOUHSC_01696	Uncharacterized protein	no	not assigned		0.906978		-0.0683605		0.0928757		0.155929			0.929867	0.88409	-0.032551	-0.10417	0.168257	0.0174944	0.289952	0.0219061
Q2FUZ8_C299	Q2FUZ8	HIEFLLDDFSESYEPGDUIVALPQNDPELVEK	SAOUHSC_02947	Sulfite reductase [NADPH] flavoprotein alpha-component	no	Enzyme		0.996524				0.0419359		0.0489069			0.90912	1.08393			-0.176756	0.260628	0.0401209	0.0576929
Q2FX16_C47	Q2FX16	CSHUAVGYTLQTVDPEPLDMDLIYR	SAOUHSC_02090	Conserved hypothetical phage protein	no	Enzyme		0.967118		0.0922131				0.0248614			1.13731	0.79693	-0.183392	0.367818			0.126444	-0.0767215
Q2FZC7_C238	Q2FZC7	LNALMGTGGLQQCGNSQNCVNAUPK	SAOUHSC_01105	Iron-sulphur subunit of succinate dehydrogenase, putative	no	not assigned		0.514775		0.42776		0.131656		0.00903984			0.617581	0.411969	0.402504	0.453017	0.228111	0.0352016	0.0486547	-0.030575
Q2G002_C187	Q2G002	NDVLNLLQAMSTFSDTMDUK	aroD	3-dehydroquinate dehydratase	no	Enzyme				0.630994		0.452101							0.472384	0.789604	0.595026	0.309176
Q2FYN0_C47	Q2FYN0	HYQQLINQUK	SAOUHSC_01405	Uncharacterized protein	no	not assigned		0.737032		0.251813				0.0934807			0.819995	0.654069	0.348006	0.15562			0.179766	0.0071955
Q2G1B7_C42	Q2G1B7	TEFEVVVVDDUSTDQTLQIVEK	SAOUHSC_00228	Uncharacterized protein	no	Enzyme		1.01732						0.0614365			1.45518	0.57947					0.161694	-0.0388212
Q2FZJ1_C188	Q2FZJ1	GNVUGMMPHPER	purQ	Phosphoribosylformylglycinamidine synthase subunit PurQ	no	Enzyme	Functional site	1.19395		0.699003		-0.202371		-0.615008			1.26562	1.12228	0.705668	0.692338	-0.275577	-0.129166	-0.501729	-0.728287
Q2FVL8_C160	Q2FVL8	AIVIGGGLLGLEUAR	SAOUHSC_02684	Assimilatory nitrite reductase [NAD(P)H], large subunit, putative	no	Enzyme		0.701917		0.300882		0.137867		-0.0666693			0.811103	0.592731	0.349924	0.251839	0.182625	0.0931084	-0.0208765	-0.112462
Q2G2D0_C679	Q2G2D0	GYEUGITIENYNDLK	infB	Translation initiation factor IF-2	yes	Gene expression and Nucleic acid binding		0.76276		0.248611		0.020962		0.0408877			0.839247	0.686273	0.0793543	0.417868	0.0506062	-0.00868224	0.0607297	0.0210458
Q2FXH9_C83	Q2FXH9	GNDVLGILUHVDVVPAGDGWDSNPFEPVVTEDAIIAR	SAOUHSC_01868	Putative dipeptidase SAOUHSC_01868	no	Enzyme	Functional site	0.727591				0.0772311		0.261146			0.770364	0.684819			0.218595	-0.064133	0.23352	0.288772
Q2FWL2_C287	Q2FWL2	QSLADQUK	tsaD	tRNA N6-adenosine threonylcarbamoyltransferase	yes	Enzyme		1.0144		0.505717		-0.336179		-0.121768			1.07259	0.956205	0.497842	0.513592	0.0373119	-0.70967	-0.0764172	-0.167118
Q2FXU4_C284	Q2FXU4	GLDYYTHTAFELMMDNPNYDGAITTLUGGGR	hisS	Histidine--tRNA ligase	yes	Gene expression and Nucleic acid binding		0.617033		0.237915		-0.0866626		0.291222			0.699107	0.534958	0.210514	0.265317	0.125916	-0.299241	0.450591	0.131853
Q2FWM0_C292	Q2FWM0	TIHYNYFEAGQUAMEEIQQMLK	SAOUHSC_02269	Sucrose operon repressor, putative	no	Gene expression and Nucleic acid binding		1.05604									1.10963	1.00245
Q2FVM0_C233	Q2FVM0	LQHYSIEAKPGIUIIGEVVDYTENTPK	SAOUHSC_02682	Uroporphyrin-III C-methyltransferase, putative	no	Enzyme				1.05076									1.09038	1.01114
P60430_C188	P60430	MILSTUR	rplB	50S ribosomal protein L2	yes	Modulator/Scaffolding/Adaptor		0.861684		0.0740013		-0.0117869		0.125245			0.954866	0.768502	0.141956	0.00604663	0.016211	-0.0397849	0.204767	0.0457225
Q2G0J1_C143	Q2G0J1	LYPELPHSDYIUFYPMNKR	SAOUHSC_00573	Putative heme-dependent peroxidase SAOUHSC_00573	no	Enzyme		0.752673						0.294886			0.728399	0.776946					0.181929	0.407842
Q2FY04_C89	Q2FY04	ASLVSAISQGYRPGDFESITVTVDADKPSSPUGACR	SAOUHSC_01670	Cytidine deaminase	no	Enzyme		0.744848		0.0187617		0.261016		0.0225806			0.485015	1.00468	-0.112646	0.15017	0.750349	-0.228317	0.177344	-0.132183
Q2G2V3_C193	Q2G2V3	NHYASAIGUK	menE	2-succinylbenzoate--CoA ligase	no	Enzyme		1.0291						0.0179894			1.25936	0.798839					0.0399806	-0.00400181
Q2FYH6_C253	Q2FYH6	SVLENUK	asnS	Asparagine--tRNA ligase	no	Gene expression and Nucleic acid binding		0.634888		0.257236		0.0247055		0.129705			0.738172	0.531604	0.288906	0.225567	0.0940691	-0.0446581	0.145297	0.114112
P72360_C191	P72360	MSELTSSYEPPIEAUGTWR	scdA	Iron-sulfur cluster repair protein ScdA	no	not assigned		0.511534		0.0749819		0.216907		0.238588			0.633943	0.389126	0.0779266	0.0720372	0.128953	0.304861	0.353775	0.123401
Q2FWD5_C4	Q2FWD5	EVUPYLEETFK	SAOUHSC_02364	Uncharacterized protein	no	not assigned		0.652425		0.217912		0.0246726		0.145857			0.816284	0.488566	0.255803	0.180021	0.0224743	0.0268709	0.197614	0.0941009
Q2FWD1_C505	Q2FWD1	LVEMVEIPTNDFFIAUQFHPEFLSR	pyrG	CTP synthase	yes	Enzyme	Functional site	0.542867		0.12189		0.119389		0.248671			0.702569	0.383165	0.199876	0.0439044	0.223423	0.0153548	0.361544	0.135798
Q2FYH2_C229	Q2FYH2	ELMYTTGULEIEHGDANEGVLLLK	SAOUHSC_01480	Uncharacterized protein	no	not assigned		0.659077		0.0807047		0.0839901		0.205882			0.816231	0.501923	0.200379	-0.0389694	0.138421	0.0295589	0.258217	0.153546
Q2G233_C17	Q2G233	GTFSYLAUR	SAOUHSC_02135	Uncharacterized protein	no	Enzyme		0.830482						0.196539			0.904966	0.755998					0.232415	0.160662
Q2FXH2_C159	Q2FXH2	GLAYVDEVAVNWUPALGTVLSNEEVIDGVSER	leuS	Leucine--tRNA ligase	yes	Gene expression and Nucleic acid binding		0.663436		0.0519735		0.12088		0.190427			0.74528	0.581592	0.114634	-0.0106866	0.140648	0.101112	0.242694	0.138159
Q2FXM9_C144	Q2FXM9	EVKUDILNSGELK	pyk	Pyruvate kinase	yes	Enzyme		0.53337		0.487544		0.169136		-0.166668			0.688673	0.378068	0.522899	0.452189	0.197362	0.14091	-0.0381202	-0.295215
Q2G2C7_C150	Q2G2C7	EESLHHIPDEVSYQSAAMTEPLAUAHHGVSK	SAOUHSC_00217	Sorbitol dehydrogenase, putative	no	Enzyme				1.0188									0.785425	1.25217
Q2FZC8_C296	Q2FZC8	EIFDVUINQK	SAOUHSC_01104	Succinate dehydrogenase, flavoprotein chain TC0881, putative	no	Enzyme		0.856412		0.0760475		0.0216728		0.0539665			0.931759	0.781066	0.131326	0.0207689	0.107554	-0.0642084	0.111298	-0.0033654
Q2G1G5_C27	Q2G1G5	IIAAVGGMDNIDSVMNUMTR	SAOUHSC_00158	PTS system EIIBC component SAOUHSC_00158	no	Receptor/Transporter/Channel	Functional site	0.904491		0.156184		-0.127861		0.073713			1.00468	0.804301	0.135535	0.176833	0.047678	-0.303401	0.149389	-0.0019634
Q2FY02_C95	Q2FY02	VLGDIIIUTDVAQEQANNYGHSFER	ybeY	Endoribonuclease YbeY	yes	Enzyme		0.77983		0.0689835		-0.0218168		0.179003			0.926834	0.632827	0.0594937	0.0784732	0.0545012	-0.0981349	0.264717	0.0932897
Q2G2W9_C203	Q2G2W9	LMUCLKYENDYYEEVR	SAOUHSC_00455	Uncharacterized protein	no	not assigned		0.822523						0.182704			1.04173	0.603312					0.170438	0.19497
Q2FY68_C81	Q2FY68	DNUFISIMAGIPIDYIK	proC	Pyrroline-5-carboxylate reductase	no	Enzyme		0.737267		0.0438758		0.0337276		0.190018			0.893906	0.580628	0.0607392	0.0270125	0.0535284	0.0139267	0.218471	0.161565
Q2G0S6_C103	Q2G0S6	SUVEVAR	SAOUHSC_00468	Uncharacterized protein	no	not assigned		0.537644		0.113428		0.299316		0.0519968			0.631151	0.444137	0.304277	-0.0774215	0.0458623	0.552771	0.000865357	0.103128
Q2FXU4_C208	Q2FXU4	ILDUKVDR	hisS	Histidine--tRNA ligase	yes	Gene expression and Nucleic acid binding		0.712627		0.232799		-0.035372		0.0891281			0.769714	0.65554	0.323774	0.141825	0.0992279	-0.169972	0.143158	0.0350983
Q2G263_C150	Q2G263	QADAFUFTFIPLNVIDTFK	SAOUHSC_00096	Transcriptional regulator, GntR family, putative	no	Gene expression and Nucleic acid binding		0.571057		0.0877311		0.169609		0.167953			0.658646	0.483468	0.292311	-0.116848	0.245252	0.0939658	0.221939	0.113967
Q2G1A9_C248	Q2G1A9	IGTMISHVPIYPYSUHPK	SAOUHSC_00236	6-phospho-beta-glucosidase, putative	no	Enzyme		0.994579									0.992768	0.996389
Q2FY19_C131	Q2FY19	HKLEVYGVUESCQD	fur	Ferric uptake regulation protein	no	Gene expression and Nucleic acid binding		0.716992		0.26156		0.057202		-0.0414616			0.732834	0.70115	0.252173	0.270947	0.181421	-0.0670166	-0.0368514	-0.0460718
Q2G0Y7_C307	Q2G0Y7	VGIGPGSIUTTR	guaB	Inosine-5'-monophosphate dehydrogenase	no	Enzyme	Functional site	0.671102		0.162819		0.100704		0.0591435			0.742696	0.599508	0.188528	0.13711	0.12075	0.0806577	0.108223	0.0100637
O07325_C175	O07325	CVEAUGVDVLDVYSDAYNYGSILTATEK	ftsA	Cell division protein FtsA	yes	not assigned		0.994066						-0.00332318			1.00526	0.982875					-0.0136983	0.00705194
Q2G266_C428	Q2G266	SEYHHCPVILGSATPULESYAR	priA	Primosomal protein N'	yes	Gene expression and Nucleic acid binding		0.989563									1.16659	0.812539
Q2FWG2_C16	Q2FWG2	IENPLTIUYTNDVVK	thiM	Hydroxyethylthiazole kinase	no	Enzyme		0.882722						0.106378			0.949049	0.816395					0.157561	0.0551957
Q2FXP2_C202	Q2FXP2	SUNESIIPTSTGAAK	SAOUHSC_01794	Glyceraldehyde-3-phosphate dehydrogenase	no	Enzyme		1.01977		0.32799		-0.183064		-0.177168			1.10461	0.934932	0.349252	0.306729	-0.0440921	-0.322036	-0.0449402	-0.309395
Q2G098_C295	Q2G098	NNTDLTQILTSLFPUGSITGAPK	SAOUHSC_00723	Uncharacterized protein	no	Enzyme		0.505178		0.168048		0.104873		0.205756			0.668028	0.342327	0.323312	0.0127832	0.104202	0.105544	0.354791	0.0567222
Q2G2C3_C38	Q2G2C3	VQLDNLTLPSUPLYEEVLDTQMFGLQK	SAOUHSC_01062	UPF0358 protein SAOUHSC_01062	no	not assigned		0.682953		0.146662		0.0278388		0.12066			0.797096	0.56881	0.165558	0.127765	0.0575542	-0.00187672	0.215865	0.0254541
Q2FVV9_C63	Q2FVV9	SUSTVIDRPMTVNTVNNDVK	SAOUHSC_02582	Putative formate dehydrogenase SAOUHSC_02582	no	Enzyme	Functional site	0.552433		0.237242		0.102786		0.0847322			0.611922	0.492944	0.210468	0.264016	0.150264	0.0553085	0.132515	0.0369493
Q2G0B7_C166	Q2G0B7	ALAPLUDTK	SAOUHSC_00688	Cytokinin riboside 5'-monophosphate phosphoribohydrolase	no	not assigned		0.716186		0.149109		0.0763701		0.0345281			0.82432	0.608052	0.234992	0.0632268	0.140386	0.0123541	0.0947766	-0.0257203
Q2G2G0_C133	Q2G2G0	YDEVTIYUK	SAOUHSC_00717	Uncharacterized protein	no	not assigned		0.719284		0.0111853		0.152542		0.0931714			0.842018	0.59655	0.0453032	-0.0229326	0.273406	0.0316783	0.146066	0.0402771
Q2FVC3_C259	Q2FVC3	TILUALDVR	SAOUHSC_02790	Uncharacterized protein	no	Gene expression and Nucleic acid binding		0.873528						0.0886435			1.04404	0.703012					0.0994972	0.0777899
Q2G000_C32	Q2G000	FEAGWCPDUR	SAOUHSC_00834	Thioredoxin, putative	no	Enzyme		0.323266				0.443507		0.194182			0.0758749	0.570657			0.0771062	0.809908	-0.377594	0.765959
Q2FZ75_C86	Q2FZ75	GESLYDTUK	pyrB	Aspartate carbamoyltransferase	no	Enzyme		0.726796		0.196987		-0.0429866		0.0784925			0.722487	0.731105	0.438395	-0.0444223	-0.111711	0.0257376	-0.0228539	0.179839
Q2FZS0_C112	Q2FZS0	VASMDQLAAUSGFMYSMITAK	fabH	3-oxoacyl-[acyl-carrier-protein] synthase 3	yes	Enzyme	Functional site	0.697848		0.185582		0.0473286		0.0274729			0.78509	0.610606	0.206893	0.164271	0.105678	-0.0110209	0.0500489	0.00489684
Q2FZ02_C145	Q2FZ02	ERPDILIGVUGCMSQEESVVNK	miaB	tRNA-2-methylthio-N(6)-dimethylallyladenosine synthase	no	not assigned	Functional site	0.925289						0.0272384			1.03787	0.812704					0.142348	-0.0878714
Q2FZX3_C81	Q2FZX3	FSNIQDYIFEYCNFGUPYFVLR	SAOUHSC_00862	Uncharacterized protein	no	not assigned		0.948107									1.06053	0.835682
Q2G263_C42	Q2G263	YPSGHALPTEKELUAR	SAOUHSC_00096	Transcriptional regulator, GntR family, putative	no	Gene expression and Nucleic acid binding	Functional site	0.82816		0.0432668		0.0051768		0.0675879			0.940891	0.715429	0.134685	-0.0481512	0.165136	-0.154782	0.0809248	0.0542509
Q2FYK4_C144	Q2FYK4	DAFDENUK	SAOUHSC_01436	UPF0403 protein SAOUHSC_01436	no	not assigned		0.087751		0.150776		0.436278		0.268705			0.188585	-0.0130825	0.238104	0.0634471	0.479955	0.3926	0.328596	0.208813
Q2FVY0_C386	Q2FVY0	SGAVVAIAHANUMVMLPGGSR	SAOUHSC_02542	Molybdopterin biosynthesis protein moeA, putative	no	not assigned		0.70426		-0.0445208		0.069245		0.208695			0.810155	0.598365	0.064469	-0.153511	0.386701	-0.248211	0.324235	0.0931545
Q2G0R9_C3	Q2G0R9	MKUIVGLGNIGK	pth	Peptidyl-tRNA hydrolase	yes	Gene expression and Nucleic acid binding		0.509004						0.426996			0.645056	0.372952					0.156397	0.697596
Q2FXK7_C78	Q2FXK7	GVUGTAVSER	SAOUHSC_01828	GAF domain protein	no	not assigned		0.494055		0.0837105		0.210639		0.144752			0.491391	0.496718	0.179256	-0.0118352	0.0732718	0.348006	0.138683	0.15082
Q2G2D0_C633	Q2G2D0	VGTIAGUYVTEGK	infB	Translation initiation factor IF-2	yes	Gene expression and Nucleic acid binding		0.872741		0.114558		-0.163345		0.108515			0.955462	0.790021	0.119555	0.109561	-0.349732	0.0230424	0.176067	0.0409625
Q2G0M0_C62	Q2G0M0	WSFQTEMFFLUNR	SAOUHSC_00540	Uncharacterized protein	no	Enzyme		0.513497		0.278071				0.140849			0.454492	0.572502	0.326307	0.229834			0.110363	0.171335
Q2FXV0_C25	Q2FXV0	EGQGUISLK	SAOUHSC_01732	Uncharacterized protein	no	Gene expression and Nucleic acid binding		0.751053		0.10203		0.0763301		-0.00149471			0.895992	0.606113	0.113613	0.0904463	0.130148	0.0225124	0.0906388	-0.0936282
Q2FY70_C3	Q2FY70	MNUQSESVVR	SAOUHSC_01595	Uncharacterized protein	no	not assigned		1.03036		-0.24864				0.145638			1.04845	1.01228	-0.247286	-0.249994			0.209391	0.081885
Q2FZ74_C224	Q2FZ74	DVLLAEAAGUHYHVCHVSTK	pyrC	Dihydroorotase	no	Enzyme		0.924978									1.1153	0.734655
Q2FY33_C203	Q2FY33	LFGANVILSQSGYTGEDGFEIYUNIDDTEK	gcvT	Aminomethyltransferase	no	Enzyme		0.655356		0.0426642		0.102312		0.117894			0.745797	0.564915	0.111298	-0.02597	0.254231	-0.0496062	0.196229	0.0395596
Q2FWD1_C229	Q2FWD1	IALFUDINK	pyrG	CTP synthase	yes	Enzyme	Functional site	0.546926		-0.0409795		0.196534		0.214223			0.65159	0.442263	0.0629448	-0.144904	0.216362	0.176706	0.292737	0.135708
Q2FVL8_C278	Q2FVL8	GIVVNDVMQTSDSNVYAVGEUAEHNGK	SAOUHSC_02684	Assimilatory nitrite reductase [NAD(P)H], large subunit, putative	no	Enzyme		0.983836		0.230994		-0.227509		-0.0723137			1.11583	0.851839	0.263996	0.197991	-0.0353574	-0.419662	0.232292	-0.37692
Q2FYF3_C118	Q2FYF3	FTITTTKDVYEUR	SAOUHSC_01499	Uncharacterized protein	no	Enzyme		0.651371				0.0441304		0.217373			0.746141	0.556601			-0.0241057	0.112367	0.0462815	0.388465
Q2FV63_C16	Q2FV63	SQEILNVEGMSCGHUK	copZ	Copper chaperone CopZ	no	not assigned	Functional site	0.580834				0.250964		0.0805465			0.669662	0.492007			0.360758	0.141171	0.0472592	0.113834
Q2G2R6_C14	Q2G2R6	VNENETIADULSR	SAOUHSC_02130	Uncharacterized protein	no	not assigned		0.638339		0.237221				0.0347418			0.863427	0.413252	0.155749	0.318693			0.0296042	0.0398793
Q2G1T4_C57	Q2G1T4	CIVFGUYENETLIATAALEQIR	SAOUHSC_00830	Uncharacterized protein	no	not assigned		0.699405						0.210477			0.86924	0.529571					-0.196062	0.617016
Q2G280_C44	Q2G280	DNTPTUTTEACDFRDNLEMFNDLDVAVYGISGDSK	SAOUHSC_01999	Uncharacterized protein	no	Enzyme	Functional site	0.732072						0.173726			0.853916	0.610228					0.298658	0.0487942
Q2FXW4_C124	Q2FXW4	AQENPIPLHWNAETLVTNHFQUNYWGK	SAOUHSC_01717	Uncharacterized protein	no	Enzyme								0.900352									0.511164	1.28954
Q2FZ23_C23	Q2FZ23	TGAGMMDUK	tsf	Elongation factor Ts	yes	Gene expression and Nucleic acid binding		0.57422		0.116793		0.114266		0.0914263			0.654755	0.493684	0.167825	0.0657602	0.131326	0.0972062	0.145481	0.0373712
Q2FW81_C16	Q2FW81	YKQDHLUEYEK	SAOUHSC_02423	Probable uridylyltransferase SAOUHSC_02423	no	Enzyme		0.683558		0.0588096		0.145542		0.00845812			0.801324	0.565792	0.0900404	0.0275787	0.149389	0.141694	0.0561673	-0.0392511
Q2G030_C189	Q2G030	SSTSEDANEMUAFVR	tpiA	Triosephosphate isomerase	yes	Enzyme		0.671999		0.12737		0.0820211		0.00824471			0.63171	0.712288	0.179001	0.075738	0.255199	-0.0911564	0.148609	-0.132119
Q2G116_C19	Q2G116	QHAUGTNR	SAOUHSC_00345	Uncharacterized protein	yes	not assigned		0.483145		0.31939				0.0864742			0.643963	0.322327	0.362105	0.276675			0.170376	0.00257273
Q2FZ86_C101	Q2FZ86	MULFEPR	sepF	Cell division protein SepF	yes	not assigned		0.848888				0.00482912		0.030545			0.981707	0.716069			0.0632268	-0.0535686	0.176578	-0.115488
Q2FW27_C133	Q2FW27	RICESUGTTYHLVFNPPK	adk	Adenylate kinase	yes	Enzyme	Functional site	0.490572						0.39138			0.870059	0.111086					0.446362	0.336398
Q2G0M9_C348	Q2G0M9	PGAFFLTGUGNESK	SAOUHSC_00531	Uncharacterized protein	no	not assigned		0.730667		0.13803		0.0349215		-0.0229315			0.537843	0.923492	-0.0597656	0.335826	0.30229	-0.232447	0.0573479	-0.103211
Q2G0R6_C202	Q2G0R6	SDGADNVVTUPLYELDHDENAFNNLTSVFVPK	SAOUHSC_00480	Uncharacterized protein	no	Enzyme		0.944799						-0.0711929			1.04264	0.846955					-0.0153013	-0.127085
Q2FZL5_C206	Q2FZL5	VEDETVQWUK	menB	1,4-dihydroxy-2-naphthoyl-CoA synthase	no	Enzyme		0.191955		0.249772		0.0930593		0.337166			0.227403	0.156506	0.271298	0.228246	0.143977	0.0421417	0.37146	0.302873
Q2FW37_C156	Q2FW37	AAQQFIGTHDFTGFUSQK	truA	tRNA pseudouridine synthase A	no	Gene expression and Nucleic acid binding		0.639841						0.231459			0.754717	0.524966					0.291839	0.171079
Q2FVA7_C95	Q2FVA7	VYMAULTEK	SAOUHSC_02826	Uncharacterized protein	no	Gene expression and Nucleic acid binding		0.585218				0.23209		0.0528965			0.743903	0.426533			-0.0559662	0.520146	0.0486547	0.0571383
Q2FZW6_C73	Q2FZW6	AGUGYVPVDTSIPEDR	dltA	D-alanine--D-alanyl carrier protein ligase	yes	Enzyme		0.718421		0.0362463		0.0299702		0.0819964			0.883777	0.553066	0.112233	-0.0397404	0.0972062	-0.0372659	0.135141	0.028852
Q2FWE5_C64	Q2FWE5	YYGGUEFVDVTESIAIDR	glyA	Serine hydroxymethyltransferase	no	Enzyme	Functional site	0.590062		0.0772874		0.0532141		0.145071			0.523976	0.656149	0.164143	-0.00956787	0.0803249	0.0261033	0.0890135	0.201128
Q2FZX4_C68	Q2FZX4	TATFMILGAVUTR	lipA	Lipoyl synthase	no	Enzyme	Functional site	0.54486		0.0730701		0.125523		0.120152			0.646643	0.443077	0.173606	-0.0274658	0.239287	0.0117587	0.259252	-0.0189481
Q2FZ87_C189	Q2FZ87	LNLEYAPUDELSMGMSNDYLIAVEEGATFVR	SAOUHSC_01153	Pyridoxal phosphate homeostasis protein	no	not assigned		1.0445		0.15201		0.110352		-0.443705			0.910195	1.17881	0.0854247	0.218595	0.14483	0.0758749	-0.922894	0.0354832
Q2FVV9_C267	Q2FVV9	TVCTYUGVGCSFEVWTK	SAOUHSC_02582	Putative formate dehydrogenase SAOUHSC_02582	no	Enzyme	Functional site	0.684384						0.176623			0.796265	0.572502					0.302641	0.0506062
Q2G0Q1_C130	Q2G0Q1	DQFTVPFVCGUR	pdxS	Pyridoxal 5'-phosphate synthase subunit PdxS	no	Enzyme		0.368171		-0.16		0.363635		0.28915			0.444031	0.292311	-0.132646	-0.187353	0.317526	0.409743	0.379206	0.199094
Q2G0G1_C37	Q2G0G1	PGEALVQTEYCGVUHTDLHVK	adh	Alcohol dehydrogenase	no	Enzyme	Functional site	0.840585		0.138314		-0.120167		0.000937359			1.27308	0.40809	0.245374	0.031254	-0.0203258	-0.220009	0.000432744	0.00144197
Q2FV20_C110	Q2FV20	NVUQAVVYISGQK	SAOUHSC_02920	2-dehydropantoate 2-reductase	no	Enzyme								0.856832									0.751892	0.961771
Q2FZU6_C353	Q2FZU6	GLFIGVELNESARPYUEALKEEGLLCK	rocD	Ornithine aminotransferase	no	Enzyme		0.546575		0.131032		0.172098		0.00357325			0.611645	0.481506	0.185232	0.0768327	0.195977	0.148218	0.0100637	-0.00291719
Q2FYZ2_C240	Q2FYZ2	EVQQLVEQGYESUQSMQAIGYK	miaA	tRNA dimethylallyltransferase	no	Gene expression and Nucleic acid binding		0.851302									0.992696	0.709908
Q2FXZ8_C191	Q2FXZ8	TAQTVTDLRPAGIIFUENERIDAVSDGNFILR	SAOUHSC_01677	Uncharacterized protein	no	not assigned		0.690863				0.160082					0.842295	0.539432			0.173639	0.146525
Q2FYJ2_C18	Q2FYJ2	VAUTPENVR	ald1	Alanine dehydrogenase 1	no	Enzyme		0.708792		0.0672053		-0.0374881		0.107709			0.811836	0.605748	0.164684	-0.0302733	0.0213376	-0.0963138	0.198993	0.016425
Q2FVG5_C47	Q2FVG5	WMHPUYTLNNK	SAOUHSC_02747	Uncharacterized protein	no	not assigned		0.559115						0.285826			0.854474	0.263756					0.0268709	0.544782
Q2FWD3_C161	Q2FWD3	EUQELVEK	SAOUHSC_02366	Uncharacterized protein	yes	Enzyme		0.592554		0.0221276		0.0747716		0.154583			0.704971	0.480137	0.098105	-0.0538497	0.0671614	0.0823817	0.203082	0.106084
Q2FWL2_C259	Q2FWL2	AIQAUKEYGVQR	tsaD	tRNA N6-adenosine threonylcarbamoyltransferase	yes	Enzyme				0.810318				0.0305003					0.892585	0.728051			0.0422241	0.0187766
Q2FZZ6_C291	Q2FZZ6	STDLEAMKFDDYMYSWDUS	SAOUHSC_00838	Uncharacterized protein	no	not assigned		0.918374						-0.0785239			1.00317	0.833578					-0.0407937	-0.116254
Q2FXD1_C350	Q2FXD1	LTHANLUNINLK	SAOUHSC_01932	Type I restriction-modification enzyme, S subunit, EcoA family, putative	no	Gene expression and Nucleic acid binding		0.716959						0.121588			0.808179	0.625738					0.129876	0.1133
Q2G111_C16	Q2G111	VUYFTANGITHIDYK	rpsR	30S ribosomal protein S18	yes	Modulator/Scaffolding/Adaptor		0.706683		0.20929		-0.047008		-0.0307392			0.783216	0.630151	0.212507	0.206073	-0.0176897	-0.0763262	-0.00250572	-0.0589727
Q2FZ54_C144	Q2FZ54	GQLMAQAFPTGVGSMAAVLGLDFDKVDEIUK	SAOUHSC_01198	Malonyl CoA-acyl carrier protein transacylase	yes	Enzyme		0.726991		0.0121726		0.00110819		0.0975947			0.668961	0.785022	0.0563061	-0.0319609	0.0458623	-0.0436459	0.204318	-0.00912845
Q2FZJ1_C148	Q2FZJ1	VIYPVAHGEGHYYUTDEIYQQLK	purQ	Phosphoribosylformylglycinamidine synthase subunit PurQ	no	Enzyme				0.352093		0.482349							-0.0081018	0.712288	0.834954	0.129745
Q2FZ04_C16	Q2FZ04	NNVKPNWUPGCGDFSVQAAIQK	SAOUHSC_01267	Uncharacterized protein	no	Enzyme		0.82732						0.00633641			1.10561	0.549028					0.0280033	-0.0153305
Q2G282_C142	Q2G282	MEIYGVUK	perR	Peroxide-responsive repressor PerR	no	Gene expression and Nucleic acid binding	Functional site	0.508376		0.505987		-0.139841		-0.0431525			0.598348	0.418404	0.567167	0.444808	-0.0161222	-0.26356	-0.00441887	-0.081886
Q2FUY3_C201	Q2FUY3	LLIMUGK	SAOUHSC_02962	Tributyrin esterase, putative	no	Enzyme		0.632308						0.199005			0.815821	0.448795					0.257493	0.140517
Q2FYV2_C82	Q2FYV2	YSVDLPNLUIEMR	thrB	Homoserine kinase	no	Enzyme		0.545324						0.284993			0.603881	0.486766					0.303109	0.266876
Q2FXH2_C498	Q2FXH2	ETNTMPQWAGSUWYYLR	leuS	Leucine--tRNA ligase	yes	Gene expression and Nucleic acid binding		0.536834		0.105275		0.0535577		0.127931			0.63733	0.436338	0.104337	0.106214	0.0713508	0.0357647	0.121981	0.133881
Q2FV16_C275	Q2FV16	HLGGFPISGQFLAUTNPQVIEQHDAK	mqo	Probable malate:quinone oxidoreductase	no	Enzyme		0.874936		0.434682		-0.0256254		-0.462565			0.975117	0.774755	0.480679	0.388686	0.0106366	-0.0618874	-0.433701	-0.491429
Q2FYS9_C443	Q2FYS9	TGDIAIAAITSUTNTSNPYVMLGAGLVAK	SAOUHSC_01347	Aconitate hydratase	no	Enzyme		0.528557		0.0937931		0.0903554		0.108708			0.609377	0.447738	0.148869	0.0387171	0.151859	0.028852	0.14483	0.072586
Q2G2G9_C101	Q2G2G9	EEISEQAISEVIEYUYR	recX	Regulatory protein RecX	no	not assigned		0.693124						0.126568			0.840953	0.545294					0.158803	0.0943325
Q2G0T9_C257	Q2G0T9	QTFGNTDMMTIGEMSSTTIENUIK	SAOUHSC_00438	Alpha amylase family protein, putative	no	Enzyme		0.857635				-0.0262625		-0.0143823			0.843662	0.871607			0.0347792	-0.0873042	0.0936954	-0.12246
Q2G2C1_C259	Q2G2C1	IUDAAIQLMENIK	SAOUHSC_01064	Pyruvate carboxylase	no	Enzyme		0.652717		0.0582361		0.0647074		0.0349478			0.747388	0.558046	0.0790196	0.0374525	0.0947766	0.0346383	0.161328	-0.0914325
Q2FVV9_C37	Q2FVV9	SQDTFVPSIUYNESMGPIQTCDTCTVEIDGK	SAOUHSC_02582	Putative formate dehydrogenase SAOUHSC_02582	no	Enzyme	Functional site	0.658782						0.151182			0.746227	0.571337					0.0465609	0.255803
Q2G2Q5_C64	Q2G2Q5	DUNVSKDIFK	SAOUHSC_00278	Uncharacterized protein	no	not assigned				0.631698		0.108397		0.0687198					0.718614	0.544782	0.296546	-0.0797524	0.0363275	0.101112
Q2FWY3_C46	Q2FWY3	GTYDIUKPLTIYGNTTLLLDNETILR	SAOUHSC_02138	Uncharacterized protein	no	not assigned		0.25749						0.549791			0.38405	0.130931					0.724738	0.374845
Q2FY52_C271	Q2FY52	KADUNEK	SAOUHSC_01613	2-oxoisovalerate dehydrogenase, E1 component, alpha subunit, putative	no	Enzyme		0.652395		0.339042		0.0351537		-0.222335			0.787767	0.517024	0.38648	0.291604	0.0783366	-0.00802926	-0.176756	-0.267913
Q2FX05_C19	Q2FX05	EIGYIUAK	map	Methionine aminopeptidase	yes	Enzyme		0.956904		0.705169		-0.382735		-0.478633			1.02006	0.893751	0.728574	0.681764	-0.322758	-0.442712	-0.493398	-0.463868
Q2FY54_C389	Q2FY54	NMVNLUISIDHR	SAOUHSC_01611	Dihydrolipoamide acetyltransferase component of pyruvate dehydrogenase complex	no	Enzyme								0.795541									1.07587	0.515208
Q2FXL3_C60	Q2FXL3	LISVVPSIDTGVUDQQTR	tpx	Thiol peroxidase	no	Enzyme	Functional site	0.477964		0.129915		0.0645929		0.121837			0.51401	0.441917	0.139247	0.120583	0.102457	0.0267293	0.152285	0.091388
Q2FZP0_C494	Q2FZP0	ISUSDNFIVK	SAOUHSC_00960	Uncharacterized protein	no	not assigned		0.747343		0.106759		-0.0867067		0.025514			0.829931	0.664756	0.134089	0.0794293	0.0265876	-0.200001	0.109561	-0.0585331
Q2G0V7_C46	Q2G0V7	HLAAELNDQGFSUYAPNYPGHGLLLK	SAOUHSC_00417	Uncharacterized protein	no	Enzyme		0.642587		0.0428342		0.0334988		0.0737089			0.618145	0.667029	0.0352016	0.0504669	0.0989585	-0.0319609	-0.0973475	0.244765
Q2FZ43_C86	Q2FZ43	VILMUPQGEPFSHQK	trmD	tRNA (guanine-N(1)-)-methyltransferase	yes	Gene expression and Nucleic acid binding		0.748678		-0.236625		0.162258		0.117504			0.853038	0.644318	0.0344975	-0.507747	0.334911	-0.0103959	0.130404	0.104605
Q2G1G0_C28	Q2G1G0	GLIGDUIQPIIEPIK	SAOUHSC_00164	Uncharacterized protein	no	not assigned		0.700651						0.0887955			0.756816	0.644486					0.0920488	0.0855423
Q2G1W0_C168	Q2G1W0	SULNDCYDK	SAOUHSC_02574	Uncharacterized protein	no	Enzyme		0.918505		0.0808482				-0.213028			1.07649	0.760519	0.203514	-0.0418181			-0.202813	-0.223242
Q2FXJ5_C37	Q2FXJ5	EQVTLYUGADPTADSLHIGHLLPFLTLR	tyrS	Tyrosine--tRNA ligase	yes	Gene expression and Nucleic acid binding	Functional site	0.682216		0.0685679		0.0212648		0.0138729			0.785927	0.578504	0.0422241	0.0949116	0.0234683	0.0190614	0.0908534	-0.0631077
O52582_C43	O52582	DMSFANUALPYVIGEVVEDR	cdr	Coenzyme A disulfide reductase	no	Enzyme	Functional site	0.761553		-0.0198604		-0.0592603		0.102992			0.844717	0.678389	0.0825664	-0.122287	-0.0352573	-0.0832633	0.140058	0.0659251
Q2FZ75_C53	Q2FZ75	TKUSFEMAELK	pyrB	Aspartate carbamoyltransferase	no	Enzyme		0.780325									0.868134	0.692516
Q2FVP8_C283	Q2FVP8	GFGNTTTSIPGIYAUGDIVYHDAK	SAOUHSC_02654	Ferredoxin--NADP reductase	no	Enzyme	Functional site	0.778681									0.813114	0.744247
Q2G229_C64	Q2G229	AGNTTFLCGVNDDRVDEILSVINQTUGNR	SAOUHSC_00452	Uncharacterized protein	no	not assigned		0.59057		0.235787		0.0303899		-0.083017			0.773406	0.407733	0.206018	0.265557	0.206768	-0.145988	0.0596322	-0.225666
Q2G240_C97	Q2G240	IAANQINDNEULFIDAGSSTLELIK	SAOUHSC_00706	Uncharacterized protein	no	Gene expression and Nucleic acid binding		1.16915						-0.397021			1.32953	1.00877					-0.358177	-0.435866
Q2G0Q5_C80	Q2G0Q5	TEEULHR	SAOUHSC_00491	2-amino-4-hydroxy-6-hydroxymethyldihydropteridine pyrophosphokinase	yes	Enzyme				-0.0324975		0.665947		0.13383					0.23008	-0.295075	0.184978	1.14692	0.27023	-0.00257029
Q2FYK5_C247	Q2FYK5	EUGLEVGEFVHTFGDAHIYSNHIDAIQTQLAR	thyA	Thymidylate synthase	yes	Enzyme		0.417196		0.349529							0.515006	0.319387	0.42417	0.274888
Q2G1Y5_C71	Q2G1Y5	AGEYEDUK	ldh2	L-lactate dehydrogenase 2	no	Enzyme	Functional site	0.599292		0.106579		0.0735791		-0.0128833			0.541217	0.657366	0.206393	0.00676478	0.245617	-0.0984592	-0.0639218	0.0381552
Q2FY08_C230	Q2FY08	EFEQMELEFFUKPGEEIEWQNYWK	glyQS	Glycine--tRNA ligase	yes	Modulator/Scaffolding/Adaptor		0.717339		0.320088		-0.0772517		-0.194638			0.765617	0.669062	0.201803	0.438372	-0.169858	0.0153548	0.0880059	-0.477281
Q2FY73_C143	Q2FY73	LTFHGVCETUQAK	SAOUHSC_01592	Transcriptional regulator, Fur, putative	yes	Gene expression and Nucleic acid binding		0.561322		0.064188		0.0629625		0.0664017			0.78442	0.338225	0.0989585	0.0294175	0.176323	-0.0503978	0.0802483	0.052555
Q2FYZ4_C405	Q2FYZ4	DYGLTFSPUNTK	glpD	Aerobic glycerol-3-phosphate dehydrogenase	no	Enzyme		0.776399						-0.0226037			0.777199	0.775598					0.0275787	-0.0727862
Q2FV67_C473	Q2FV67	GUTSAVVGYHPFGGFK	rocA	1-pyrroline-5-carboxylate dehydrogenase	no	Enzyme		0.693329		0.00537818		-0.0123012		0.0673013			0.815903	0.570754	0.041243	-0.0304866	0.0391384	-0.0637409	0.113834	0.0207689
Q2FXI2_C93	Q2FXI2	IIUNDAIELNEYFKDGEVSR	trmB	tRNA (guanine-N(7)-)-methyltransferase	no	Gene expression and Nucleic acid binding	Functional site	0.697799						0.0534861			0.948601	0.446997					-0.307055	0.414027
Q2FXL9_C149	Q2FXL9	AAELADKUIEIGVSYLK	SAOUHSC_01816	Uncharacterized peptidase SAOUHSC_01816	no	not assigned		0.507293						0.242968			0.707963	0.306623					0.189704	0.296231
P69848_C24	P69848	LSVTDRUNFR	moaA	GTP 3',8-cyclase	no	Enzyme	Functional site			0.511156		0.0540544		0.183132					0.622649	0.399663	-0.0251917	0.1333	0.163628	0.202637
Q2FW96_C117	Q2FW96	TNHVNIVAUENAIMATDTLKK	mtlD	Mannitol-1-phosphate 5-dehydrogenase	no	Enzyme		0.748096									0.643394	0.852798
Q2FXF9_C245	Q2FXF9	SUDLTTILHNLYK	SAOUHSC_01889	Riboflavin biosynthesis protein RibD	no	Enzyme		0.586833		0.407557		-0.171353		-0.0777533			0.583327	0.590339	0.492725	0.32239	0.0302654	-0.372972	-0.292617	0.13711
Q2FV40_C90	Q2FV40	AIELUQK	SAOUHSC_02899	Uncharacterized protein	no	Enzyme		0.471751		0.193666				0.0789708			0.499578	0.443925	0.294312	0.0930192			0.134615	0.0233263
Q2FWM9_C146	Q2FWM9	EHEFLTAGEYVAEPFQLSDGTYVTQLIUYDLR	SAOUHSC_02259	Uncharacterized protein	no	not assigned		0.703502		0.0826603				-0.0418292			0.9151	0.491904	0.237197	-0.0718761			0.0640551	-0.147713
Q2FXP5_C72	Q2FXP5	HYDGHKFADUPNFVK	SAOUHSC_01791	Uncharacterized protein	yes	Gene expression and Nucleic acid binding		0.396668		0.254725				0.0915167			0.375957	0.41738	0.266757	0.242694			0.246955	-0.0639218
Q2G2R0_C63	Q2G2R0	VGEQVVSGNADLGVUICGTGVGINNAVNK	lacB	Galactose-6-phosphate isomerase subunit LacB	no	Enzyme		0.364259		0.29934		0.131054		-0.0520278			0.358715	0.369802	0.206143	0.392537	-0.033732	0.295841	0.0917315	-0.195787
Q2FXM5_C214	Q2FXM5	NMVMUDSR	SAOUHSC_01810	NADP-dependent malic enzyme, putative	no	Enzyme		0.662892		0.00785954		-0.0642468		0.130819			0.78031	0.545474	0.0471195	-0.0314005	-0.08516	-0.0433337	0.260628	0.00100953
Q2FWJ4_C217	Q2FWJ4	EIIQUTFIEGLSQK	SAOUHSC_02298	RNA polymerase sigma factor	no	Gene expression and Nucleic acid binding		0.677409						0.0588407			0.820159	0.534659					0.114367	0.00331439
Q2FZ86_C164	Q2FZ86	VGTDIFLUTPDNVEVAGSITDHIENMEHSFD	sepF	Cell division protein SepF	yes	not assigned		0.591502		0.203881		-0.063336		0.00313404			0.581592	0.601411	0.291132	0.116631	-0.0848539	-0.0418181	0.0381552	-0.0318871
Q2FYU4_C24	Q2FYU4	SEUDTTIQFGPK	guaC	GMP reductase	no	Enzyme		0.821896						-0.0931571			0.997907	0.645886					-0.141939	-0.0443747
Q2FYK5_C13	Q2FYK5	MLNSFDAAYHSLUEEVLEIGNTR	thyA	Thymidylate synthase	yes	Enzyme		0.616428		0.201945		-0.103922		0.0139034			0.717649	0.515208	0.25411	0.14978	-0.104915	-0.10293	0.0437644	-0.0159576
Q2G0L8_C64	Q2G0L8	AFYEAQAPVADTDLTVPYIULNGAEVR	SAOUHSC_00542	Uncharacterized protein	no	not assigned		0.630828						0.0936215			0.837378	0.424277					0.0978804	0.0893626
Q2G122_C715	Q2G122	SLFWVNPDUGLK	metE	5-methyltetrahydropteroyltriglutamate--homocysteine methyltransferase	no	Enzyme	Functional site	0.452786		0.128017		0.181309		-0.0423227			0.568032	0.33754	0.241108	0.0149265	0.231555	0.131063	-0.121957	0.0373119
Q2FY67_C215	Q2FY67	QGPVVAIFGDTKPUSNER	rnz	Ribonuclease Z	yes	Gene expression and Nucleic acid binding	Functional site							0.715924									0.306262	1.12558
Q2FZD9_C267	Q2FZD9	LRPSYFPFTEPSVEVDVSUFK	pheS	Phenylalanine--tRNA ligase alpha subunit	yes	Gene expression and Nucleic acid binding		0.482096		0.288952				-0.0624687			0.530271	0.433921	0.320773	0.257131			0.063641	-0.188578
Q2FXU7_C135	Q2FXU7	VHLMKEULDR	SAOUHSC_01735	Uncharacterized protein	no	Enzyme		0.439421		0.234327				0.0320902			0.45607	0.422771	0.292075	0.176578			0.0812033	-0.0170228
Q2G0B1_C12	Q2G0B1	EQLUFSLYNAQR	mgrA	HTH-type transcriptional regulator MgrA	no	Gene expression and Nucleic acid binding		0.580204		0.0675265		0.0460294		0.0111548			0.691355	0.469052	0.119555	0.0154976	0.00201836	0.0900404	0.0401209	-0.0178114
Q2FW27_C130	Q2FW27	IUESCGTTYHLVFNPPK	adk	Adenylate kinase	yes	Enzyme	Functional site	0.545896				-0.0877072		0.245798			0.616402	0.47539			-0.242089	0.0666748	0.248292	0.243303
Q2FZ54_C161	Q2FZ54	IIEPANINUPGQIVVSGHK	SAOUHSC_01198	Malonyl CoA-acyl carrier protein transacylase	yes	Enzyme		0.764		-0.0689244		-0.0178729		0.0262879			1.0137	0.514306	-0.184921	0.0470726	0.0329569	-0.0687026	0.0204171	0.0321587
Q2FZM7_C207	Q2FZM7	NNLALUVYYLEK	SAOUHSC_00973	Uncharacterized protein	no	not assigned		0.625966						0.0697824			0.731183	0.520749					0.367595	-0.22803
Q2G069_C126	Q2G069	DYALTGLEFAUGIPGSIGGAVYMNAGAYGGEVK	murB	UDP-N-acetylenolpyruvoylglucosamine reductase	yes	Enzyme				0.48228		0.212642							0.288654	0.675906	0.428142	-0.00285937
Q2FX16_C40	Q2FX16	EHGQLTLSNIEFTTTNLUNMR	SAOUHSC_02090	Conserved hypothetical phage protein	no	Enzyme		0.764784						-0.0716637			0.70248	0.827087					-0.203651	0.0603241
Q2FVV6_C147	Q2FVV6	FDDTQHMTLPMLFSDILIYUTER	SAOUHSC_02585	Uncharacterized protein	no	Gene expression and Nucleic acid binding		0.686277									0.740194	0.632361
Q2G1U3_C586	Q2G1U3	NAGVDMTTPEPIEQAUEVFEQK	SAOUHSC_00937	Oligoendopeptidase F	no	Enzyme		0.601873		0.0390855		0.0530615		-0.00783679			0.673376	0.53037	0.0514417	0.0267293	0.0897693	0.0163537	0.00547185	-0.0211454
Q2FWX8_C89	Q2FWX8	AGTGUYVSISEDKR	SAOUHSC_02143	Uncharacterized protein SAOUHSC_02143	no	Enzyme		0.615171						0.0709062			0.740798	0.489543					0.158208	-0.0163953
Q2G0N5_C75	Q2G0N5	YKGMVUDR	rpoC	DNA-directed RNA polymerase subunit beta'	yes	Gene expression and Nucleic acid binding				0.374568		0.294371		0.0115665					0.343578	0.405557	0.233275	0.355467	0.0399806	-0.0168477
Q2G2C1_C98	Q2G2C1	RUAEEGIK	SAOUHSC_01064	Pyruvate carboxylase	no	Enzyme		0.588012		0.0184827		-0.0172083		0.0789661			0.650856	0.525167	0.0742314	-0.0372659	0.00891709	-0.0433337	0.138159	0.0197731
Q2FWE4_C124	Q2FWE4	DPIVVEHITVPUGIDIGQTLIGMHIK	SAOUHSC_02355	UPF0340 protein SAOUHSC_02355	no	not assigned		0.604357		0.0602909				0.00266625			0.754118	0.454597	0.306729	-0.186147			0.120617	-0.115285
Q2FZH5_C504	Q2FZH5	WTGMUGEMAGDETAIPLLLGLGLDEFSMSATSILK	SAOUHSC_01029	Phosphoenolpyruvate-protein phosphotransferase	no	Enzyme	Functional site	0.474354		0.068031		0.122988					0.485587	0.46312	0.103397	0.0326651	0.143655	0.102322
Q2FZU1_C33	Q2FZU1	GYDVVACULDVGEGKDLDIVYK	argG	Argininosuccinate synthase	no	Enzyme				0.714351		-0.05496							0.763582	0.66512	-0.0124026	-0.0975173
Q2FXH0_C40	Q2FXH0	VALDGGFDUPNR	SAOUHSC_01877	Uncharacterized protein	no	Enzyme		0.413565						0.23733			0.717035	0.110096					0.0661395	0.40852
Q2G0A9_C58	Q2G0A9	GITTMDHADIYGDYQUESLFGNALDLSPELR	SAOUHSC_00696	Uncharacterized protein	no	Enzyme		0.909134						-0.2692			1.08223	0.736042					-0.0221559	-0.516244
Q2G078_C716	Q2G078	LLSVEEUTSCSI	SAOUHSC_00742	Ribonucleoside-diphosphate reductase	yes	Enzyme		0.736774						-0.0978834			0.777199	0.69635					-0.166989	-0.0287784
Q2FYH2_C129	Q2FYH2	MADUSLQSGNYSDAIR	SAOUHSC_01480	Uncharacterized protein	no	not assigned		0.554757		-0.0700111		0.0625395		0.0907925			0.635987	0.473527	0.19333	-0.333352	-0.0220973	0.147176	0.293841	-0.112256
Q2FZX3_C77	Q2FZX3	FSNIQDYIFEYUNFGCPYFVLR	SAOUHSC_00862	Uncharacterized protein	no	not assigned				0.899757		-0.0664411		-0.197754					1.0795	0.720016	0.0713508	-0.204233	-0.244771	-0.150737
Q2FVT5_C347	Q2FVT5	PLFUEGK	hutU	Urocanate hydratase	no	not assigned		0.475894		0.12835		0.0311632		-0.00194614			0.536732	0.415055	0.133564	0.123136	0.0400095	0.0223169	0.00677495	-0.0106672
Q2FWG3_C65	Q2FWG3	ELQHLUHQYDVPFIVNDDVSLAK	thiE	Thiamine-phosphate synthase	no	Enzyme				0.755738		-0.0113047		-0.11523					0.93191	0.579566	-0.0423825	0.0197731	-0.131629	-0.09883
Q2FZ53_C118	Q2FZ53	GVFNUIQK	SAOUHSC_01199	3-oxoacyl-(Acyl-carrier-protein) reductase, putative	yes	Enzyme		0.505693		-0.0136455		-0.0250189		0.155683			0.586741	0.424644	0.0339339	-0.0612249	-0.0218923	-0.0281456	0.127033	0.184334
Q2FWL1_C88	Q2FWL1	YGINYASHTUDVMSLEVR	SAOUHSC_02278	Ribosomal-protein-alanine acetyltransferase	no	Enzyme								0.620847									0.712023	0.529671
Q2FY68_C100	Q2FY68	QQLEUQNPVAR	proC	Pyrroline-5-carboxylate reductase	no	Enzyme		0.654766		0.00201818		-0.0689276		0.0307516			0.783163	0.526369	0.00129784	0.00273852	0.0017302	-0.139585	0.115566	-0.0540627
Q2G124_C88	Q2G124	VUGSGLK	SAOUHSC_00336	Probable acetyl-CoA acyltransferase	yes	Enzyme	Functional site	0.461925		0.0597657		-0.022614		0.119461			0.581978	0.341872	0.102322	0.0172093	0.0740944	-0.119322	0.226139	0.0127832
Q2G126_C92	Q2G126	HQQGQTDFETFUDEMAEAGIYK	SAOUHSC_00330	Uncharacterized protein	no	not assigned		0.738019		0.0696329		-0.165025		-0.0251724			0.857424	0.618615	0.271306	-0.13204	-0.193338	-0.136712	0.166458	-0.216803
Q2G0R1_C37	Q2G0R1	DYQGKPLVUVGILK	SAOUHSC_00485	Hypoxanthine phosphoribosyltransferase	no	Enzyme		0.380524		0.76532		0.16348		-0.692361			0.518233	0.242816	0.762817	0.767824	0.0769695	0.249991	-0.620889	-0.763832
Q2FYF3_C287	Q2FYF3	ETYETNIENUYIAGVIAAGNDANTIFIENGK	SAOUHSC_01499	Uncharacterized protein	no	Enzyme		0.63467						-0.0184467			0.872632	0.396708					0.14509	-0.181984
Q2FXH0_C52	Q2FXH0	DGTVAHGGUTFCSAAGSGDFAGNR	SAOUHSC_01877	Uncharacterized protein	no	Enzyme				0.0186538		0.215227		0.381548					-0.177066	0.214374	0.164658	0.265797	0.654069	0.109026
Q2FXW5_C183	Q2FXW5	VDIEIEAFIHGAMUIAYSGR	SAOUHSC_01716	Uncharacterized protein	no	Enzyme								0.613664									0.587077	0.640251
Q2FXV7_C104	Q2FXV7	LYQQALQTEIEQVDUNYMIGMAFNQLESFK	SAOUHSC_01724	Uncharacterized protein	no	not assigned		0.606332									0.705757	0.506907
P95689_C323	P95689	VILUTGDIGFSASK	serS	Serine--tRNA ligase	yes	Gene expression and Nucleic acid binding		0.535216		0.297063		-0.0645583		-0.161764			0.60065	0.469782	0.302101	0.292025	-0.0331266	-0.09599	-0.0989842	-0.224544
Q2FY50_C489	Q2FY50	DIAEYIQVIUISHLPQVASMSDHHLLISK	SAOUHSC_01615	DNA repair protein RecN	no	not assigned								0.600809									0.661294	0.540325
Q2G2U9_C9	Q2G2U9	INDUFELLSMVTYADK	sarA	Transcriptional regulator SarA	yes	Gene expression and Nucleic acid binding	Functional site	0.479641		-0.0935257		0.0737445		0.139832			0.582715	0.376568	-0.0778761	-0.109175	0.102233	0.0452559	0.161436	0.118227
Q2G0S3_C379	Q2G0S3	TNIGUGTITVNYDGENK	glmU	Bifunctional protein GlmU	yes	Enzyme	Functional site	0.854488		0.0912137		-0.268123		-0.0835304			0.960816	0.748161	0.138218	0.0442098	-0.286806	-0.249439	-0.0565369	-0.110524
Q2G2J8_C57	Q2G2J8	LAETLSEVVDTPMHQVNUSVDLDTESLLGFK	SAOUHSC_01413	Uncharacterized protein SAOUHSC_01413	no	not assigned		0.909566				-0.0147817		-0.301233			0.916094	0.903038			0.166201	-0.195765	-0.549092	-0.0533739
Q2FVA5_C185	Q2FVA5	THDLDAAYQUYIEQLGFQHVSDFPR	SAOUHSC_02828	Uncharacterized protein	no	not assigned				0.236358		0.264078		0.0925444					-0.0538531	0.52657	0.139469	0.388686	0.0945063	0.0905825
Q2FWX8_C339	Q2FWX8	VASEGVUVIF	SAOUHSC_02143	Uncharacterized protein SAOUHSC_02143	no	Enzyme		0.781447		-0.0452041		-0.144266		0.000273887			0.943059	0.619836	0.00690837	-0.0973167	-0.126911	-0.161621	0.119024	-0.118476
Q2FYZ0_C64	Q2FYZ0	DQGFVILGFPUNQFGGQEPGSGEEAAQNCK	SAOUHSC_01282	Glutathione peroxidase	no	Enzyme		0.493264		0.0121126		0.0533209		0.033105			0.602262	0.384266	0.0654344	-0.0412093	0.0777899	0.028852	0.0939752	-0.0277652
Q2FY08_C137	Q2FY08	IIDDEGIVUPVSK	glyQS	Glycine--tRNA ligase	yes	Modulator/Scaffolding/Adaptor		0.683683		-0.08036		-0.0721437		0.0566367			0.846242	0.521124	-0.0425716	-0.118149	-0.0600632	-0.0842242	0.12984	-0.0165665
Q2G200_C17	Q2G200	IKDDILYUYTEDSIK	SAOUHSC_00941	UPF0738 protein SAOUHSC_00941	no	not assigned		0.519024						0.0686491			0.853197	0.184852					0.10675	0.030548
Q2G2P7_C503	Q2G2P7	QSIYQTTAUH	hutH	Histidine ammonia-lyase	no	Enzyme		0.839208		-0.383954				0.13058			0.70044	0.977976	-0.385771	-0.382137			0.109561	0.151599
P0A011_C107	P0A011	LPDULVEWSAK	lacD	Tagatose 1,6-diphosphate aldolase	no	Enzyme		0.740853		0.0824316		-0.221513		-0.0212108			0.82489	0.656817	0.0756632	0.0892	-0.0838845	-0.359141	-0.120075	0.0776532
Q2G1U3_C425	Q2G1U3	FQPSNSSDYTIFVAEVASTUNEALLSDYMDK	SAOUHSC_00937	Oligoendopeptidase F	no	Enzyme		0.558399		0.0298505				-0.0125476			0.646808	0.46999	0.0858325	-0.0261316			0.0107798	-0.035875
Q2G0N7_C69	Q2G0N7	IADVGUGYGPIGLMIAK	SAOUHSC_00523	Uncharacterized protein	no	not assigned		0.651745		-0.056277		-0.0582602		0.0325475			0.752492	0.550999	-0.134034	0.0214797	-0.10897	-0.00755059	0.0017302	0.0633649
Q2G2S0_C411	Q2G2S0	ELIEQDESITSVLTKEELDEUFDPK	purB	Adenylosuccinate lyase	no	Enzyme		0.496853						0.0727676			0.622649	0.371057					0.108223	0.0373119
Q2G030_C128	Q2G030	HGMTPIIUVGETDEERESGK	tpiA	Triosephosphate isomerase	yes	Enzyme		0.540804		-0.0872378		-0.0874108		0.203015			0.387457	0.694151	-0.027575	-0.146901	0.250234	-0.425056	0.073409	0.332622
Q2FWE5_C339	Q2FWE5	EAEETLDSVGITUNK	glyA	Serine hydroxymethyltransferase	no	Enzyme		0.703278						-0.135147			0.898634	0.507921					0.0854247	-0.355719
Q2G2Q0_C756	Q2G2Q0	NGNVVUITTVTGEEDLMIVTNAGVIIR	gyrA	DNA gyrase subunit A	yes	Gene expression and Nucleic acid binding								0.565254									0.429536	0.700972
Q2FXE2_C28	Q2FXE2	VENDENUMESVK	SAOUHSC_01907	Uncharacterized protein	no	Enzyme		0.669241		-0.0580996		-0.175229		0.124367			0.748719	0.589763	-0.137537	0.0213376	-0.160218	-0.19024	0.351741	-0.103007
Q2FZW2_C51	Q2FZW2	LQLHGACGTUPSSTITLK	SAOUHSC_00873	Uncharacterized protein	no	not assigned		0.1105		0.176222		0.305222		-0.0322336			0.14965	0.0713508	0.201885	0.15056	0.363003	0.247441	0.102457	-0.166924
Q2FZ67_C325	Q2FZ67	ILVDAPUSGLGVMR	SAOUHSC_01184	16S rRNA (cytosine(967)-C(5))-methyltransferase	no	Gene expression and Nucleic acid binding	Functional site	0.443245		-0.121128		0.101716		0.133464			0.595122	0.291368	0.0526941	-0.294951	0.0738202	0.129613	0.0405418	0.226385
Q2FX98_C54	Q2FX98	VLPNWTTUISICALFR	SAOUHSC_01979	Uncharacterized protein	yes	Gene expression and Nucleic acid binding		0.376305						0.173172			0.722204	0.0304067					0.188654	0.157691
Q2G038_C196	Q2G038	EADLIVLGPGSLYTSVISNLUVNGISDALIHSDAPK	SAOUHSC_00788	Gluconeogenesis factor	yes	not assigned								0.546357									0.550704	0.54201
Q2FY73_C100	Q2FY73	HFHHHLVUMECGR	SAOUHSC_01592	Transcriptional regulator, Fur, putative	yes	Gene expression and Nucleic acid binding		0.462148						0.0796894			0.480265	0.444031					-0.136109	0.295488
Q2G1Y6_C408	Q2G1Y6	VQUEVPQENAGAVIESLGAR	SAOUHSC_01058	GTP-binding protein TypA, putative	no	not assigned		0.714416		-0.100082		-0.147325		0.0741037			0.836005	0.592828	-0.0422339	-0.15793	-0.150529	-0.144122	0.115965	0.0322419
Q2FYN4_C66	Q2FYN4	AFTUIQMVK	lysA	Diaminopimelate decarboxylase	no	Enzyme		0.627529		-0.0707319		-0.00915033		-0.00760219			0.732399	0.522658	0.0274372	-0.168901	0.175301	-0.193602	0.0794293	-0.0946337
Q2G1U6_C13	Q2G1U6	MVTLFTSPSCTSUR	spxA	Regulatory protein Spx	yes	not assigned								0.536847									0.626486	0.447209
Q2FVA6_C75	Q2FVA6	IIASUSFAK	SAOUHSC_02827	Uncharacterized protein	no	not assigned		0.512915		-0.0592623		0.0341475		0.0484738			0.616358	0.409472	-0.0437798	-0.0747449	0.0746424	-0.00634737	0.101919	-0.00497143
Q2FWF5_C134	Q2FWF5	ATVDGQLAUSCELTFAIQDVK	fabZ	3-hydroxyacyl-[acyl-carrier-protein] dehydratase FabZ	yes	Enzyme								0.534567									0.572211	0.496922
Q2FWD9_C145	Q2FWD9	LQAVUAVCGSSSSR	tdk	Thymidine kinase	no	Enzyme	Functional site	0.426332		0.908361		0.00483806		-0.80538			0.453439	0.399226	0.97475	0.841973	0.0569996	-0.0473235	-0.664928	-0.945832
Q2G081_C57	Q2G081	FNCPEFTSLUPITGQPDFATIYISYIPNVK	queF	NADPH-dependent 7-cyano-7-deazaguanine reductase	no	Enzyme	Functional site	0.550268		-0.259762		0.242794					0.797428	0.303109	-0.371236	-0.148289	0.506703	-0.0211161
Q2FUV4_C147	Q2FUV4	NEGVSESUHGGIK	SAOUHSC_02997	Uncharacterized protein	no	Enzyme								0.532113									0.519542	0.544683
Q2FUY1_C169	Q2FUY1	LICHLUQTVGYDQDEFYEIK	arcR	HTH-type transcriptional regulator ArcR	no	Gene expression and Nucleic acid binding						0.529286									0.768502	0.29007
Q2FW29_C11	Q2FW29	PSVKPIUEK	rpmJ	50S ribosomal protein L36	yes	Modulator/Scaffolding/Adaptor		0.225999		0.0522188		0.124003		0.12392			0.321483	0.130515	0.0831975	0.0212401	0.136862	0.111143	0.160599	0.087241
Q2FW27_C150	Q2FW27	ICESCGTTYHLVFNPPKVEGIUDIDGGK	adk	Adenylate kinase	yes	Enzyme	Functional site	0.140222				0.199522		0.184018			0.161952	0.118493			-0.0859713	0.485015	0.164271	0.203765
Q2FV28_C209	Q2FV28	QUYCGCVFAAMQQGIDFK	queH	Epoxyqueuosine reductase QueH	no	Enzyme		0.508342						0.0147582			0.652785	0.3639					0.102591	-0.0730745
Q2FZ04_C19	Q2FZ04	NNVKPNWCPGUGDFSVQAAIQK	SAOUHSC_01267	Uncharacterized protein	no	Enzyme		0.4186						0.0955617			0.529771	0.307429					0.0528332	0.13829
Q2FY19_C94	Q2FY19	IACTNHHHHHFIUEK	fur	Ferric uptake regulation protein	no	Gene expression and Nucleic acid binding	Functional site			0.513373									0.520246	0.5065
Q2FWY1_C110	Q2FWY1	IANFETAGPLUYR	ppaC	Probable manganese-dependent inorganic pyrophosphatase	yes	Enzyme		0.788187		-0.157762		-0.136252		0.0180639			0.868055	0.70832	-0.0918635	-0.22366	-0.134921	-0.137584	0.0478175	-0.0116898
Q2FYZ0_C36	Q2FYZ0	GDVMLIVNTASEUGFTSQFEGLQSLYEK	SAOUHSC_01282	Glutathione peroxidase	no	Enzyme	Functional site	0.576292		-0.0488195		-0.152316		0.136281			0.803547	0.349037	-0.105268	0.00762945	-0.0260053	-0.278627	0.186004	0.0865574
Q2G094_C30	Q2G094	GYEHDGVIPUGALDTLAHEIANR	SAOUHSC_00727	Uncharacterized protein	no	not assigned		0.740266						-0.229491			0.842134	0.638398					-0.160008	-0.298974
Q2FYI6_C8	Q2FYI6	MFQLLAVUPMGLEAVVAR	SAOUHSC_01460	Uncharacterized protein	no	Gene expression and Nucleic acid binding		0.476057		-0.159535		-0.0133616		0.201865			0.587653	0.36446	-0.10493	-0.21414	0.0342157	-0.060939	0.289362	0.114367
Q2G1K2_C26	Q2G1K2	AUDQYFNQILVHTGQNYDYTLNQIFFDDLELR	SAOUHSC_00120	UDP-N-acetylglucosamine 2-epimerase	no	Enzyme				0.50262									0.488721	0.516519
Q2FZC7_C174	Q2FZC7	CMTUGVCLEVCPNVTENNK	SAOUHSC_01105	Iron-sulphur subunit of succinate dehydrogenase, putative	no	not assigned		0.400173						0.0951905			0.367707	0.432639					0.0821576	0.108223
Q2FWR2_C34	Q2FWR2	EISNGHUNYWK	SAOUHSC_02218	Conserved hypothetical phage protein	no	not assigned		0.207425		0.314534		0.0273876		-0.0544553			0.300337	0.114512	0.397792	0.231276	0.0336431	0.021132	-0.0350859	-0.0738246
Q2G229_C46	Q2G229	AGNTTFLUGVNDDRVDEILSVINQTCGNR	SAOUHSC_00452	Uncharacterized protein	no	not assigned		0.792133		-0.2214		-0.150561		0.0726785			0.939302	0.644964	-0.192892	-0.249908	-0.0897586	-0.211364	0.203514	-0.0581575
Q2FXQ4_C197	Q2FXQ4	FANUTQELTIEK	SAOUHSC_01781	Uncharacterized protein	no	not assigned				0.491113									0.460271	0.521955
Q2FWB7_C76	Q2FWB7	ILAVGGNPVGTLTEULEQSIVK	SAOUHSC_02381	Uncharacterized protein	no	Enzyme		0.51892		-0.0453476		-0.0442759		0.0605121			0.609377	0.428464	0.021764	-0.112459	-0.0253385	-0.0632132	0.105812	0.0152121
Q2FZ71_C155	Q2FZ71	LANAAGLDGVVUSPLESR	pyrF	Orotidine 5'-phosphate decarboxylase	no	Enzyme				0.271173		0.218153							0.318924	0.223423	0.302875	0.133432
Q2FZ37_C193	Q2FZ37	DUSIVEINPLVTTADGDVLALDAK	sucC	Succinate--CoA ligase [ADP-forming] subunit beta	yes	Enzyme		0.960863		-0.809587		0.0731021		0.263141			1.01892	0.902807	-0.724826	-0.894349	-0.248639	0.394843	0.311038	0.215244
Q2G032_C96	Q2G032	DLNIDVVLEUTGFYTDKDK	SAOUHSC_00795	Glyceraldehyde-3-phosphate dehydrogenase	yes	Enzyme		-0.0240454		0.0676848		0.309642		0.134218			0.0623829	-0.110474	0.108357	0.0270125	0.285324	0.33396	0.0950085	0.173428
Q2G2Q3_C49	Q2G2Q3	IGHTGTLDPEVAGVLPVUIGNATR	truB	tRNA pseudouridine synthase B	no	Gene expression and Nucleic acid binding		0.828265		-0.201695		-0.127276		-0.0154793			0.902498	0.754032	-0.227355	-0.176035	-0.104954	-0.149598	0.0113001	-0.0422587
Q2FXM3_C82	Q2FXM3	TYQDALVIVUDTANAPR	SAOUHSC_01812	Uncharacterized protein	no	Gene expression and Nucleic acid binding		0.480897									0.724476	0.237319
Q2FYU7_C368	Q2FYU7	GVGIENIUPFSR	katA	Catalase	no	Enzyme		0.479756		0.0612764		-0.0565306		-0.00396051			0.5889	0.370611	0.0965317	0.026021	-0.0758545	-0.0372067	0.032383	-0.040304
Q2FVY0_C310	Q2FVY0	YLFGLSGNPSAUFTGFELFVKPAVK	SAOUHSC_02542	Molybdopterin biosynthesis protein moeA, putative	no	not assigned		0.47769		0.0202704		-0.0315418		0.010943			0.595408	0.359971	0.0216219	0.018919	0.0764223	-0.139506	0.0768327	-0.0549467
Q2G1S2_C242	Q2G1S2	GLSYEEVUEQTTK	SAOUHSC_00462	Uncharacterized protein	no	Gene expression and Nucleic acid binding		0.37435		0.0565084		0.130644		-0.0861093			0.426426	0.322274	0.0524159	0.0606008	0.345851	-0.0845632	-0.266455	0.0942361
Q2FY14_C164	Q2FY14	LSENGLAQEGNYEYUFFESEGR	SAOUHSC_01660	GTP cyclohydrolase 1 type 2 homolog	no	not assigned								0.471929									0.442545	0.501312
Q2G1F0_C228	Q2G1F0	EIYDAPNUIFVAQFIGSPAMNMLNATVEMDGLK	SAOUHSC_00175	Multiple sugar-binding transport ATP-binding protein, putative	no	not assigned						0.4696									0.731183	0.208018
Q2FY13_C92	Q2FY13	LGDGLSVIQPEDVIDNITIUGMGGPLIAK	SAOUHSC_01661	Uncharacterized protein	yes	Gene expression and Nucleic acid binding		0.421674		0.112481		0.0453804		-0.110151			0.550802	0.292546	0.105008	0.119954	0.0877344	0.00302648	-0.0323149	-0.187987
Q2FYY9_C330	Q2FYY9	DLUDHASNRPASDLPNVFVSSK	hflX	GTPase HflX	no	Modulator/Scaffolding/Adaptor				0.452884				0.00807828					0.691891	0.213876			0.162081	-0.145925
Q2FY08_C344	Q2FY08	VTLAFLUDAYDEEGVEGSK	glyQS	Glycine--tRNA ligase	yes	Modulator/Scaffolding/Adaptor		0.576506		-0.0195485		-0.137747		0.0396092			0.684204	0.468808	0.00731461	-0.0464117	-0.0861536	-0.189341	0.0689406	0.0102778
Q2FXR8_C317	Q2FXR8	AGKYEGMDRFDUR	valS	Valine--tRNA ligase	yes	Gene expression and Nucleic acid binding				0.391991		0.0107926		0.0553572					0.553164	0.230818	0.22848	-0.206895	0.214125	-0.10341
Q2FYS9_C314	Q2FYS9	ATIANMAPEYGATUGFFPVDDESLK	SAOUHSC_01347	Aconitate hydratase	no	Enzyme		0.457425		-0.0406483		-0.0111556		0.0512196			0.542902	0.371949	0.0137838	-0.0950805	0.0275787	-0.04989	0.0574156	0.0450235
O05204_C127	O05204	LEGSFHFETFISLTUQK	ahpF	Alkyl hydroperoxide reductase subunit F	no	Enzyme		0.213156		0.24175		0.096211		-0.0978426			0.328836	0.097476	0.289731	0.193768	0.144046	0.0483757	-0.0683169	-0.127368
Q2G0R8_C378	Q2G0R8	FSUKPVQQFYGQYDIMR	mfd	Transcription-repair-coupling factor	no	Gene expression and Nucleic acid binding								0.449255									0.563256	0.335255
Q2FYP2_C219	Q2FYP2	HFLNNVUTHIADLDFGK	SAOUHSC_01392	ABC transporter, ATP-binding protein, putative	no	not assigned				0.448746									0.517427	0.380064
Q2G297_C53	Q2G297	LAEIYDGDTSKVELAGVLHDFUKYDDLGK	SAOUHSC_01696	Uncharacterized protein	no	not assigned				0.349313		0.0972066							0.45386	0.244765	0.321466	-0.127053
Q2FY66_C10	Q2FY66	HIPULITIFGATGDLSHR	zwf	Glucose-6-phosphate 1-dehydrogenase	yes	Enzyme		0.400009		-0.0859329		-0.0320696		0.155757			0.569199	0.230818	-0.0759931	-0.0958726	0.0539373	-0.118077	0.111528	0.199986
Q2FVQ0_C188	Q2FVQ0	KPLASSTWQAUVDPVGGEGINYVTK	SAOUHSC_02652	Uncharacterized protein	no	Enzyme								0.431328			2.09643						0.477239	0.385416
Q2FWD9_C148	Q2FWD9	LQAVCAVUGSSSSR	tdk	Thymidine kinase	no	Enzyme	Functional site	0.24807		0.995323				-0.812644			0.366924	0.129217	0.988267	1.00238			-0.713403	-0.911886
Q2FYY6_C96	Q2FYY6	LIUDVYK	SAOUHSC_01287	Glutamine synthetase	yes	Enzyme		0.351721		-0.0400343		0.153352		-0.0363929			0.147833	0.555609	0.050983	-0.131051	0.290778	0.0159257	-0.0548868	-0.017899
Q2FXF5_C10	Q2FXF5	TIYFIUTGNSCR	arsC	Arsenate reductase	no	Enzyme	Functional site	0.421765									0.552869	0.29066
Q2FZM1_C45	Q2FZM1	SUVDATYR	SAOUHSC_00979	Uncharacterized protein	no	not assigned		0.435973		0.127791		-0.20773		0.0638755			0.548634	0.323312	0.188907	0.0666748	-0.104651	-0.310808	0.133432	-0.00568096
Q2FYI3_C81	Q2FYI3	KFELLIANIEQLSVEUHFKR	SAOUHSC_01464	Uncharacterized protein	no	not assigned						0.419041									0.612683	0.225398
Q2G089_C246	Q2G089	QFMGSHLEDDAPUVEENAIIR	SAOUHSC_00731	ABC transporter domain protein	no	not assigned		0.659804						-0.250616			0.72334	0.596267					-0.195319	-0.305913
Q2FZ29_C169	Q2FZ29	VAADIUVFTNDNIVVETL	hslV	ATP-dependent protease subunit HslV	no	Enzyme	Functional site	0.65782		-0.0862956		-0.294201		0.13059			0.810155	0.505484	-0.130729	-0.0418626	-0.0621585	-0.526244	0.203765	0.0574156
Q2G1S3_C179	Q2G1S3	GMFNETUPSFDDIFEEYYAAGQR	purA	Adenylosuccinate synthetase	no	Enzyme		0.587479		0.270432		-0.248625		-0.201488			0.735176	0.439783	0.249142	0.291721	-0.241066	-0.256183	-0.0928478	-0.310128
Q2G2T8_C139	Q2G2T8	AIGVUNFNVHHLEK	SAOUHSC_00712	Uncharacterized protein	no	Enzyme		0.435355		0.162071		-0.135729		-0.0610568			0.551787	0.318924	0.167486	0.156655	-0.084655	-0.186804	-0.0262932	-0.0958204
Q2G223_C112	Q2G223	TEUWYILDAAPGAEIIYGVHAHNK	SAOUHSC_02976	Mannose-6-phosphate isomerase, class I	no	Enzyme	Functional site	0.127026						0.272042			0.133169	0.120883					-0.0163369	0.560421
Q2FVM2_C225	Q2FVM2	IEAGMPTVCSETUTGR	SAOUHSC_02680	Nitrate reductase, beta subunit	no	Enzyme		0.398804									0.50518	0.292428
Q2FX98_C58	Q2FX98	VLPNWTTCISIUALFR	SAOUHSC_01979	Uncharacterized protein	yes	Gene expression and Nucleic acid binding		0.415465		-0.0619658		0.0420136					0.287236	0.543694	-0.111165	-0.0127665	0.0102069	0.0738202
Q2FZX4_C46	Q2FZX4	NLNTVCEEAKUPNIHECWGAR	lipA	Lipoyl synthase	no	Enzyme	Functional site	0.542674		-0.326758				0.174895			0.718045	0.367304	-0.124236	-0.529281			0.131194	0.218595
Q2FZY5_C371	Q2FZY5	AGHHUAQPLMK	SAOUHSC_00849	Cysteine desulfurase	yes	Enzyme		0.252201		0.0368531		-0.020837		0.118491			0.348006	0.156397	0.0926134	-0.0189072	0.0543623	-0.0960362	0.090718	0.146264
P72360_C30	P72360	SVGIDFUCGGQVSIEAAALEK	scdA	Iron-sulfur cluster repair protein ScdA	no	not assigned		0.447046						-0.0613197			0.510152	0.383939					-0.021614	-0.101026
Q2FZC7_C80	Q2FZC7	TTPVVWDMNULEEVCGACSMVINGR	SAOUHSC_01105	Iron-sulphur subunit of succinate dehydrogenase, putative	no	not assigned		0.366644						0.0186322			0.527771	0.205518					-0.0507415	0.0880059
Q2G1G2_C219	Q2G1G2	INTLQSFAESFMRPUQLAK	SAOUHSC_00162	Type I restriction enzyme R Protein	no	Gene expression and Nucleic acid binding		0.654394						-0.27006			0.565402	0.743386					-0.121094	-0.419025
Q2FZW2_C48	Q2FZW2	LQLHGAUGTCPSSTITLK	SAOUHSC_00873	Uncharacterized protein	no	not assigned		-0.189474		0.2643		0.378244		-0.0693367			-0.0276897	-0.351258	0.332622	0.195977	0.439995	0.316493	0.0411028	-0.179776
Q2FXV6_C352	Q2FXV6	AITPGQAVVFYQGDVULGGATIDDVFK	mnmA	tRNA-specific 2-thiouridylase MnmA	yes	Enzyme		0.450375		-0.0342887		-0.0534605		0.0199946			0.544353	0.356396	0.0413157	-0.109893	-0.016118	-0.0908029	0.120922	-0.0809325
Q2FZI5_C230	Q2FZI5	AFDHDEGPNTGGMGAYUPVPHISDDVLK	purD	Phosphoribosylamine--glycine ligase	no	Enzyme		0.382424									0.578601	0.186247
Q2FZ19_C153	Q2FZ19	NVNISFFNTTHSIPDSLGVUIHTSYGAIVYTGEFK	rnj2	Ribonuclease J 2	yes	Gene expression and Nucleic acid binding				0.378686									-0.0233578	0.78073
Q2FXH0_C55	Q2FXH0	DGTVAHGGCTFUSAAGSGDFAGNR	SAOUHSC_01877	Uncharacterized protein	no	Enzyme		0.215147		0.159145							0.246712	0.183582	0.038998	0.279293
O05154_C10	O05154	FTIIIPTUNNEATIR	tagX	Putative glycosyltransferase TagX	no	Enzyme		0.400237						-0.0270913			0.464877	0.335598					0.0104934	-0.064676
Q2FY08_C328	Q2FY08	YIPYUIEPSLGADR	glyQS	Glycine--tRNA ligase	yes	Modulator/Scaffolding/Adaptor		0.503835		-0.108129		-0.133376		0.096179			0.654929	0.352741	-0.0813543	-0.134905	-0.0739095	-0.192843	0.155749	0.0366088
Q2FX49_C21	Q2FX49	KLEDELUDYPNYHK	SAOUHSC_02051	Int gene activator RinA	no	not assigned		0.710019						-0.355879			0.956205	0.463832					-0.185556	-0.526203
Q2FZD2_C32	Q2FZD2	VESGVQLVDFWATWCGPUK	trxA	Thioredoxin	yes	Enzyme		0.190697		0.585696				-0.425804			0.25677	0.124623	1.31417	-0.142783			-0.334596	-0.517013
Q2G157_C199	Q2G157	VMDLGVHUSVVGGAITRPK	nanE	Putative N-acetylmannosamine-6-phosphate 2-epimerase	no	Enzyme		0.553095		0.368215		-0.369562		-0.202578			0.613074	0.493116	0.348837	0.387593	-0.339088	-0.400036	-0.163779	-0.241377
Q2G1N2_C178	Q2G1N2	VFVYDQFSEAUAR	SAOUHSC_00076	Ornithine cyclodeaminase, putative	no	Enzyme						0.339778									0.457121	0.222434
Q2G2V3_C426	Q2G2V3	QFPGISDAVUVGHPDDTWGQVPK	menE	2-succinylbenzoate--CoA ligase	no	Enzyme		0.335855									0.193204	0.478506
Q2FYS0_C115	Q2FYS0	TDAGQIYTGTIULHETSVHVYR	SAOUHSC_01365	Uncharacterized protein	no	Enzyme								0.334817									0.153416	0.516217
Q2G1D8_C654	Q2G1D8	IPYDCUK	pflB	Formate acetyltransferase	no	Enzyme		-0.012307				0.159687		0.186324			0.0742314	-0.0988454			0.155361	0.164014	0.246469	0.12618
Q2FZ02_C223	Q2FZ02	AWVNIMYGUDK	miaB	tRNA-2-methylthio-N(6)-dimethylallyladenosine synthase	no	not assigned	Functional site							0.318524									0.275841	0.361207
Q2G1G7_C224	Q2G1G7	QLIDFUK	SAOUHSC_00156	Uncharacterized protein	no	Enzyme		0.658962		0.239302		-0.375629		-0.22258			0.684819	0.633106	0.461109	0.0174944	-0.420356	-0.330901	-0.143484	-0.301675
Q2FXD1_C358	Q2FXD1	IPULTEQDKVSALLK	SAOUHSC_01932	Type I restriction-modification enzyme, S subunit, EcoA family, putative	no	Gene expression and Nucleic acid binding				0.0223802		0.156524		0.120941					0.131589	-0.0868291	0.142609	0.170438	0.25411	-0.012228
Q2G1D8_C413	Q2G1D8	ESYGDDYGIAUCVSAMTIGK	pflB	Formate acetyltransferase	no	Enzyme	Functional site	0.393099		-0.226648		-0.0745269		0.20656			0.491913	0.294284	-0.250453	-0.202842	-0.00903245	-0.140021	0.219849	0.19327
Q2G2P8_C50	Q2G2P8	AUVFSGSGLITVATHPTNHSALHSR	nnrD	ADP-dependent (S)-NAD(P)H-hydrate dehydratase	no	Enzyme								0.295808									0.228726	0.362891
Q2G1K2_C123	Q2G1K2	LKIPVFHMEAGNRUFDQNVPEEINRK	SAOUHSC_00120	UDP-N-acetylglucosamine 2-epimerase	no	Enzyme								0.29421									0.524365	0.0640551
Q2FYZ0_C82	Q2FYZ0	YKDQGFVILGFPCNQFGGQEPGSGEEAAQNUK	SAOUHSC_01282	Glutathione peroxidase	no	Enzyme		0.377656		-0.132074				0.0426637			0.235972	0.519341	-0.275786	0.0116388			0.130536	-0.0452081
Q2FYK5_C216	Q2FYK5	LSUQLYQR	thyA	Thymidylate synthase	yes	Enzyme	Functional site	0.325796		0.0577602		-0.0635377		-0.0328653			0.490673	0.16092	0.0924781	0.0230424	-0.043185	-0.0838903	0.00590296	-0.0716335
Q2FVJ7_C65	Q2FVJ7	SGICPENUGYCGQSR	bioB	Biotin synthase	no	Enzyme	Functional site	0.28248						0.00179382			0.363451	0.201508					0.0753273	-0.0717396
Q2FXG1_C254	Q2FXG1	LHSAULTGDIFHSQR	ribBA	Riboflavin biosynthesis protein RibBA	no	Enzyme	Functional site							0.279918									0.715981	-0.156145
Q2FWX5_C183	Q2FWX5	LILENUR	SAOUHSC_02146	Uncharacterized protein	no	not assigned		0.493601		-0.248989		-0.241366		0.273676			0.615699	0.371503	-0.160621	-0.337357	-0.198643	-0.284089	0.319734	0.227618
Q2FYS9_C509	Q2FYS9	DAGLQPYLDDLGFNLVGYGUTTCIGNSGPLLPEIEK	SAOUHSC_01347	Aconitate hydratase	no	Enzyme		0.0792294		-0.0246066		0.183795		0.0367086			0.20389	-0.0454314	-0.0495017	0.00028851	0.209641	0.157949	0.0821576	-0.0087403
Q2G0S2_C84	Q2G0S2	GCDVFIIQPTSYPVNLHLMELLIMIDAUK	prs	Ribose-phosphate pyrophosphokinase	yes	Enzyme				0.268373									0.41199	0.124757
Q2FVV6_C29	Q2FVV6	YUNVSKR	SAOUHSC_02585	Uncharacterized protein	no	Gene expression and Nucleic acid binding	Functional site	0.330501		0.15089		-0.156726		-0.0564699			0.428464	0.232538	0.189413	0.112367	-0.270713	-0.0427391	0.0254541	-0.138394
Q2FY66_C430	Q2FY66	MNTVDAYENLLFDULK	zwf	Glucose-6-phosphate 1-dehydrogenase	yes	Enzyme		0.391565		-0.225693		0.0378449		0.0569426			0.497283	0.285847	-0.139904	-0.311482	0.14496	-0.0692702	0.0880059	0.0258793
Q2G234_C354	Q2G234	ESNANQUPFHH	SAOUHSC_02134	Nitric oxide synthase oxygenase	no	Enzyme		0.549914		0.0914035		-0.22567		-0.155689			0.605389	0.494439	0.213485	-0.0306782	-0.242545	-0.208796	-0.163549	-0.147829
Q2G0K8_C30	Q2G0K8	EMAFNQHUK	nagB	Glucosamine-6-phosphate deaminase	no	Enzyme		0.446146		-0.0130925		-0.158474		-0.0158856			0.487281	0.405012	-0.00900159	-0.0171834	-0.0873961	-0.229551	0.0777899	-0.109561
Q2FY33_C223	Q2FY33	IWDGLLEYNVMPUGLGAR	gcvT	Aminomethyltransferase	no	Enzyme		0.37265		-0.214244		-0.102213		0.201344			0.38084	0.36446	-0.161669	-0.266819	-0.0512048	-0.153222	0.252779	0.14991
Q2FXT5_C119	Q2FXT5	IIAEUIK	queA	S-adenosylmethionine:tRNA ribosyltransferase-isomerase	no	Gene expression and Nucleic acid binding								0.256962									0.268794	0.245131
Q2G2A1_C69	Q2G2A1	TIHAEMNALLQUAK	SAOUHSC_01692	Uncharacterized protein	no	Enzyme		0.22946						0.0223495			0.330099	0.128821					0.131589	-0.0868904
Q2FY04_C92	Q2FY04	ASLVSAISQGYRPGDFESITVTVDADKPSSPCGAUR	SAOUHSC_01670	Cytidine deaminase	no	Enzyme		0.303933				-0.0397053		-0.0166736			0.4959	0.111966			-0.396251	0.316841	-0.00733307	-0.0260141
Q2FV76_C231	Q2FV76	SLADFASLUFHVPFTK	SAOUHSC_02860	HMG-CoA synthase, putative	yes	Enzyme		0.208599		0.0344082		-0.0207144		0.0215669			0.292075	0.125122	0.133432	-0.0646157	0.0154976	-0.0569264	0.0504669	-0.00733307
Q2G2T1_C270	Q2G2T1	EAEILUYIDNIDAR	SAOUHSC_01973	Uncharacterized protein	no	Gene expression and Nucleic acid binding						0.243056									0.305329	0.180784
Q2FYQ2_C361	Q2FYQ2	DTGAFUASPYFTHSYVFISWTGK	SAOUHSC_01383	Uncharacterized protein	no	Enzyme		0.242349									0.320427	0.164271
Q2FWX8_C304	Q2FWX8	DFNIASSDDLLVUAHEQGDSVVTVFER	SAOUHSC_02143	Uncharacterized protein SAOUHSC_02143	no	Enzyme		0.242306									0.317767	0.166844
Q2G1D7_C103	Q2G1D7	ENGVHTULDTSAGCANDTK	pflA	Pyruvate formate-lyase-activating enzyme	no	Enzyme		0.456822		-0.26715				0.0498178			0.489518	0.424126	-0.0124754	-0.521825			0.130207	-0.0305712
Q2FXI8_C126	Q2FXI8	LSVLNVNVGNDTLQIVUGAPNVEAGQK	SAOUHSC_01858	Phenylalanine--tRNA ligase beta subunit	no	Gene expression and Nucleic acid binding		0.372106		0.0954617		-0.196857		-0.0336445			0.529521	0.214691	0.274372	-0.0834484	-0.191505	-0.202209	0.0300588	-0.0973479
Q2G0G1_C103	Q2G0G1	CEYCTTGRETLUR	adh	Alcohol dehydrogenase	no	Enzyme	Functional site	-0.0353502		0.0882106				0.181256			-0.223728	0.153027	-0.224772	0.401194			0.220949	0.141564
Q2FY33_C91	Q2FY33	ALYTALUNEEGGIIDDLVIYK	gcvT	Aminomethyltransferase	no	Enzyme		0.517506		-0.207817		-0.150552		0.070429			0.6371	0.397912	-0.164609	-0.251024	-0.133986	-0.167118	0.145612	-0.00475429
Q2G116_C37	Q2G116	IKUENCQR	SAOUHSC_00345	Uncharacterized protein	yes	not assigned		0.238282		0.0521329		0.0385871		-0.0999898			0.350384	0.12618	0.134089	-0.0298237	0.297015	-0.219841	-0.074517	-0.125463
Q2FXR4_C251	Q2FXR4	VGYHUAQGYFGVTPDLTCLGK	hemL1	Glutamate-1-semialdehyde 2,1-aminomutase 1	no	Enzyme		0.223688									0.3421	0.105276
Q2FY27_C180	Q2FY27	FKCNUGR	SAOUHSC_01646	Glucokinase, putative	no	Enzyme		0.285413		0.061497				-0.124247			0.434241	0.136585	0.125651	-0.002657			-0.0988609	-0.149633
P72360_C31	P72360	SVGIDFCUGGQVSIEAAALEK	scdA	Iron-sulfur cluster repair protein ScdA	no	not assigned				0.123764				0.0932196					0.233888	0.0136409			0.130272	0.0561673
Q2G2S7_C7	Q2G2S7	FIHUSDLHLDSPFK	SAOUHSC_01975	Uncharacterized protein	no	not assigned		0.668612				-0.417984		-0.0399491			0.740718	0.596507			-0.383379	-0.45259	-0.00840596	-0.0714923
Q2FY35_C80	Q2FY35	NFGVDNGFYPLGSUTMK	gcvPB	Probable glycine dehydrogenase (decarboxylating) subunit 2	no	Enzyme		0.312757		0.0207643		-0.0232637		-0.107775			0.367126	0.258388	0.0633389	-0.0218104	-0.0161596	-0.0303678	-0.0644572	-0.151092
P0A086_C12	P0A086	TKEYATLAGGUFWCMVKPFTSYPGIK	msrA2	Peptide methionine sulfoxide reductase MsrA 2	no	Enzyme	Functional site							0.187374									0.232661	0.142087
Q2FX98_C73	Q2FX98	DSEVLNSTFGUDPLEIVQTISR	SAOUHSC_01979	Uncharacterized protein	yes	Gene expression and Nucleic acid binding		0.35332		-0.345943		0.0598107		0.120121			0.375623	0.331017	-0.365407	-0.32648	0.124593	-0.00497143	0.129745	0.110497
Q2FXP5_C99	Q2FXP5	YLQCPUK	SAOUHSC_01791	Uncharacterized protein	yes	Gene expression and Nucleic acid binding		0.190669						-0.00446902			0.277271	0.104068					0.0695647	-0.0785027
Q2FZC4_C100	Q2FZC4	GLELGULFAFYGHTHVAK	SAOUHSC_01108	Phosphoesterase	no	not assigned		0.457123						-0.281432			0.209641	0.704606					-0.283755	-0.279109
Q2FYY3_C68	Q2FYY3	TLENKTEU	SAOUHSC_01290	Uncharacterized protein	no	not assigned		0.326892		-0.0449784				-0.117602			0.309409	0.344374	0.191815	-0.281772			-0.177196	-0.0580073
Q2FZZ2_C164	Q2FZZ2	ALANDPTVLLUDEATSALDPQTTDEILDLLLK	metN2	Methionine import ATP-binding protein MetN 2	no	Receptor/Transporter/Channel						0.151511									-0.0887456	0.391768
Q2FXY3_C73	Q2FXY3	LTMIQMIIDELGFGDIUDDEIKR	nadD	Probable nicotinate-nucleotide adenylyltransferase	yes	Enzyme				0.129229		-0.000880636							0.342441	-0.083982	-0.375048	0.373286
Q2G220_C174	Q2G220	SUDIESVESWK	SAOUHSC_02980	Uncharacterized protein	no	Enzyme		0.396168		-0.112184		-0.212221		0.0561305			0.502738	0.289598	0.0626744	-0.287043	-0.0492629	-0.375179	0.106214	0.00604663
Q2FZ02_C147	Q2FZ02	ERPDILIGVCGUMSQEESVVNK	miaB	tRNA-2-methylthio-N(6)-dimethylallyladenosine synthase	no	not assigned	Functional site					0.127462									0.22367	0.031254
Q2G0X6_C204	Q2G0X6	HVYDPTUGSGSLLLR	SAOUHSC_00397	Type I restriction-modification system, M subunit	no	Gene expression and Nucleic acid binding		0.411441		0.0781316		-0.0117652		-0.351948			1.02389	-0.201012	0.0780633	0.0781999	-0.0515337	0.0280033	-0.322397	-0.381498
Q2G0P7_C105	Q2G0P7	FGUANCYATFKDDIIDIVR	mcsA	Protein-arginine kinase activator protein	no	Gene expression and Nucleic acid binding		0.120005									0.140648	0.0993625
Q2FW03_C661	Q2FW03	CVUGHSETQAHMDQR	topB	DNA topoisomerase 3	no	Gene expression and Nucleic acid binding		0.26183		-0.144029							0.455334	0.0683269	-0.0876261	-0.200432
Q2FY40_C311	Q2FY40	LQVNNUVTVEPGVYIEGLGGIR	SAOUHSC_01626	Proline dipeptidase, putative	no	Enzyme		0.293796						-0.182231			0.272143	0.31545					-0.21419	-0.150273
Q2G2R7_C53	Q2G2R7	FILSTSDDSDYIUK	SAOUHSC_02129	Uncharacterized protein	no	Modulator/Scaffolding/Adaptor		0.364719		-0.170058		-0.192812		0.104612			0.384381	0.345056	-0.0748057	-0.26531	-0.133432	-0.252192	0.28948	-0.0802557
Q2G2M8_C97	Q2G2M8	EDGIYYYCNLSSPFVUDEEALK	SAOUHSC_02004	UPF0374 protein SAOUHSC_02004	no	not assigned		0.102428									0.0858325	0.119024
Q2FXM9_C266	Q2FXM9	QUNKLGKPVITATQMLDSMQR	pyk	Pyruvate kinase	yes	Enzyme								0.100715									-0.00508725	0.206518
Q2FYN7_C53	Q2FYN7	VIFUEADDWKPFYEAYGSQFEDIEIEMDRR	dapH	2,3,4,5-tetrahydropyridine-2,6-dicarboxylate N-acetyltransferase	no	Enzyme				0.099169									0.484396	-0.286058
Q2G1G2_C372	Q2G1G2	VVFIIDEUHR	SAOUHSC_00162	Type I restriction enzyme R Protein	no	Gene expression and Nucleic acid binding								0.0951702									0.141825	0.0485152
Q2G046_C255	Q2G046	FSESHACPIUGFSIGELEPR	uvrA	UvrABC system protein A	no	Gene expression and Nucleic acid binding								0.0886718									0.323428	-0.146084
Q2G1D8_C653	Q2G1D8	IPYDUCK	pflB	Formate acetyltransferase	no	Enzyme		0.0379318		-0.27411		0.152046		0.168416			0.117936	-0.0420721	-0.25933	-0.28889	0.154847	0.149245	0.22336	0.113473
Q2G1J4_C92	Q2G1J4	SUDISLVMR	SAOUHSC_00128	Cap5O protein/UDP-N-acetyl-D-mannosaminuronic acid dehydrogenase	no	Enzyme				0.361078		-0.278239							0.0723116	0.649845	-0.438816	-0.117662
Q2FZ36_C269	Q2FZ36	TLNSUGVK	sucD	Succinate--CoA ligase [ADP-forming] subunit alpha	no	Enzyme		0.620949		-0.310869		-0.27001		0.0413497			0.77424	0.467659	-0.220087	-0.401651	-0.182567	-0.357453	0.0366501	0.0460494
Q2FZ66_C300	Q2FZ66	GLNUHVNLIPVNHVPER	rlmN	Probable dual-specificity RNA methyltransferase RlmN	no	Gene expression and Nucleic acid binding								0.0801451									0.145221	0.0150693
Q2G2Q5_C100	Q2G2Q5	ETFKKEDLEPWTSUEFDFTR	SAOUHSC_00278	Uncharacterized protein	no	not assigned								0.0793416									0.238542	-0.0798592
Q2G1E5_C248	Q2G1E5	ASMQFEUSWSANIKEDK	SAOUHSC_00180	Uncharacterized protein	no	Enzyme		0.0780797									-0.00540579	0.161565
Q2FWJ0_C39	Q2FWJ0	GLIDESLTUQDKVELIK	SAOUHSC_02302	SigmaB regulation protein RsbU, putative	no	Enzyme	0					0.0779107									0.196229	-0.0404079
Q2FXQ7_C13	Q2FXQ7	FKFNEDEENLKUSFCGKDQDQVK	clpX	ATP-dependent Clp protease ATP-binding subunit ClpX	no	Enzyme		0.14798						-0.0857738			0.332278	-0.0363187					0.367259	-0.538807
Q2FYS9_C512	Q2FYS9	DAGLQPYLDDLGFNLVGYGCTTUIGNSGPLLPEIEK	SAOUHSC_01347	Aconitate hydratase	no	Enzyme		-0.0787252		-0.0445662		0.175839					0.0706641	-0.228114	-0.0894208	0.00028851	0.204892	0.146786
Q2FXU5_C8	Q2FXU5	TTYUGLVTEAFLGQEITLK	aspS	Aspartate--tRNA ligase	yes	Gene expression and Nucleic acid binding		0.436878		-0.138017		-0.167255		-0.0871182			0.541019	0.332737	-0.126722	-0.149313	-0.0772237	-0.257287	-0.0553214	-0.118915
Q2FWZ3_C316	Q2FWZ3	AIEYAQLTGNEVVLDTYUGIGTIGLYMAPLAK	SAOUHSC_02113	RNA methyltransferase, TrmA family, putative	no	Gene expression and Nucleic acid binding	Functional site	0.03957									0.142609	-0.0634695
Q2G1B1_C199	Q2G1B1	IGFSDIFFNVDQLTSSEASLLQLSTGEPULR	SAOUHSC_00234	Uncharacterized protein	no	Gene expression and Nucleic acid binding				0.105271		-0.0715403							0.147176	0.0633649	0.1125	-0.255581
Q2G149_C209	Q2G149	LADQHSLNHVAFUCISTGVFAFPQDEAAEIAVR	SAOUHSC_00306	Uncharacterized protein	no	not assigned		0.0218256				-0.00433696		0.0036869			0.0669502	-0.0232991			0.587077	-0.595751	-0.0836151	0.0909889
Q2FY08_C422	Q2FY08	QDEIGTPYUVTFDFDSLEDNQVTVR	glyQS	Glycine--tRNA ligase	yes	Modulator/Scaffolding/Adaptor		0.449556		-0.261235		-0.210295		0.0343712			0.500121	0.398992	-0.214558	-0.307912	-0.124346	-0.296244	0.120573	-0.0518308
Q2FXZ4_C143	Q2FXZ4	EADEELUIELDPGMAFGTGDHPTTSMCLK	prmA	Ribosomal protein L11 methyltransferase	no	Enzyme								0.00842058									0.066537	-0.0496958
Q2FUQ4_C74	Q2FUQ4	HFYDSIAPSFYFDFNQPISIUDVGAGAGFPSIPLK	rsmG	Ribosomal RNA small subunit methyltransferase G	no	Gene expression and Nucleic acid binding	Functional site	0.508168		-0.175502		-0.126132		-0.203696			0.647176	0.369159	-0.176903	-0.1741	0.0871912	-0.339455	-0.159009	-0.248382
Q2G218_C81	Q2G218	AGEYSDCHDADLVVIUAGAAQKPGETR	ldh1	L-lactate dehydrogenase 1	no	Enzyme	Functional site			0.0650003				-0.069837					0.0436245	0.0863762			0.0384362	-0.17811
Q2FY73_C103	Q2FY73	HFHHHLVCMEUGR	SAOUHSC_01592	Transcriptional regulator, Fur, putative	yes	Gene expression and Nucleic acid binding				-0.00751412									-0.0279544	0.0129262
Q2G0N5_C60	Q2G0N5	IFGPTKDWEUSCGK	rpoC	DNA-directed RNA polymerase subunit beta'	yes	Gene expression and Nucleic acid binding		0.0440274		-0.104066		0.0884451		-0.0382707			0.169668	-0.0816138	-0.100654	-0.107477	-0.0168185	0.193709	0.00647756	-0.083019
Q2FYY6_C210	Q2FYY6	YADAVTAUDNIQTFK	SAOUHSC_01287	Glutamine synthetase	yes	Enzyme		0.628838		-0.00223787		-0.149361		-0.491505			0.70186	0.555816	0.105008	-0.109483	-0.104279	-0.194443	-0.405738	-0.577272
Q2G1C6_C421	Q2G1C6	IIFSGTFVAGSHVSUHNQR	SAOUHSC_00199	Uncharacterized protein	no	Enzyme		-0.0167101									0.0258793	-0.0592995
Q2G144_C54	Q2G144	QLNAPSDIEVEHSDIMTASPEMADLFIUGR	SAOUHSC_00311	Uncharacterized protein	no	Receptor/Transporter/Channel				0.0152211		-0.0275611		-0.00958673					0.151599	-0.121157	-0.109623	0.0545012	0.250113	-0.269286
Q2G2A1_C48	Q2G2A1	IIAGGYNGSVAGEVHCIDEGULIEDGHCIR	SAOUHSC_01692	Uncharacterized protein	no	Enzyme						-0.0482043									0.158208	-0.254616
P0A011_C276	P0A011	FNGVLUGR	lacD	Tagatose 1,6-diphosphate aldolase	no	Enzyme		0.465897		0.0247144		-0.292542		-0.24869			0.510962	0.420833	-0.0389843	0.088413	-0.237115	-0.347968	-0.25972	-0.23766
Q2G2A1_C88	Q2G2A1	QGVSTEGATIYVTHFPULNCTK	SAOUHSC_01692	Uncharacterized protein	no	Enzyme	Functional site	-0.00216905		-0.233143				0.172726			0.0619835	-0.0663216	-0.344612	-0.121675			0.157432	0.188021
Q2FUQ3_C239	Q2FUQ3	AFSFETTEYILDQLPUWLTYTNAETHK	mnmG	tRNA uridine 5-carboxymethylaminomethyl modification enzyme MnmG	yes	not assigned		-0.0100939		-0.140096		0.367723		-0.282071			0.063779	-0.0839667	-0.0703302	-0.209862	0.434562	0.300885	-0.0589989	-0.505144
P95689_C260	P95689	FTGQSAUFR	serS	Serine--tRNA ligase	yes	Gene expression and Nucleic acid binding	Functional site	0.547716		-0.308724		-0.211727		-0.0934251			0.631103	0.46433	-0.240676	-0.376771	-0.207984	-0.21547	-0.0405913	-0.146259
Q2FZV8_C119	Q2FZV8	VAGNPENU	SAOUHSC_00877	Uncharacterized protein	no	Modulator/Scaffolding/Adaptor		-0.134404						0.062063			-0.0384952	-0.230313					0.225152	-0.101026
Q2G1U8_C227	Q2G1U8	DKQGNAVFISHESIGYLADUYGFVQK	SAOUHSC_02690	Uncharacterized protein	no	not assigned								-0.0737193									-0.164933	0.0174944
Q2FZ58_C95	Q2FZ58	GFUKNIESESEINSK	SAOUHSC_01193	Uncharacterized protein SAOUHSC_01193	no	Enzyme								-0.0757111									-0.054692	-0.0967303
Q2FV14_C266	Q2FV14	YQINVLUCTPTEYR	SAOUHSC_02929	Acetyl-CoA synthetase, putative	no	Enzyme								-0.076186									-0.15266	0.00028851
Q2FV13_C18	Q2FV13	SYVIEELDDULTIQK	SAOUHSC_02930	Uncharacterized protein	no	not assigned		0.564574		-0.461552		-0.258438		0.0786297			0.7122	0.416948	-0.689334	-0.23377	-0.264409	-0.252467	0.227741	-0.0704817
Q2FX00_C53	Q2FX00	VNVVEINETEGITFDEUDIFFIGGGSDR	SAOUHSC_02106	Uncharacterized protein	yes	Enzyme								-0.101209									-0.0240471	-0.178371
Q2FXP3_C31	Q2FXP3	EUENCGTR	nrdR	Transcriptional repressor NrdR	no	Gene expression and Nucleic acid binding		-0.287823						0.185736			-0.226172	-0.349474					0.430606	-0.0591342
Q2FXP9_C148	Q2FXP9	YADEUKDIATVEQKPK	infC	Translation initiation factor IF-3	yes	Modulator/Scaffolding/Adaptor		0.295961		-0.383554				-0.0181749			0.364797	0.227125	-0.241799	-0.52531			0.0923428	-0.128693
Q2FUY1_C104	Q2FUY1	EVNELUTALTDCTVLGLPR	arcR	HTH-type transcriptional regulator ArcR	no	Gene expression and Nucleic acid binding	Functional site	-0.107451									0.157173	-0.372076
Q2FXZ4_C163	Q2FXZ4	EADEELCIELDPGMAFGTGDHPTTSMULK	prmA	Ribosomal protein L11 methyltransferase	no	Enzyme		-0.124236									0.00129784	-0.249771
Q2G0I8_C196	Q2G0I8	LUEDPQYMSHVK	SAOUHSC_00577	Mevalonate kinase, putative	yes	Enzyme		0.389617		0.0539937		-0.377967		-0.196794			0.448439	0.330796	0.0796669	0.0283206	-0.391403	-0.36453	-0.1705	-0.223088
Q2G2M6_C28	Q2G2M6	MYVUGPTVYNYIHIGNAR	cysS	Cysteine--tRNA ligase	yes	Gene expression and Nucleic acid binding	Functional site	0.0985543		-0.211977		-0.0784732		0.0483723			0.164679	0.0324301	-0.180089	-0.243864	0.0390459	-0.195992	0.0802483	0.0164963
Q2G2A1_C43	Q2G2A1	IIAGGYNGSVAGEVHUIDEGCLIEDGHCIR	SAOUHSC_01692	Uncharacterized protein	no	Enzyme		-0.195983						0.0411127			0.183328	-0.575293					0.155361	-0.0731352
Q2FWD4_C248	Q2FWD4	IEAGTYMCIAAAUGENVILNNIVPK	murA	UDP-N-acetylglucosamine 1-carboxyvinyltransferase	no	Enzyme		0.303953				-0.261498		-0.197494			0.423309	0.184598			0.300885	-0.823882	-0.219438	-0.17555
Q2G052_C141	Q2G052	HTSFASUDVIPDFNNDEIEIEINPDDITVDTFR	prfB	Peptide chain release factor 2	yes	Gene expression and Nucleic acid binding				-0.71088				0.548858					-0.882199	-0.539561			0.186754	0.910963
Q9ZAH6_C80	Q9ZAH6	HVAFNDIDUYNDELGKPK	acpS	Holo-[acyl-carrier-protein] synthase	yes	Enzyme		0.185491		0.208546		-0.2241		-0.345472			0.286645	0.0843364	0.19862	0.218471	-0.066231	-0.381968	-0.472749	-0.218195
Q2FYG5_C16	Q2FYG5	ALDVUCGTGDWTIALSK	SAOUHSC_01487	Menaquinone biosynthesis methyltransferase, putative	no	not assigned		0.473576		-0.650501							0.491186	0.455965	-0.786223	-0.514779
Q2FY49_C129	Q2FY49	TLPGNAQSIGAILDQINWEEVLGTICGDDTULIICR	argR	Arginine repressor	no	Gene expression and Nucleic acid binding		0.17771		0.170838		-0.0208437		-0.529414			0.260507	0.0949116	0.262794	0.078883	0.0856966	-0.127384	-0.450045	-0.608782
Q2FZI7_C156	Q2FZI7	KUDIRPDDSKEQLEEK	purN	Phosphoribosylglycinamide formyltransferase	no	Enzyme		0.283933		-0.192358		-0.23461		-0.0712208			0.31545	0.252416	-0.134635	-0.25008	-0.234771	-0.234448	0.110764	-0.253206
Q2G230_C90	Q2G230	VVLUDRYIDSSLAYQGYAR	tmk	Thymidylate kinase	yes	Enzyme				-0.00674146		-0.208392							-0.0982275	0.0847446	-0.31973	-0.0970543
Q2FXT6_C306	Q2FXT6	FADDLRPLDENUDCYTCQNYSR	tgt	Queuine tRNA-ribosyltransferase	no	Gene expression and Nucleic acid binding	Functional site							-0.232871									-0.0451932	-0.420549
Q2FZ92_C422	Q2FZ92	VQDIIEPNDVVLLSPAUASWDQYSTFEER	murD	UDP-N-acetylmuramoylalanine--D-glutamate ligase	yes	Enzyme		-0.252245									0.0246034	-0.529094
Q2FZ14_C210	Q2FZ14	LVLPSEVAHTUAYLYHPNAR	SAOUHSC_01257	Uncharacterized protein	no	not assigned								-0.252689									-0.679273	0.173895
Q2G258_C48	Q2G258	VIDQLKLEGUK	birA	Bifunctional ligase/repressor BirA	yes	Enzyme		0.421808		-0.305502		-0.361222		-0.0104631			0.494364	0.349252	-0.321969	-0.289034	-0.254836	-0.467609	0.138421	-0.159347
Q2FZC7_C228	Q2FZC7	LNALMGTGGLQQUGNSQNCVNACPK	SAOUHSC_01105	Iron-sulphur subunit of succinate dehydrogenase, putative	no	not assigned								-0.286121									-0.105287	-0.466955
Q2G190_C199	Q2G190	NNLYTAGQUTWYVFDKR	SAOUHSC_00256	Uncharacterized protein	no	not assigned		-0.286225									-0.0408976	-0.531552
Q2G2A3_C47	Q2G2A3	GNLGGVULNVGCIPSK	SAOUHSC_01043	Dihydrolipoyl dehydrogenase	no	Enzyme		0.105619				-0.226424		-0.171133			0.0691522	0.142087			-0.208061	-0.244788	-0.134921	-0.207345
Q2FVL9_C66	Q2FVL9	QGPLSEGTVSGEYVFUPLHDQK	SAOUHSC_02683	Assimilatory nitrite reductase [NAD(P)H], small subunit, putative	no	Enzyme		0.0214149		-0.280451		-0.0342652		0.000107629			0.092884	-0.0500543	-0.249771	-0.31113	-0.0955429	0.0270125	0.0297002	-0.029485
Q2G0U3_C264	Q2G0U3	TIUAITK	SAOUHSC_00434	Transcriptional regulator, lysR family, putative	no	Gene expression and Nucleic acid binding				-0.304677									-0.162832	-0.446522
Q2FZZ6_C35	Q2FZZ6	FVESVENGNLPVLPUIEMDLK	SAOUHSC_00838	Uncharacterized protein	no	not assigned		0.0152259		-0.413856		-0.076918		0.161079			0.0527251	-0.0222733	-0.358084	-0.469627	0.00926925	-0.163105	0.00115369	0.321004
Q2FZF3_C66	Q2FZF3	STEVVADIHITGTYTMPUAR	SAOUHSC_01077	Uncharacterized protein	yes	not assigned				0.309158		-0.862473		0.236022					0.336055	0.282262	-1.77458	0.0496308	0.184217	0.287827
P0A011_C153	P0A011	IGSEUVAEDIPFFLEVLTYDDNIPDNGSVEFAK	lacD	Tagatose 1,6-diphosphate aldolase	no	Enzyme				-0.132967		-0.206655							-0.102326	-0.163607	-0.131661	-0.281649
Q2FZ38_C26	Q2FZ38	EVTQLINAVNTIEELENHEUFLDER	rnhB	Ribonuclease HII	no	Gene expression and Nucleic acid binding				-0.681474				0.336833					-0.789137	-0.57381			0.1153	0.558366
Q2G2A3_C52	Q2G2A3	GNLGGVCLNVGUIPSK	SAOUHSC_01043	Dihydrolipoyl dehydrogenase	no	Enzyme		0.414027		-0.104881		-0.415503		-0.249528			0.603027	0.225028	-0.0436162	-0.166146	-0.361416	-0.46959	-0.198874	-0.300182
Q2FZL8_C347	Q2FZL8	GLYGAPVGYIDIYDDUEFIVAIR	SAOUHSC_00982	Uncharacterized protein	no	Enzyme				-0.21493		-0.148079							-0.115254	-0.314607	-0.126722	-0.169436
Q2FZ07_C53	Q2FZ07	YSTIATNUYDTAEVIK	SAOUHSC_01264	Uncharacterized protein	no	not assigned		0.238591		-0.519892		-0.174118		0.0817641			0.393526	0.0836559	-0.535499	-0.504284	-0.139474	-0.208761	0.176833	-0.0133051
Q2FY37_C149	Q2FY37	SSVUFDAPSWYELVVEGR	lipM	Octanoyltransferase LipM	no	Enzyme	Functional site	0.32087		-0.162358		-0.301656		-0.235696			0.472072	0.169668	-0.130239	-0.194476	-0.266975	-0.336337	-0.25056	-0.220833
Q2FVL9_C47	Q2FVL9	IHAIHNIUPHK	SAOUHSC_02683	Assimilatory nitrite reductase [NAD(P)H], small subunit, putative	no	Enzyme		-0.111552		-0.300114		-0.0869489		0.0868986			-0.0669109	-0.156193	-0.294261	-0.305967	0.100439	-0.274337	0.112367	0.0614306
Q2FZ74_C357	Q2FZ74	NGDWTLQQLVDYLTIKPUETFNLEYGTLK	pyrC	Dihydroorotase	no	Enzyme				-0.03566		-0.392862							-0.0853896	0.0140696	-0.3394	-0.446325
Q2FY73_C140	Q2FY73	LTFHGVUETCQAK	SAOUHSC_01592	Transcriptional regulator, Fur, putative	yes	Gene expression and Nucleic acid binding				-0.179407		-0.2931							-0.124314	-0.234499	-0.184146	-0.402054
Q2G1R3_C87	Q2G1R3	GIDLNMGUPVANVAK	SAOUHSC_00039	tRNA-dihydrouridine synthase	no	Gene expression and Nucleic acid binding	Functional site	-0.150735						-0.325634			0.0267293	-0.328199					0.185105	-0.836372
Q2G2S7_C228	Q2G2S7	GULLIEGDHLK	SAOUHSC_01975	Uncharacterized protein	no	not assigned		0.250811		-0.809529				0.0749111			0.371615	0.130008	-0.582858	-1.0362			0.0603241	0.0894982
Q2FZ67_C375	Q2FZ67	IGGEIIYSTUTIEQLENENVIYTFLK	SAOUHSC_01184	16S rRNA (cytosine(967)-C(5))-methyltransferase	no	Gene expression and Nucleic acid binding	Functional site	0.16881		-0.489719		-0.309124		0.145752			0.200379	0.137241	-0.509409	-0.470029	-0.363494	-0.254754	0.250962	0.0405418
Q2G157_C88	Q2G157	EVDELIESQUEVIALDATLQQRPK	nanE	Putative N-acetylmannosamine-6-phosphate 2-epimerase	no	Enzyme		0.266242		-0.0209089		-0.568733		-0.181607			0.392098	0.140386	0.0432045	-0.0850222	-0.474091	-0.663374	-0.0638313	-0.299383
Q2FXH9_C178	Q2FXH9	TEEMPTLGFAPDAEFPUIHGEK	SAOUHSC_01868	Putative dipeptidase SAOUHSC_01868	no	Enzyme	Functional site	0.293604		-0.222644		-0.33851		-0.242683			0.367328	0.219879	-0.21886	-0.226428	-0.340873	-0.336146	-0.231436	-0.25393
Q2FXX1_C243	Q2FXX1	LIEESPUAALTEER	SAOUHSC_01709	Acetyl-CoA carboxylase, biotin carboxylase, putative	no	Enzyme		0.262839				-0.0782114		-0.70448			0.183171	0.342507			-0.0844103	-0.0720126	-0.546315	-0.862645
Q2FXE8_C198	Q2FXE8	ELFNVIQADEIGADIITUPADVVK	SAOUHSC_01901	Transaldolase	no	Enzyme		0.00175727		-0.31865		-0.154735		-0.049598			0.0882088	-0.0846942	-0.242855	-0.394446	-0.102315	-0.207156	-0.00322842	-0.0959676
Q2FXL9_C56	Q2FXL9	QVLFUPK	SAOUHSC_01816	Uncharacterized peptidase SAOUHSC_01816	no	not assigned		-0.0915899		-0.362854				-0.0672914			0.0519985	-0.235178	-0.294809	-0.430898			-0.0883621	-0.0462207
Q2G1D8_C160	Q2G1D8	EMLNURK	pflB	Formate acetyltransferase	no	Enzyme		0.339871		-0.424818		-0.450369		0.00800318			0.446468	0.233275	-0.372374	-0.477261	-0.395245	-0.505492	0.068602	-0.0525957
Q2FWG9_C41	Q2FWG9	MIEEDVYUDDVLTQIR	SAOUHSC_02322	Uncharacterized protein	no	Gene expression and Nucleic acid binding		-0.5291									-0.50081	-0.557391
P95689_C353	P95689	EISSUSNCTDFQAR	serS	Serine--tRNA ligase	yes	Gene expression and Nucleic acid binding	Functional site	-0.230108		-0.6076		0.153026		0.139521			-0.219377	-0.240839	-0.670429	-0.544771	0.154583	0.151469	0.205537	0.0735038
Q2FXM8_C175	Q2FXM8	DUGDLALWAGLSVGAETIVVPEVK	pfkA	ATP-dependent 6-phosphofructokinase	yes	Enzyme		-0.3054		-0.0640294		-0.0233511		-0.157131			-0.180136	-0.430664	-0.138839	0.0107798	0.0779266	-0.124629	-0.112802	-0.20146
Q2FZH5_C557	Q2FZH5	AVDUATQEEVIELVNNYVK	SAOUHSC_01029	Phosphoenolpyruvate-protein phosphotransferase	no	Enzyme		0.0997663		-0.47632		-0.131326		-0.0424725			0.0990932	0.100439	-0.425773	-0.526868	-0.173645	-0.0890064	-0.0789598	-0.00598516
Q2FXR4_C264	Q2FXR4	VGYHCAQGYFGVTPDLTULGK	hemL1	Glutamate-1-semialdehyde 2,1-aminomutase 1	no	Enzyme		0.221307		-0.397327		-0.336248		-0.0427075			0.301705	0.14091	-0.367136	-0.427518	-0.292988	-0.379507	0.0521376	-0.137553
Q2FX05_C123	Q2FX05	VUDVATMAFENAIAK	map	Methionine aminopeptidase	yes	Enzyme		0.535166		0.178953		-0.640378		-0.647153			0.63385	0.436482	0.260026	0.0978804	-0.568324	-0.712433	-0.622798	-0.671508
Q2FXT9_C680	Q2FXT9	EGMLLUQHLSVKPDTLK	SAOUHSC_01744	Uncharacterized protein	no	Gene expression and Nucleic acid binding				0.0108838		-0.600973							-0.534245	0.556012	-0.825645	-0.376302
Q2FZ92_C350	Q2FZ92	ATNTLATQFALNSFNQPIIWLUGGLDR	murD	UDP-N-acetylmuramoylalanine--D-glutamate ligase	yes	Enzyme		-0.201261		-0.488673		-0.166737		0.238952			-0.101861	-0.300662	-0.433584	-0.543762	-0.129955	-0.203519	0.183709	0.294194
Q2G078_C719	Q2G078	LLSVEECTSUSI	SAOUHSC_00742	Ribonucleoside-diphosphate reductase	yes	Enzyme		-0.413563						-0.218276			-0.355018	-0.472109					-0.153447	-0.283106
Q2FWX8_C61	Q2FWX8	EGEQUGVASLK	SAOUHSC_02143	Uncharacterized protein SAOUHSC_02143	no	Enzyme		0.509659		-0.397237		-0.613481		-0.133081			0.578415	0.440903	-0.226561	-0.567912	-0.481948	-0.745014	-0.023666	-0.242497
Q2FUQ3_C274	Q2FUQ3	YUPSIEDK	mnmG	tRNA uridine 5-carboxymethylaminomethyl modification enzyme MnmG	yes	not assigned	Functional site	-0.245369		-0.441621				0.0415339			-0.116618	-0.374121	-0.661114	-0.222128			0.0546401	0.0284277
Q2FZ36_C133	Q2FZ36	LVGPNCPGVITADEUK	sucD	Succinate--CoA ligase [ADP-forming] subunit alpha	no	Enzyme		0.0455284		-0.578743		-0.182505		0.0589843			0.129745	-0.0386878	-0.51239	-0.645097	-0.121094	-0.243916	0.132774	-0.0148056
Q2FZU1_C57	Q2FZU1	ALDMGAVEUHIIDATK	argG	Argininosuccinate synthase	no	Enzyme				-0.0311035		-0.627843							-0.00638301	-0.055824	-0.553405	-0.70228
Q9ZAH5_C311	Q9ZAH5	VUMDQTIVK	alr1	Alanine racemase 1	no	Enzyme	Functional site	-0.0758064		-0.241905		-0.171294		-0.171804			-0.00448274	-0.14713	-0.24775	-0.23606	-0.189927	-0.15266	-0.114698	-0.22891
Q2FXH9_C466	Q2FXH9	KQLFNATSIYLEAIYSLUVEE	SAOUHSC_01868	Putative dipeptidase SAOUHSC_01868	no	Enzyme		-0.375653		-0.302843							-0.492708	-0.258598	-0.059946	-0.54574
Q2G159_C284	Q2G159	SKNDAALYGULQ	SAOUHSC_00296	ROK family protein	no	not assigned				-0.295678		-0.385004							-0.245608	-0.345748	-0.310611	-0.459397
Q2FZP0_C456	Q2FZP0	VTMTDYUYR	SAOUHSC_00960	Uncharacterized protein	no	not assigned		-0.233428		-0.630303		0.176458		0.00309445			-0.0199601	-0.446895	-0.513749	-0.746858	0.435202	-0.0822857	-0.0160013	0.0221902
Q2FWC7_C246	Q2FWC7	GUKPYYVENGAFSGAIGALYLEK	coaW	Type II pantothenate kinase	yes	Enzyme		-0.102744		-0.328176				-0.260226			-0.0631981	-0.14229	-0.20234	-0.454012			-0.192035	-0.328417
Q2FXP0_C285	Q2FXP0	NSHYUPVCQK	SAOUHSC_01796	Formamidopyrimidine-DNA glycosylase	no	Gene expression and Nucleic acid binding				-0.692867									-0.389394	-0.99634
Q2G059_C54	Q2G059	EHKDATHNUSAYTIGPEMNIQK	SAOUHSC_00763	Uncharacterized protein	no	not assigned		0.437508		-0.332509		-0.546352		-0.282897			0.49917	0.375846	-0.147969	-0.517048	-0.479251	-0.613454	0.116764	-0.682557
Q2FXE8_C179	Q2FXE8	LLWASUR	SAOUHSC_01901	Transaldolase	no	Enzyme		-0.117192		-0.419858		-0.132186		-0.0560007			-0.069467	-0.164917	-0.336883	-0.502832	-0.156257	-0.108114	-0.0648269	-0.0471744
Q2G041_C134	Q2G041	GVSYUAVCDGAFFK	SAOUHSC_00785	Thioredoxin reductase	yes	Enzyme		0.280224		-0.402357		-0.545119		-0.0737126			0.290285	0.270162	-0.376227	-0.428488	-0.496122	-0.594117	-0.278173	0.130747
Q2FWH4_C15	Q2FWH4	QIQSWIPUEIEDQFLNQEINGVTIDSR	murF	UDP-N-acetylmuramoyl-tripeptide--D-alanyl-D-alanine ligase	yes	Enzyme		0.0457493		-0.954982				0.161273			0.100036	-0.00853711	-0.921745	-0.988218			0.252295	0.0702519
Q2FWD1_C239	Q2FWD1	ESVIEUR	pyrG	CTP synthase	yes	Enzyme	Functional site	-0.152112		-0.608283		-0.0672513		0.0607512			-0.0955867	-0.208637	-0.503282	-0.713284	-0.0367884	-0.0977143	0.170787	-0.049285
Q2FVT0_C55	Q2FVT0	GYNITGVUTSNK	rpiA	Ribose-5-phosphate isomerase A	yes	Enzyme		0.334488		0.0810306		-0.632732		-0.564859			0.424431	0.244545	0.0700577	0.0920036	-0.613216	-0.652248	-0.602458	-0.527259
Q2FXU4_C191	Q2FXU4	HFEPVIHEFUSDCQSR	hisS	Histidine--tRNA ligase	yes	Gene expression and Nucleic acid binding		-0.260643		-0.465143		0.00335025		-0.0660963			-0.193866	-0.327421	-0.47291	-0.457375	0.0900404	-0.0833399	-0.0350765	-0.097116
Q2FZU1_C32	Q2FZU1	GYDVVAUCLDVGEGKDLDIVYKK	argG	Argininosuccinate synthase	no	Enzyme				-0.197812		-0.642881							-0.0527154	-0.342909	-0.663031	-0.622732
Q2FZV8_C103	Q2FZV8	QSLMGGGFQIDNPNAIASCGUGSSFR	SAOUHSC_00877	Uncharacterized protein	no	Modulator/Scaffolding/Adaptor		-0.573062						-0.290207			-0.44187	-0.704253					-0.381987	-0.198427
O06446_C829	O06446	NDDUPCGSGK	secA1	Protein translocase subunit SecA 1	yes	Receptor/Transporter/Channel	Functional site	-0.495073		-0.402791		0.106942		-0.131341			-0.420469	-0.569678	-0.413596	-0.391986	0.112233	0.10165	-0.0471297	-0.215552
Q2FZX3_C18	Q2FZX3	VDQHYFELIENYREUFNEEQFIAR	SAOUHSC_00862	Uncharacterized protein	no	not assigned		-0.903477						-0.0640589			-0.859064	-0.94789					-0.0425905	-0.0855273
Q2FWD5_C32	Q2FWD5	CNDUSAHFSDMKR	SAOUHSC_02364	Uncharacterized protein	no	not assigned		-0.505772						-0.476164			-0.446639	-0.564905					-0.294314	-0.658014
Q2FVT0_C181	Q2FVT0	VNEDVAFITDNGNYILDUK	rpiA	Ribose-5-phosphate isomerase A	yes	Enzyme		0.163165		-0.0727989		-0.651349		-0.424117			0.177982	0.148348	-0.0766606	-0.0689373	-0.573574	-0.729124	-0.374262	-0.473971
Q2G1G7_C103	Q2G1G7	CULNASIISR	SAOUHSC_00156	Uncharacterized protein	no	Enzyme		-0.182848		-0.121779		-0.722968		0.0133347			0.111566	-0.477261	0.304628	-0.548185	-0.492302	-0.953635	0.222186	-0.195517
Q2FZL5_C72	Q2FZL5	DDQNVSVIVLTGEGDLAFUSGGDQK	menB	1,4-dihydroxy-2-naphthoyl-CoA synthase	no	Enzyme		-0.298907		-0.252241		-0.352767		-0.110903			-0.172197	-0.425617	-0.216786	-0.287695	-0.295855	-0.409679	-0.0942486	-0.127557
Q2G1Y9_C9	Q2G1Y9	QVQCIIUDAK	SAOUHSC_01060	Uncharacterized protein	no	not assigned		-0.986571						-0.0471978			-0.757696	-1.21545					0.00690837	-0.101304
Q2FY19_C134	Q2FY19	HKLEVYGVCESUQD	fur	Ferric uptake regulation protein	no	Gene expression and Nucleic acid binding		0.114255		-0.623821		-0.397587		-0.147629			0.281075	-0.0525657	-0.551289	-0.696354	-0.366355	-0.428818	-0.0987991	-0.196459
Q2FV11_C478	Q2FV11	DGETALHPSUSAK	betA	Oxygen-dependent choline dehydrogenase	no	Enzyme	Functional site	0.184079		-0.329637		-0.502898		-0.425415			0.286673	0.0814856	-0.282494	-0.376781	-0.412262	-0.593535	-0.373797	-0.477033
Q2FY27_C178	Q2FY27	FKUNCGR	SAOUHSC_01646	Glucokinase, putative	no	Enzyme		0.103006		-0.18761		-0.640359		-0.3952			0.0694272	0.136585	-0.144281	-0.230939	-0.652221	-0.628497	-0.527429	-0.262971
Q2FV14_C191	Q2FV14	AVTHUHGWGFAHLQMAPK	SAOUHSC_02929	Acetyl-CoA synthetase, putative	no	Enzyme		-0.331656		-0.627418		-0.242323		0.0544569			-0.183638	-0.479673	-0.576325	-0.678511	-0.221068	-0.263577	0.11703	-0.00811631
Q2FVM2_C453	Q2FVM2	ETYLDTYHAQGSTGYNYGGEHFGDNUEGCGVAVGSGK	SAOUHSC_02680	Nitrate reductase, beta subunit	no	Enzyme		-1.14986									-1.13134	-1.16838
Q2G0Q9_C238	Q2G0Q9	MPVQFEUNCSHEK	hslO	33 kDa chaperonin	no	Modulator/Scaffolding/Adaptor		-0.76868		-0.417447		0.0497321		-0.0217553			-0.613454	-0.923906	-0.380803	-0.454091	0.0107798	0.0886844	0.018919	-0.0624296
Q2G1D8_C414	Q2G1D8	ESYGDDYGIACUVSAMTIGK	pflB	Formate acetyltransferase	no	Enzyme	Functional site	-0.063347		-0.64263		-0.463571		0.00656475			-0.00670707	-0.119987	-0.615773	-0.669487	-0.444086	-0.483057	0.0413973	-0.0282678
Q2G1D8_C123	Q2G1D8	AAUEAYGYELDEETEK	pflB	Formate acetyltransferase	no	Enzyme		0.20618		-0.50173		-0.731494		-0.137433			0.302918	0.109441	-0.445549	-0.557911	-0.692871	-0.770117	-0.100376	-0.174491
O06446_C840	O06446	FKNUHGK	secA1	Protein translocase subunit SecA 1	yes	Receptor/Transporter/Channel	Functional site	-0.23344		-0.60616		-0.306534		-0.031276			-0.224705	-0.242175	-0.509266	-0.703055	-0.285231	-0.327837	0.0732718	-0.135824
Q2FX12_C13	Q2FX12	VDVAFVCLGNIUR	ptpA	Low molecular weight protein-tyrosine-phosphatase PtpA	no	Enzyme	Functional site	0.295283		-0.979867		-0.604818		0.0661485			0.387804	0.202762	-1.10219	-0.857547	-0.554464	-0.655172	0.147307	-0.0150097
Q2G0R1_C19	Q2G0R1	EVLLTEEDIQNIUK	SAOUHSC_00485	Hypoxanthine phosphoribosyltransferase	no	Enzyme		-0.242977				-0.228941		-0.766528			-0.122711	-0.363244			-0.337321	-0.120561	-0.690668	-0.842388
Q2G1G7_C329	Q2G1G7	EDLPLLSUIEPNDTFDFQK	SAOUHSC_00156	Uncharacterized protein	no	Enzyme		-0.68828						-0.57544			-0.587598	-0.788963					-0.530302	-0.620579
Q2FXL9_C164	Q2FXL9	EGVTEUEVVNHIEQTIK	SAOUHSC_01816	Uncharacterized peptidase SAOUHSC_01816	no	not assigned		-0.409919		-0.584679		-0.0604432		-0.22884			-0.181673	-0.638164	-0.438679	-0.73068	-0.104418	-0.0164682	-0.0441813	-0.413499
Q2FZ66_C134	Q2FZ66	IGCTFUASTLGGLKR	rlmN	Probable dual-specificity RNA methyltransferase RlmN	no	Gene expression and Nucleic acid binding	Functional site	-1.304									-1.23576	-1.37224
Q2FYJ2_C326	Q2FYJ2	TSTMALAQGNIDYILEIUDK	ald1	Alanine dehydrogenase 1	no	Enzyme		-0.0557001		-0.608092		-0.63801		-0.0288886			0.000916222	-0.112316	-0.582421	-0.633763	-0.653378	-0.622643	0.0438345	-0.101612
Q2FWE3_C12	Q2FWE3	ILFVCTGNTUR	ptpB	Low molecular weight protein-tyrosine-phosphatase PtpB	no	Enzyme	Functional site	-0.553663						-0.777917			-0.55703	-0.550296					-0.706394	-0.84944
Q2FZW1_C18	Q2FZW1	MEHVSVVVYGADVICASUVNAPTSK	SAOUHSC_00874	Uncharacterized protein	no	not assigned		-1.03523						-0.297788			-0.90809	-1.16236					-0.172766	-0.42281
Q2FXU7_C92	Q2FXU7	LINPDUK	SAOUHSC_01735	Uncharacterized protein	no	Enzyme		0.115202		-0.37783		-0.750172		-0.329041			0.240516	-0.0101126	-0.358178	-0.397481	-0.719493	-0.780851	-0.219219	-0.438864
Q2FY49_C124	Q2FY49	TLPGNAQSIGAILDQINWEEVLGTIUGDDTCLIICR	argR	Arginine repressor	no	Gene expression and Nucleic acid binding		-1.34373									-1.11982	-1.56764
Q2G0G1_C95	Q2G0G1	CEYUTTGR	adh	Alcohol dehydrogenase	no	Enzyme	Functional site	-0.211325		-0.221827		-0.860955		-0.0763487			-0.263092	-0.159557	-0.020399	-0.423255	-0.0197699	-1.70214	-0.0895897	-0.0631077
Q2FXT6_C281	Q2FXT6	NGTUMTSQGR	tgt	Queuine tRNA-ribosyltransferase	no	Gene expression and Nucleic acid binding		-0.151121		-0.674899		-0.398585		-0.201905			0.0654344	-0.367676	-0.692968	-0.656831	-0.424552	-0.372617	-0.229839	-0.17397
Q2FXH9_C155	Q2FXH9	IHMIIGTDEESDWKUTDR	SAOUHSC_01868	Putative dipeptidase SAOUHSC_01868	no	Enzyme	Functional site	-0.0998482		-0.53356		-0.303148		-0.506269			0.103256	-0.302952	-0.454901	-0.612218	-0.21501	-0.391285	-0.461496	-0.551042
Q2FYG9_C341	Q2FYG9	SDSUAVPAASIVCEHVVAFEIAK	aroC	Chorismate synthase	no	Enzyme	Functional site	-0.0331164		-0.690364		-0.629502		-0.100373			0.0278618	-0.0940946	-0.520459	-0.860269	-0.572179	-0.686824	-0.0873042	-0.113442
Q2FZ36_C124	Q2FZ36	LVGPNUPGVITADECK	sucD	Succinate--CoA ligase [ADP-forming] subunit alpha	no	Enzyme		-0.0919862		-0.809009		-0.429291		-0.124501			0.0123541	-0.196327	-0.766627	-0.851391	-0.386714	-0.471869	-0.0509059	-0.198096
Q2FVT0_C72	Q2FVT0	IUEINDVDHIDLAIDGADEVDPSLNIIK	rpiA	Ribose-5-phosphate isomerase A	yes	Enzyme		0.100892		-0.118156		-0.813616		-0.626425			0.173639	0.0281448	-0.075368	-0.160943	-0.791633	-0.8356	-0.618274	-0.634576
P95689_C356	P95689	EISSCSNUTDFQAR	serS	Serine--tRNA ligase	yes	Gene expression and Nucleic acid binding	Functional site	-0.332529		-0.909777		-0.307066		0.0535233			-0.314989	-0.350068	-0.799662	-1.01989	-0.203924	-0.410209	0.128534	-0.0214875
Q2FZ82_C886	Q2FZ82	VVDKLDDQATAYEHGDIVIEHADGEKUER	ileS	Isoleucine--tRNA ligase	yes	Gene expression and Nucleic acid binding	Functional site	-0.62171		-0.641142		-0.0263554		-0.281268			-0.489403	-0.754018	-0.756745	-0.525538	0.0903115	-0.143022	-0.454625	-0.107912
Q2FZ60_C5	Q2FZ60	QUFVTGR	rpmB	50S ribosomal protein L28	yes	Modulator/Scaffolding/Adaptor		-0.204226		0.011522		-0.589608		-0.814259			-0.0197315	-0.388721	0.0631567	-0.0401126	-0.596699	-0.582517	-0.865201	-0.763318
Q2FYQ9_C63	Q2FYQ9	SICNUPHADGR	SAOUHSC_01376	Uncharacterized protein	no	not assigned		-0.242224		-0.721985		-0.688753		-0.0603987			-0.136315	-0.348133	-0.618167	-0.825803	-0.716927	-0.660579	-0.0502515	-0.0705459
Q2FYH8_C166	Q2FYH8	LUSVIPR	nth	Endonuclease III	no	Gene expression and Nucleic acid binding		-0.681353		-0.964845				-0.0766098			-0.620224	-0.742482	-0.795909	-1.13378			-0.115613	-0.0376065
Q2FV48_C114	Q2FV48	SCELNSEAFUNK	SAOUHSC_02891	Uncharacterized protein	no	Gene expression and Nucleic acid binding								-1.74192									-1.52604	-1.9578
P0A011_C85	P0A011	NKDUGLLLAYEK	lacD	Tagatose 1,6-diphosphate aldolase	no	Enzyme		-0.306846		-0.321939		-0.462452		-0.651919			-0.0746537	-0.539037	-0.266958	-0.37692	-0.521018	-0.403885	-0.527533	-0.776306
Q2FZW2_C30	Q2FZW2	DGGDUSLIDVEDGIVK	SAOUHSC_00873	Uncharacterized protein	no	not assigned		-0.540078		-0.417913		-0.627968		-0.18201			-0.453241	-0.626914	-0.390188	-0.445637	-0.598741	-0.657195	-0.117709	-0.24631
Q2FXU5_C565	Q2FXU5	TASATULLTNAPSEVSDK	aspS	Aspartate--tRNA ligase	yes	Gene expression and Nucleic acid binding		-0.218553		-0.554023		-0.465256		-0.54556			-0.0880511	-0.349056	-0.580125	-0.527921	-0.492485	-0.438027	-0.384927	-0.706193
Q2FXP0_C268	Q2FXP0	VUGSQIETK	SAOUHSC_01796	Formamidopyrimidine-DNA glycosylase	no	Gene expression and Nucleic acid binding		-1.01173		-0.677101				-0.109871			-0.832899	-1.19057	-0.631019	-0.723182			0.0776532	-0.297396
Q2FXM8_C226	Q2FXM8	HSIVLVAEGUMTAQDCQK	pfkA	ATP-dependent 6-phosphofructokinase	yes	Enzyme	Functional site	0.268203		-1.4213		-0.582483		-0.167039			0.360083	0.176323	-1.57833	-1.26427	-0.856267	-0.308698	-0.0194782	-0.314599
Q2FVC2_C60	Q2FVC2	EIREEMKUDLIVGDK	SAOUHSC_02791	Pyrophosphohydrolase, putative	yes	not assigned		-0.165995		-1.1855		-0.563045		0.00311929			-0.111527	-0.220463	-1.0146	-1.35639	-0.445893	-0.680197	0.0123541	-0.00611554
Q2FYQ9_C61	Q2FYQ9	SIUNCPHADGR	SAOUHSC_01376	Uncharacterized protein	no	not assigned		-0.30076		-0.931525		-0.74721		0.0497191			-0.303832	-0.297688	-0.713811	-1.14924	-0.848791	-0.645629	0.086512	0.0129262
Q2G2C1_C345	Q2G2C1	DITTLGYAIQUR	SAOUHSC_01064	Pyruvate carboxylase	no	Enzyme		-0.422839		-0.288772		-0.502843		-0.766729			-0.286163	-0.559515	-0.0580373	-0.519507	-1.02204	0.0163537	-0.665889	-0.867568
Q2FZJ4_C44	Q2FZJ4	VVVLDPSEDUPCR	purK	N5-carboxyaminoimidazole ribonucleotide synthase	no	Enzyme								-1.98777									-1.90142	-2.07412
Q2G1S3_C343	Q2G1S3	IUTAYELDGK	purA	Adenylosuccinate synthetase	no	Enzyme						-2.0201									-2.36038	-1.67983
Q2FZZ6_C210	Q2FZZ6	SMFGGYDELMEPVUNTFTAK	SAOUHSC_00838	Uncharacterized protein	no	not assigned		-0.330331		-1.00132		-0.639407		-0.0751978			-0.119463	-0.541198	-0.941725	-1.06091	-0.627092	-0.651722	0.0710762	-0.221472
Q2FZ65_C36	Q2FZ65	DKNEDAGGIFYNQTNQQLLVLUDGMGGHK	SAOUHSC_01186	Uncharacterized protein	no	Enzyme		-0.290646		0.123416		-0.697384		-1.22153			-0.283913	-0.297378	0.226632	0.0201999	-0.554888	-0.83988	-1.01637	-1.4267
Q2FXQ7_C16	Q2FXQ7	CSFUGKDQDQVK	clpX	ATP-dependent Clp protease ATP-binding subunit ClpX	no	Enzyme		-0.804088		-1.01126		0.0527928		-0.338909			-0.683077	-0.925099	-0.964468	-1.05805	-0.417675	0.523261	-0.298603	-0.379215
Q2G1S3_C404	Q2G1S3	ISELUNVQISIFSVGPDR	purA	Adenylosuccinate synthetase	no	Enzyme		-0.904229		-0.431023		-0.593737		-0.256873			-0.761202	-1.04726	-0.0190388	-0.843008	-0.470589	-0.716884	-0.331409	-0.182338
Q2G1X6_C136	Q2G1X6	HIITGVCETDFSGYPDUR	queC	7-cyano-7-deazaguanine synthase	no	not assigned		-0.650021						-1.60078			-0.522551	-0.777492					-1.83892	-1.36264
Q2G282_C102	Q2G282	FDFNTHNHYHIIUEQCGK	perR	Peroxide-responsive repressor PerR	no	Gene expression and Nucleic acid binding	Functional site	-0.413439		-1.20495		-0.528402		-0.333271			-0.388374	-0.438503	-1.15451	-1.25539	-0.663625	-0.393179	-0.311524	-0.355018
Q2FXT6_C308	Q2FXT6	FADDLRPLDENCDUYTCQNYSR	tgt	Queuine tRNA-ribosyltransferase	no	Gene expression and Nucleic acid binding	Functional site	-1.30081		-1.14888				-0.053519			-1.22132	-1.3803	-1.12092	-1.17684			-0.0145287	-0.0925094
Q2FXI8_C167	Q2FXI8	GVASSGMIUSMK	SAOUHSC_01858	Phenylalanine--tRNA ligase beta subunit	no	Gene expression and Nucleic acid binding		-0.958973		-0.565515		-0.530701		-0.483914			-0.870169	-1.04778	-0.525514	-0.605516	-0.535944	-0.525457	-0.49842	-0.469408
Q2G0G1_C89	Q2G0G1	VSIAWMFESUGR	adh	Alcohol dehydrogenase	no	Enzyme	Functional site	-0.647668		-0.570289		-0.761344		-0.572672			-0.558538	-0.736797	-0.525268	-0.615309	-0.725852	-0.796836	-0.510498	-0.634845
Q2FZ65_C103	Q2FZ65	GMGTTUVCALVFEK	SAOUHSC_01186	Uncharacterized protein	no	Enzyme		-0.279647		0.140647		-0.87213		-1.55821			-0.141908	-0.417386	-0.00747808	0.288772	-0.874084	-0.870176	-1.60007	-1.51635
Q2G274_C421	Q2G274	LADUSSK	gyrB	DNA gyrase subunit B	yes	Gene expression and Nucleic acid binding		-0.181851				-1.71468		-0.775941			-0.223927	-0.139774		-1.20123	-1.63464	-1.79471	-0.733344	-0.818539
Q2FWY1_C118	Q2FWY1	AEPVGUTATILYK	ppaC	Probable manganese-dependent inorganic pyrophosphatase	yes	Enzyme		-0.585003		-1.08206		-0.836923		-0.222755			-0.52394	-0.646067	-1.02157	-1.14254	-0.881188	-0.792657	-0.161508	-0.284001
Q2FZZ6_C173	Q2FZZ6	QTITUTDYKYDEDVLALWNK	SAOUHSC_00838	Uncharacterized protein	no	not assigned		-0.683583		-1.09899		-0.813959		-0.131871			-0.590267	-0.776899	-1.02221	-1.17576	-0.9281	-0.699818	-0.0663065	-0.197435
Q2G0K5_C20	Q2G0K5	KUGEVATQSAFK	SAOUHSC_00555	Hydrolase, haloacid dehalogenase-like	no	Enzyme		-0.538552		-1.01207		-1.02526		-0.205307			-0.557348	-0.519756	-0.947918	-1.07622	-1.14048	-0.910041	0.0712135	-0.481827
Q2FXK7_C102	Q2FXK7	TQIVADVHQFEGHIAUDANSK	SAOUHSC_01828	GAF domain protein	no	not assigned		-1.18185		-1.54075				-0.096303			-1.00807	-1.35563	-1.9161	-1.1654			-0.401997	0.209391
Q2G0N5_C822	Q2G0N5	LVDVAQDVIVREEDUGTDR	rpoC	DNA-directed RNA polymerase subunit beta'	yes	Gene expression and Nucleic acid binding		-0.543848		-1.17822		-1.13757					-0.355867	-0.731829	-1.16657	-1.18988	-0.97078	-1.30436
Q2FX98_C87	Q2FX98	NHUAYPNHAPTSDIYWNNIETR	SAOUHSC_01979	Uncharacterized protein	yes	Gene expression and Nucleic acid binding		-1.419		-1.27819		-0.281342		0.0966401			-1.37958	-1.45843	-1.20516	-1.35122	-0.131961	-0.430723	0.0709388	0.122341
Q2FZW1_C15	Q2FZW1	MEHVSVVVYGADVIUASCVNAPTSK	SAOUHSC_00874	Uncharacterized protein	no	not assigned		-0.95998		-1.66073				-0.281499			-0.874111	-1.04585	-1.41296	-1.9085			-0.266507	-0.296492
Q2G0N5_C896	Q2G0N5	SAFTUNAR	rpoC	DNA-directed RNA polymerase subunit beta'	yes	Gene expression and Nucleic acid binding		-0.464858		-1.02057		-0.889446		-0.557854			-0.382796	-0.54692	-1.02084	-1.02031	-1.25642	-0.522468	-0.509081	-0.606628
P0A0B7_C168	P0A0B7	KNPGEVUPAK	ahpC	Alkyl hydroperoxide reductase C	no	Enzyme		-0.845308		-1.31158		-0.694214		-0.157168			-0.754415	-0.936201	-1.23997	-1.38319	-0.709316	-0.679111	-0.144759	-0.169576
Q2G282_C105	Q2G282	FDFNTHNHYHIICEQUGK	perR	Peroxide-responsive repressor PerR	no	Gene expression and Nucleic acid binding	Functional site	-0.432154		-1.05037		-0.921703		-0.654255			-0.252552	-0.611755	-1.01104	-1.0897	-0.967363	-0.876043	-0.863914	-0.444596
Q2G0K5_C32	Q2G0K5	AUGLTEPSSK	SAOUHSC_00555	Hydrolase, haloacid dehalogenase-like	no	Enzyme		-0.685164		-1.1579		-0.983846		-0.275313			-0.626469	-0.743859	-1.08516	-1.23063	-0.95115	-1.01654	-0.258063	-0.292564
Q2FY35_C379	Q2FY35	HFEIPYKQYUK	gcvPB	Probable glycine dehydrogenase (decarboxylating) subunit 2	no	Enzyme		-0.633533		-1.17161		-1.03653		-0.332099			-0.518489	-0.748577	-1.15369	-1.18954	-0.636202	-1.43686	-0.379691	-0.284507
Q2FWM2_C38	Q2FWM2	QIGGAPUNVACTVQK	SAOUHSC_02267	Fructokinase, putative	no	Enzyme		-1.0852		-0.787125				-1.31691			-1.09813	-1.07227	-0.676734	-0.897517			-1.68924	-0.944582
Q2FYU6_C9	Q2FYU6	VNVTLAUTECGDR	rpmG1	50S ribosomal protein L33 1	no	Modulator/Scaffolding/Adaptor		-0.630294		-1.50413		-0.832893		-0.239999			-0.62286	-0.637728	-1.46112	-1.54713	-0.770639	-0.895147	-0.365662	-0.114335
Q2FUW0_C122	Q2FUW0	EKUIEAPGYR	SAOUHSC_02991	Uncharacterized protein	no	not assigned		-0.681936		-1.16488		-1.04427		-0.458065			-0.556521	-0.807351	-1.04388	-1.28588	-1.08479	-1.00376	-0.40947	-0.50666
Q2G282_C145	Q2G282	MEIYGVCKEUQDK	perR	Peroxide-responsive repressor PerR	no	Gene expression and Nucleic acid binding	Functional site	-1.29882		-1.87104				-0.486504			-1.18475	-1.41288	-1.8636	-1.87848			-0.482755	-0.490253
Q2G101_C187	Q2G101	VENUKPYIIE	SAOUHSC_00359	Phosphoglycerate mutase family protein	no	Enzyme		-1.71272		-1.4141		-0.239895		-0.368956			-1.56205	-1.86339	-1.59009	-1.2381	-0.0784418	-0.401349	-0.323931	-0.41398
O05204_C335	O05204	GVAFUPHCDGPLFENK	ahpF	Alkyl hydroperoxide reductase subunit F	no	Enzyme		-1.76813		-1.31228		-0.25441		-0.516653			-1.68557	-1.85069	-1.23933	-1.38522	-0.46957	-0.0392511	-0.472109	-0.561196
Q2FWY1_C158	Q2FWY1	SPTUTQQDVK	ppaC	Probable manganese-dependent inorganic pyrophosphatase	yes	Enzyme		-1.17769		-1.50461		-0.934047		-0.265777			-1.07051	-1.28486	-1.45139	-1.55784	-0.920844	-0.94725	-0.222481	-0.309073
Q2G101_C25	Q2G101	SYFUGQLDVPLTDTGTK	SAOUHSC_00359	Phosphoglycerate mutase family protein	no	Enzyme		-1.6097		-1.01589		-1.1487		-0.237404			-1.01584	-2.20357	-1.00743	-1.02436	-1.09983	-1.19757	-0.248416	-0.226392
Q2G101_C44	Q2G101	SADDLUDYFKEK	SAOUHSC_00359	Phosphoglycerate mutase family protein	no	Enzyme		-1.41209		-1.94125		-0.984966		0.0430905			-1.28135	-1.54284	-1.8133	-2.06921	-1.22135	-0.748578	0.0543623	0.0318186
Q2FXA4_C272	Q2FXA4	NFIYTPVGFVCEHLEVLYDNDYEUK	hemH	Ferrochelatase	no	Enzyme		-1.19536		-1.83687		-1.28988					-1.14086	-1.24986	-1.81868	-1.85507	-1.18338	-1.39638
Q2FXA4_C276	Q2FXA4	VVUDDIGANYYRPK	hemH	Ferrochelatase	no	Enzyme		-1.18272		-1.25802		-1.30618		-0.702395			-1.15717	-1.20826	-1.00488	-1.51116	-1.24291	-1.36945	-0.730177	-0.674614
Q2FX12_C8	Q2FX12	VDVAFVULGNICR	ptpA	Low molecular weight protein-tyrosine-phosphatase PtpA	no	Enzyme	Functional site	-2.97639		-2.38352				-1.31681			-2.96002	-2.99276	-2.81868	-1.94836			-1.34534	-1.28828
Q2FYU6_C12	Q2FYU6	VNVTLACTEUGDR	rpmG1	50S ribosomal protein L33 1	no	Modulator/Scaffolding/Adaptor		-2.3893		-3.03655		-2.27082		-1.19794			-2.08164	-2.69696	-3.18468	-2.88843	-2.50766	-2.03397	-0.852469	-1.54341

## Sheet: Concentration dependence
Identifier	Leading razor protein	Sequence	Gene name	Name	Essential?	GO class	Functional site	Median % competition 100 mM DGS	Median % competition 50 mM DGS	Median % competition 20 mM DGS	Median % competition 10 mM DGS	EC50 in mM	95% Confidence Interval EC50 in mM	R2
Q2G115_C101	Q2G115	EVDAIUQVVR	ychF	Ribosome-binding ATPase YchF	no	Modulator/Scaffolding/Adaptor		89.7635	88.1646	81.5862	66.0232	5.223	3.382 to 7.508	0.8898
Q2G243_C99	Q2G243	STLLLQIUASLSQK	radA	DNA repair protein RadA	no	Gene expression and Nucleic acid binding		90.7793	84.5074	69.4495	62.3761	7.361	4.837 to 10.61	0.9056
Q2FVI7_C265	Q2FVI7	SVNQIPGSGAAGGMGAALLAFUETTLTK	SAOUHSC_02723	Glycerate kinase, putative	no	Enzyme		90.7629	87.2586	79.2293	51.9946	7.552	4.574 to 11.59	0.92
Q2G1Z4_C439	Q2G1Z4	AQSLIMGUYGIGISR	proS	Proline--tRNA ligase	yes	Gene expression and Nucleic acid binding		86.2174	85.6738	73.6105	54.1367	8.273	5.652 to 11.63	0.9316
Q2FY27_C252	Q2FY27	VANYIGYLUSIISVTSNPK	SAOUHSC_01646	Glucokinase, putative	no	Enzyme		84.0396	86.2198	75.3677	51.809	8.476	4.797 to 13.77	0.8675
Q2FY27_C237	Q2FY27	AGDQFUIFITEK	SAOUHSC_01646	Glucokinase, putative	no	Enzyme		83.2604	85.7235	74.6777	46.6671	9.544	5.005 to 16.54	0.8582
Q2FZ17_C141	Q2FZ17	TADGEPVVYULDK	SAOUHSC_01254	Uncharacterized protein	no	Gene expression and Nucleic acid binding		88.7303	85.9882	75.6479	43.6443	9.593	5.177 to 16.28	0.8984
Q2G038_C250	Q2G038	QAGQPFIDYVIUSTQTFNAQVLK	SAOUHSC_00788	Gluconeogenesis factor	yes	not assigned		88.6549	84.2855	70.2648	47.9083	9.841	7.704 to 12.39	0.9773
O07325_C203	O07325	ELGAUVIDIGEDVTQVAFYER	ftsA	Cell division protein FtsA	yes	not assigned		83.7944	80.4893	69.7834	47.6889	10.66	6.927 to 15.78	0.9145
Q2G1S4_C254	Q2G1S4	MIUSSGNVDSNR	SAOUHSC_00018	Replicative DNA helicase	yes	Gene expression and Nucleic acid binding		89.9616	84.726	68.3931	43.4616	10.82	7.917 to 14.48	0.9699
Q2G0R0_C480	Q2G0R0	IUGLLGGR	ftsH	ATP-dependent zinc metalloprotease FtsH	no	Enzyme		86.4648	80.6914	66.7233	47.4458	11.04	8.843 to 13.64	0.9783
Q2FXM9_C8	Q2FXM9	IVUTIGPASESEEMIEK	pyk	Pyruvate kinase	yes	Enzyme		88.6473	87.0835	71.5083	37.0257	11.3	5.593 to 20.72	0.8908
Q2FXY7_C383	Q2FXY7	EFGIELIATAPSVIYQUVLR	lepA	Elongation factor 4	no	not assigned		85.6585	78.701	63.1822	47.0798	12.07	9.687 to 14.91	0.9774
Q2G084_C36	Q2G084	NINQGIGEVTTALSSIUK	SAOUHSC_00736	Putative lipid kinase SAOUHSC_00736	no	Enzyme		79.3609	76.4461	66.2607	47.755	12.13	6.568 to 21.00	0.7788
Q2FYG1_C250	Q2FYG1	LGADPMTFLGLGGIGDLIVTUTSTHSR	gpsA	Glycerol-3-phosphate dehydrogenase [NAD(P)+]	no	Enzyme		90.184	85.4502	64.416	39.1689	12.21	8.237 to 17.58	0.9591
Q53727_C456	Q53727	VTQEULNFYELIQSLIK	pcrA	ATP-dependent DNA helicase PcrA	yes	Gene expression and Nucleic acid binding		76.9485	69.3929	65.5723	53.2073	12.27	4.078 to 30.28	-0.179
Q2FXX2_C98	Q2FXX2	NIDISNDEIYNLMIYQLGALQGFUR	SAOUHSC_01708	UPF0271 protein SAOUHSC_01708	no	Enzyme		80.9622	77.0317	64.6335	46.4698	12.52	7.823 to 19.31	0.8819
Q2G1K9_C602	Q2G1K9	IGMPENATFIUIPTTSGTGSEVTPFAVITDSETNVK	SAOUHSC_00113	Aldehyde-alcohol dehydrogenase	no	Enzyme		82.7471	71.1648	60.6929	51.0437	13.04	6.705 to 23.64	0.7179
Q2FZG9_C297	Q2FZG9	HELLILUTGSQGEPMAALSR	rnj1	Ribonuclease J 1	yes	Gene expression and Nucleic acid binding		86.0959	78.0393	66.7749	38.0908	13.26	8.758 to 19.54	0.944
Q2G0D6_C190	Q2G0D6	DIYESMEEIADKUQIVANNFETIIMK	SAOUHSC_00669	Uncharacterized protein	no	not assigned		76.4215	71.5982	62.2202	49.4656	13.62	5.867 to 28.51	0.429
Q2FY04_C100	Q2FY04	ELUDDDMPVYMTNHK	SAOUHSC_01670	Cytidine deaminase	no	Enzyme		85.3176	58.1119	63.4376	51.8428	14.09	3.531 to 42.69	0.1642
Q2G255_C7	Q2G255	IGITUYPSMGGSGIIATELGIK	SAOUHSC_01475	Uncharacterized protein	no	Enzyme		76.2348	77.4167	61.2056	43.578	14.3	7.864 to 24.74	0.8127
Q2FZ17_C175	Q2FZ17	EQSNHNIUYADTEIEAVNYEPR	SAOUHSC_01254	Uncharacterized protein	no	Gene expression and Nucleic acid binding		86.1232	80.9863	65.642	30.2729	14.68	7.727 to 26.35	0.9039
Q2G112_C97	Q2G112	VFVTEVVUDSVQFLEPK	SAOUHSC_00349	Single-stranded DNA-binding protein	yes	Gene expression and Nucleic acid binding		92.3659	84.4733	55.0016	34.3852	14.93	8.959 to 23.95	0.9432
Q2FXB7_C50	Q2FXB7	IIUGILQQDSGEIK	SAOUHSC_01948	ABC transporter domain protein	no	not assigned		78.8324	77.0918	64.8866	34.094	15.39	8.369 to 27.05	0.8757
Q2FW16_C84	Q2FW16	FDENAUVIIR	rplN	50S ribosomal protein L14	yes	Modulator/Scaffolding/Adaptor		82.2022	78.6775	65.0007	29.283	15.8	8.133 to 29.12	0.8872
Q2FZ59_C30	Q2FZ59	AVEUYGIVGMASR	SAOUHSC_01192	Uncharacterized protein	no	not assigned		80.5026	72.8393	54.4677	43.8596	16.21	10.79 to 23.88	0.9156
Q2FY52_C175	Q2FY52	LPFVUVIINNK	SAOUHSC_01613	2-oxoisovalerate dehydrogenase, E1 component, alpha subunit, putative	no	Enzyme		78.5483	76.5001	62.0306	29.3133	17.33	9.362 to 30.91	0.8878
Q2FVI4_C61	Q2FVI4	NNGDLAGILGLUIPELDGK	SAOUHSC_02726	Positive transcriptional activator, putative	no	not assigned		83.5583	63.1976	49.7453	50.674	17.34	6.589 to 40.98	0.5457
Q2G115_C306	Q2G115	QGMTAPQUAGIIHTDFER	ychF	Ribosome-binding ATPase YchF	no	Modulator/Scaffolding/Adaptor		77.593	71.3625	54.4211	41.7624	17.45	10.94 to 27.22	0.8817
Q2FZG9_C191	Q2FZG9	MAQLGEEGVLULLSDSTNSLVPDFTLSER	rnj1	Ribonuclease J 1	yes	Gene expression and Nucleic acid binding		84.5861	76.0297	53.6602	34.4714	17.55	15.49 to 19.85	0.9949
Q2FXM9_C410	Q2FXM9	QUSIVWGVQPVVK	pyk	Pyruvate kinase	yes	Enzyme		84.9036	78.6664	55.0986	30.0854	17.66	12.36 to 24.88	0.966
Q2FVI7_C80	Q2FVI7	YTVIVNDPLMRPIEAUYAR	SAOUHSC_02723	Glycerate kinase, putative	no	Enzyme		81.7138	72.428	55.7347	35.6702	17.83	14.55 to 21.77	0.9838
Q2FYQ9_C23	Q2FYQ9	GFNYYQSEUVINLK	SAOUHSC_01376	Uncharacterized protein	no	not assigned		78.6936	79.5846	52.2087	31.405	18.74	12.23 to 28.26	0.9446
Q2FV62_C235	Q2FV62	GAVFVNUAR	SAOUHSC_02875	D-lactate dehydrogenase, putative	no	Enzyme		82.2986	65.7881	51.9008	41.5319	18.78	11.74 to 29.44	0.896
Q2FVT8_C225	Q2FVT8	VNUVAPGPFWSPLQISGGQPQSK	SAOUHSC_02604	Uncharacterized protein	no	Enzyme		80.8523	73.6701	53.088	30.3798	19.74	15.52 to 24.99	0.9811
Q2FYG9_C148	Q2FYG9	VAVGALUK	aroC	Chorismate synthase	no	Enzyme		61.7348	75.5154	66.1417	25.5572	19.83	4.534 to 75.27	0.4405
Q2FVV9_C386	Q2FVV9	QVIGTNNVDNUSR	SAOUHSC_02582	Putative formate dehydrogenase SAOUHSC_02582	no	Enzyme		83.1818	73.3414	43.4802	37.9299	20.28	14.00 to 29.05	0.9546
Q2FYP0_C224	Q2FYP0	VTATUAR	asd	Aspartate-semialdehyde dehydrogenase	no	Enzyme	Functional site	77.9197	59.4362	48.5168	46.3795	20.92	8.155 to 50.03	0.451
Q2FZ31_C225	Q2FZ31	YFEGUMPFEVMAER	trmFO	Methylenetetrahydrofolate--tRNA-(uracil-5-)-methyltransferase TrmFO	no	Gene expression and Nucleic acid binding		83.3992	71.7537	52.4579	25.1023	21.3	14.89 to 30.22	0.9657
Q2G1X7_C40	Q2G1X7	CSWUDSAFTWDGSAK	queE	7-carboxy-7-deazaguanine synthase	no	Enzyme	Functional site	77.6784	73.5514	58.0626	20.576	21.34	10.39 to 42.57	0.8735
Q2G0T5_C493	Q2G0T5	SSIESVVUNIVNK	dnaX	DNA polymerase III subunit gamma/tau	yes	Gene expression and Nucleic acid binding		78.1512	80.6724	50.0221	22.4014	21.4	11.07 to 40.29	0.9008
Q2G1K9_C493	Q2G1K9	VMIVUDPGMVEFGYTK	SAOUHSC_00113	Aldehyde-alcohol dehydrogenase	no	Enzyme		78.5385	68.3462	51.8135	31.9577	21.41	16.74 to 27.29	0.976
Q2G0I6_C304	Q2G0I6	YLUDIAEK	SAOUHSC_00579	Phosphomevalonate kinase	yes	Enzyme		81.8163	65.5406	44.7091	40.0713	21.58	13.53 to 33.87	0.9101
Q2G1D7_C29	Q2G1D7	YILFTQGULLR	pflA	Pyruvate formate-lyase-activating enzyme	no	Enzyme	Functional site	83.5498	77.902	49.6377	21.0738	21.61	12.05 to 37.92	0.9271
Q2FY71_C35	Q2FY71	AEQIIDUAVENGITYFDTADMYDK	SAOUHSC_01594	Uncharacterized protein	no	not assigned		79.8545	68.1371	45.2708	37.4348	21.8	15.80 to 29.86	0.9573
Q2FXX2_C221	Q2FXX2	EVTLQADTIUVHGDGEHALLFVSK	SAOUHSC_01708	UPF0271 protein SAOUHSC_01708	no	Enzyme		77.9374	76.9321	44.8136	30.0322	21.96	14.72 to 32.44	0.9523
Q2G1D7_C36	Q2G1D7	CLYUHNPDTWK	pflA	Pyruvate formate-lyase-activating enzyme	no	Enzyme	Functional site	76.6136	74.2524	59.6442	15.4973	22.19	8.564 to 55.02	0.8157
Q2FXW5_C341	Q2FXW5	SPFDFUGLVLDYNEDTK	SAOUHSC_01716	Uncharacterized protein	no	Enzyme		78.3516	71.1676	53.0291	24.8296	22.25	14.74 to 33.28	0.9494
Q2G0S3_C100	Q2G0S3	EGTTIVVUGDTPLITK	glmU	Bifunctional protein GlmU	yes	Enzyme	Functional site	80.1831	67.6237	46.9179	33.9317	22.32	18.90 to 26.33	0.9892
Q2FWY9_C186	Q2FWY9	QPAAYUGVVGMK	gatA	Glutamyl-tRNA(Gln) amidotransferase subunit A	yes	Enzyme		83.169	67.5629	49.1441	25.9797	23.22	18.31 to 29.38	0.9836
Q2FUW0_C139	Q2FUW0	ESPVHFEUEYVQTIR	SAOUHSC_02991	Uncharacterized protein	no	not assigned		84.5204	78.329	45.8981	17.5336	23.28	11.51 to 45.90	0.9066
Q2FZU5_C111	Q2FZU5	GGIVUDPR	SAOUHSC_00895	Glutamate dehydrogenase	no	Enzyme		77.2393	65.3419	45.4268	36.4214	23.39	16.18 to 33.56	0.9375
Q2G1K9_C258	Q2G1K9	TFDNGMIUASEQVVVIDK	SAOUHSC_00113	Aldehyde-alcohol dehydrogenase	no	Enzyme		82.1362	74.8543	44.9116	23.1888	23.49	15.51 to 35.30	0.9582
Q2G0Y9_C176	Q2G0Y9	LEEAGLTVSSLUK	xpt	Xanthine phosphoribosyltransferase	no	Enzyme		80.0913	67.4616	46.4775	30.3886	23.53	22.24 to 24.89	0.9989
Q2G1G4_C269	Q2G1G4	FVALNYHAILDUITQSK	SAOUHSC_00160	Uncharacterized protein	no	Gene expression and Nucleic acid binding		80.9463	40.0125	56.3181	46.5722	23.55	2.934 to 135.9	-0.2115
Q2G0D6_C152	Q2G0D6	EFETNUDGILR	SAOUHSC_00669	Uncharacterized protein	no	not assigned		76.0079	60.6903	46.3913	38.5462	24.15	13.46 to 42.61	0.8129
Q2FY27_C185	Q2FY27	SGUIETVASATGVVNLVNFYYPK	SAOUHSC_01646	Glucokinase, putative	no	Enzyme		79.5912	63.7522	41.4285	37.1036	24.58	15.95 to 37.54	0.924
Q2FZ04_C50	Q2FZ04	AAANIGLEPEEVAIITGIGUSGR	SAOUHSC_01267	Uncharacterized protein	no	Enzyme		79.7958	66.8881	46.7123	25.5611	25.05	21.25 to 29.50	0.9916
Q2FZF5_C79	Q2FZF5	VHQFSGLLVDYUEQVGAK	coaD	Phosphopantetheine adenylyltransferase	yes	Enzyme	Functional site	75.827	55.5564	50.3868	35.7724	25.32	12.32 to 50.96	0.7234
Q2FVV9_C390	Q2FVV9	YUQAPATK	SAOUHSC_02582	Putative formate dehydrogenase SAOUHSC_02582	no	Enzyme		80.5298	66.0188	44.0918	27.3183	25.57	24.25 to 26.96	0.9991
Q2FZP4_C112	Q2FZP4	TLMAVDSAVMVIDUAK	prfC	Peptide chain release factor 3	no	Gene expression and Nucleic acid binding		76.1813	73.1907	43.1017	22.6759	25.96	17.19 to 39.03	0.9535
Q2FZR9_C220	Q2FZR9	ALSTNDDIETAUR	fabF	3-oxoacyl-[acyl-carrier-protein] synthase 2	yes	Enzyme		85.108	73.3424	37.7681	20.9085	26.19	15.10 to 44.93	0.9371
Q2FXW5_C118	Q2FXW5	TGATGIIVADPLIIETUK	SAOUHSC_01716	Uncharacterized protein	no	Enzyme		75.5604	66.8087	49.1445	20.9431	26.54	17.38 to 40.41	0.9463
Q2G0L9_C109	Q2G0L9	GGUSGSLMNLLQQSNFNHR	tadA	tRNA-specific adenosine deaminase	no	Gene expression and Nucleic acid binding		78.6327	56.0422	42.4095	36.0545	27.49	15.32 to 48.79	0.8497
Q2G1K9_C844	Q2G1K9	MAELAFEDQUTTANPK	SAOUHSC_00113	Aldehyde-alcohol dehydrogenase	no	Enzyme		80.7898	64.2105	36.7841	22.8812	30.13	23.62 to 38.42	0.9841
Q2G099_C193	Q2G099	VGDYUENRI	SAOUHSC_00722	Para-aminobenzoate synthase, glutamine amidotransferase, component II, putative	no	Enzyme		79.1827	62.231	46.9031	11.871	30.75	16.24 to 58.36	0.9091
Q2G1D8_C691	Q2G1D8	NLTSMLDGYAMQUGHHLNINVFNR	pflB	Formate acetyltransferase	no	Enzyme		81.6839	65.659	30.8023	24.8353	31.05	19.68 to 48.88	0.9488
Q2G0I6_C324	Q2G0I6	TSGAGGGDUGITIINK	SAOUHSC_00579	Phosphomevalonate kinase	yes	Enzyme		81.9855	64.3643	32.4789	23.7589	31.13	21.07 to 45.93	0.9619
Q2FV10_C380	Q2FV10	DGLFFEPTVITNUDTSMR	SAOUHSC_02933	Betaine aldehyde dehydrogenase	no	Enzyme		78.1671	57.2616	40.543	22.556	32.31	25.97 to 40.21	0.985
Q2G1Z3_C260	Q2G1Z3	TGKPLLVTYDLUR	SAOUHSC_00652	Iron compound ABC transporter, ATP-binding protein	no	not assigned		78.4326	59.4322	39.2397	21.0488	32.34	27.01 to 38.72	0.9905
Q2FZU1_C116	Q2FZU1	TNSVGIAHGUTGK	argG	Argininosuccinate synthase	no	Enzyme	Functional site	80.5377	62.6345	31.7279	21.8905	33.15	23.14 to 47.51	0.9674
Q2G1B9_C38	Q2G1B9	PLYMSIUAADQR	tarJ	Ribulose-5-phosphate reductase 1	yes	Enzyme	Functional site	77.7715	69.3625	32.0763	14.5948	33.35	18.59 to 60.16	0.9275
Q2FX00_C94	Q2FX00	EAIEDGMPGLTIUGGYQFLGK	SAOUHSC_02106	Uncharacterized protein	yes	Enzyme		78.0877	66.8443	34.6853	12.1763	33.97	19.37 to 59.97	0.933
Q2G1Z8_C1030	Q2G1Z8	GUTGVKR	polC	DNA polymerase III PolC-type	yes	Gene expression and Nucleic acid binding		81.1551	60.4344	35.773	16.0878	34.01	22.88 to 50.66	0.9632
Q2FZJ0_C522	Q2FZJ0	GMAEAUDILK	purL	Phosphoribosylformylglycinamidine synthase subunit PurL	no	Enzyme		75.451	68.7092	35.6138	10.695	34.13	18.08 to 65.14	0.915
Q2G1C4_C315	Q2G1C4	GHEINVUTMQDIVQAFEMDLSTSWGK	tarJ'	Ribulose-5-phosphate reductase 2	no	Enzyme		77.3152	42.8624	42.0378	35.1894	34.32	12.25 to 95.71	0.5687
Q2FXW9_C234	Q2FXW9	IATVUKFDLPK	SAOUHSC_01711	Uncharacterized protein	no	not assigned		75.8697	59.5454	36.8997	20.5567	34.32	30.86 to 38.17	0.9966
Q2FZR9_C165	Q2FZR9	GPNGATVTAUATGTNSIGEAFK	fabF	3-oxoacyl-[acyl-carrier-protein] synthase 2	yes	Enzyme	Functional site	88.9268	69.7044	22.1473	8.37399	35.31	11.76 to 109.3	0.8328
Q2G039_C262	Q2G039	SQLVIAIGUTGGQHR	SAOUHSC_00787	Nucleotide-binding protein SAOUHSC_00787	no	not assigned		75.2363	51.9755	35.8378	29.7921	35.52	22.43 to 56.33	0.9147
Q2G1S1_C33	Q2G1S1	VDMIAUEDTR	rsmI	Ribosomal RNA small subunit methyltransferase I	no	Gene expression and Nucleic acid binding		76.6228	69.6989	21.8923	19.9967	36.1	16.71 to 79.24	0.8775
Q2G1K9_C431	Q2G1K9	VLVNTPSAVGGIGDMYNELIPSLTLGUGSYGR	SAOUHSC_00113	Aldehyde-alcohol dehydrogenase	no	Enzyme		79.5055	64.6704	30.201	12.5114	36.15	20.33 to 64.91	0.9317
Q2FVL8_C325	Q2FVL8	VSGUDLYSAGQIVENAEIK	SAOUHSC_02684	Assimilatory nitrite reductase [NAD(P)H], large subunit, putative	no	Enzyme		76.4712	60.7259	31.0094	19.0947	36.63	27.67 to 48.61	0.979
Q2G243_C378	Q2G243	AVDGLDUYIGEVGLTGEVR	radA	DNA repair protein RadA	no	Gene expression and Nucleic acid binding		75.2314	54.9233	30.6261	28.7355	36.89	24.47 to 55.76	0.9404
Q2FZ13_C226	Q2FZ13	VVEHPDLFVETSTUTMEDFDYIIELR	SAOUHSC_01258	Uncharacterized protein	no	not assigned		75.1558	53.05	31.5261	26.4624	38.28	27.13 to 54.15	0.9585
Q2FV10_C289	Q2FV10	NPNIIFDDADFELAVDQALNGGYFHAGQVUSAGSR	SAOUHSC_02933	Betaine aldehyde dehydrogenase	no	Enzyme		75.8578	51.6312	29.7396	30.1343	38.29	22.37 to 65.92	0.8974
Q2FY43_C372	Q2FY43	IESAUYTNYTIPPYYDSMVAK	SAOUHSC_01623	Acetyl-CoA carboxylase, biotin carboxylase	yes	Enzyme		77.7763	60.7537	23.95	15.5787	40.44	23.36 to 71.00	0.9336
Q2G1T3_C54	Q2G1T3	ATNPEQLFAAGYASUFNGAFDLILK	SAOUHSC_00831	Organic hydroperoxide resistance protein-like	no	not assigned		84.7748	81.8626	2.94788	0.244336	41.19	5.947 to 442.2	0.6737
Q2FVQ5_C63	Q2FVQ5	LAQPGEESSNVWNNAGTGHSALUELNYTK	mqo	Probable malate:quinone oxidoreductase	no	Enzyme		79.5611	63.14	24.2077	5.01881	41.76	18.08 to 101.2	0.8792
Q2G078_C403	Q2G078	MSNLUTEIFQLQETSIINDYGIEDEIK	SAOUHSC_00742	Ribonucleoside-diphosphate reductase	yes	Enzyme		75.7164	54.8671	24.3602	22.0822	42.12	27.57 to 64.87	0.9504
Q2G1C4_C229	Q2G1C4	IDHAFEUVGGK	tarJ'	Ribulose-5-phosphate reductase 2	no	Enzyme		75.0821	51.2466	37.8196	7.79923	42.82	23.80 to 78.75	0.9186
Q2G0M8_C113	Q2G0M8	GTEAAIAYQSGFNUNMAAISAVMNK	SAOUHSC_00532	Uncharacterized protein	no	not assigned		78.0981	41.8561	26.5234	34.2459	43.05	16.04 to 119.6	0.6977
Q2G1J4_C258	Q2G1J4	VNIHQPGPGVGGHULAVDPYFIIAK	SAOUHSC_00128	Cap5O protein/UDP-N-acetyl-D-mannosaminuronic acid dehydrogenase	no	Enzyme		80.2161	61.7587	17.0372	11.3169	43.41	18.44 to 107.6	0.8703
Q2FY55_C52	Q2FY55	QDGTTLVMINSVUGCAGGIAR	SAOUHSC_01610	UPF0403 protein SAOUHSC_01610	no	not assigned		76.5006	65.5398	10.1969	10.0698	46.68	15.84 to 155.2	0.8116
Q2FV16_C62	Q2FV16	NNAGTGHAALUELNYTVLQPDGSIDIEK	mqo	Probable malate:quinone oxidoreductase	no	Enzyme		75.6913	57.7786	23.4152	1.95091	47.9	21.66 to 113.0	0.8849
Q2G0S2_C173	Q2G0S2	DDPNINPEEUVVVSPDHGGVTR	prs	Ribose-phosphate pyrophosphokinase	yes	Enzyme		75.8094	48.068	22.7189	18.4429	48.39	30.24 to 78.73	0.9417
Q7X2S2_C190	Q7X2S2	NIVIAUGGGGIPVIK	arcC2	Carbamate kinase 2	no	Enzyme		77.3422	56.8227	18.2537	5.11206	49.09	21.85 to 118.3	0.8812
Q2FY55_C54	Q2FY55	QDGTTLVMINSVCGUAGGIAR	SAOUHSC_01610	UPF0403 protein SAOUHSC_01610	no	not assigned		75.2113	58.0773	7.71896	2.21953	55.98	18.65 to 206.3	0.8095

## Sheet: DGS 100 µM
Identifier	Leading razor protein	Sequence	Gene name	Name	Essential?	GO class	Functional site	Median log2(R) 100 mM DGS	Neg. log10(p)	T-test significant	Hit?		log2(R) 100 mM DGS 1	log2(R) 100 mM DGS 2
Q2FXI5_C317	Q2FXI5	ANIGIPTAVIGVUAR	SAOUHSC_01861	Uncharacterized protein	no	Enzyme	Functional site	4.01014	2.05015	+	+		3.95401	4.06626
Q2G112_C97	Q2G112	VFVTEVVUDSVQFLEPK	SAOUHSC_00349	Single-stranded DNA-binding protein	yes	Gene expression and Nucleic acid binding		3.71139	1.71675	+	+		3.82334	3.59944
Q2G243_C99	Q2G243	STLLLQIUASLSQK	radA	DNA repair protein RadA	no	Gene expression and Nucleic acid binding		3.43898	1.90382	+	+		3.5064	3.37156
Q2FVI7_C265	Q2FVI7	SVNQIPGSGAAGGMGAALLAFUETTLTK	SAOUHSC_02723	Glycerate kinase, putative	no	Enzyme		3.43642	1.99966	+	+		3.49044	3.38239
Q2FYG1_C250	Q2FYG1	LGADPMTFLGLGGIGDLIVTUTSTHSR	gpsA	Glycerol-3-phosphate dehydrogenase [NAD(P)+]	no	Enzyme		3.34872	1.74331	+	+		3.44374	3.2537
Q2G1S4_C254	Q2G1S4	MIUSSGNVDSNR	SAOUHSC_00018	Replicative DNA helicase	yes	Gene expression and Nucleic acid binding		3.3164	1.5134	+	+		3.47625	3.15654
Q2G115_C101	Q2G115	EVDAIUQVVR	ychF	Ribosome-binding ATPase YchF	no	Modulator/Scaffolding/Adaptor		3.28821	1.75219	+	+		3.37962	3.1968
Q2G1X6_C23	Q2G1X6	AIVVFSGGQDSTTULFYAK	queC	7-cyano-7-deazaguanine synthase	no	not assigned	Functional site	3.27641	1.74093	+	+		3.36989	3.18293
Q2G1H9_C1906	Q2G1H9	TITHIDUMPLTTNDKVDTTR	SAOUHSC_00144	Uncharacterized protein	no	Enzyme		3.2201	1.28797				2.9589	3.4813
Q2FZR9_C165	Q2FZR9	GPNGATVTAUATGTNSIGEAFK	fabF	3-oxoacyl-[acyl-carrier-protein] synthase 2	yes	Enzyme	Functional site	3.17486	1.72549	+	+		3.26872	3.081
Q2FZ17_C141	Q2FZ17	TADGEPVVYULDK	SAOUHSC_01254	Uncharacterized protein	no	Gene expression and Nucleic acid binding		3.14948	1.5762	+	+		3.28082	3.01814
Q2G038_C250	Q2G038	QAGQPFIDYVIUSTQTFNAQVLK	SAOUHSC_00788	Gluconeogenesis factor	yes	not assigned		3.13986	1.94201	+	+		3.19623	3.08349
Q2FXM9_C8	Q2FXM9	IVUTIGPASESEEMIEK	pyk	Pyruvate kinase	yes	Enzyme		3.13889	1.8713	+	+		3.20521	3.07257
Q2G0M6_C293	Q2G0M6	DKEMTMVMGTSTUHLMLNEK	araB	Ribulokinase	no	Enzyme		3.01206	1.29728				3.25117	2.77294
Q2FXI5_C238	Q2FXI5	ASAEMIDPDVAFVVDUSPANDVK	SAOUHSC_01861	Uncharacterized protein	no	Enzyme	Functional site	2.98934	1.92225	+	+		2.93318	3.04551
Q2G164_C62	Q2G164	AYVLNEDYPIVUIGAANVDRK	SAOUHSC_00291	PfkB family carbohydrate kinase family, putative	no	Enzyme		2.92258	1.83754	+	+		2.98932	2.85583
Q53727_C92	Q53727	LVGDQAEVIWMSTFHSMUVR	pcrA	ATP-dependent DNA helicase PcrA	yes	Gene expression and Nucleic acid binding		2.92094	1.52971	+	+		3.05653	2.78534
Q2G1R8_C60	Q2G1R8	LMGIIISENLIEUVK	SAOUHSC_00034	Uncharacterized protein	no	Gene expression and Nucleic acid binding		2.91811	1.03173				3.34724	2.48898
Q2G0R0_C480	Q2G0R0	IUGLLGGR	ftsH	ATP-dependent zinc metalloprotease FtsH	no	Enzyme		2.88521	1.37626	+	+		3.07605	2.69437
Q2FVI7_C196	Q2FVI7	VAUDVSNPLLGENGATYIYGPQK	SAOUHSC_02723	Glycerate kinase, putative	no	Enzyme		2.86826	1.25641				2.61798	3.11854
Q2G1Z4_C439	Q2G1Z4	AQSLIMGUYGIGISR	proS	Proline--tRNA ligase	yes	Gene expression and Nucleic acid binding		2.85908	1.39215	+	+		3.04138	2.67679
Q2FVT8_C265	Q2FVT8	AGQPVELUGTYVLLASEESSYTTGQVFGVSGGVQID	SAOUHSC_02604	Uncharacterized protein	no	Enzyme		2.85328	1.04524				3.25984	2.44671
Q2FZC6_C72	Q2FZC6	MLVIAUNTATAVALEYLQK	murI	Glutamate racemase	yes	Enzyme	Functional site	2.8514	1.55326	+	+		2.97677	2.72602
Q2FZ17_C175	Q2FZ17	EQSNHNIUYADTEIEAVNYEPR	SAOUHSC_01254	Uncharacterized protein	no	Gene expression and Nucleic acid binding		2.84926	2.39541	+	+		2.86726	2.83125
Q2FZG9_C297	Q2FZG9	HELLILUTGSQGEPMAALSR	rnj1	Ribonuclease J 1	yes	Gene expression and Nucleic acid binding		2.84641	2.13869	+	+		2.8789	2.81392
Q2G0B0_C183	Q2G0B0	QLGMIUASIPTYK	SAOUHSC_00695	Uncharacterized protein	no	not assigned		2.80418	1.79583	+	+		2.87468	2.73368
Q2FXY7_C383	Q2FXY7	EFGIELIATAPSVIYQUVLR	lepA	Elongation factor 4	no	not assigned		2.80173	1.79243	+	+		2.87272	2.73074
Q2FX19_C215	Q2FX19	ALELMUR	SAOUHSC_02087	Conserved hypothetical phage protein	no	not assigned		2.79096	1.6605	+	+		2.8868	2.69513
Q2G1J0_C290	Q2G1J0	SANIILDDANLDLAVEGIQLGILFNQGEVUSAGSR	aldA	Putative aldehyde dehydrogenase AldA	no	Enzyme	Functional site	2.77266	1.93578	+	+		2.82316	2.72216
Q2FY04_C100	Q2FY04	ELUDDDMPVYMTNHK	SAOUHSC_01670	Cytidine deaminase	no	Enzyme		2.76784	2.36316	+	+		2.78668	2.749
Q2FZR9_C220	Q2FZR9	ALSTNDDIETAUR	fabF	3-oxoacyl-[acyl-carrier-protein] synthase 2	yes	Enzyme		2.74739	1.50852	+	+		2.88131	2.61346
Q2FZ66_C120	Q2FZ66	HDYGNSVUVTTQVGCR	rlmN	Probable dual-specificity RNA methyltransferase RlmN	no	Gene expression and Nucleic acid binding		2.73606	1.60085	+	+		2.84386	2.62826
Q2FZJ0_C55	Q2FZJ0	QPNFTETGIFSVMWSEHUSYK	purL	Phosphoribosylformylglycinamidine synthase subunit PurL	no	Enzyme	Functional site	2.72984	1.60615	+	+		2.83609	2.62359
Q2FXM9_C410	Q2FXM9	QUSIVWGVQPVVK	pyk	Pyruvate kinase	yes	Enzyme		2.72772	1.92601	+	+		2.77853	2.67691
Q2G1T3_C54	Q2G1T3	ATNPEQLFAAGYASUFNGAFDLILK	SAOUHSC_00831	Organic hydroperoxide resistance protein-like	no	not assigned		2.71547	1.79218	+	+		2.78432	2.64662
Q2FZG9_C191	Q2FZG9	MAQLGEEGVLULLSDSTNSLVPDFTLSER	rnj1	Ribonuclease J 1	yes	Gene expression and Nucleic acid binding		2.69769	1.64655	+	+		2.79335	2.60203
Q2FUW0_C139	Q2FUW0	ESPVHFEUEYVQTIR	SAOUHSC_02991	Uncharacterized protein	no	not assigned		2.69156	1.577	+	+		2.8036	2.57952
Q2FY27_C252	Q2FY27	VANYIGYLUSIISVTSNPK	SAOUHSC_01646	Glucokinase, putative	no	Enzyme		2.64744	1.47174	+	+		2.78791	2.50696
O07325_C203	O07325	ELGAUVIDIGEDVTQVAFYER	ftsA	Cell division protein FtsA	yes	not assigned		2.62543	1.18495				2.89577	2.3551
Q2FYG6_C136	Q2FYG6	VHQLISESIVDVUR	SAOUHSC_01486	Heptaprenyl diphosphate syntase component II, putative	no	Enzyme		2.62007	1.4775	+	+		2.75726	2.48287
Q2FVI4_C61	Q2FVI4	NNGDLAGILGLUIPELDGK	SAOUHSC_02726	Positive transcriptional activator, putative	no	not assigned		2.60457	1.51037	+	+		2.73099	2.47814
Q2G1D7_C29	Q2G1D7	YILFTQGULLR	pflA	Pyruvate formate-lyase-activating enzyme	no	Enzyme	Functional site	2.60382	1.62988	+	+		2.69977	2.50787
Q2G1Z8_C1254	Q2G1Z8	ENEVPDWYLDSULK	polC	DNA polymerase III PolC-type	yes	Gene expression and Nucleic acid binding		2.59457	1.43608	+	+		2.44509	2.74405
Q2FZ31_C225	Q2FZ31	YFEGUMPFEVMAER	trmFO	Methylenetetrahydrofolate--tRNA-(uracil-5-)-methyltransferase TrmFO	no	Gene expression and Nucleic acid binding		2.59067	2.17048	+	+		2.61816	2.56319
Q2FY27_C237	Q2FY27	AGDQFUIFITEK	SAOUHSC_01646	Glucokinase, putative	no	Enzyme		2.57867	1.52292	+	+		2.70026	2.45707
Q2FVV9_C386	Q2FVV9	QVIGTNNVDNUSR	SAOUHSC_02582	Putative formate dehydrogenase SAOUHSC_02582	no	Enzyme		2.57191	1.73241	+	+		2.64674	2.49708
Q2FWY9_C186	Q2FWY9	QPAAYUGVVGMK	gatA	Glutamyl-tRNA(Gln) amidotransferase subunit A	yes	Enzyme		2.57081	1.67762	+	+		2.65567	2.48594
Q2G1T3_C120	Q2G1T3	YLQMAHEFUPYSK	SAOUHSC_00831	Organic hydroperoxide resistance protein-like	no	not assigned		2.567	3.32425	+	+		2.56891	2.56509
Q2FYV2_C207	Q2FYV2	SSAISNTMIUALAQHNYELAGK	thrB	Homoserine kinase	no	Enzyme		2.55876	1.96395	+	+		2.51508	2.60243
Q2FXA5_C343	Q2FXA5	TSDTDITAUTWTSK	SAOUHSC_01960	Protoporphyrinogen oxidase	no	Enzyme		2.55632	1.62885	+	+		2.4619	2.65074
Q2G1K9_C602	Q2G1K9	IGMPENATFIUIPTTSGTGSEVTPFAVITDSETNVK	SAOUHSC_00113	Aldehyde-alcohol dehydrogenase	no	Enzyme		2.53509	1.83478	+	+		2.59335	2.47682
Q2G0T6_C124	Q2G0T6	AQEYSTVVVDHUFDYFEK	SAOUHSC_00441	Uncharacterized protein	no	not assigned		2.51662	2.59492	+	+		2.50658	2.52667
Q2FVG8_C207	Q2FVG8	LADKIUIMSEGK	SAOUHSC_02744	Amino acid ABC transporter, ATP-binding protein, putative	no	not assigned		2.51357	2.26425	+	+		2.49208	2.53506
Q2G0C6_C216	Q2G0C6	EWYNDNLEQDYHATITVDQVATUK	SAOUHSC_00679	Uncharacterized protein	no	Gene expression and Nucleic acid binding		2.50667	1.26058				2.7233	2.29004
Q2FV62_C235	Q2FV62	GAVFVNUAR	SAOUHSC_02875	D-lactate dehydrogenase, putative	no	Enzyme		2.49806	1.71852	+	+		2.57311	2.42301
Q2FW16_C84	Q2FW16	FDENAUVIIR	rplN	50S ribosomal protein L14	yes	Modulator/Scaffolding/Adaptor		2.49023	1.77909	+	+		2.5553	2.42516
Q2G1K9_C258	Q2G1K9	TFDNGMIUASEQVVVIDK	SAOUHSC_00113	Aldehyde-alcohol dehydrogenase	no	Enzyme		2.48489	1.57505	+	+		2.58879	2.38099
Q2FZ17_C152	Q2FZ17	ELTUTEYQMSNGSILSAIK	SAOUHSC_01254	Uncharacterized protein	no	Gene expression and Nucleic acid binding		2.4771	1.66395	+	+		2.39271	2.56149
Q2G0I6_C324	Q2G0I6	TSGAGGGDUGITIINK	SAOUHSC_00579	Phosphomevalonate kinase	yes	Enzyme		2.47277	2.25172	+	+		2.49452	2.45101
Q2G1S1_C43	Q2G1S1	LUNHYDIPTPLK	rsmI	Ribosomal RNA small subunit methyltransferase I	no	Gene expression and Nucleic acid binding		2.47038	1.82109	+	+		2.52897	2.41178
Q2G0I6_C304	Q2G0I6	YLUDIAEK	SAOUHSC_00579	Phosphomevalonate kinase	yes	Enzyme		2.45928	1.79063	+	+		2.52185	2.39671
Q2FVI7_C80	Q2FVI7	YTVIVNDPLMRPIEAUYAR	SAOUHSC_02723	Glycerate kinase, putative	no	Enzyme		2.45117	1.59679	+	+		2.54866	2.35369
Q2G1D8_C691	Q2G1D8	NLTSMLDGYAMQUGHHLNINVFNR	pflB	Formate acetyltransferase	no	Enzyme		2.44882	1.43946	+	+		2.5888	2.30883
Q2FZF5_C36	Q2FZF5	FDEIHVUVLK	coaD	Phosphopantetheine adenylyltransferase	yes	Enzyme		2.43313	1.79377	+	+		2.49459	2.37167
Q2G112_C51	Q2G112	EADFINUVVFR	SAOUHSC_00349	Single-stranded DNA-binding protein	yes	Gene expression and Nucleic acid binding		2.4317	1.33075	+	+		2.61037	2.25302
Q2G1Z8_C1138	Q2G1Z8	TIPVDDKEVMQIFSTPESLGVTEDEILUK	polC	DNA polymerase III PolC-type	yes	Gene expression and Nucleic acid binding		2.43155	1.01766				2.80108	2.06202
Q2FZ13_C151	Q2FZ13	TESIVAGSVUAHK	SAOUHSC_01258	Uncharacterized protein	no	not assigned		2.41724	1.62216	+	+		2.50791	2.32656
Q2G1Z8_C1030	Q2G1Z8	GUTGVKR	polC	DNA polymerase III PolC-type	yes	Gene expression and Nucleic acid binding		2.40775	1.51273	+	+		2.52399	2.29152
Q2FV74_C569	Q2FV74	NTIIIUTSNAGFGNGNDAEEKDIMHEMK	clpL	ATP-dependent Clp protease ATP-binding subunit ClpL	no	not assigned		2.40749	1.26352				2.61413	2.20084
Q2FXX2_C98	Q2FXX2	NIDISNDEIYNLMIYQLGALQGFUR	SAOUHSC_01708	UPF0271 protein SAOUHSC_01708	no	Enzyme		2.39306	2.39752	+	+		2.37801	2.40811
Q2G1G4_C269	Q2G1G4	FVALNYHAILDUITQSK	SAOUHSC_00160	Uncharacterized protein	no	Gene expression and Nucleic acid binding		2.39186	2.0069	+	+		2.42884	2.35488
Q2FVT8_C225	Q2FVT8	VNUVAPGPFWSPLQISGGQPQSK	SAOUHSC_02604	Uncharacterized protein	no	Enzyme		2.38476	1.46558	+	+		2.51311	2.25641
Q2G1K9_C844	Q2G1K9	MAELAFEDQUTTANPK	SAOUHSC_00113	Aldehyde-alcohol dehydrogenase	no	Enzyme		2.38005	1.68701	+	+		2.45694	2.30317
P0A0Q0_C222	P0A0Q0	VGKEDFTSFUQLNELTAVVMDYEDEEKVETIK	lacR	Lactose phosphotransferase system repressor	no	Gene expression and Nucleic acid binding		2.37451	1.3224	+	+		2.55238	2.19664
Q2FZU1_C116	Q2FZU1	TNSVGIAHGUTGK	argG	Argininosuccinate synthase	no	Enzyme	Functional site	2.36125	1.59184	+	+		2.45623	2.26626
Q2FVV9_C390	Q2FVV9	YUQAPATK	SAOUHSC_02582	Putative formate dehydrogenase SAOUHSC_02582	no	Enzyme		2.36066	1.78408	+	+		2.42164	2.29968
Q2FZ59_C30	Q2FZ59	AVEUYGIVGMASR	SAOUHSC_01192	Uncharacterized protein	no	not assigned		2.35865	1.42502	+	+		2.49805	2.21925
Q2G1Z3_C191	Q2G1Z3	LNQEQGUTIVMVLHDINQAIR	SAOUHSC_00652	Iron compound ABC transporter, ATP-binding protein	no	not assigned		2.34615	2.06402	+	+		2.37796	2.31435
Q2FUW3_C371	Q2FUW3	EUITSVNEEYQAK	asp1	Accessory Sec system protein Asp1	no	not assigned		2.34314	1.4245	+	+		2.48179	2.20449
Q2G1J4_C258	Q2G1J4	VNIHQPGPGVGGHULAVDPYFIIAK	SAOUHSC_00128	Cap5O protein/UDP-N-acetyl-D-mannosaminuronic acid dehydrogenase	no	Enzyme		2.3376	1.78319	+	+		2.3981	2.27709
Q2G0S3_C100	Q2G0S3	EGTTIVVUGDTPLITK	glmU	Bifunctional protein GlmU	yes	Enzyme	Functional site	2.3352	1.53267	+	+		2.44287	2.22753
Q2G0Y9_C176	Q2G0Y9	LEEAGLTVSSLUK	xpt	Xanthine phosphoribosyltransferase	no	Enzyme		2.32853	1.76916	+	+		2.39078	2.26628
Q2G1E1_C135	Q2G1E1	SLASUHDAFQPLLK	SAOUHSC_00184	Uncharacterized response regulatory protein SAOUHSC_00184	no	Gene expression and Nucleic acid binding		2.3234	1.6391	+	+		2.40722	2.23958
Q2FY71_C35	Q2FY71	AEQIIDUAVENGITYFDTADMYDK	SAOUHSC_01594	Uncharacterized protein	no	not assigned		2.31147	2.34385	+	+		2.32792	2.29502
Q2G2V5_C124	Q2G2V5	NDYLETAGPVLFNUINDIELAQR	SAOUHSC_01913	Uncharacterized protein	no	not assigned		2.30787	1.09018				2.60402	2.01171
Q2FZ04_C50	Q2FZ04	AAANIGLEPEEVAIITGIGUSGR	SAOUHSC_01267	Uncharacterized protein	no	Enzyme		2.30728	2.05328	+	+		2.27522	2.33934
Q2FVM0_C204	Q2FVM0	IITQIQQYTDIDYPIAIVFQASUFNEFVVK	SAOUHSC_02682	Uroporphyrin-III C-methyltransferase, putative	no	Enzyme		2.30244	1.29431				2.48648	2.11839
Q2G1D0_C379	Q2G1D0	YGMVTMUIGVGMGAAAIFEYVR	SAOUHSC_00195	Acetyl-CoA acetyltransferase, putative	no	Enzyme	Functional site	2.29997	2.45305	+	+		2.28724	2.31269
Q2FXZ5_C82	Q2FXZ5	QNINTELPVDVTIUSGLIK	SAOUHSC_01680	Ribosomal RNA small subunit methyltransferase E	no	Gene expression and Nucleic acid binding		2.29449	1.64246	+	+		2.37662	2.21235
Q2FY27_C185	Q2FY27	SGUIETVASATGVVNLVNFYYPK	SAOUHSC_01646	Glucokinase, putative	no	Enzyme		2.29274	2.70728	+	+		2.2998	2.28567
Q2FVQ5_C63	Q2FVQ5	LAQPGEESSNVWNNAGTGHSALUELNYTK	mqo	Probable malate:quinone oxidoreductase	no	Enzyme		2.29061	1.62479	+	+		2.37601	2.2052
Q2G1K9_C431	Q2G1K9	VLVNTPSAVGGIGDMYNELIPSLTLGUGSYGR	SAOUHSC_00113	Aldehyde-alcohol dehydrogenase	no	Enzyme		2.28669	2.10365	+	+		2.2584	2.31499
Q2G084_C36	Q2G084	NINQGIGEVTTALSSIUK	SAOUHSC_00736	Putative lipid kinase SAOUHSC_00736	no	Enzyme		2.27654	1.72484	+	+		2.20914	2.34395
Q2FUZ6_C38	Q2FUZ6	VILVVNTATEUIYSEQLK	SAOUHSC_02949	Glutathione peroxidase	no	Enzyme	Functional site	2.26845	1.31363	+	+		2.44186	2.09505
Q2G099_C193	Q2G099	VGDYUENRI	SAOUHSC_00722	Para-aminobenzoate synthase, glutamine amidotransferase, component II, putative	no	Enzyme		2.26415	1.46685	+	+		2.38565	2.14264
Q2FXB7_C50	Q2FXB7	IIUGILQQDSGEIK	SAOUHSC_01948	ABC transporter domain protein	no	not assigned		2.24007	1.23641				2.4448	2.03534
Q2G2N4_C17	Q2G2N4	TLNNNVVVUTNNDQEVILIGK	glcT	Protein GlcT	no	Gene expression and Nucleic acid binding		2.23072	2.11494	+	+		2.25761	2.20383
Q2FYQ9_C23	Q2FYQ9	GFNYYQSEUVINLK	SAOUHSC_01376	Uncharacterized protein	no	not assigned		2.23064	1.19482				2.45512	2.00615
Q2G0L9_C109	Q2G0L9	GGUSGSLMNLLQQSNFNHR	tadA	tRNA-specific adenosine deaminase	no	Gene expression and Nucleic acid binding		2.22652	1.31232	+	+		2.39724	2.0558
Q2FY52_C175	Q2FY52	LPFVUVIINNK	SAOUHSC_01613	2-oxoisovalerate dehydrogenase, E1 component, alpha subunit, putative	no	Enzyme		2.22083	1.52231	+	+		2.3257	2.11597
Q2G1K9_C493	Q2G1K9	VMIVUDPGMVEFGYTK	SAOUHSC_00113	Aldehyde-alcohol dehydrogenase	no	Enzyme		2.22018	1.39951	+	+		2.35935	2.081
Q2G012_C232	Q2G012	INHFUVVPQINSFK	emp	Extracellular matrix protein-binding protein emp	no	not assigned		2.2156	1.48222	+	+		2.33036	2.10084
Q2G1Z3_C260	Q2G1Z3	TGKPLLVTYDLUR	SAOUHSC_00652	Iron compound ABC transporter, ATP-binding protein	no	not assigned		2.21307	1.35401	+	+		2.36718	2.05897
Q2FXW5_C341	Q2FXW5	SPFDFUGLVLDYNEDTK	SAOUHSC_01716	Uncharacterized protein	no	Enzyme		2.20767	1.39135	+	+		2.34869	2.06664
Q2FWJ6_C25	Q2FWJ6	HUAYFNKR	SAOUHSC_02296	Protein SprT-like	no	not assigned		2.20152	1.48938	+	+		2.31368	2.08936
Q2FV10_C380	Q2FV10	DGLFFEPTVITNUDTSMR	SAOUHSC_02933	Betaine aldehyde dehydrogenase	no	Enzyme		2.19542	1.53875	+	+		2.29524	2.09561
Q2G0T5_C493	Q2G0T5	SSIESVVUNIVNK	dnaX	DNA polymerase III subunit gamma/tau	yes	Gene expression and Nucleic acid binding		2.19437	1.38918	+	+		2.33525	2.05349
Q2G0M8_C113	Q2G0M8	GTEAAIAYQSGFNUNMAAISAVMNK	SAOUHSC_00532	Uncharacterized protein	no	not assigned		2.19087	1.6289	+	+		2.27178	2.10995
Q2FX00_C94	Q2FX00	EAIEDGMPGLTIUGGYQFLGK	SAOUHSC_02106	Uncharacterized protein	yes	Enzyme		2.19019	3.15307	+	+		2.18777	2.1926
Q2FX96_C289	Q2FX96	ALQEUINNVKK	SAOUHSC_01981	Sensor histidine kinase, putative	no	Modulator/Scaffolding/Adaptor		2.1856	1.9997	+	+		2.15124	2.21996
Q9RQQ0_C55	Q9RQQ0	CUFDYLNNIIMMNQNK	icaR	Biofilm operon icaADBC HTH-type negative transcriptional regulator IcaR	no	Gene expression and Nucleic acid binding		2.18186	1.93008	+	+		2.22212	2.1416
Q2FXX2_C221	Q2FXX2	EVTLQADTIUVHGDGEHALLFVSK	SAOUHSC_01708	UPF0271 protein SAOUHSC_01708	no	Enzyme		2.18033	1.96641	+	+		2.21733	2.14332
Q2FYP0_C224	Q2FYP0	VTATUAR	asd	Aspartate-semialdehyde dehydrogenase	no	Enzyme	Functional site	2.17917	2.21635	+	+		2.19997	2.15837
Q2G1Z8_C661	Q2G1Z8	SLLDEYREGLLVGTAUDEGELFTAVMQK	polC	DNA polymerase III PolC-type	yes	Gene expression and Nucleic acid binding		2.17648	1.51532	+	+		2.07204	2.28093
Q2FY43_C372	Q2FY43	IESAUYTNYTIPPYYDSMVAK	SAOUHSC_01623	Acetyl-CoA carboxylase, biotin carboxylase	yes	Enzyme		2.16983	3.4951	+	+		2.17092	2.16874
Q2G1B9_C38	Q2G1B9	PLYMSIUAADQR	tarJ	Ribulose-5-phosphate reductase 1	yes	Enzyme	Functional site	2.16952	1.43825	+	+		2.29388	2.04515
Q2FZJ0_C724	Q2FZJ0	QIWEGAIAQULTTQD	purL	Phosphoribosylformylglycinamidine synthase subunit PurL	no	Enzyme		2.16599	1.63077	+	+		2.24565	2.08634
Q2G1X7_C40	Q2G1X7	CSWUDSAFTWDGSAK	queE	7-carboxy-7-deazaguanine synthase	no	Enzyme	Functional site	2.16348	1.60587	+	+		2.24775	2.07922
Q2G115_C306	Q2G115	QGMTAPQUAGIIHTDFER	ychF	Ribosome-binding ATPase YchF	no	Modulator/Scaffolding/Adaptor		2.15798	3.00358	+	+		2.15462	2.16134
Q2FZV6_C284	Q2FZV6	FDMUGAANVVGIIEAASR	SAOUHSC_00879	Probable cytosol aminopeptidase	no	Enzyme		2.15284	1.16798				1.92227	2.38341
Q2FUY1_C233	Q2FUY1	HLFNDVUV	arcR	HTH-type transcriptional regulator ArcR	no	Gene expression and Nucleic acid binding		2.15174	1.22169				2.35521	1.94826
Q2FZW9_C181	Q2FZW9	DAEADFNATYVSFETLLAESDFIIUTAPLTK	SAOUHSC_00866	D-isomer specific 2-hydroxyacid dehydrogenase, NAD binding domain protein	no	Enzyme		2.15014	1.65976	+	+		2.2241	2.07618
Q7X2S2_C190	Q7X2S2	NIVIAUGGGGIPVIK	arcC2	Carbamate kinase 2	no	Enzyme		2.14192	1.51341	+	+		2.24516	2.03868
Q2G1C4_C315	Q2G1C4	GHEINVUTMQDIVQAFEMDLSTSWGK	tarJ'	Ribulose-5-phosphate reductase 2	no	Enzyme		2.1402	1.86645	+	+		2.18593	2.09447
Q2FWN8_C257	Q2FWN8	EISEEDANYASGLTAVUSIINGGK	SAOUHSC_02244	Uncharacterized protein	no	Enzyme		2.13629	0.971131				1.77425	2.49833
Q2FZU5_C111	Q2FZU5	GGIVUDPR	SAOUHSC_00895	Glutamate dehydrogenase	no	Enzyme		2.13538	1.65742	+	+		2.20923	2.06153
Q2FVV7_C185	Q2FVV7	LVGAUGLDSMR	SAOUHSC_02584	Uncharacterized protein	no	Enzyme	Functional site	2.12408	1.17484				2.34798	1.90018
Q53727_C456	Q53727	VTQEULNFYELIQSLIK	pcrA	ATP-dependent DNA helicase PcrA	yes	Gene expression and Nucleic acid binding		2.11707	2.71555	+	+		2.12347	2.11066
Q2FWG1_C215	Q2FWG1	HTHGTGUTFSAVITAELAK	SAOUHSC_02330	Phosphomethylpyrimidine kinase	no	Enzyme		2.11696	1.5038	+	+		2.22129	2.01264
Q2FXF5_C89	Q2FXF5	NSNLVVTLCSDADVNUPSLPTNVK	arsC	Arsenate reductase	no	Enzyme	Functional site	2.10345	1.24197				2.29323	1.91367
Q2FZR5_C173	Q2FZR5	IVIATALAUEPK	SAOUHSC_00925	Uncharacterized protein	no	not assigned		2.10086	1.48611	+	+		2.2087	1.99302
Q2G1S1_C33	Q2G1S1	VDMIAUEDTR	rsmI	Ribosomal RNA small subunit methyltransferase I	no	Gene expression and Nucleic acid binding		2.09683	1.31398	+	+		2.25699	1.93667
Q2G1D7_C36	Q2G1D7	CLYUHNPDTWK	pflA	Pyruvate formate-lyase-activating enzyme	no	Enzyme	Functional site	2.09626	1.58851	+	+		2.18123	2.01128
Q2FYS0_C275	Q2FYS0	SHLVNLUK	SAOUHSC_01365	Uncharacterized protein	no	Enzyme		2.09222	1.29193				2.26039	1.92406
Q2FY55_C52	Q2FY55	QDGTTLVMINSVUGCAGGIAR	SAOUHSC_01610	UPF0403 protein SAOUHSC_01610	no	not assigned		2.0893	1.52415	+	+		2.18755	1.99106
Q2FVV7_C247	Q2FVV7	AUHETVLK	SAOUHSC_02584	Uncharacterized protein	no	Enzyme		2.08825	1.15923				2.31649	1.86001
Q2FVL8_C325	Q2FVL8	VSGUDLYSAGQIVENAEIK	SAOUHSC_02684	Assimilatory nitrite reductase [NAD(P)H], large subunit, putative	no	Enzyme		2.0875	1.64126	+	+		2.16244	2.01257
Q2G0D6_C190	Q2G0D6	DIYESMEEIADKUQIVANNFETIIMK	SAOUHSC_00669	Uncharacterized protein	no	not assigned		2.08446	1.5022	+	+		2.18756	1.98135
Q2FZG9_C406	Q2FZG9	AHGETGVEUGVEEDNVFIFDIGDVLALTHDSAR	rnj1	Ribonuclease J 1	yes	Gene expression and Nucleic acid binding		2.08183	0.974232				1.73157	2.43208
Q2G255_C7	Q2G255	IGITUYPSMGGSGIIATELGIK	SAOUHSC_01475	Uncharacterized protein	no	Enzyme		2.07308	1.47127	+	+		2.1832	1.96296
Q2FUS7_C252	Q2FUS7	DWFDGKPUER	SAOUHSC_03024	UPF0176 protein SAOUHSC_03024	no	not assigned		2.07073	1.06231				2.35428	1.78718
Q2FZP4_C112	Q2FZP4	TLMAVDSAVMVIDUAK	prfC	Peptide chain release factor 3	no	Gene expression and Nucleic acid binding		2.06983	2.01914	+	+		2.03872	2.10094
Q2FZ72_C525	Q2FZ72	MVDTUAAEFESSTPYYYGTYETENESIVTDKEK	carB	Carbamoyl-phosphate synthase large chain	no	Enzyme		2.06865	1.37882	+	+		1.93263	2.20467
Q2G1E6_C34	Q2G1E6	VENVEMIAFUDVDISK	SAOUHSC_00179	Uncharacterized protein	no	Enzyme		2.067	1.83213	+	+		2.1148	2.0192
Q2FWF5_C94	Q2FWF5	IALFAGIDKUR	fabZ	3-hydroxyacyl-[acyl-carrier-protein] dehydratase FabZ	yes	Enzyme		2.06354	1.1483				2.29487	1.8322
Q2G0D6_C152	Q2G0D6	EFETNUDGILR	SAOUHSC_00669	Uncharacterized protein	no	not assigned		2.05937	1.74392	+	+		2.11772	2.00102
Q2FXW9_C234	Q2FXW9	IATVUKFDLPK	SAOUHSC_01711	Uncharacterized protein	no	not assigned		2.05108	1.38473	+	+		2.18412	1.91804
Q2FV10_C289	Q2FV10	NPNIIFDDADFELAVDQALNGGYFHAGQVUSAGSR	SAOUHSC_02933	Betaine aldehyde dehydrogenase	no	Enzyme		2.05037	2.06026	+	+		2.02233	2.0784
Q2FVP8_C265	Q2FVP8	LDMHDDUR	SAOUHSC_02654	Ferredoxin--NADP reductase	no	Enzyme		2.04866	1.82761	+	+		2.09653	2.00079
Q2FZF5_C79	Q2FZF5	VHQFSGLLVDYUEQVGAK	coaD	Phosphopantetheine adenylyltransferase	yes	Enzyme	Functional site	2.04853	1.40673	+	+		2.17482	1.92224
Q2G0S2_C173	Q2G0S2	DDPNINPEEUVVVSPDHGGVTR	prs	Ribose-phosphate pyrophosphokinase	yes	Enzyme		2.04748	1.93175	+	+		2.08512	2.00984
Q2G078_C403	Q2G078	MSNLUTEIFQLQETSIINDYGIEDEIK	SAOUHSC_00742	Ribonucleoside-diphosphate reductase	yes	Enzyme		2.04195	2.08551	+	+		2.06829	2.0156
Q2G2W9_C105	Q2G2W9	LVNUEYTLDK	SAOUHSC_00455	Uncharacterized protein	no	not assigned		2.0417	1.49064	+	+		2.14542	1.93798
Q2FV16_C62	Q2FV16	NNAGTGHAALUELNYTVLQPDGSIDIEK	mqo	Probable malate:quinone oxidoreductase	no	Enzyme		2.04045	1.52897	+	+		2.13534	1.94557
Q2FXW5_C118	Q2FXW5	TGATGIIVADPLIIETUK	SAOUHSC_01716	Uncharacterized protein	no	Enzyme		2.03271	1.54187	+	+		2.12446	1.94096
Q2FZJ0_C522	Q2FZJ0	GMAEAUDILK	purL	Phosphoribosylformylglycinamidine synthase subunit PurL	no	Enzyme		2.02626	1.54249	+	+		2.1176	1.93493
Q2G2S8_C955	Q2G2S8	SLSEHYQVLYFTUVK	SAOUHSC_01974	Uncharacterized protein	no	not assigned		2.02246	2.04672	+	+		2.05099	1.99393
Q2G039_C262	Q2G039	SQLVIAIGUTGGQHR	SAOUHSC_00787	Nucleotide-binding protein SAOUHSC_00787	no	not assigned		2.0137	1.41081	+	+		2.13668	1.89072
Q2G243_C378	Q2G243	AVDGLDUYIGEVGLTGEVR	radA	DNA repair protein RadA	no	Gene expression and Nucleic acid binding		2.01341	2.0453	+	+		2.04191	1.98492
Q2FY55_C54	Q2FY55	QDGTTLVMINSVCGUAGGIAR	SAOUHSC_01610	UPF0403 protein SAOUHSC_01610	no	not assigned		2.01224	1.75018	+	+		2.06844	1.95604
Q2FZ13_C226	Q2FZ13	VVEHPDLFVETSTUTMEDFDYIIELR	SAOUHSC_01258	Uncharacterized protein	no	not assigned		2.00902	1.95869	+	+		2.04373	1.97431
Q53727_C243	Q53727	NLUVVGDSDQSIYGWR	pcrA	ATP-dependent DNA helicase PcrA	yes	Gene expression and Nucleic acid binding		2.00487	1.28501				2.16861	1.84113
Q2G1C4_C229	Q2G1C4	IDHAFEUVGGK	tarJ'	Ribulose-5-phosphate reductase 2	no	Enzyme		2.00475	1.57871	+	+		1.92163	2.08787
Q2G167_C193	Q2G167	AUIIVTHDER	SAOUHSC_00287	ABC transporter, ATP-binding protein, putative	no	not assigned		1.99526	1.35209	+			1.85571	2.13481
Q2FWG0_C137	Q2FWG0	ENAIYTIAAMAPUPYIYAELAK	tenA	Aminopyrimidine aminohydrolase	no	Enzyme	Functional site	1.98846	1.33129	+			1.84254	2.13439
Q2FXK3_C127	Q2FXK3	LITIADNNUMISNAVR	SAOUHSC_01831	Uncharacterized protein	no	not assigned		1.98804	1.35286	+			2.12684	1.84924
Q2G1C8_C143	Q2G1C8	TUFALTEPEHGSDVAGGLETVAER	SAOUHSC_00197	Uncharacterized protein	no	Enzyme		1.98777	1.41048	+			2.10926	1.86627
Q2G1G6_C272	Q2G1G6	VATVMGMUGISK	murQ	N-acetylmuramic acid 6-phosphate etherase	no	Enzyme		1.9875	1.17492				2.19696	1.77803
Q2G0M6_C394	Q2G0M6	SVLSDSNLTGUIFGLTLQTK	araB	Ribulokinase	no	Enzyme		1.97737	1.42866	+			1.86148	2.09326
Q2G146_C76	Q2G146	LMFVEADLSQDEHWDEAMKDUK	SAOUHSC_00309	Uncharacterized protein	no	Enzyme		1.97667	1.4033	+			2.0995	1.85384
Q2FXK3_C85	Q2FXK3	FTDISIEQQSIGTAULNNGK	SAOUHSC_01831	Uncharacterized protein	no	not assigned		1.97497	1.27601				2.13967	1.81028
Q2FXW5_C307	Q2FXW5	INPEWLIELDKUANR	SAOUHSC_01716	Uncharacterized protein	no	Enzyme		1.97242	1.26814				2.13993	1.80492
Q2FWH6_C207	Q2FWH6	LSQUHEDAK	SAOUHSC_02315	DNA-binding response regulator, putative	no	Gene expression and Nucleic acid binding	Functional site	1.96457	2.5369	+			1.95561	1.97354
Q2G069_C224	Q2G069	QPLEYPSUGSVFQRPPGHFAGK	murB	UDP-N-acetylenolpyruvoylglucosamine reductase	yes	Enzyme	Functional site	1.95962	1.38418	+			2.08689	1.83235
Q2FUX7_C358	Q2FUX7	EQWNDGSNTLUIR	arcA	Arginine deiminase	no	Enzyme		1.95891	1.43518	+			2.07201	1.84582
Q2FVN3_C13	Q2FVN3	QLUFLFYVSSK	sarZ	HTH-type transcriptional regulator SarZ	no	Gene expression and Nucleic acid binding		1.95473	1.42607	+			2.06998	1.83948
Q2FUQ2_C88	Q2FUQ2	TFTREDIIEINUHGGILTINR	mnmE	tRNA modification GTPase MnmE	yes	not assigned	Functional site	1.95082	3.47507	+			1.9498	1.95185
Q2FZ25_C191	Q2FZ25	LNIPIVGIVDTNUDPDEIDYVIPANDDAIR	rpsB	30S ribosomal protein S2	yes	Modulator/Scaffolding/Adaptor		1.94415	1.58164	+			2.02422	1.86408
Q2FV75_C78	Q2FV75	GDNPEITIPLKPTGSHFQQUVWNELR	SAOUHSC_02861	Methylated-DNA--protein-cysteine methyltransferase	no	Gene expression and Nucleic acid binding		1.93811	1.91222	+			1.97537	1.90084
Q2G292_C238	Q2G292	GEDIGYGHTVNVPLEPYTEDASFLEUFK	SAOUHSC_01849	Uncharacterized protein	no	not assigned		1.93211	1.10931				2.16925	1.69497
Q2FZ50_C95	Q2FZ50	ATIVUEPSLVIFANK	rnc	Ribonuclease 3	no	Gene expression and Nucleic acid binding		1.9306	1.28586				2.08797	1.77324
Q2FY32_C53	Q2FY32	LTIPEIFUK	aroK	Shikimate kinase	no	Enzyme		1.91321	2.07931	+			1.93824	1.88817
Q2FYJ0_C1074	Q2FYJ0	DIHESIUQSTLGLLQPQMGLLR	SAOUHSC_01455	Uncharacterized protein	no	not assigned		1.91246	1.3806	+			2.0377	1.78722
Q2G050_C213	Q2G050	VRGDVVEIFPASKEELUIR	SAOUHSC_00776	Excinuclease ABC, B subunit	no	Gene expression and Nucleic acid binding		1.91059	1.57286	+			1.99088	1.8303
Q2G1N2_C259	Q2G1N2	VVVDDWSQUNR	SAOUHSC_00076	Ornithine cyclodeaminase, putative	no	Enzyme		1.90989	2.01367	+			1.88082	1.93897
Q2G292_C147	Q2G292	ASGFUIYNDIAITAQYLAK	SAOUHSC_01849	Uncharacterized protein	no	not assigned		1.90539	2.57141	+			1.89736	1.91342
Q2FWL2_C14	Q2FWL2	DILILAVETSUDETSVSVIK	tsaD	tRNA N6-adenosine threonylcarbamoyltransferase	yes	Enzyme		1.88408	1.68908	+			1.94465	1.8235
Q2G078_C191	Q2G078	GELVSUFLLEVDDSLNSINFIDSTAK	SAOUHSC_00742	Ribonucleoside-diphosphate reductase	yes	Enzyme		1.88243	2.10131	+			1.90585	1.85902
Q2G1G6_C245	Q2G1G6	IIQEIUAITYDEAMALYQVSEHDVK	murQ	N-acetylmuramic acid 6-phosphate etherase	no	Enzyme		1.87928	1.42336	+			1.99077	1.76778
Q2FWX5_C231	Q2FWX5	YDNIUTNHFEILTHENR	SAOUHSC_02146	Uncharacterized protein	no	not assigned		1.87758	1.55518	+			1.95977	1.79539
Q2FXX1_C255	Q2FXX1	QQIUNDAVK	SAOUHSC_01709	Acetyl-CoA carboxylase, biotin carboxylase, putative	no	Enzyme		1.87248	1.82169	+			1.91683	1.82812
Q2FZB0_C273	Q2FZB0	TGNPNVIFEHULPSFHNADTK	argF	Ornithine carbamoyltransferase	no	Enzyme		1.87031	1.54771	+			1.9536	1.78701
Q2G2A7_C260	Q2G2A7	DYVVNIYGQDFEUVDMGIPENK	potA	Spermidine/putrescine import ATP-binding protein PotA	no	Receptor/Transporter/Channel		1.86783	1.38992	+			1.98754	1.74812
Q2FY71_C19	Q2FY71	SGISLSELGLGUMSLGTDLK	SAOUHSC_01594	Uncharacterized protein	no	not assigned		1.86224	1.50532	+			1.95369	1.77079
Q2G2J2_C171	Q2G2J2	NLYTSGQUTYYVFDR	ssaA2	Staphylococcal secretory antigen ssaA2	yes	not assigned		1.85455	1.26925				2.01164	1.69746
Q2FV60_C274	Q2FV60	ILUTADFPSVAESLMPDFAPIK	crtN	Dehydrosqualene desaturase	no	Enzyme		1.85253	1.13999				2.06426	1.64081
Q2FVT8_C35	Q2FVT8	QEQEVPGLQSEMTPAPDUGETSYQGHQR	SAOUHSC_02604	Uncharacterized protein	no	Enzyme		1.85209	1.37277	+			1.97558	1.72859
Q2FZ31_C52	Q2FZ31	FAELVUSNSLR	trmFO	Methylenetetrahydrofolate--tRNA-(uracil-5-)-methyltransferase TrmFO	no	Gene expression and Nucleic acid binding		1.84448	1.55333	+			1.92556	1.76339
Q2FZV7_C354	Q2FZV7	GTVUSLGSHDGVGMVFGK	SAOUHSC_00878	NADH dehydrogenase-like protein SAOUHSC_00878	no	Enzyme		1.84405	1.89486	+			1.88096	1.80715
Q2FY44_C75	Q2FY44	EDGIYIDVYUALK	SAOUHSC_01622	Uncharacterized protein	no	not assigned		1.84102	1.56988	+			1.91892	1.76311
Q2FWL2_C302	Q2FWL2	LUTDNAAMIGVAGHYLYQQGR	tsaD	tRNA N6-adenosine threonylcarbamoyltransferase	yes	Enzyme	Functional site	1.83886	1.79019	+			1.88569	1.79202
Q2FWY9_C91	Q2FWY9	DNIITNGLETTUASK	gatA	Glutamyl-tRNA(Gln) amidotransferase subunit A	yes	Enzyme		1.82521	1.96639	+			1.85619	1.79423
Q7X2S2_C78	Q7X2S2	SNSDTTPAMPLDTUGAMSQGMIGYWLETEINR	arcC2	Carbamate kinase 2	no	Enzyme		1.81986	1.53605	+			1.90312	1.7366
Q2FXV9_C667	Q2FXV9	VVNMAPFSIELUGGIHVR	alaS	Alanine--tRNA ligase	yes	Gene expression and Nucleic acid binding	Functional site	1.81542	1.34542	+			1.94437	1.68648
Q2G0S8_C139	Q2G0S8	IGTDIPFUIYNK	SAOUHSC_00466	Putative 4-diphosphocytidyl-2-C-methyl-D-erythritol kinase	no	Enzyme	Functional site	1.81059	1.39	+			1.92661	1.69457
Q2FUX5_C58	Q2FUX5	VPIDUETWIYK	argR	Arginine repressor	no	Gene expression and Nucleic acid binding		1.81	0.8933				1.44154	2.17846
Q2G059_C138	Q2G059	EAVPUIVTLNYDQTGKFEYELASTHFMLR	SAOUHSC_00763	Uncharacterized protein	no	not assigned		1.80248	1.22145				1.97302	1.63194
Q2G1G4_C124	Q2G1G4	FVATNIMDAQIDAIUDVLK	SAOUHSC_00160	Uncharacterized protein	no	Gene expression and Nucleic acid binding		1.80071	1.16275				1.99592	1.60549
Q2G1S4_C357	Q2G1S4	ELKUPVIALSQLSR	SAOUHSC_00018	Replicative DNA helicase	yes	Gene expression and Nucleic acid binding		1.79893	1.43866	+			1.90196	1.6959
Q2FVL8_C452	Q2FVL8	AGNSUGK	SAOUHSC_02684	Assimilatory nitrite reductase [NAD(P)H], large subunit, putative	no	Enzyme		1.79658	1.32866	+			1.92923	1.66394
Q2FZW9_C276	Q2FZW9	DNMIQLUINNIEAVMTNQVPHTPVN	SAOUHSC_00866	D-isomer specific 2-hydroxyacid dehydrogenase, NAD binding domain protein	no	Enzyme		1.79313	1.26199				1.94759	1.63868
Q2FXV8_C236	Q2FXV8	AALLYTLEEEUIK	recD2	ATP-dependent RecD-like DNA helicase	no	Gene expression and Nucleic acid binding		1.79254	1.1969				1.97207	1.61301
Q2FXY0_C277	Q2FXY0	RPLVUFFSNDLNIHR	SAOUHSC_01700	Uncharacterized protein	yes	not assigned		1.78984	1.11287				2.00771	1.57197
Q2FZJ0_C496	Q2FZJ0	NLIAVGATPLAMTDULNYGSPEK	purL	Phosphoribosylformylglycinamidine synthase subunit PurL	no	Enzyme	Functional site	1.78328	1.37791	+			1.90079	1.66578
Q2G0N5_C355	Q2G0N5	MYQUGLPK	rpoC	DNA-directed RNA polymerase subunit beta'	yes	Gene expression and Nucleic acid binding		1.78263	1.32512	+			1.91533	1.64994
Q2FWW9_C187	Q2FWW9	LEDIELIUDR	SAOUHSC_02152	ABC transporter, ATP-binding protein, putative	yes	not assigned		1.78195	1.96267	+			1.75145	1.81246
Q2FZV7_C238	Q2FZV7	IATPIVAUNEK	SAOUHSC_00878	NADH dehydrogenase-like protein SAOUHSC_00878	no	Enzyme		1.77831	1.41904	+			1.88487	1.67175
Q2FXJ7_C38	Q2FXJ7	YVVTUTHESYNEVIMLGMALYPNQIHYMAK	SAOUHSC_01837	1-acyl-sn-glycerol-3-phosphate acyltransferases domain protein	yes	Enzyme		1.76794	0.678399				1.16356	2.37231
Q2G203_C37	Q2G203	IEIYSFFDPFSSDUFK	SAOUHSC_00938	UPF0413 protein SAOUHSC_00938	no	not assigned		1.7673	1.4844	+			1.67622	1.85838
Q2G0G5_C123	Q2G0G5	VILVGGDUPK	SAOUHSC_00604	Uncharacterized protein	no	Enzyme		1.76665	2.11266	+			1.78806	1.74524
Q2FYR0_C129	Q2FYR0	LASUIDVANIDTPIK	SAOUHSC_01375	Uncharacterized protein	no	not assigned		1.76451	0.982811				2.05547	1.47356
Q2FWK4_C199	Q2FWK4	AGVIETTFKEETETDLFGEQAVLUGGVSK	ilvC	Ketol-acid reductoisomerase (NADP(+))	no	Enzyme	Functional site	1.75733	1.45469	+			1.85431	1.66034
Q2FY89_C128	Q2FY89	TPVNVNGUVSAGVGER	SAOUHSC_01575	Helix-turn-helix domain protein	no	Gene expression and Nucleic acid binding		1.75589	2.40605	+			1.76672	1.74507
Q2FYR0_C12	Q2FYR0	FVFDIDGTLUFDGR	SAOUHSC_01375	Uncharacterized protein	no	not assigned		1.75501	1.59629	+			1.82489	1.68513
Q2G2V4_C24	Q2G2V4	FISPLTPPTUR	SAOUHSC_01914	Putative membrane protein insertion efficiency factor	no	not assigned		1.7535	1.13115				1.95806	1.54893
Q2FY59_C60	Q2FY59	LGANNLVUTMNSTIEEGEVPK	SAOUHSC_01606	Peptidase T, putative	no	Enzyme		1.7533	1.30612	+			1.61692	1.88967
Q2FXY9_C13	Q2FXY9	TVQSAYIHIPFUVR	SAOUHSC_01686	Oxygen-independent coproporphyrinogen-III oxidase-like protein	no	Enzyme		1.75144	1.48232	+			1.84213	1.66075
Q2FVL8_C725	Q2FVL8	LUGALMQYYR	SAOUHSC_02684	Assimilatory nitrite reductase [NAD(P)H], large subunit, putative	no	Enzyme		1.75015	1.26767				1.89894	1.60136
Q2FX49_C69	Q2FX49	TEMAVTNYLUSIR	SAOUHSC_02051	Int gene activator RinA	no	not assigned		1.74543	1.48314	+			1.83564	1.65521
Q2FV02_C585	Q2FV02	TUGYLGNPVQRPVIK	SAOUHSC_02942	Anaerobic ribonucleoside-triphosphate reductase, putative	no	Enzyme		1.73729	2.75057	+			1.74214	1.73244
Q2FZC7_C55	Q2FZC7	ENLNVIAULMEIR	SAOUHSC_01105	Iron-sulphur subunit of succinate dehydrogenase, putative	no	not assigned		1.73432	1.54592	+			1.81187	1.65676
Q2FYZ5_C384	Q2FYZ5	ATLESLUYQTR	glpK	Glycerol kinase	no	Enzyme		1.73301	1.51652	+			1.81594	1.65008
Q2G1J4_C225	Q2G1J4	IUNNLNINVLDVIEMANK	SAOUHSC_00128	Cap5O protein/UDP-N-acetyl-D-mannosaminuronic acid dehydrogenase	no	Enzyme		1.7275	1.06282				1.49124	1.96377
Q2FYZ9_C87	Q2FYZ9	VAIUEQMEDPK	mutS	DNA mismatch repair protein MutS	no	Gene expression and Nucleic acid binding		1.72062	1.15946				1.90858	1.53267
Q2G1K9_C120	Q2G1K9	GLTYVAEPIGVIUGVTPTTNPTSTTIFK	SAOUHSC_00113	Aldehyde-alcohol dehydrogenase	no	Enzyme		1.71984	1.31729	+			1.8502	1.58948
Q2FVX2_C11	Q2FVX2	ASISMSDIYUNGTIFENDDEQLIYLTPSFPQR	SAOUHSC_02551	Uncharacterized protein	no	not assigned		1.71737	1.01561				1.97962	1.45512
Q2FVQ5_C78	Q2FVQ5	DGTVDUSK	mqo	Probable malate:quinone oxidoreductase	no	Enzyme		1.71536	1.41401	+			1.81935	1.61136
Q2FW16_C41	Q2FW16	TANIGDVIVUTVK	rplN	50S ribosomal protein L14	yes	Modulator/Scaffolding/Adaptor		1.71081	1.48821	+			1.79821	1.62341
Q2FVF9_C185	Q2FVF9	YGUALAIEVLK	SAOUHSC_02755	Uncharacterized protein	no	Enzyme	Functional site	1.70904	1.22968				1.86769	1.55039
Q2FZS8_C397	Q2FZS8	AIDLVDQAUATIR	clpB	Chaperone protein ClpB	no	Enzyme		1.7082	1.37291	+			1.82206	1.59433
Q2FY10_C245	Q2FY10	IQEELNYFEEIVSEIGUPVIDVSQK	SAOUHSC_01664	Putative pyruvate, phosphate dikinase regulatory protein	no	Enzyme		1.70818	2.43442	+			1.69831	1.71804
Q2G1W4_C44	Q2G1W4	VAUETTVTTGMALIAGEISTTTYVDIPK	metK	S-adenosylmethionine synthase	yes	Enzyme	Functional site	1.70769	2.11414	+			1.72831	1.68706
Q2FVZ4_C70	Q2FVZ4	LPYTLUYISR	femX	Lipid II:glycine glycyltransferase	yes	Enzyme		1.70532	1.36634	+			1.58991	1.82073
Q2FZS8_C309	Q2FZS8	GELHUIGATTLNEYR	clpB	Chaperone protein ClpB	no	Enzyme		1.70531	1.49755	+			1.79057	1.62005
Q2FXK4_C171	Q2FXK4	LNTLGSIYELGVLUSK	SAOUHSC_01830	Uncharacterized protein	no	Enzyme		1.70495	1.3244	+			1.57783	1.83208
Q2FZV7_C199	Q2FZV7	ITUVEAAPK	SAOUHSC_00878	NADH dehydrogenase-like protein SAOUHSC_00878	no	Enzyme		1.70239	1.72544	+			1.75272	1.65205
Q2G296_C207	Q2G296	EDGFNITVASEIMAILULSR	fhs	Formate--tetrahydrofolate ligase	no	Enzyme		1.69867	1.45252	+			1.60445	1.7929
Q2FXI6_C27	Q2FXI6	QGATVFEFTAGWUPDCR	SAOUHSC_01860	Uncharacterized protein	no	Enzyme		1.69805	1.12495				1.89902	1.49708
Q2FXR3_C242	Q2FXR3	ELESDLKEGUDMMIVKPALSYLDIVR	hemB	Delta-aminolevulinic acid dehydratase	no	Enzyme		1.69605	1.55379	+			1.77053	1.62157
Q2G1E1_C7	Q2G1E1	VVIUDDER	SAOUHSC_00184	Uncharacterized response regulatory protein SAOUHSC_00184	no	Gene expression and Nucleic acid binding		1.68868	1.27098				1.83115	1.54622
Q2FXY7_C431	Q2FXY7	ATMMVPNDYVGAVMELUQR	lepA	Elongation factor 4	no	not assigned		1.68572	1.40569	+			1.7899	1.58154
Q2G2J8_C226	Q2G2J8	ALLDLUDLITVMPVER	SAOUHSC_01413	Uncharacterized protein SAOUHSC_01413	no	not assigned		1.68569	1.33541	+			1.80822	1.56316
Q2G2G2_C17	Q2G2G2	THLLIVDDEQDIVDIUQTYFEYEGYK	saeR	Response regulator SaeR	no	Gene expression and Nucleic acid binding		1.68225	1.35727	+			1.79851	1.56599
Q2G1R6_C408	Q2G1R6	IYVHUQSGVR	SAOUHSC_00036	Uncharacterized protein	no	not assigned		1.68183	1.18338				1.85563	1.50802
Q2G2L3_C103	Q2G2L3	IPGIELMDEULK	tarA	N-acetylglucosaminyldiphosphoundecaprenol N-acetyl-beta-D-mannosaminyltransferase	yes	Enzyme		1.68171	1.88199	+			1.64704	1.71638
Q2G164_C205	Q2G164	EALNFLUAYTTK	SAOUHSC_00291	PfkB family carbohydrate kinase family, putative	no	Enzyme		1.6803	0.934053				1.99099	1.36961
Q2G0R8_C645	Q2G0R8	LLUGDVGYGK	mfd	Transcription-repair-coupling factor	no	Gene expression and Nucleic acid binding	Functional site	1.67485	0.882321				2.02478	1.32493
Q2G0M5_C153	Q2G0M5	VAGELLUQYYFK	SAOUHSC_00535	Uncharacterized epimerase/dehydratase SAOUHSC_00535	no	Enzyme		1.67163	1.52641	+			1.74982	1.59343
Q2FV41_C158	Q2FV41	VNSLAYUSSK	SAOUHSC_02898	Uncharacterized protein	no	Enzyme		1.66824	1.94029	+			1.63817	1.69831
Q2FY43_C49	Q2FY43	DLGIQTVAIYSEGDKDALHTQIADEAYUVGPTLSK	SAOUHSC_01623	Acetyl-CoA carboxylase, biotin carboxylase	yes	Enzyme		1.66472	1.39996	+			1.76897	1.56047
Q2FZD3_C378	Q2FZD3	NVYUDIGDEQSIEQSLSTFSSHMTNIVEILK	mutS2	Endonuclease MutS2	no	Gene expression and Nucleic acid binding		1.66451	1.31898	+			1.79019	1.53884
O05154_C69	O05154	HISLIQLQNASIATUINK	tagX	Putative glycosyltransferase TagX	no	Enzyme		1.66402	1.30586	+			1.79352	1.53451
Q2FVV9_C536	Q2FVV9	FAEEUAK	SAOUHSC_02582	Putative formate dehydrogenase SAOUHSC_02582	no	Enzyme		1.65261	1.48994	+			1.73669	1.56852
Q2G1Z8_C97	Q2G1Z8	YFGHUIDQTALSPK	polC	DNA polymerase III PolC-type	yes	Gene expression and Nucleic acid binding		1.64555	2.61829	+			1.63932	1.65178
Q93T05_C646	Q93T05	EAEDPFTUPHGRPIIINFSK	mutL	DNA mismatch repair protein MutL	no	Gene expression and Nucleic acid binding		1.63789	1.37436	+			1.7467	1.52907
Q2FXP7_C181	Q2FXP7	LELIDAIPEDENVTLYSQGDFTDLUR	thrS	Threonine--tRNA ligase	yes	Gene expression and Nucleic acid binding		1.63699	1.64113	+			1.69577	1.57821
Q2FYG6_C262	Q2FYG6	EFEEUIQIIR	SAOUHSC_01486	Heptaprenyl diphosphate syntase component II, putative	no	Enzyme		1.63583	1.16349				1.81287	1.4588
Q2FV26_C128	Q2FV26	LYDLIMUHLQR	SAOUHSC_02913	Uncharacterized protein	no	Gene expression and Nucleic acid binding		1.63378	1.30612	+			1.76086	1.5067
Q2FZ48_C274	Q2FZ48	GVDILIUDTAGR	ftsY	Signal recognition particle receptor FtsY	yes	not assigned	Functional site	1.63206	1.65174	+			1.68925	1.57487
Q2G2M3_C210	Q2G2M3	LVSDKUDFYIK	SAOUHSC_00513	Uncharacterized protein	no	Gene expression and Nucleic acid binding		1.62478	1.41973	+			1.72199	1.52757
Q2FZJ6_C140	Q2FZJ6	LYIDEQTFVPUTPLGIMEILK	folD	Bifunctional protein FolD	no	Enzyme		1.6211	1.49717	+			1.70221	1.53998
Q2FXV6_C102	Q2FXV6	TPNPDVMUNK	mnmA	tRNA-specific 2-thiouridylase MnmA	yes	Enzyme	Functional site	1.61959	1.40957	+			1.71879	1.5204
Q2G1E1_C248	Q2G1E1	YLQMSPSDYUK	SAOUHSC_00184	Uncharacterized response regulatory protein SAOUHSC_00184	no	Gene expression and Nucleic acid binding		1.61723	2.1942	+			1.63347	1.60098
Q2FWM4_C93	Q2FWM4	IIDULETAHTR	SAOUHSC_02265	Accessory gene regulator protein A	no	Gene expression and Nucleic acid binding		1.6166	2.11001	+			1.63631	1.59689
Q2G163_C115	Q2G163	CVGATTVATTMIUAAMAGIQFFVTGGIGGVHK	psuG	Pseudouridine-5'-phosphate glycosidase	no	Enzyme		1.61501	2.23025	+			1.62994	1.60008
Q2G1K9_C370	Q2G1K9	QAFQIUEDTLHFGGLGHTAVIHTEDETLQK	SAOUHSC_00113	Aldehyde-alcohol dehydrogenase	no	Enzyme		1.61135	1.74396	+			1.657	1.56569
P0A0M9_C108	P0A0M9	DEGFYVATMNAQUHAIPFYESLNFK	SAOUHSC_00995	Putative acetyltransferase SAOUHSC_00995	no	Enzyme		1.60798	0.753289				2.06554	1.15043
Q2FVS1_C142	Q2FVS1	AIDGATLNDUR	SAOUHSC_02621	Putative 3-methyladenine DNA glycosylase	no	Gene expression and Nucleic acid binding		1.60681	0.761979				2.0545	1.15911
Q2FYZ9_C63	Q2FYZ9	KENPIPMUGVPYHSADSYIDTLVNNGYK	mutS	DNA mismatch repair protein MutS	no	Gene expression and Nucleic acid binding		1.60338	1.29056				1.4741	1.73266
Q2FUX7_C210	Q2FUX7	DUPFNIEGGDELVLSK	arcA	Arginine deiminase	no	Enzyme		1.59579	1.45779	+			1.68324	1.50834
Q2FYP0_C126	Q2FYP0	GIIANPNUSTIQSVVPLK	asd	Aspartate-semialdehyde dehydrogenase	no	Enzyme	Functional site	1.59408	1.24826				1.73583	1.45233
Q2G1W4_C308	Q2G1W4	NIVAAGLADQUEVQLAYAIGVAEPVSIAIDTFGTGK	metK	S-adenosylmethionine synthase	yes	Enzyme		1.58811	1.39225	+			1.68934	1.48687
Q2FWF6_C119	Q2FWF6	TTMSIVFEUHIYTLR	SAOUHSC_02335	Uncharacterized protein	no	not assigned		1.58517	2.11545	+			1.56608	1.60426
Q2G1N2_C147	Q2G1N2	DLTIIGUGLIGDK	SAOUHSC_00076	Ornithine cyclodeaminase, putative	no	Enzyme		1.58151	2.21519	+			1.56638	1.59665
Q93T05_C615	Q93T05	LREDVAIMMSUK	mutL	DNA mismatch repair protein MutL	no	Gene expression and Nucleic acid binding		1.58013	1.37836	+			1.68415	1.47612
Q53700_C72	Q53700	DYLEDDPEGFINFUHK	cobB	NAD-dependent protein deacetylase	no	Enzyme		1.5779	1.59862	+			1.64039	1.51541
Q2G1W4_C275	Q2G1W4	HGGGUFSGK	metK	S-adenosylmethionine synthase	yes	Enzyme	Functional site	1.57773	1.47946	+			1.65997	1.49549
Q2G2W9_C89	Q2G2W9	DAENALILUK	SAOUHSC_00455	Uncharacterized protein	no	not assigned		1.57586	1.75285	+			1.6196	1.53212
Q2FX19_C194	Q2FX19	YTQLLETVNDKDFETHIVEAYDUFMSEK	SAOUHSC_02087	Conserved hypothetical phage protein	no	not assigned		1.57577	1.56558	+			1.64312	1.50843
Q2G1K2_C101	Q2G1K2	EQPDALLILGDTNSULAAVSAK	SAOUHSC_00120	UDP-N-acetylglucosamine 2-epimerase	no	Enzyme		1.57363	1.48845	+			1.65398	1.49329
Q2FZJ1_C13	Q2FZJ1	FAVLVFPGSNUDR	purQ	Phosphoribosylformylglycinamidine synthase subunit PurQ	no	Enzyme		1.55874	2.43698	+			1.56769	1.54979
Q2FXA3_C55	Q2FXA3	YSLFDITHQPELUAYVTHLPVDNYHTDAAILYK	hemE	Uroporphyrinogen decarboxylase	no	Enzyme		1.55313	1.47284	+			1.63534	1.47093
Q2FYY6_C291	Q2FYY6	GFTAVUNPLVNSYK	SAOUHSC_01287	Glutamine synthetase	yes	Enzyme		1.55169	1.09298				1.74951	1.35386
Q2G293_C182	Q2G293	LMATGGLEIFATDDPEITSHPANULMAR	SAOUHSC_01847	Uncharacterized protein	no	Enzyme		1.55109	1.8837	+			1.58294	1.51924
Q2FZH7_C172	Q2FZH7	DHIQKUENVIK	SAOUHSC_01027	Uncharacterized protein	no	not assigned		1.54842	1.29505				1.42486	1.67197
Q2G000_C29	Q2G000	FEAGWUPDCR	SAOUHSC_00834	Thioredoxin, putative	no	Enzyme		1.54726	1.75117	+			1.59037	1.50414
Q2FUV5_C95	Q2FUV5	TGLYSUVDDHLIEAR	SAOUHSC_02996	Peptide methionine sulfoxide reductase, putative	no	Enzyme		1.54449	1.33394	+			1.65714	1.43184
Q2FWC6_C17	Q2FWC6	DILINEUIYFASK	SAOUHSC_02372	Uncharacterized protein	no	not assigned		1.54049	1.87586	+			1.5727	1.50828
Q2FWE2_C304	Q2FWE2	VAFIPSEAQFIQLUQDDNDVK	SAOUHSC_02357	Threonylcarbamoyl-AMP synthase	yes	Enzyme		1.53638	1.93551	+			1.56438	1.50838
Q2FV20_C206	Q2FV20	QLLLDGUR	SAOUHSC_02920	2-dehydropantoate 2-reductase	no	Enzyme		1.53345	1.51523	+			1.60706	1.45985
Q2G1X7_C148	Q2G1X7	KLDEVITQUVPSSLNLK	queE	7-carboxy-7-deazaguanine synthase	no	Enzyme		1.53292	1.23048				1.67496	1.39089
Q2G0P8_C37	Q2G0P8	FDUVPSQLNYVIK	ctsR	Transcriptional regulator CtsR	no	Gene expression and Nucleic acid binding		1.52958	0.888886				1.21493	1.84422
Q2G1W2_C273	Q2G1W2	NGVFNIEGGUYAK	pckA	Phosphoenolpyruvate carboxykinase (ATP)	no	Enzyme		1.52869	1.4695	+			1.61023	1.44716
Q2G1D7_C110	Q2G1D7	ENGVHTCLDTSAGUANDTK	pflA	Pyruvate formate-lyase-activating enzyme	no	Enzyme		1.52348	1.40171	+			1.6185	1.42846
Q2FV63_C13	Q2FV63	SQEILNVEGMSUGHCK	copZ	Copper chaperone CopZ	no	not assigned	Functional site	1.52132	1.18144				1.67924	1.3634
Q2FVL8_C673	Q2FVL8	MGVSGUPR	SAOUHSC_02684	Assimilatory nitrite reductase [NAD(P)H], large subunit, putative	no	Enzyme		1.51831	1.51917	+			1.59053	1.4461
Q2FYU7_C468	Q2FYU7	HUYKADPEYGK	katA	Catalase	no	Enzyme		1.51533	1.57141	+			1.57923	1.45144
Q2FWM4_C198	Q2FWM4	EHUYASVR	SAOUHSC_02265	Accessory gene regulator protein A	no	Gene expression and Nucleic acid binding		1.51339	2.30397	+			1.5252	1.50158
Q2FW19_C43	Q2FW19	IUFRELAYK	rpsZ	30S ribosomal protein S14 type Z	yes	Modulator/Scaffolding/Adaptor	Functional site	1.51332	1.06905				1.71731	1.30933
Q2FZ55_C55	Q2FZ55	HUSEKIEMEDEPVR	plsX	Phosphate acyltransferase	yes	Enzyme		1.51279	1.21877				1.65682	1.36877
Q2FY10_C33	Q2FY10	QUKNELLR	SAOUHSC_01664	Putative pyruvate, phosphate dikinase regulatory protein	no	Enzyme		1.51237	1.43158	+			1.60041	1.42433
Q2FZY3_C302	Q2FZY3	YPNUVLLGEGAK	SAOUHSC_00851	UPF0051 protein SAOUHSC_00851	yes	not assigned		1.51153	1.59928	+			1.5713	1.45176
Q2FXA5_C451	Q2FXA5	VTGASFEAVGLPDUITQGK	SAOUHSC_01960	Protoporphyrinogen oxidase	no	Enzyme		1.51143	1.12129				1.69185	1.33102
Q2G2Q2_C93	Q2G2Q2	ISQHDIDYUIVVNFSSR	SAOUHSC_01249	Riboflavin biosynthesis protein	yes	Enzyme		1.50862	1.87702	+			1.54008	1.47716
Q2G0A6_C82	Q2G0A6	LTPYVMSYDDIISFUK	SAOUHSC_00699	Deoxyribodipyrimidine photolyase, putative	no	Gene expression and Nucleic acid binding		1.5086	1.37115	+			1.60957	1.40762
Q2FVM1_C78	Q2FVM1	NGVITWENQQTDYPSUGPDMPEYEPR	SAOUHSC_02681	Nitrate reductase, alpha subunit	no	Enzyme		1.50354	1.16627				1.66521	1.34187
Q2FWK9_C68	Q2FWK9	LHHMDUYR	SAOUHSC_02280	Uncharacterized protein	yes	not assigned		1.50196	1.34434	+			1.39501	1.6089
Q2G0S8_C209	Q2G0S8	DYQQLUQSLSNR	SAOUHSC_00466	Putative 4-diphosphocytidyl-2-C-methyl-D-erythritol kinase	no	Enzyme		1.50004	1.39297	+			1.40458	1.5955
Q2G0R0_C259	Q2G0R0	NAPUIIFIDEIDAVGR	ftsH	ATP-dependent zinc metalloprotease FtsH	no	Enzyme		1.49517	1.1977				1.64464	1.3457
Q2FZW9_C233	Q2FZW9	EILAUGLDVLANEPIDHTHPLMGR	SAOUHSC_00866	D-isomer specific 2-hydroxyacid dehydrogenase, NAD binding domain protein	no	Enzyme		1.49378	1.73992	+			1.45107	1.5365
Q2FVL8_C677	Q2FVL8	SUVESGVK	SAOUHSC_02684	Assimilatory nitrite reductase [NAD(P)H], large subunit, putative	no	Enzyme		1.49268	2.02532	+			1.5148	1.47056
Q2G0T5_C190	Q2G0T5	FVADAQQIEUEDEALAFIAK	dnaX	DNA polymerase III subunit gamma/tau	yes	Gene expression and Nucleic acid binding		1.49133	1.24285				1.62561	1.35705
Q2FY88_C137	Q2FY88	LENLUSLYDIDKEK	SAOUHSC_01576	Exonuclease family	no	Gene expression and Nucleic acid binding		1.49034	1.31061	+			1.60507	1.37562
Q2FYH5_C106	Q2FYH5	AFKDUNIQYRPK	dinG	Probable ATP-dependent helicase DinG homolog	no	Gene expression and Nucleic acid binding		1.48769	1.28622				1.60886	1.36653
Q2FZJ0_C32	Q2FZJ0	VUDILGR	purL	Phosphoribosylformylglycinamidine synthase subunit PurL	no	Enzyme		1.48485	1.67572	+			1.53408	1.43562
Q2FV77_C366	Q2FV77	ASLELLNVESAQELGHVVAAVGLAQNFAAUR	SAOUHSC_02859	3-hydroxy-3-methylglutaryl coenzyme A reductase	yes	Enzyme		1.48352	1.5261	+			1.55297	1.41408
Q2FUY1_C38	Q2FUY1	ALADYINIPYSILQPYQSEUFVR	arcR	HTH-type transcriptional regulator ArcR	no	Gene expression and Nucleic acid binding	Functional site	1.48328	0.987679				1.72509	1.24147
Q2G222_C513	Q2G222	EVSDSMPYPHGQUTWYVYNR	SAOUHSC_02979	N-acetylmuramoyl-L-alanine amidase domain-containing protein SAOUHSC_02979	no	Enzyme		1.48097	1.26884				1.60654	1.35541
Q2FV45_C125	Q2FV45	DLDGHHFNFLVU	SAOUHSC_02894	Uncharacterized protein	no	not assigned		1.47765	0.628491				2.04994	0.905351
Q2FZU5_C286	Q2FZU5	ELFELDUDILVPAAISNQITEDNAHDIK	SAOUHSC_00895	Glutamate dehydrogenase	no	Enzyme		1.47705	2.98822	+			1.47944	1.47467
Q2FZ72_C281	Q2FZ72	ALGIEGGUNVQLALDPHSFDYYIIEVNPR	carB	Carbamoyl-phosphate synthase large chain	no	Enzyme	Functional site	1.47655	1.5178	+			1.54701	1.4061
Q2FY53_C111	Q2FY53	SNNDWQUPLTIR	SAOUHSC_01612	2-oxoisovalerate dehydrogenase, E1 component, beta subunit, putative	no	Enzyme		1.4735	2.31757	+			1.48464	1.46236
Q2G0S2_C255	Q2G0S2	EVYAUCTHPVLSGPAK	prs	Ribose-phosphate pyrophosphokinase	yes	Enzyme		1.46281	1.43916	+			1.54649	1.37913
Q2FVV9_C934	Q2FVV9	TSURLEVITK	SAOUHSC_02582	Putative formate dehydrogenase SAOUHSC_02582	no	Enzyme		1.46257	1.3899	+			1.55631	1.36882
O05154_C173	O05154	FAELQUDETLANTYNHAILVK	tagX	Putative glycosyltransferase TagX	no	Enzyme		1.45965	1.56818	+			1.39764	1.52165
Q2G097_C201	Q2G097	EVADVHLUL	SAOUHSC_00724	Chorismate binding enzyme, putative	no	Enzyme		1.45925	1.10162				1.64159	1.27691
Q2G0J0_C167	Q2G0J0	GDEQYIFGDUAINPELDSQGLAEIAVESAK	SAOUHSC_00574	Phosphate acetyltransferase	yes	Enzyme		1.45812	1.41478	+			1.54636	1.36989
Q2FZC8_C44	Q2FZC8	SHSVUAQGGINGAVNTK	SAOUHSC_01104	Succinate dehydrogenase, flavoprotein chain TC0881, putative	no	Enzyme		1.45654	1.99781	+			1.47954	1.43355
Q2G0U6_C60	Q2G0U6	QUVAFFTLHR	SAOUHSC_00430	Uncharacterized protein	no	Enzyme		1.45402	1.28352				1.57318	1.33485
Q2FZ74_C299	Q2FZ74	EALLEGLLDGTIDUIATDHAPHAR	pyrC	Dihydroorotase	no	Enzyme	Functional site	1.45335	1.40962	+			1.36435	1.54236
Q2G099_C141	Q2G099	YHSLIADGATFPNULK	SAOUHSC_00722	Para-aminobenzoate synthase, glutamine amidotransferase, component II, putative	no	Enzyme		1.44794	1.28275				1.56682	1.32907
Q2FV16_C373	Q2FV16	EGUMNHLR	mqo	Probable malate:quinone oxidoreductase	no	Enzyme		1.43889	1.29048				1.55493	1.32285
Q2FUQ4_C158	Q2FUQ4	LSVLSELULPLVK	rsmG	Ribosomal RNA small subunit methyltransferase G	no	Gene expression and Nucleic acid binding		1.43693	2.04606	+			1.45723	1.41662
Q2FXV6_C199	Q2FXV6	DSTGIUFIGEK	mnmA	tRNA-specific 2-thiouridylase MnmA	yes	Enzyme	Functional site	1.43427	1.63577	+			1.48641	1.38213
Q2FZ02_C227	Q2FZ02	FUTYCIVPFTR	miaB	tRNA-2-methylthio-N(6)-dimethylallyladenosine synthase	no	not assigned	Functional site	1.43253	1.21577				1.29519	1.56986
Q2FVY1_C156	Q2FVY1	IKNDUDTQLT	SAOUHSC_02541	Molybdopterin-guanine dinucleotide biosynthesis protein MobB	no	not assigned		1.43171	1.79591	+			1.4677	1.39572
Q2FWE8_C193	Q2FWE8	DQGTIUIYVAIGQK	atpA	ATP synthase subunit alpha	no	Receptor/Transporter/Channel		1.42537	1.77594	+			1.46289	1.38786
Q2G078_C430	Q2G078	DISUNLGSLNIVNVMESGK	SAOUHSC_00742	Ribonucleoside-diphosphate reductase	yes	Enzyme		1.42429	1.41286	+			1.51086	1.33771
Q2FXM2_C426	Q2FXM2	VASALVIUQMFDEV	SAOUHSC_01813	Uncharacterized protein	no	not assigned		1.42411	0.495961				0.643579	2.20464
Q2G0T3_C83	Q2G0T3	SVIUVVEDDKDVIAMEK	recR	Recombination protein RecR	no	Gene expression and Nucleic acid binding		1.42287	1.07932				1.61013	1.2356
Q2G0W0_C56	Q2G0W0	VUSTNEGLLNIK	SAOUHSC_00414	Uncharacterized protein	no	not assigned		1.42236	1.26416				1.54427	1.30045
Q2FZ37_C102	Q2FZ37	LYIEEGUAIQK	sucC	Succinate--CoA ligase [ADP-forming] subunit beta	yes	Enzyme	Functional site	1.4182	1.36038	+			1.51551	1.32089
Q2FWG3_C13	Q2FWG3	MFNQSYLNVYFIUGTSDVPSHR	thiE	Thiamine-phosphate synthase	no	Enzyme		1.41779	1.29832				1.53007	1.3055
P47768_C624	P47768	QVVSAATAUIPFLENDDSNR	rpoB	DNA-directed RNA polymerase subunit beta	yes	Gene expression and Nucleic acid binding		1.41685	1.08575				1.60056	1.23315
Q2FZW0_C271	Q2FZW0	NVYVVGDUADLPHAPSAQLAEVQGDQIADVLK	SAOUHSC_00875	Uncharacterized protein	no	Enzyme		1.41468	1.62147	+			1.46783	1.36153
Q2FYZ9_C541	Q2FYZ9	IISELDULQSFAEIAQK	mutS	DNA mismatch repair protein MutS	no	Gene expression and Nucleic acid binding		1.40742	1.0068				1.62681	1.18802
Q2FXJ0_C152	Q2FXJ0	TSFLIGDGTGMGLPESDYFAFEAUEYR	murC	UDP-N-acetylmuramate--L-alanine ligase	yes	Enzyme		1.40721	1.4752	+			1.48128	1.33313
Q2G2U1_C226	Q2G2U1	TLEVNFUNEIDAFYQYR	saeS	Histidine protein kinase SaeS	no	Receptor/Transporter/Channel		1.40376	1.40082	+			1.49149	1.31603
Q2FZC6_C143	Q2FZC6	INPHVEVHGVAUPGFVPLVEQMR	murI	Glutamate racemase	yes	Enzyme		1.40138	1.06617				1.59156	1.21121
Q2G032_C151	Q2G032	TIVFNTNHQELDGSETVVSGASUTTNSLAPVAK	SAOUHSC_00795	Glyceraldehyde-3-phosphate dehydrogenase	yes	Enzyme	Functional site	1.39912	1.39625	+			1.48749	1.31075
Q2FWH3_C286	Q2FWH3	ATDUSGLVR	ddl	D-alanine--D-alanine ligase	yes	Enzyme		1.39587	1.42294	+			1.31297	1.47876
Q2FY72_C48	Q2FY72	ELVYHNGAVAVUAVTPK	SAOUHSC_01593	NUDIX domain protein	no	not assigned		1.3948	1.54887	+			1.45675	1.33285
Q2FZB0_C187	Q2FZB0	NNVANALMQGAAIMGMNFHLVUPK	argF	Ornithine carbamoyltransferase	no	Enzyme		1.39028	1.34341	+			1.48949	1.29107
Q2FW62_C189	Q2FW62	QETTEWUEK	SAOUHSC_02445	Zinc-type alcohol dehydrogenase-like protein	no	Enzyme		1.38863	2.09108	+			1.40632	1.37095
Q2FYG9_C148	Q2FYG9	VAVGALUK	aroC	Chorismate synthase	no	Enzyme		1.3859	1.93177	+			1.36042	1.41137
Q2G0I1_C78	Q2G0I1	QAUDNFVSR	SAOUHSC_00584	Uncharacterized protein	no	not assigned		1.38294	2.02766	+			1.40332	1.36255
Q2FYZ7_C29	Q2FYZ7	MUVLLDMHIGHIK	SAOUHSC_01274	Glycerol uptake operon antiterminator regulatory protein	no	Gene expression and Nucleic acid binding		1.38286	1.50779	+			1.45038	1.31533
Q2FV86_C161	Q2FV86	GVAVVIUPNDLLTEK	SAOUHSC_02849	Pyruvate oxidase, putative	no	Enzyme		1.38009	2.68115	+			1.37557	1.3846
Q2FZ43_C110	Q2FZ43	ADHIVFIUGHYEGYDER	trmD	tRNA (guanine-N(1)-)-methyltransferase	yes	Gene expression and Nucleic acid binding	Functional site	1.37741	0.736882				1.7853	0.969528
Q2G0S9_C14	Q2G0S9	NSIDUHVGNR	SAOUHSC_00465	Uncharacterized protein	no	not assigned		1.37606	1.30426	+			1.48356	1.26857
Q2G030_C40	Q2G030	EVESVIUAPAIQLDALTTAVK	tpiA	Triosephosphate isomerase	yes	Enzyme		1.37568	1.05236				1.56847	1.18288
Q2FYZ7_C53	Q2FYZ7	QNHIEUFIHIDLIK	SAOUHSC_01274	Glycerol uptake operon antiterminator regulatory protein	no	Gene expression and Nucleic acid binding		1.37519	1.59028	+			1.43071	1.31968
Q2FZW0_C217	Q2FZW0	IYNUDEPKDIDLVVWTAGIQPVEVVR	SAOUHSC_00875	Uncharacterized protein	no	Enzyme		1.37422	1.35634	+			1.4694	1.27905
Q2FW70_C138	Q2FW70	VHHPNEILEUILIEAPDLK	SAOUHSC_02436	Uncharacterized protein	no	not assigned		1.36498	0.897265				1.64025	1.0897
Q2FUX1_C239	Q2FUX1	LISQSUIK	SAOUHSC_02974	Uncharacterized protein	no	Receptor/Transporter/Channel		1.36408	1.60891	+			1.41684	1.31133
Q2FXM3_C218	Q2FXM3	MLPFQGYVLQHFELMDDGFUQVK	SAOUHSC_01812	Uncharacterized protein	no	Gene expression and Nucleic acid binding		1.3623	2.20934	+			1.37551	1.34908
Q2FZ48_C311	Q2FZ48	AVPDAPHEALLULDATTGQNALSQAR	ftsY	Signal recognition particle receptor FtsY	yes	not assigned		1.36217	1.49611	+			1.4305	1.29384
Q2G0M6_C439	Q2G0M6	VFAUGGIPK	araB	Ribulokinase	no	Enzyme		1.36168	1.39411	+			1.44811	1.27525
Q2FXI9_C974	Q2FXI9	SVUINSILMSLLYK	SAOUHSC_01857	Uncharacterized protein	no	Gene expression and Nucleic acid binding	Functional site	1.36157	1.21524				1.49226	1.23088
Q2FXM8_C232	Q2FXM8	HSIVLVAEGCMTAQDUQK	pfkA	ATP-dependent 6-phosphofructokinase	yes	Enzyme		1.36121	1.37742	+			1.27142	1.45101
Q2FXZ4_C304	Q2FXZ4	IISEQHDNGWVULVGQK	prmA	Ribosomal protein L11 methyltransferase	no	Enzyme		1.35963	1.0133				1.56837	1.15088
Q2FVB2_C248	Q2FVB2	VULANLLR	fbp	Fructose-1,6-bisphosphatase class 3	no	Enzyme		1.35789	1.60901	+			1.4104	1.30539
Q2FZ72_C759	Q2FZ72	EIEVDAIUDGETVIIPGIMEHIER	carB	Carbamoyl-phosphate synthase large chain	no	Enzyme	Functional site	1.35611	0.88862				1.63524	1.07697
Q2G2E9_C191	Q2G2E9	TMTUGTSISLR	SAOUHSC_00030	Uncharacterized protein	no	not assigned		1.35322	1.33399	+			1.45191	1.25453
Q2G0G2_C106	Q2G0G2	NEQGPYYAGLTAUYLLVNK	SAOUHSC_00607	Uncharacterized protein	no	not assigned		1.35236	1.44659	+			1.42841	1.27632
Q2G2L2_C97	Q2G2L2	AHIDLDFPISVEQVILSGUYK	SAOUHSC_00637	Uncharacterized protein	no	not assigned		1.35221	1.09221				1.52492	1.17951
Q2FXE1_C70	Q2FXE1	ASEGLYUHHISEDKFQNLSDLR	SAOUHSC_01922	Uncharacterized protein	no	not assigned		1.35067	1.22836				1.47643	1.2249
Q2G2H4_C177	Q2G2H4	PVLTGVNWLIQENELIUTATDSHR	SAOUHSC_00002	Beta sliding clamp	yes	Gene expression and Nucleic acid binding		1.35037	0.990321				1.56915	1.13159
Q2FWD9_C12	Q2FWD9	MYETYHSGWIEUITGSMFSGK	tdk	Thymidine kinase	no	Enzyme	Functional site	1.3492	1.30924	+			1.45339	1.24501
Q2G1C8_C317	Q2G1C8	LAMMQGNLAQAMATUAQLANMQAHGEYDEVATSTAK	SAOUHSC_00197	Uncharacterized protein	no	Enzyme		1.34911	1.59755	+			1.29555	1.40267
Q2G037_C87	Q2G037	NNIYIUR	whiA	Putative sporulation transcription regulator WhiA	no	Gene expression and Nucleic acid binding		1.34789	1.62448	+			1.2976	1.39819
Q2FYG1_C43	Q2FYG1	NQDAVDELNTUHTNK	gpsA	Glycerol-3-phosphate dehydrogenase [NAD(P)+]	no	Enzyme		1.34025	3.20623	+			1.34156	1.33894
Q2G1G7_C269	Q2G1G7	QIUPHSIQPQFTTQR	SAOUHSC_00156	Uncharacterized protein	no	Enzyme		1.33943	1.15754				1.4864	1.19246
Q2G045_C77	Q2G045	KLURPETPAIIVTR	hprK	HPr kinase/phosphorylase	yes	Enzyme		1.33586	1.58202	+			1.39083	1.2809
Q2G0B7_C8	Q2G0B7	IAVYUGASK	SAOUHSC_00688	Cytokinin riboside 5'-monophosphate phosphoribohydrolase	no	not assigned		1.33586	1.19649				1.46978	1.20195
Q2FXT6_C269	Q2FXT6	GMDMFDUVLPTR	tgt	Queuine tRNA-ribosyltransferase	no	Gene expression and Nucleic acid binding	Functional site	1.33197	1.20381				1.46326	1.20069
Q2FVC3_C403	Q2FVC3	LQAALESDILUPFHYFGVTDYVHQGIKEDDVTK	SAOUHSC_02790	Uncharacterized protein	no	Gene expression and Nucleic acid binding		1.32918	0.991384				1.54399	1.11437
Q2G1C0_C196	Q2G1C0	SILSDAUK	tarI	Ribitol-5-phosphate cytidylyltransferase 1	yes	Enzyme		1.32825	1.19832				1.46085	1.19566
Q2FZ19_C372	Q2FZ19	IHASSHGUMEELK	rnj2	Ribonuclease J 2	yes	Gene expression and Nucleic acid binding		1.32756	1.29888				1.43256	1.22255
Q2G2R8_C238	Q2G2R8	ETQGNNGWUAGYTMSELLNATYNTNK	sspP	Staphopain A	no	Enzyme	Functional site	1.3268	0.761124				1.69724	0.956354
Q2FZ55_C92	Q2FZ55	SGEADGUVSAGNTGALMSAGLFIVGR	plsX	Phosphate acyltransferase	yes	Enzyme		1.32562	1.39474	+			1.40964	1.2416
Q2G0J0_C310	Q2G0J0	GUSIEDVYNLSIITAAQALQ	SAOUHSC_00574	Phosphate acetyltransferase	yes	Enzyme		1.32505	2.46993	+			1.318	1.33211
Q2FYP2_C29	Q2FYP2	FTEGNUYGLIGANGAGK	SAOUHSC_01392	ABC transporter, ATP-binding protein, putative	no	not assigned	Functional site	1.32439	2.50074	+			1.31783	1.33096
Q2G2P2_C345	Q2G2P2	QGYIGAEELQVFLANKPEIYIUGGTK	SAOUHSC_00204	Globin domain protein	no	Enzyme		1.3226	1.88365	+			1.34976	1.29544
Q2G0E0_C63	Q2G0E0	YDGFYWUR	graR	Response regulator protein GraR	no	Gene expression and Nucleic acid binding		1.32184	2.05025	+			1.30334	1.34033
Q2FYR0_C248	Q2FYR0	HINNNAQAIUK	SAOUHSC_01375	Uncharacterized protein	no	not assigned		1.32002	1.03132				1.51433	1.12571
Q2FY27_C15	Q2FY27	IILAADVGGTTUK	SAOUHSC_01646	Glucokinase, putative	no	Enzyme		1.31851	1.06855				1.49644	1.14057
Q2FZT4_C200	Q2FZT4	SLTGGUPMGPYIVTK	SAOUHSC_00906	Uncharacterized protein SAOUHSC_00906	no	Enzyme		1.31366	1.39965	+			1.39598	1.23134
Q2G2Q7_C100	Q2G2Q7	NLFKEEGLEPWTSUEFDFTR	SAOUHSC_00276	Uncharacterized protein	no	not assigned		1.31228	1.14345				1.1635	1.46106
Q2FV86_C413	Q2FV86	FIISSWLGTMGUGLPGAIASK	SAOUHSC_02849	Pyruvate oxidase, putative	no	Enzyme		1.31205	1.05434				1.49508	1.12902
Q2FZP7_C362	Q2FZP7	YATQTIUR	ugtP	Processive diacylglycerol beta-glucosyltransferase	no	Enzyme		1.31129	1.57799	+			1.36575	1.25683
Q2FWD6_C279	Q2FWD6	VVNNTGQVUTAGTR	SAOUHSC_02363	Putative aldehyde dehydrogenase SAOUHSC_02363	no	Enzyme	Functional site	1.3112	1.5899	+			1.36418	1.25822
Q2G0M7_C214	Q2G0M7	SPLEGYSVUVFPDSLDEGANIEIGYLPGR	hchA	Protein/nucleic acid deglycase HchA	no	Enzyme		1.31081	1.36382	+			1.40004	1.22158
Q2FVW3_C171	Q2FVW3	VLYQGYTUFR	SAOUHSC_02579	Uncharacterized protein	no	not assigned		1.31077	1.01167				1.51278	1.10876
Q2FXX1_C228	Q2FXX1	HVEVQVMGDGQDNYVHLGERDUSVQR	SAOUHSC_01709	Acetyl-CoA carboxylase, biotin carboxylase, putative	no	Enzyme		1.31073	1.4801	+			1.37896	1.24251
Q2G067_C133	Q2G067	FIGLUNQSIK	SAOUHSC_00754	Uncharacterized protein	no	not assigned		1.30915	1.16568				1.45012	1.16819
Q2G037_C225	Q2G037	LVNUETANLNK	whiA	Putative sporulation transcription regulator WhiA	no	Gene expression and Nucleic acid binding		1.30314	1.51795	+			1.3653	1.24099
Q2G0K2_C86	Q2G0K2	QUGSGLESVQYACR	SAOUHSC_00558	Acetyl-CoA acetyltransferase, putative	no	Enzyme		1.30119	2.26884	+			1.3122	1.29019
Q2G007_C47	Q2G007	ENYFUDRDYQDFLTNCQILIQNK	SAOUHSC_00821	Uncharacterized protein	no	not assigned		1.2994	2.13194	+			1.28434	1.31446
Q2FZ22_C98	Q2FZ22	GTADYMGMLATVMNALALQDSLEQLDUDTR	pyrH	Uridylate kinase	yes	Enzyme		1.29724	1.46643	+			1.36692	1.22756
Q2FXY5_C299	Q2FXY5	HYQLDELLNIIDAUAETDYK	SAOUHSC_01690	Uncharacterized protein	yes	Gene expression and Nucleic acid binding		1.29422	1.80779	+			1.32587	1.26256
Q2FZ03_C70	Q2FZ03	MVELEUPSIISQVK	SAOUHSC_01268	Uncharacterized protein	no	not assigned		1.29299	1.22297				1.41489	1.17108
Q2FXU0_C64	Q2FXU0	GFIIGUPVAYSMGIGFAPVR	apt	Adenine phosphoribosyltransferase	no	Enzyme		1.28892	1.51119	+			1.35137	1.22647
Q2FZ74_C178	Q2FZ74	AIVAHUEDNSLIYGGAMHEGKR	pyrC	Dihydroorotase	no	Enzyme	Functional site	1.28443	1.25081				1.39797	1.17089
Q2G2G7_C134	Q2G2G7	VULDHMKPDKPFIK	SAOUHSC_01054	UPF0637 protein SAOUHSC_01054	no	not assigned		1.28121	1.39878	+			1.36166	1.20076
Q2G0Q0_C145	Q2G0Q0	VGQGVDILUK	pdxT	Pyridoxal 5'-phosphate synthase subunit PdxT	no	Enzyme		1.28073	1.24924				1.39435	1.1671
Q2FY19_C106	Q2FY19	VIDYUPIDQIK	fur	Ferric uptake regulation protein	no	Gene expression and Nucleic acid binding	Functional site	1.27726	1.33774	+			1.36961	1.18492
Q2FVX8_C34	Q2FVX8	DFDTDKGGQUVR	SAOUHSC_02544	Molybdenum cofactor biosynthesis protein B	no	not assigned		1.27591	1.02465				1.46668	1.08515
Q2FW81_C278	Q2FW81	LVNVDUKDTVLEYSELDPEVANQFNNANIGIHAFK	SAOUHSC_02423	Probable uridylyltransferase SAOUHSC_02423	no	Enzyme		1.27406	1.16291				1.41213	1.13599
O34090_C204	O34090	DTLLPAIGQGALGIEUR	hemC	Porphobilinogen deaminase	no	Enzyme		1.27231	1.48831	+			1.33729	1.20733
Q2G1D8_C383	Q2G1D8	TYUAKMSIK	pflB	Formate acetyltransferase	no	Enzyme		1.26453	1.22009				1.38455	1.1445
Q2FYG1_C320	Q2FYG1	VLFENISVKEUVK	gpsA	Glycerol-3-phosphate dehydrogenase [NAD(P)+]	no	Enzyme		1.26436	1.19147				1.39259	1.13613
P47768_C514	P47768	MUPIETPEGPNIGLINSLSSYAR	rpoB	DNA-directed RNA polymerase subunit beta	yes	Gene expression and Nucleic acid binding		1.26208	1.27953				1.36648	1.15769
Q2FZ03_C54	Q2FZ03	VGPLETTVQGNMNEULILIQSLNER	SAOUHSC_01268	Uncharacterized protein	no	not assigned		1.26177	1.27537				1.36715	1.1564
Q2FXR2_C79	Q2FXR2	TAQYUESLGIR	SAOUHSC_01773	Uroporphyrinogen-III synthase, putative	no	Enzyme		1.26105	1.30393	+			1.16247	1.35963
Q2FZ58_C153	Q2FZ58	ANNTEDUIELMEYIIVK	SAOUHSC_01193	Uncharacterized protein SAOUHSC_01193	no	Enzyme		1.2558	1.37631	+			1.33885	1.17274
Q2FV11_C126	Q2FV11	GNPMDYEGWAEPEGMETWDFAHULPYFK	betA	Oxygen-dependent choline dehydrogenase	no	Enzyme		1.25548	1.60311	+			1.30469	1.20627
Q2FZX4_C272	Q2FZX4	HUQAGPLVR	lipA	Lipoyl synthase	no	Enzyme		1.25463	1.22028				1.37366	1.1356
Q2FZ05_C106	Q2FZ05	AKPVKPEGUHAQLIELPFTATAK	SAOUHSC_01266	Uncharacterized protein	no	Enzyme		1.25137	1.26099				1.35941	1.14333
Q2FV28_C200	Q2FV28	SIEMUNDYNIFR	queH	Epoxyqueuosine reductase QueH	no	Enzyme		1.24847	1.38435	+			1.32953	1.16742
Q2FV86_C123	Q2FV86	LUEDVAVYNHQIEK	SAOUHSC_02849	Pyruvate oxidase, putative	no	Enzyme		1.24813	1.22028				1.36654	1.12971
Q2FWE4_C69	Q2FWE4	ETGVTFAFQGUEHINR	SAOUHSC_02355	UPF0340 protein SAOUHSC_02355	no	not assigned		1.2481	1.20302				1.37134	1.12486
Q2G0I8_C234	Q2G0I8	ASDVIEHHNFEALADIFNEUHADLK	SAOUHSC_00577	Mevalonate kinase, putative	yes	Enzyme		1.24557	1.045				1.42315	1.06798
Q2G178_C100	Q2G178	DLFKEEDLEPWTSUEFDFTR	SAOUHSC_00269	Uncharacterized protein	no	not assigned		1.24405	1.47643	+			1.17875	1.30935
Q2G2W4_C31	Q2G2W4	MIUAYCNINR	SAOUHSC_02631	Uncharacterized protein	no	Gene expression and Nucleic acid binding	Functional site	1.24312	0.771807				1.58135	0.904889
Q2FYK3_C289	Q2FYK3	TAGDUISDLGYPEALPEMVLLLDDPQK	cvfC	Conserved virulence factor C	no	not assigned		1.24049	1.12399				1.38764	1.09335
Q2FZZ9_C10	Q2FZZ9	NUTTCKK	SAOUHSC_00835	Uncharacterized protein	no	not assigned		1.23846	1.61223	+			1.28599	1.19093
Q2FZ61_C7	Q2FZ61	MHINLLUSDR	SAOUHSC_01190	Uncharacterized protein	yes	Enzyme		1.2365	1.14934				1.37479	1.09822
Q2G0G6_C194	Q2G0G6	ENEAVLQYUVDHQITFIPYFPLASGILAGK	SAOUHSC_00603	Uncharacterized protein	no	Enzyme		1.23618	1.29693				1.3344	1.13796
Q2G0M1_C181	Q2G0M1	YDDWINSFNAUPVVR	SAOUHSC_00539	Uncharacterized protein	no	Enzyme		1.23604	0.986081				1.43829	1.03378
Q2FXG9_C181	Q2FXG9	NHAPFIUAIEK	SAOUHSC_01878	Uncharacterized protein	no	not assigned		1.23471	2.85184	+			1.23744	1.23199
Q2FW45_C11	Q2FW45	MEIHVYTGPLUGFNEYINSEVK	SAOUHSC_02472	Uncharacterized protein	no	not assigned		1.2273	0.947724				1.00755	1.44705
O06446_C775	O06446	DYQNEGHELFDIMMQNIEEDTUK	secA1	Protein translocase subunit SecA 1	yes	Receptor/Transporter/Channel		1.22286	1.43034	+			1.29425	1.15147
Q2G0I6_C95	Q2G0I6	SUDIAMK	SAOUHSC_00579	Phosphomevalonate kinase	yes	Enzyme		1.21844	0.891938				1.46728	0.969602
Q2FZF6_C123	Q2FZF6	ENGIIVUEFSNHEEIDYQPFNMIK	SAOUHSC_01074	Uncharacterized protein	no	Gene expression and Nucleic acid binding		1.2159	0.974264				1.42046	1.01135
Q2G0T1_C24	Q2G0T1	AVEUDTIETNGSAINEQTLEVIR	rnmV	Ribonuclease M5	no	Gene expression and Nucleic acid binding		1.21329	0.937866				1.43563	0.990955
P60393_C27	P60393	ENGVYIDUTLGGAGHALYLLNQLNDDGR	rsmH	Ribosomal RNA small subunit methyltransferase H	no	Gene expression and Nucleic acid binding		1.21225	1.53648	+			1.15685	1.26766
Q2FZ39_C277	Q2FZ39	IGNYUFDIFK	SAOUHSC_01214	Ribosome biogenesis GTPase A	yes	not assigned		1.21183	3.40706	+			1.21257	1.21108
Q2FW29_C27	Q2FW29	VMVIUENPK	rpmJ	50S ribosomal protein L36	yes	Modulator/Scaffolding/Adaptor		1.21151	1.31951	+			1.30287	1.12015
Q2G046_C122	Q2G046	VGKPYUPNHNIEIESQTVQQMVDR	uvrA	UvrABC system protein A	no	Gene expression and Nucleic acid binding		1.21076	1.12259				1.35485	1.06667
Q2FZ66_C127	Q2FZ66	HDYGNSVCVTTQVGUR	rlmN	Probable dual-specificity RNA methyltransferase RlmN	no	Gene expression and Nucleic acid binding	Functional site	1.20711	1.31957	+			1.29813	1.1161
Q2FX94_C209	Q2FX94	YMLDRUETMLSESK	fumC	Fumarate hydratase class II	no	Enzyme		1.20343	0.998781				1.39457	1.01228
Q2G0S8_C147	Q2G0S8	TALUTGR	SAOUHSC_00466	Putative 4-diphosphocytidyl-2-C-methyl-D-erythritol kinase	no	Enzyme		1.20086	1.55391	+			1.25358	1.14814
P0A0K3_C105	P0A0K3	NDVPTFAIUHGPQILIDTDDLK	SAOUHSC_02013	Uncharacterized protein SAOUHSC_02013	no	not assigned		1.20037	1.03375				1.37606	1.02467
Q2FZ19_C233	Q2FZ19	LIVSUYASNFIR	rnj2	Ribonuclease J 2	yes	Gene expression and Nucleic acid binding		1.19807	1.53349	+			1.2532	1.14294
Q2G204_C79	Q2G204	MMUQFVEDIDVVVNILR	SAOUHSC_00942	GTP pyrophosphokinase, putative	no	Enzyme		1.19784	0.787274				0.883855	1.51182
Q2FZJ4_C90	Q2FZJ4	LLUEKYNIPQGYQAIQLLQDR	purK	N5-carboxyaminoimidazole ribonucleotide synthase	no	Enzyme		1.19452	1.76843	+			1.22651	1.16253
Q2FZJ1_C188	Q2FZJ1	GNVUGMMPHPER	purQ	Phosphoribosylformylglycinamidine synthase subunit PurQ	no	Enzyme	Functional site	1.19395	1.41828	+			1.26562	1.12228
Q2G2V4_C30	Q2G2V4	FYPTUSEYTR	SAOUHSC_01914	Putative membrane protein insertion efficiency factor	no	not assigned		1.19266	2.69074	+			1.18884	1.19648
Q2G238_C275	Q2G238	AFQQAVAUGTATAFDEDLATR	SAOUHSC_00707	Tagatose-6-phosphate kinase	no	Enzyme		1.19089	1.47403	+			1.25375	1.12803
Q2FYN4_C199	Q2FYN4	GVHUHIGSQIEGTEAFIETAK	lysA	Diaminopimelate decarboxylase	no	Enzyme		1.19058	1.67753	+			1.2299	1.15127
Q2G1Y6_C400	Q2G1Y6	EIDGVMUEPFER	SAOUHSC_01058	GTP-binding protein TypA, putative	no	not assigned		1.18827	1.19403				1.30807	1.06846
Q2G1Q4_C505	Q2G1Q4	NUESFSK	SAOUHSC_00049	Uncharacterized protein	no	not assigned		1.18819	2.5093	+			1.19397	1.18242
Q2G2L0_C124	Q2G2L0	LDSLLNFPETUPHGGVIPR	SAOUHSC_00638	Uncharacterized protein	no	Modulator/Scaffolding/Adaptor		1.18816	0.851116				0.920827	1.45549
Q2FZJ4_C180	Q2FZJ4	LIETSEUVAEK	purK	N5-carboxyaminoimidazole ribonucleotide synthase	no	Enzyme	Functional site	1.18695	1.59365	+			1.2345	1.1394
Q2G0N5_C48	Q2G0N5	DGLFUER	rpoC	DNA-directed RNA polymerase subunit beta'	yes	Gene expression and Nucleic acid binding		1.1869	1.32696	+			1.27488	1.09893
Q2FZ58_C193	Q2FZ58	GLLUVYEGFLK	SAOUHSC_01193	Uncharacterized protein SAOUHSC_01193	no	Enzyme		1.18546	1.2904				1.28108	1.08984
Q2FVT6_C215	Q2FVT6	QYADFADIFUETGVFTIEQSQHYMQK	hutI	Imidazolonepropionase	no	Enzyme		1.18471	1.29975				1.27822	1.09119
Q2G0L9_C137	Q2G0L9	EAUSTLLTTFFK	tadA	tRNA-specific adenosine deaminase	no	Gene expression and Nucleic acid binding		1.18463	1.02596				1.36121	1.00806
Q2G182_C31	Q2G182	DIEAUQK	esxB	ESAT-6 secretion system extracellular protein B	no	not assigned		1.18242	1.16014				1.31139	1.05346
Q2FWB5_C68	Q2FWB5	VGDQVIFYQVQTDTGLLGUGEIISVETGAQNK	SAOUHSC_02383	Uncharacterized protein	no	not assigned		1.18022	1.3187	+			1.26939	1.09106
Q2FZA2_C201	Q2FZA2	QHSIIVGDSLTSDILGGINAGIATUWFNFR	SAOUHSC_01137	Uncharacterized protein	no	not assigned		1.17964	0.752611				0.843421	1.51586
Q2FXU2_C27	Q2FXU2	GYULLVGIGQNSTEQDADVIAKK	dtd	D-aminoacyl-tRNA deacylase	yes	Gene expression and Nucleic acid binding		1.17781	1.01778				1.35675	0.99886
Q2FXW5_C207	Q2FXW5	GGCUQSCR	SAOUHSC_01716	Uncharacterized protein	no	Enzyme		1.17691	1.33251	+			1.26303	1.09079
Q2G0Q0_C75	Q2G0Q0	EALQNSTLPMFGTUAGLIVLAQDIVGEEGYLNK	pdxT	Pyridoxal 5'-phosphate synthase subunit PdxT	no	Enzyme	Functional site	1.17596	1.54396	+			1.22879	1.12314
Q2FXF5_C15	Q2FXF5	TIYFICTGNSUR	arsC	Arsenate reductase	no	Enzyme	Functional site	1.17533	0.995764				1.36334	0.987321
Q2FWW3_C407	Q2FWW3	IAFSUVEK	SAOUHSC_02158	Uncharacterized protein	no	Enzyme		1.17343	1.53991	+			1.22663	1.12022
P95689_C102	P95689	MTGILUR	serS	Serine--tRNA ligase	yes	Gene expression and Nucleic acid binding		1.17285	1.3306	+			1.25906	1.08665
Q2FVW3_C186	Q2FVW3	GLIDDIDLKHPDUAK	SAOUHSC_02579	Uncharacterized protein	no	not assigned		1.17051	1.63925	+			1.21272	1.1283
Q2G2W9_C198	Q2G2W9	ISGAUGR	SAOUHSC_00455	Uncharacterized protein	no	not assigned		1.16931	1.06022				1.33021	1.00842
Q2G240_C97	Q2G240	IAANQINDNEULFIDAGSSTLELIK	SAOUHSC_00706	Uncharacterized protein	no	Gene expression and Nucleic acid binding		1.16915	1.06155				1.32953	1.00877
Q2G2D7_C242	Q2G2D7	VPVUGAISSYNHPEADIGPR	SAOUHSC_02447	Uncharacterized protein	no	Enzyme		1.16638	1.24201				1.2716	1.06115
Q2FWD4_C376	Q2FWD4	AGAULIIAGLIAEGVTTIYNVK	murA	UDP-N-acetylglucosamine 1-carboxyvinyltransferase	no	Enzyme		1.16619	1.38646	+			1.24154	1.09085
Q2FZ73_C248	Q2FZ73	IPFFGIULGHQLFALSQGASSFK	carA	Carbamoyl-phosphate synthase small chain	no	Enzyme	Functional site	1.16202	1.24266				1.2667	1.05735
Q2G242_C260	Q2G242	VUHVHGIK	SAOUHSC_00508	Uncharacterized protein	no	not assigned		1.15804	1.03804				1.32585	0.990229
Q2FY04_C54	Q2FY04	TFYGTNVENASYPLSIUAER	SAOUHSC_01670	Cytidine deaminase	no	Enzyme		1.15772	1.23991				1.26267	1.05276
Q2G097_C26	Q2G097	IKUSSER	SAOUHSC_00724	Chorismate binding enzyme, putative	no	Enzyme		1.1558	0.925318				1.37395	0.937646
Q2FYJ3_C244	Q2FYJ3	VDSTIADGUDVK	tdcB	L-threonine dehydratase catabolic TdcB	no	Enzyme		1.15118	1.45917	+			1.21406	1.0883
Q2G039_C30	Q2G039	SLVIQULEDMGYFCVDNLPPVLLPK	SAOUHSC_00787	Nucleotide-binding protein SAOUHSC_00787	no	not assigned	Functional site	1.15113	1.41147	+			1.08093	1.22132
Q2FZH5_C365	Q2FZH5	LULAQQDIFR	SAOUHSC_01029	Phosphoenolpyruvate-protein phosphotransferase	no	Enzyme		1.14915	1.14776				1.27814	1.02016
Q2FZP0_C133	Q2FZP0	FPWLSANIEYNVTKEPYFSTPYUIK	SAOUHSC_00960	Uncharacterized protein	no	not assigned		1.14881	1.0567				1.30819	0.98943
Q2FZ22_C47	Q2FZ22	MDUEIAVIVGGGNIWR	pyrH	Uridylate kinase	yes	Enzyme		1.14743	0.977997				1.33878	0.956081
Q2FVV9_C592	Q2FVV9	GHNNVQGUSDMGSMPDK	SAOUHSC_02582	Putative formate dehydrogenase SAOUHSC_02582	no	Enzyme		1.14718	0.8954				1.37955	0.914804
Q2FZ31_C191	Q2FZ31	YDKGEAAYLNUPMTEDEFNR	trmFO	Methylenetetrahydrofolate--tRNA-(uracil-5-)-methyltransferase TrmFO	no	Gene expression and Nucleic acid binding		1.1441	1.67399	+			1.18218	1.10601
Q2FXZ6_C11	Q2FXZ6	STVAFHTLGUK	SAOUHSC_01679	Uncharacterized protein	no	Enzyme		1.13938	0.771466				0.829119	1.44964
Q2FWD2_C29	Q2FWD2	QSLEIQMAAQULIQAIGGEGYVYVK	SAOUHSC_02367	Uncharacterized protein	no	not assigned		1.13894	1.25918				1.23769	1.04019
Q2FZY4_C128	Q2FZY4	IKUATLAWK	SAOUHSC_00850	Uncharacterized protein	yes	Enzyme		1.13757	1.51961	+			1.19163	1.08352
Q2FXY0_C37	Q2FXY0	NKPGFVPEHNMFRDDVIUR	SAOUHSC_01700	Uncharacterized protein	yes	not assigned		1.13581	0.903969				1.36126	0.910349
Q2G2R0_C7	Q2G2R0	IALGUDHIVTDTK	lacB	Galactose-6-phosphate isomerase subunit LacB	no	Enzyme		1.1352	1.21551				1.2441	1.0263
Q2G1C8_C202	Q2G1C8	ETGKPHUFVVRPEQDGVDIEVIDNK	SAOUHSC_00197	Uncharacterized protein	no	Enzyme		1.13463	1.24608				1.23603	1.03323
Q2FXZ6_C74	Q2FXZ6	QNPDAVIUVTGCYAQTSSAEIMEIPGVDVVVGTQDR	SAOUHSC_01679	Uncharacterized protein	no	Enzyme		1.13446	1.36834	+			1.21089	1.05804
Q2FUZ8_C448	Q2FUZ8	GVUSVHFAER	SAOUHSC_02947	Sulfite reductase [NADPH] flavoprotein alpha-component	no	Enzyme	Functional site	1.13332	1.26447				1.23039	1.03626
Q2FXZ2_C15	Q2FXZ2	IIGIDLGTTNSUVTVLEGDEPK	dnaK	Chaperone protein DnaK	yes	Modulator/Scaffolding/Adaptor		1.1321	1.09935				1.27431	0.989895
Q2FYM2_C303	Q2FYM2	DUDKKNFAEIEAEIANLAVK	odhB	Dihydrolipoyllysine-residue succinyltransferase component of 2-oxoglutarate dehydrogenase complex	no	Enzyme		1.1319	0.75732				0.81295	1.45085
Q2G157_C10	Q2G157	MLPHGLIVSUQALPDEPLHSSFIMSK	nanE	Putative N-acetylmannosamine-6-phosphate 2-epimerase	no	Enzyme		1.13086	0.873419				1.37217	0.889551
Q2G1V2_C150	Q2G1V2	AHEELQIUAQNLQISKPTYAR	SAOUHSC_02685	Uncharacterized protein	no	Enzyme		1.12819	1.40091	+			1.19868	1.05769
Q2G274_C429	Q2G274	SPEEUEIFLVEGDSAGGSTK	gyrB	DNA gyrase subunit B	yes	Gene expression and Nucleic acid binding		1.12539	1.12869				1.25743	0.993348
Q2FWG2_C190	Q2FWG2	VTGAGULLGGVIAGFLFR	thiM	Hydroxyethylthiazole kinase	no	Enzyme	Functional site	1.11869	1.23242				1.22188	1.0155
Q2G025_C115	Q2G025	GIVTMUAPMGGK	SAOUHSC_00802	Carboxylesterase, putative	no	Enzyme		1.11747	2.28804	+			1.12651	1.10842
Q2FZZ3_C61	Q2FZZ3	IDLNFYPQFUK	SAOUHSC_00841	Uncharacterized protein	no	Enzyme		1.11358	1.87614	+			1.13685	1.09031
Q2G1T1_C150	Q2G1T1	YULKLDEALK	SAOUHSC_00827	Uncharacterized protein	no	not assigned		1.11189	1.17686				0.995231	1.22854
Q2FWA0_C541	Q2FWA0	GAHPUIISMEGLEK	glmS	Glutamine--fructose-6-phosphate aminotransferase [isomerizing]	yes	Enzyme		1.11115	1.49444	+			1.1671	1.0552
Q2FV14_C446	Q2FV14	EUAVVAK	SAOUHSC_02929	Acetyl-CoA synthetase, putative	no	Enzyme		1.10552	1.30052				1.19263	1.01841
Q2G0P5_C311	Q2G0P5	GELQUIGATTLDEYR	clpC	ATP-dependent Clp protease ATP-binding subunit ClpC	no	not assigned		1.10532	1.2049				1.21399	0.996652
Q2FXT9_C251	Q2FXT9	VLNDQUPTSVK	SAOUHSC_01744	Uncharacterized protein	no	Gene expression and Nucleic acid binding		1.10517	2.07965	+			1.11962	1.09072
Q2FWA0_C2	Q2FWA0	UGIVGYIGYDNAK	glmS	Glutamine--fructose-6-phosphate aminotransferase [isomerizing]	yes	Enzyme	Functional site	1.09422	2.14618	+			1.08194	1.10649
Q2FY46_C123	Q2FY46	LTEEGUFDK	xseA	Exodeoxyribonuclease 7 large subunit	no	Gene expression and Nucleic acid binding		1.0915	1.11534				1.22361	0.959399
Q2G2A4_C346	Q2G2A4	GATUTISNIGSAGGQWFTPVINHPEVAILGIGR	SAOUHSC_01042	Dihydrolipoamide acetyltransferase component of pyruvate dehydrogenase complex	no	Enzyme		1.08907	1.25558				1.18428	0.993855
Q2G159_C129	Q2G159	IFUMTLGTGIGGAYK	SAOUHSC_00296	ROK family protein	no	not assigned		1.08857	1.18168				1.20151	0.97563
Q2G2R5_C49	Q2G2R5	ADALIEEGNNUIAEAHR	SAOUHSC_02451	PTS system lactose-specific IIA component, putative	no	not assigned		1.08852	1.69964	+			1.12267	1.05436
P47768_C593	P47768	FMDDEVVUR	rpoB	DNA-directed RNA polymerase subunit beta	yes	Gene expression and Nucleic acid binding		1.08706	1.27383				1.17817	0.995955
Q2FZL5_C175	Q2FZL5	EIWYLUR	menB	1,4-dihydroxy-2-naphthoyl-CoA synthase	no	Enzyme		1.08656	1.20679				1.19292	0.980207
Q2FVM1_C51	Q2FVM1	TTHGVNUTGSCSWK	SAOUHSC_02681	Nitrate reductase, alpha subunit	no	Enzyme		1.0851	2.14381	+			1.09734	1.07286
Q2FXI5_C345	Q2FXI5	SLLSEAIUNLDNNQIETLQYK	SAOUHSC_01861	Uncharacterized protein	no	Enzyme		1.08318	1.24705				1.17977	0.986593
Q2G255_C322	Q2G255	HGETGFVVDVGDUDSASDYAIR	SAOUHSC_01475	Uncharacterized protein	no	Enzyme		1.08298	1.28988				1.17044	0.995521
Q2G147_C90	Q2G147	GAVNMUCILEQDTSIYGDFQR	SAOUHSC_00308	Lipoate--protein ligase	no	not assigned		1.08212	1.19392				1.19125	0.972987
Q2FYG5_C110	Q2FYG5	VLKPGGMVVULETSQPTLPVFK	SAOUHSC_01487	Menaquinone biosynthesis methyltransferase, putative	no	not assigned		1.08133	1.1795				1.19409	0.96857
Q2FZK7_C230	Q2FZK7	YKPQVNSSINDYIUK	atl	Bifunctional autolysin	no	Enzyme		1.08001	1.15556				1.19906	0.960956
Q2G248_C126	Q2G248	SFVFGPUSVESFEQVEAVAK	SAOUHSC_01852	Uncharacterized protein	no	Enzyme		1.07903	1.28028				1.16813	0.989938
Q2FXU7_C235	Q2FXU7	GQMPPSSNAFVPSVVGLIUASYVVNDVLK	SAOUHSC_01735	Uncharacterized protein	no	Enzyme		1.07866	1.26618				1.17068	0.98664
Q2G0N0_C82	Q2G0N0	HYAHVDUPGHADYVK	tuf	Elongation factor Tu	yes	Gene expression and Nucleic acid binding	Functional site	1.0781	1.21583				1.18144	0.97476
Q2FZW9_C24	Q2FZW9	DADAUFITLSEQIDAEILAQSPNLK	SAOUHSC_00866	D-isomer specific 2-hydroxyacid dehydrogenase, NAD binding domain protein	no	Enzyme		1.07734	1.13118				1.20301	0.951662
Q2FVM3_C185	Q2FVM3	LULTSPK	SAOUHSC_02679	Respiratory nitrate reductase, delta subunit, putative	no	Modulator/Scaffolding/Adaptor		1.07469	0.748232				1.38427	0.76511
Q2FY68_C244	Q2FY68	GGTTQAGLDTLSQYDLVSIFEDULNAAVDR	proC	Pyrroline-5-carboxylate reductase	no	Enzyme		1.07461	1.03874				1.23008	0.919149
Q2G234_C131	Q2G234	YAGYDNUGDPAEK	SAOUHSC_02134	Nitric oxide synthase oxygenase	no	Enzyme		1.07345	1.8527	+			1.09712	1.04978
Q2G0T0_C121	Q2G0T0	EAVENHLQDUEK	rsmA	Ribosomal RNA small subunit methyltransferase A	no	Gene expression and Nucleic acid binding		1.07332	1.64319	+			1.11168	1.03496
Q2FZ74_C207	Q2FZ74	ELGIPGIPNIUESVQIAR	pyrC	Dihydroorotase	no	Enzyme		1.07231	1.36434	+			1.14522	0.999401
Q2FY47_C46	Q2FY47	LSAAUDTTLK	xseB	Exodeoxyribonuclease 7 small subunit	no	Gene expression and Nucleic acid binding		1.07017	1.18657				1.17995	0.960392
Q2FZD2_C29	Q2FZD2	VESGVQLVDFWATWUGPCK	trxA	Thioredoxin	yes	Enzyme		1.06674	1.53039	+			1.11618	1.0173
Q2G0Q8_C85	Q2G0Q8	IKPGDTIVEPTSGNTGIGLAFVUAAK	SAOUHSC_00488	Cysteine synthase	no	Enzyme		1.06663	2.50239	+			1.0719	1.06136
Q2FV75_C130	Q2FV75	MSAQAVGGAVGSNPLSIIVPUHR	SAOUHSC_02861	Methylated-DNA--protein-cysteine methyltransferase	no	Gene expression and Nucleic acid binding	Functional site	1.05818	1.21194				1.16053	0.955834
Q2G0Y6_C223	Q2G0Y6	VLUAMSGGVDSSVVAVLLHK	guaA	GMP synthase [glutamine-hydrolyzing]	yes	Enzyme	Functional site	1.05755	1.24802				0.963464	1.15164
Q2FZH4_C12	Q2FZH4	SEIIVYTQNDUPPCTFVK	SAOUHSC_01030	Uncharacterized protein	no	Enzyme		1.05706	1.45941	+			1.11477	0.999351
Q2FWM0_C292	Q2FWM0	TIHYNYFEAGQUAMEEIQQMLK	SAOUHSC_02269	Sucrose operon repressor, putative	no	Gene expression and Nucleic acid binding		1.05604	1.4911	+			1.10963	1.00245
Q2G0Q7_C94	Q2G0Q7	SEVAEAULK	SAOUHSC_00489	Dihydropteroate synthase	yes	Enzyme		1.05602	1.78701	+			1.08311	1.02892
Q2FZU6_C216	Q2FZU6	ELUDEHNVLFIADEIQAGLGR	rocD	Ornithine aminotransferase	no	Enzyme		1.05013	1.44145	+			1.10988	0.990371
Q2FWD1_C175	Q2FWD1	ENVMYVHUTLLPYIK	pyrG	CTP synthase	yes	Enzyme		1.04684	1.23588				1.14264	0.951053
Q2FVV9_C271	Q2FVV9	TVCTYCGVGUSFEVWTK	SAOUHSC_02582	Putative formate dehydrogenase SAOUHSC_02582	no	Enzyme	Functional site	1.04496	1.55505	+			1.09072	0.999206
Q2FVM2_C179	Q2FVM2	RDEDGIVLVDQDAUR	SAOUHSC_02680	Nitrate reductase, beta subunit	no	Enzyme		1.04476	1.07601				1.18333	0.906198
Q2FZ87_C189	Q2FZ87	LNLEYAPUDELSMGMSNDYLIAVEEGATFVR	SAOUHSC_01153	Pyridoxal phosphate homeostasis protein	no	not assigned		1.0445	1.08931				0.910195	1.17881
Q2G0S2_C256	Q2G0S2	EVYACUTHPVLSGPAK	prs	Ribose-phosphate pyrophosphokinase	yes	Enzyme		1.04331	3.30873	+			1.04411	1.0425
Q2G1J3_C358	Q2G1J3	IUEAIEYYFGLR	SAOUHSC_00129	UDP-N-acetylglucosamine 2-epimerase	no	Enzyme		1.04163	0.709412				1.3715	0.711759
Q2G066_C30	Q2G066	HSETUPISANAYDQFNK	SAOUHSC_00755	Uncharacterized protein	no	not assigned		1.0413	0.802853				1.30422	0.778377
Q2FWC9_C6	Q2FWC9	ELUFEGITLK	SAOUHSC_02370	Uncharacterized protein	no	not assigned		1.03774	1.20731				1.1392	0.936288
Q2FX89_C23	Q2FX89	TUAGTNTHLHLIKPLGFR	SAOUHSC_01988	Putative tRNA (cytidine(34)-2'-O)-methyltransferase	no	Gene expression and Nucleic acid binding		1.03721	1.18216				1.1447	0.929715
Q2FYZ9_C630	Q2FYZ9	QVAIISIMAQMGAYVPUK	mutS	DNA mismatch repair protein MutS	no	Gene expression and Nucleic acid binding		1.03654	1.86427	+			1.0588	1.01428
Q2G0M8_C142	Q2G0M8	NDAILSDELNHASIIDGUR	SAOUHSC_00532	Uncharacterized protein	no	not assigned		1.03382	1.20375				1.13573	0.93191
Q2FYV1_C101	Q2FYV1	QDFDEIVDYURDR	SAOUHSC_01323	Uncharacterized protein	no	not assigned		1.03041	1.37599	+			1.09861	0.962215
Q2FY70_C3	Q2FY70	MNUQSESVVR	SAOUHSC_01595	Uncharacterized protein	no	not assigned		1.03036	1.95192	+			1.04845	1.01228
Q2FX22_C207	Q2FX22	VDIUEDYINLVSLNPK	SAOUHSC_02084	Phage repressor protein, putative	no	Gene expression and Nucleic acid binding		1.03004	1.20858				1.13045	0.929636
Q2G1U0_C182	Q2G1U0	IQUIVEAEHLK	gmk	Guanylate kinase	yes	Enzyme		1.02958	1.13241				1.14934	0.909819
Q2G2V3_C193	Q2G2V3	NHYASAIGUK	menE	2-succinylbenzoate--CoA ligase	no	Enzyme		1.0291	0.85345				1.25936	0.798839
Q2G163_C158	Q2G163	TNVTVIUAGAK	psuG	Pseudouridine-5'-phosphate glycosidase	no	Enzyme	Functional site	1.02745	1.44661	+			1.08522	0.969675
Q2G0K8_C239	Q2G0K8	HPNVEIYLDDEAUPK	nagB	Glucosamine-6-phosphate deaminase	no	Enzyme		1.02698	1.36396	+			1.09687	0.957097
Q2G1M1_C155	Q2G1M1	IINATSQAGVEGNPGLSLYUSTK	SAOUHSC_00086	3-ketoacyl-acyl carrier protein reductase, putative	no	Enzyme		1.02547	1.28846				1.10856	0.942383
Q2FVY1_C130	Q2FVY1	NEEELQVLQQLSNVUYSINVR	SAOUHSC_02541	Molybdopterin-guanine dinucleotide biosynthesis protein MobB	no	not assigned		1.02468	1.00326				1.18574	0.863621
Q2G2S7_C90	Q2G2S7	LQNEQIFVYVUHGNHDPLSSK	SAOUHSC_01975	Uncharacterized protein	no	not assigned		1.02388	0.851142				1.25423	0.793521
Q2FZT1_C7	Q2FZT1	MQPHLIULDLDGTLLNDNKEISSYTK	SAOUHSC_00909	Uncharacterized protein	no	not assigned		1.02381	1.93136	+			1.04264	1.00497
Q2G0G1_C34	Q2G0G1	PGEALVQTEYUGVCHTDLHVK	adh	Alcohol dehydrogenase	no	Enzyme	Functional site	1.02172	1.0908				0.890797	1.15264
Q2FZ23_C240	Q2FZ23	YLQEIUAVDQDFVK	tsf	Elongation factor Ts	yes	Gene expression and Nucleic acid binding		1.02138	1.55152	+			1.06647	0.97629
Q2FV76_C111	Q2FV76	EAUYAATPAIQLAK	SAOUHSC_02860	HMG-CoA synthase, putative	yes	Enzyme		1.021	1.28011				1.10534	0.936666
Q2FV14_C267	Q2FV14	YQINVLCUTPTEYR	SAOUHSC_02929	Acetyl-CoA synthetase, putative	no	Enzyme		1.02069	0.923054				1.21437	0.827006
Q2FXG2_C92	Q2FXG2	GATSHYDYVUNEVAK	ribH	6,7-dimethyl-8-ribityllumazine synthase	no	Enzyme	Functional site	1.02045	1.31496	+			1.09822	0.942683
Q2FXP2_C202	Q2FXP2	SUNESIIPTSTGAAK	SAOUHSC_01794	Glyceraldehyde-3-phosphate dehydrogenase	no	Enzyme		1.01977	1.27704				1.10461	0.934932
Q2FV95_C112	Q2FV95	GAIATNEVNAAMGIIUATPTAGSSGTIPGALFK	SAOUHSC_02839	L-serine dehydratase, iron-sulfur-dependent, alpha subunit	no	Enzyme		1.01794	1.33815	+			1.09146	0.944409
Q2G1B7_C42	Q2G1B7	TEFEVVVVDDUSTDQTLQIVEK	SAOUHSC_00228	Uncharacterized protein	no	Enzyme		1.01732	0.587131				1.45518	0.57947
Q2FV14_C96	Q2FV14	LGVAIIPUSEMLR	SAOUHSC_02929	Acetyl-CoA synthetase, putative	no	Enzyme		1.01474	1.10979				1.13914	0.89033
Q2FWL2_C287	Q2FWL2	QSLADQUK	tsaD	tRNA N6-adenosine threonylcarbamoyltransferase	yes	Enzyme		1.0144	1.43795	+			1.07259	0.956205
Q2FZF1_C44	Q2FZF1	LSHRVUK	rpmF	50S ribosomal protein L32	yes	Modulator/Scaffolding/Adaptor		1.01405	1.07747				1.14809	0.880019
Q2FWD4_C118	Q2FWD4	CVIGLPGGUPLGPR	murA	UDP-N-acetylglucosamine 1-carboxyvinyltransferase	no	Enzyme	Functional site	1.01043	1.10374				1.13606	0.884793
Q2FWE4_C141	Q2FWE4	HVUVPVR	SAOUHSC_02355	UPF0340 protein SAOUHSC_02355	no	not assigned		1.00994	1.93203	+			1.0285	0.99139
Q2FXN6_C65	Q2FXN6	DGIDVUK	SAOUHSC_01800	Two-component response regulator, putative	no	Gene expression and Nucleic acid binding		1.00936	1.74936	+			1.0376	0.981114
Q2G0I3_C25	Q2G0I3	FNSSSLAELTULNPVQLR	SAOUHSC_00582	Uncharacterized protein	no	Gene expression and Nucleic acid binding		1.00932	1.23256				1.10239	0.916247
Q2FVN7_C115	Q2FVN7	EDPELUVLR	SAOUHSC_02665	Uncharacterized protein	no	not assigned		1.00833	1.6333	+			1.0452	0.97147
Q2FXP5_C148	Q2FXP5	LDVAMAADDIUTAITNGEQVK	SAOUHSC_01791	Uncharacterized protein	yes	Gene expression and Nucleic acid binding		1.00806	2.05167	+			1.02212	0.994
Q2G2S0_C199	Q2G2S0	MSGAVGTFANIPPEIESYVUK	purB	Adenylosuccinate lyase	no	Enzyme		1.00728	1.16584				0.898866	1.1157
Q2FWE2_C209	Q2FWE2	IDGIVQAEQSEEGLESTVLDUTSFPYK	SAOUHSC_02357	Threonylcarbamoyl-AMP synthase	yes	Enzyme	Functional site	1.00564	1.14181				1.12009	0.891186
Q2G2D2_C251	Q2G2D2	ISVFSENNDIDAVGAUVGAK	nusA	Transcription termination/antitermination protein NusA	yes	Gene expression and Nucleic acid binding		1.00387	1.99451	+			1.01984	0.987903
Q2G0N1_C258	Q2G0N1	QATTNVEFYPVLUGTAFK	fusA	Elongation factor G	yes	Gene expression and Nucleic acid binding		1.00097	1.08191				1.13192	0.870029
Q2FZL8_C369	Q2FZL8	AQATLFAGUGIVK	SAOUHSC_00982	Uncharacterized protein	no	Enzyme		1.00073	1.85771	+			1.02254	0.978909
Q2FUZ8_C299	Q2FUZ8	HIEFLLDDFSESYEPGDUIVALPQNDPELVEK	SAOUHSC_02947	Sulfite reductase [NADPH] flavoprotein alpha-component	no	Enzyme		0.996524	1.25419				0.90912	1.08393
Q2G1A9_C248	Q2G1A9	IGTMISHVPIYPYSUHPK	SAOUHSC_00236	6-phospho-beta-glucosidase, putative	no	Enzyme		0.994579	2.93604	+			0.992768	0.996389
O07325_C175	O07325	CVEAUGVDVLDVYSDAYNYGSILTATEK	ftsA	Cell division protein FtsA	yes	not assigned		0.994066	2.1447	+			1.00526	0.982875
Q2FXZ6_C47	Q2FXZ6	VDFEANADVFVINTUTVTNTGDKK	SAOUHSC_01679	Uncharacterized protein	no	Enzyme		0.991648	0.739063				1.28374	0.699552
Q2FXN3_C230	Q2FXN3	GLIPNVDFYSASVYHUMEIPHDLFTPIFAVSR	SAOUHSC_01802	Uncharacterized protein	no	Enzyme		0.990811	0.838095				1.22076	0.76086
Q2G2C1_C675	Q2G2C1	ISEGTIUYTGDILNPER	SAOUHSC_01064	Pyruvate carboxylase	no	Enzyme		0.990723	1.33166	+			0.918081	1.06336
Q2FXT6_C150	Q2FXT6	SMQIQNDLGSDIMMAFDEUPPMPAEYDYVK	tgt	Queuine tRNA-ribosyltransferase	no	Gene expression and Nucleic acid binding	Functional site	0.989922	1.22862				1.08204	0.897804
Q2G266_C428	Q2G266	SEYHHCPVILGSATPULESYAR	priA	Primosomal protein N'	yes	Gene expression and Nucleic acid binding		0.989563	0.948101				1.16659	0.812539
Q2G0N1_C390	Q2G0N1	DTGTGDTLUGEK	fusA	Elongation factor G	yes	Gene expression and Nucleic acid binding		0.987269	0.982999				1.14999	0.824548
Q2FZU6_C363	Q2FZU6	PYCEALKEEGLLUK	rocD	Ornithine aminotransferase	no	Enzyme		0.985094	1.02293				1.13297	0.837217
Q2FVL8_C278	Q2FVL8	GIVVNDVMQTSDSNVYAVGEUAEHNGK	SAOUHSC_02684	Assimilatory nitrite reductase [NAD(P)H], large subunit, putative	no	Enzyme		0.983836	1.07107				1.11583	0.851839
Q2G0Y6_C248	Q2G0Y6	AIGDQLTUIFVDHGLLR	guaA	GMP synthase [glutamine-hydrolyzing]	yes	Enzyme		0.98327	1.26191				1.06798	0.898557
Q2FXJ9_C125	Q2FXJ9	LQNISTNLADUFNLNEQLPLQFLDNVK	SAOUHSC_01835	Uncharacterized protein	no	not assigned		0.982113	1.16426				1.08821	0.876016
Q2FXJ0_C368	Q2FXJ0	VFLUEIFGSIR	murC	UDP-N-acetylmuramate--L-alanine ligase	yes	Enzyme		0.976183	1.09088				1.10125	0.851119
Q2FYF5_C38	Q2FYF5	GQUVILDNEDVTDFLR	SAOUHSC_01496	Cytidylate kinase	yes	Enzyme		0.976162	1.90209	+			0.956949	0.995376
Q2FV60_C69	Q2FV60	DGFTFDMGPTIVMMPDVYKDVFTAUGK	crtN	Dehydrosqualene desaturase	no	Enzyme		0.976125	1.0458				1.11503	0.837217
Q2G039_C38	Q2G039	SLVIQCLEDMGYFUVDNLPPVLLPK	SAOUHSC_00787	Nucleotide-binding protein SAOUHSC_00787	no	not assigned		0.972831	1.15211				1.08093	0.864731
Q2G2W9_C161	Q2G2W9	LLGGIGPUGR	SAOUHSC_00455	Uncharacterized protein	no	not assigned		0.97067	1.03288				1.11303	0.828307
Q2G2U6_C65	Q2G2U6	DGMEVUR	walR	Transcriptional regulatory protein WalR	yes	Gene expression and Nucleic acid binding		0.969853	1.13541				1.08188	0.857822
Q2G144_C7	Q2G144	ILVVUGHGLGSSFMVEMNAQEALR	SAOUHSC_00311	Uncharacterized protein	no	Receptor/Transporter/Channel		0.968497	0.419576				1.62793	0.30906
Q2FX16_C47	Q2FX16	CSHUAVGYTLQTVDPEPLDMDLIYR	SAOUHSC_02090	Conserved hypothetical phage protein	no	Enzyme		0.967118	0.955093				1.13731	0.79693
Q2FZI6_C260	Q2FZI6	HMNPUGVGIGDTIEQAFQHAYEADSQSIFGGIVALNR	purH	Bifunctional purine biosynthesis protein PurH	no	Enzyme		0.965713	1.89927	+			0.984845	0.946581
Q2FYY6_C170	Q2FYY6	GEPTLELNDDGGYFDLAPTDLGENURR	SAOUHSC_01287	Glutamine synthetase	yes	Enzyme		0.962656	2.09803	+			0.974723	0.95059
Q2G2C7_C39	Q2G2C7	VHYAGIUGTDIHTYEGHYK	SAOUHSC_00217	Sorbitol dehydrogenase, putative	no	Enzyme		0.961479	1.23304				1.05004	0.872918
[truncated: 560 more rows]

## Sheet: DGS 50 µM
Identifier	Leading razor protein	Sequence	Gene name	Name	Essential?	GO class	Functional site	Median log2(R) 50 mM DGS	Neg. log10(p)	T-test significant	Hit?		log2(R) 50 mM DGS 1	log2(R) 50 mM DGS 2
[truncated: 969 more rows]

[truncated: 9 more sheets: DGS 20 µM, DGS 10 µM, 15 25 µM, 15 12.5 µM, 15 6.25 µM, DGS,15-100,12.5 µM, DGS,15-62.5,12.5 µM, DGS,15-12.5,12.5 µM, Global analysis]
